# Supplementary material for: Integration analysis of transcriptome and metabolome reveals role of piceatannol in regulation of fruit drop in Chinese bayberry (Morella rubra Sieb. et Zucc.)
Source: Research Square preprint supplement (doi:10.21203/rs.3.rs-7503570/v1), 2025-10-09
Supplement: Supplementary file 1 [file 0961eb0f24168bd2dcea0335.xlsx]

## Sheet: Table S1
Supplemental Table S4. Information of 31 up- and 50 down-regulated DEGs with treatment of 4-CPA compared to the CK
Table legend:
Gene ID	ID of diffrentially expressed genes (NCBI database)
Log2FC	log2 Fold change value of each gene
Qvalue	adjusted p-values
ck_1 FPKM to ck-3_FPKM	fragments per kilobase of transcript per million mapped reads of RNA-seq in ck
F-1_FPKM to F-3_FPKM	fragments per kilobase of transcript per million mapped reads of RNA-seq in treatment of 4-CPA
TFs	transcription factors
GO	Gene Ontology Analysis
Kegg Orthology	annotation from Kyoto Encyclopedia of Genes and Genomes database
Nr	annotation from Non-Redundant Protein Sequence database
Gene ID	log2(Piceatannol/CK)	Qvalue(CK-vs-Piceatannol)	ck_3 FPKM	P_3 FPKM	P_2 FPKM	ck_2 FPKM	P_1 FPKM	ck_1 FPKM	TFs	GO	Kegg Orthology	Nr
CJ030_MR0G000309	2.73138	5.88598e-05	3.01	9.26	17.05	1.98	2.72	19.79		GO:0005783//endoplasmic reticulum;GO:0005789//endoplasmic reticulum membrane;GO:0016021//integral component of membrane;GO:0005634//nucleus;GO:0005886//plasma membrane;GO:0000247//C-8 sterol isomerase activity;GO:0047750//cholestenol delta-isomerase activity;GO:0004769//steroid delta-isomerase activity;GO:0016126//sterol biosynthetic process;	K01824//cholestenol Delta-isomerase [EC:5.3.3.5]+ko00100//Steroid biosynthesis+ko01100//Metabolic pathways+ko01110//Biosynthesis of secondary metabolites;	>KAB1201693.1 putative 3-beta-hydroxysteroid-Delta(8),Delta(7)-isomerase [Morella rubra] >KAB1207684.1 putative 3-beta-hydroxysteroid-Delta(8),Delta(7)-isomerase [Morella rubra]
CJ030_MR0G004419	-21.4371	1.02073e-07	2.38	0	0	0	0	0	C2H2	GO:0005681//spliceosomal complex;GO:0005524//ATP binding;GO:0016787//hydrolase activity;GO:0003723//RNA binding;GO:0003724//RNA helicase activity;GO:0009793//embryo development ending in seed dormancy;GO:0006397//mRNA processing;GO:0008380//RNA splicing;	K12813//pre-mRNA-splicing factor ATP-dependent RNA helicase DHX16 [EC:3.6.4.13]+ko03040//Spliceosome;	>KAB1201290.1 putative pre-mRNA-splicing factor ATP-dependent RNA helicase DHX16 [Morella rubra] >KAB1201299.1 putative pre-mRNA-splicing factor ATP-dependent RNA helicase DHX16 [Morella rubra]
CJ030_MR0G004644	-6.66464	0.0243746	0.21	0	0	0.15	0.62	0		GO:0016604//nuclear body;GO:0005730//nucleolus;GO:0005634//nucleus;GO:0005666//RNA polymerase III complex;GO:0000419//RNA polymerase V complex;GO:0003677//DNA binding;GO:0003899//DNA-directed 5'-3' RNA polymerase activity;GO:0046872//metal ion binding;GO:0050832//defense response to fungus;GO:0006306//DNA methylation;GO:0035194//posttranscriptional gene silencing by RNA;GO:0030422//production of …	K16251//DNA-directed RNA polymerase V subunit 1 [EC:2.7.7.6]+ko03020//RNA polymerase;	>KAB1201212.1 DNA-directed RNA polymerase V subunit 1 [Morella rubra] >KAB1201219.1 DNA-directed RNA polymerase V subunit 1 [Morella rubra]
CJ030_MR0G004661	1.68835	0.0357246	7.39	22.07	35.57	10.24	9.02	17.09	HSF	GO:0005789//endoplasmic reticulum membrane;GO:0016021//integral component of membrane;GO:0020037//heme binding;GO:0005506//iron ion binding;GO:0004497//monooxygenase activity;GO:0016705//oxidoreductase activity, acting on paired donors, with incorporation or reduction of molecular oxygen;GO:0006952//defense response;GO:0006587//serotonin biosynthetic process from tryptophan;	K24541//tryptamine 5-hydroxylase [EC:1.14.-.-]+ko00380//Tryptophan metabolism+ko01100//Metabolic pathways+ko01110//Biosynthesis of secondary metabolites;	>KAB1201180.1 Cytochrome P450 71A9 [Morella rubra] >KAB1201183.1 Cytochrome P450 71A9 [Morella rubra]
CJ030_MR0G004662	23.5975	1.72408e-06	0	0	110.99	0	0	0	MYB_related	GO:0009507//chloroplast;GO:0009408//response to heat;	K13993//HSP20 family protein+ko04141//Protein processing in endoplasmic reticulum;	>KAB1201181.1 Small heat shock protein, chloroplastic [Morella rubra] >KAB1201182.1 Small heat shock protein, chloroplastic [Morella rubra]
CJ030_MR0G004663	23.5975	1.72408e-06	0	0	110.99	0	0	0	MYB_related	GO:0009507//chloroplast;GO:0009408//response to heat;	K13993//HSP20 family protein+ko04141//Protein processing in endoplasmic reticulum;	>KAB1201181.1 Small heat shock protein, chloroplastic [Morella rubra] >KAB1201182.1 Small heat shock protein, chloroplastic [Morella rubra]
CJ030_MR0G004664	1.68835	0.0357246	7.39	22.07	35.57	10.24	9.02	17.09	HSF	GO:0005789//endoplasmic reticulum membrane;GO:0016021//integral component of membrane;GO:0020037//heme binding;GO:0005506//iron ion binding;GO:0004497//monooxygenase activity;GO:0016705//oxidoreductase activity, acting on paired donors, with incorporation or reduction of molecular oxygen;GO:0006952//defense response;GO:0006587//serotonin biosynthetic process from tryptophan;	K24541//tryptamine 5-hydroxylase [EC:1.14.-.-]+ko00380//Tryptophan metabolism+ko01100//Metabolic pathways+ko01110//Biosynthesis of secondary metabolites;	>KAB1201180.1 Cytochrome P450 71A9 [Morella rubra] >KAB1201183.1 Cytochrome P450 71A9 [Morella rubra]
CJ030_MR0G006613	-4.83009	0.0203486	5.63	1.16	0.11	1.66	49.37	0.32				>KAB1200684.1 Protein E6 [Morella rubra]
CJ030_MR0G008028	-7.95924	0.000695273	1.78	0.09	0	1.31	56.44	0.09	FAR1	GO:0042973//glucan endo-1,3-beta-D-glucosidase activity;GO:0005975//carbohydrate metabolic process;GO:0006952//defense response;GO:0009607//response to biotic stimulus;		>KAB1200111.1 Glucan endo-1,3-beta-glucosidase [Morella rubra]
CJ030_MR0G008974	-27.814	2.41876e-08	630.68	0	0	0	0	0	MYB_related	GO:0048046//apoplast;GO:0009507//chloroplast;GO:0009570//chloroplast stroma;GO:0005737//cytoplasm;GO:0005829//cytosol;GO:0009506//plasmodesma;GO:0005524//ATP binding;GO:0031956//medium-chain fatty acid-CoA ligase activity;GO:0050203//oxalate-CoA ligase activity;GO:0050832//defense response to fungus;GO:0006631//fatty acid metabolic process;GO:0033611//oxalate catabolic process;GO:0010030//positiv…	K22133//oxalate---CoA ligase [EC:6.2.1.8]+ko00630//Glyoxylate and dicarboxylate metabolism+ko01100//Metabolic pathways;	>KAB1199922.1 4-coumarate--CoA ligase-like 10 [Morella rubra]
CJ030_MR0G012591	1.41557	0.000200819	8.07	17.29	17.95	6.64	9.15	19.11	C3H	GO:0005829//cytosol;		>KAB1199839.1 putative WD repeat-containing protein C2A9.03 [Morella rubra] >KAB1205477.1 putative WD repeat-containing protein C2A9.03 [Morella rubra] >KAB1207430.1 putative WD repeat-containing protein C2A9.03 [Morella rubra]
CJ030_MR0G013901	-23.8535	1.3496e-06	36.77	0	0	0	0	0	ERF	GO:0005634//nucleus;GO:0003677//DNA binding;GO:0003700//DNA-binding transcription factor activity;GO:0009877//nodulation;GO:0006355//regulation of transcription, DNA-templated;		>KAB1199769.1 Ethylene-responsive transcription factor RAP2-11 [Morella rubra]
CJ030_MR1G008498	22.6659	5.28653e-06	0	48.87	0	0	0	0		GO:0031225//anchored component of membrane;GO:0046658//anchored component of plasma membrane;GO:0005886//plasma membrane;GO:0008289//lipid binding;GO:0042335//cuticle development;GO:0050832//defense response to fungus;GO:0006869//lipid transport;		>KAB1226653.1 Non-specific lipid transfer protein GPI-anchored 2 [Morella rubra]
CJ030_MR1G025247	-22.6606	5.28653e-06	28.81	0	0	0	0	0		GO:0016021//integral component of membrane;		>KAB1226030.1 hypothetical protein CJ030_MR1G025247 [Morella rubra]
CJ030_MR1G025248	-21.8786	3.75571e-08	19.55	0	0	0	0	0		GO:0016021//integral component of membrane;		>KAB1226031.1 hypothetical protein CJ030_MR1G025248 [Morella rubra]
CJ030_MR1G028619	-6.16467	0.0025527	0.79	0.07	0.22	0.56	42.02	0.19	NF-YA	GO:0009570//chloroplast stroma;GO:0009534//chloroplast thylakoid;GO:0016165//linoleate 13S-lipoxygenase activity;GO:0046872//metal ion binding;GO:0016702//oxidoreductase activity, acting on single donors with incorporation of molecular oxygen, incorporation of two atoms of oxygen;GO:0006633//fatty acid biosynthetic process;GO:0010597//green leaf volatile biosynthetic process;GO:0034440//lipid oxi…	K00454//lipoxygenase [EC:1.13.11.12]+ko00591//Linoleic acid metabolism+ko00592//alpha-Linolenic acid metabolism+ko01100//Metabolic pathways+ko01110//Biosynthesis of secondary metabolites;	>KAB1224769.1 Linoleate 13S-lipoxygenase 2-1, chloroplastic [Morella rubra]
CJ030_MR1G028635	-5.41452	0.0207065	1.05	0.2	0.5	0.81	52.16	0.19	NF-YA	GO:0009570//chloroplast stroma;GO:0009534//chloroplast thylakoid;GO:0016165//linoleate 13S-lipoxygenase activity;GO:0046872//metal ion binding;GO:0016702//oxidoreductase activity, acting on single donors with incorporation of molecular oxygen, incorporation of two atoms of oxygen;GO:0006633//fatty acid biosynthetic process;GO:0010597//green leaf volatile biosynthetic process;GO:0034440//lipid oxi…	K00454//lipoxygenase [EC:1.13.11.12]+ko00591//Linoleic acid metabolism+ko00592//alpha-Linolenic acid metabolism+ko01100//Metabolic pathways+ko01110//Biosynthesis of secondary metabolites;	>KAB1224785.1 Linoleate 13S-lipoxygenase 2-1, chloroplastic [Morella rubra]
CJ030_MR1G028636	-5.90088	0.0278047	0.86	0.23	0.42	0.75	54.07	0.17	ERF	GO:0009507//chloroplast;GO:0046872//metal ion binding;GO:0016702//oxidoreductase activity, acting on single donors with incorporation of molecular oxygen, incorporation of two atoms of oxygen;GO:0006633//fatty acid biosynthetic process;GO:0031408//oxylipin biosynthetic process;	K00454//lipoxygenase [EC:1.13.11.12]+ko00591//Linoleic acid metabolism+ko00592//alpha-Linolenic acid metabolism+ko01100//Metabolic pathways+ko01110//Biosynthesis of secondary metabolites;	>KAB1224786.1 Linoleate 13S-lipoxygenase 2-1, chloroplastic [Morella rubra]
CJ030_MR1G028663	-23.188	2.88165e-06	10.52	0	0	0	0	0		GO:0005737//cytoplasm;GO:0016607//nuclear speck;GO:0003723//RNA binding;GO:0006397//mRNA processing;	K14396//polyadenylate-binding protein 2+ko03015//mRNA surveillance pathway;	>KAB1224725.1 Polyadenylate-binding protein 2-A [Morella rubra] >KAB1224813.1 Polyadenylate-binding protein 2-A [Morella rubra]
CJ030_MR2G000184	-2.65334	0.0120485	39.47	3.08	1.94	18.66	46.21	8.57		GO:0016021//integral component of membrane;GO:0016020//membrane;GO:0090447//glycerol-3-phosphate 2-O-acyltransferase activity;GO:0016791//phosphatase activity;GO:0102419//sn-2-glycerol-3-phosphate omega-OH-C22:0-CoA acyl transferase activity;GO:0010143//cutin biosynthetic process;GO:0009908//flower development;GO:0008654//phospholipid biosynthetic process;	K13508//glycerol-3-phosphate acyltransferase [EC:2.3.1.15 2.3.1.198]+ko00561//Glycerolipid metabolism+ko00564//Glycerophospholipid metabolism+ko01100//Metabolic pathways+ko01110//Biosynthesis of secondary metabolites;	>KAB1224315.1 Glycerol-3-phosphate 2-O-acyltransferase 6 [Morella rubra]
CJ030_MR2G003985	-4.505	0.0171425	4.58	0	0.12	1.77	0.91	0.16		GO:0016021//integral component of membrane;		>KAB1201310.1 hypothetical protein CJ030_MR0G004285 [Morella rubra] >KAB1201340.1 hypothetical protein CJ030_MR0G004315 [Morella rubra]
CJ030_MR2G006704	-1.24818	0.0213021	32.28	11.13	10.88	27.12	44.45	14.92	C3H	GO:0005576//extracellular region;GO:0009505//plant-type cell wall;GO:0009506//plasmodesma;GO:0005773//vacuole;GO:0004185//serine-type carboxypeptidase activity;		>KAB1222170.1 Serine carboxypeptidase-like 45 [Morella rubra]
CJ030_MR2G011719	-6.6302	0.0117366	0.31	0	0	0.35	0.65	0	MYB_related	GO:0005524//ATP binding;GO:0004618//phosphoglycerate kinase activity;GO:0008176//tRNA (guanine-N7-)-methyltransferase activity;GO:0006096//glycolytic process;	K00927//phosphoglycerate kinase [EC:2.7.2.3]+ko00010//Glycolysis / Gluconeogenesis+ko00710//Carbon fixation in photosynthetic organisms+ko01100//Metabolic pathways+ko01110//Biosynthesis of secondary metabolites+ko01200//Carbon metabolism+ko01230//Biosynthesis of amino acids;	>KAB1223668.1 Phosphoglycerate kinase [Morella rubra]
CJ030_MR2G024092	-1.61419	0.012346	21.95	6.34	5.41	11.04	20.46	3.26	C2H2	GO:0016207//4-coumarate-CoA ligase activity;GO:0005524//ATP binding;GO:0016405//CoA-ligase activity;GO:0009698//phenylpropanoid metabolic process;	K01904//4-coumarate--CoA ligase [EC:6.2.1.12]+ko00130//Ubiquinone and other terpenoid-quinone biosynthesis+ko00940//Phenylpropanoid biosynthesis+ko01100//Metabolic pathways+ko01110//Biosynthesis of secondary metabolites;	>KAB1223617.1 4-coumarate--CoA ligase 2 [Morella rubra]
CJ030_MR2G024436	2.15249	0.037514	13.14	91.74	72.79	39.78	21.5	132.61		GO:0005737//cytoplasm;GO:0005524//ATP binding;GO:0016301//kinase activity;GO:0000287//magnesium ion binding;GO:0030955//potassium ion binding;GO:0004743//pyruvate kinase activity;GO:0006096//glycolytic process;	K00873//pyruvate kinase [EC:2.7.1.40]+ko00010//Glycolysis / Gluconeogenesis+ko00620//Pyruvate metabolism+ko01100//Metabolic pathways+ko01110//Biosynthesis of secondary metabolites+ko01200//Carbon metabolism+ko01230//Biosynthesis of amino acids;	>KAB1224159.1 Pyruvate kinase, cytosolic isozyme [Morella rubra] >KAB1224190.1 Pyruvate kinase, cytosolic isozyme [Morella rubra]
CJ030_MR3G009922	-2.31833	0.00107139	28.54	6.24	5.99	13.74	37.68	2.16		GO:0005618//cell wall;GO:0005576//extracellular region;GO:0005886//plasma membrane;GO:0016787//hydrolase activity;GO:0071555//cell wall organization;		>KAB1220462.1 hypothetical protein CJ030_MR3G009922 [Morella rubra]
CJ030_MR3G011165	-3.5987	0.012849	435.74	44.33	14.59	37.39	964.77	36.21				>KAB1219575.1 Glycine-rich protein DC7.1 [Morella rubra]
CJ030_MR3G015750	-3.54686	0.00278644	4.24	0.13	0.3	1.7	2.9	0.23	G2-like	GO:0016021//integral component of membrane;GO:0106144//fraxetin 5-hydroxylase activity;GO:0020037//heme binding;GO:0005506//iron ion binding;GO:0004497//monooxygenase activity;GO:0071281//cellular response to iron ion;GO:0098542//defense response to other organism;GO:0010039//response to iron ion;GO:0106146//sideretin biosynthesis;	K23136//fraxetin 5-hydroxylase [EC:1.14.14.164]+ko00999//Biosynthesis of various plant secondary metabolites+ko01110//Biosynthesis of secondary metabolites;	>KAB1220497.1 Cytochrome P450 82C4 [Morella rubra]
CJ030_MR4G001508	-20.6844	6.26494e-05	10.3	0	0	0	0	0	bHLH	GO:0005783//endoplasmic reticulum;GO:0016021//integral component of membrane;GO:0005886//plasma membrane;GO:0020037//heme binding;GO:0005506//iron ion binding;GO:0004497//monooxygenase activity;GO:0016705//oxidoreductase activity, acting on paired donors, with incorporation or reduction of molecular oxygen;GO:0009809//lignin biosynthetic process;GO:0009699//phenylpropanoid biosynthetic process;GO…	K09755//ferulate-5-hydroxylase [EC:1.14.-.-]+ko00940//Phenylpropanoid biosynthesis+ko01100//Metabolic pathways+ko01110//Biosynthesis of secondary metabolites;	>KAB1216675.1 Cytochrome P450 84A1 [Morella rubra]
CJ030_MR4G002209	-22.7223	5.21752e-06	0	0	0	0	35.06	0		GO:0005829//cytosol;		>KAB1216551.1 28 kDa heat- and acid-stable phosphoprotein [Morella rubra]
CJ030_MR4G004176	-21.3553	1.10133e-07	0	0	0	0	4.32	0		GO:0005739//mitochondrion;		>KAB1215242.1 putative serine/threonine-protein kinase abkC [Morella rubra]
CJ030_MR4G008729	-1.37011	0.026419	26.22	6.7	6.03	17.48	19.02	8.21	NF-YC	GO:0016021//integral component of membrane;GO:0016020//membrane;		>KAB1217471.1 putative transporter MCH1 [Morella rubra]
CJ030_MR4G020440	-22.6426	5.28653e-06	18.21	0	0	0	0	0				>KAB1215730.1 Poly(U)-specific endoribonuclease-B [Morella rubra]
CJ030_MR4G025839	-1.62646	0.00214777	21.11	5.26	7.43	18.4	26.62	5.47		GO:0009507//chloroplast;GO:0009535//chloroplast thylakoid membrane;GO:0042651//thylakoid membrane;GO:0046872//metal ion binding;GO:0004659//prenyltransferase activity;GO:0043693//monoterpene biosynthetic process;	K13789//geranylgeranyl diphosphate synthase, type II [EC:2.5.1.1 2.5.1.10 2.5.1.29]+ko00900//Terpenoid backbone biosynthesis+ko01100//Metabolic pathways+ko01110//Biosynthesis of secondary metabolites;	>KAB1215193.1 Heterodimeric geranylgeranyl pyrophosphate synthase large subunit 1, chloroplastic [Morella rubra]
CJ030_MR4G029050	-21.3447	1.31734e-07	1.59	0	0	0	0	0	NAC	GO:0005737//cytoplasm;GO:0005634//nucleus;GO:0043531//ADP binding;GO:0050135//NAD(P)+ nucleosidase activity;GO:0061809//NAD+ nucleotidase, cyclic ADP-ribose generating;GO:0042803//protein homodimerization activity;GO:0050832//defense response to fungus;GO:0043068//positive regulation of programmed cell death;GO:0007165//signal transduction;	K00695//sucrose synthase [EC:2.4.1.13]+ko00500//Starch and sucrose metabolism+ko01100//Metabolic pathways+ko01110//Biosynthesis of secondary metabolites;	>KAB1216444.1 TMV resistance protein N [Morella rubra]
CJ030_MR5G000977	-5.62676	0.00127945	22.83	0.28	0.1	0.21	25.57	0.28	NAC	GO:0005634//nucleus;GO:0003729//mRNA binding;GO:0006397//mRNA processing;		>KAB1211916.1 Oligouridylate-binding protein 1B [Morella rubra] >KAB1218331.1 Oligouridylate-binding protein 1B [Morella rubra]
CJ030_MR5G004902	-6.83609	0.00514193	3.37	0	0	1.38	2.35	0.05	bHLH	GO:0046872//metal ion binding;GO:0061630//ubiquitin protein ligase activity;GO:0009908//flower development;GO:0043161//proteasome-mediated ubiquitin-dependent protein catabolic process;GO:0040008//regulation of growth;GO:0010228//vegetative to reproductive phase transition of meristem;		>KAB1214751.1 E3 ubiquitin ligase BIG BROTHER [Morella rubra]
CJ030_MR5G022109	21.1068	9.92217e-08	0	9.53	0	0	0	0		GO:0005737//cytoplasm;GO:0016868//intramolecular transferase activity, phosphotransferases;GO:0016791//phosphatase activity;	K15634//2,3-bisphosphoglycerate-dependent phosphoglycerate mutase [EC:5.4.2.11]+ko00010//Glycolysis / Gluconeogenesis+ko00260//Glycine, serine and threonine metabolism+ko01100//Metabolic pathways+ko01110//Biosynthesis of secondary metabolites+ko01200//Carbon metabolism+ko01230//Biosynthesis of amino acids;	>KAB1214660.1 putative phosphoglycerate mutase GpmB [Morella rubra]
CJ030_MR5G023115	1.87866	0.0211424	4.12	17.58	10.94	6.22	3.54	17.18		GO:0005737//cytoplasm;GO:0016768//spermine synthase activity;GO:0010487//thermospermine synthase activity;GO:0009926//auxin polar transport;GO:0010087//phloem or xylem histogenesis;GO:0006596//polyamine biosynthetic process;GO:0048759//xylem vessel member cell differentiation;		>KAB1214202.1 Thermospermine synthase ACAULIS5 [Morella rubra]
CJ030_MR6G013360	21.542	2.08975e-05	0	6.43	0	0	0	0	CAMTA	GO:0005634//nucleus;GO:0005516//calmodulin binding;GO:0003700//DNA-binding transcription factor activity;GO:0003690//double-stranded DNA binding;GO:0043565//sequence-specific DNA binding;GO:0003712//transcription coregulator activity;GO:0070417//cellular response to cold;GO:0042742//defense response to bacterium;GO:0050832//defense response to fungus;GO:0010150//leaf senescence;GO:1900367//positi…		>KAB1210236.1 Calmodulin-binding transcription activator 3 [Morella rubra]
CJ030_MR6G018030	23.4404	2.10657e-06	0	0	29.88	0	0	0	NAC	GO:0005737//cytoplasm;GO:0005829//cytosol;GO:0005886//plasma membrane;GO:0003729//mRNA binding;GO:0046719//regulation by virus of viral protein levels in host cell;GO:0010468//regulation of gene expression;GO:0008380//RNA splicing;		>KAB1211044.1 RNA-binding protein Nova-1 [Morella rubra] >KAB1219000.1 RNA-binding protein Nova-1 [Morella rubra]
CJ030_MR6G019702	-22.3793	7.14285e-06	21.34	0	0	0	0	0	NAC	GO:0005737//cytoplasm;GO:0005739//mitochondrion;GO:0016629//12-oxophytodienoate reductase activity;GO:0010181//FMN binding;GO:0016491//oxidoreductase activity;GO:0006633//fatty acid biosynthetic process;GO:0009695//jasmonic acid biosynthetic process;GO:0031408//oxylipin biosynthetic process;GO:0009611//response to wounding;	K05894//12-oxophytodienoic acid reductase [EC:1.3.1.42]+ko00592//alpha-Linolenic acid metabolism+ko01100//Metabolic pathways+ko01110//Biosynthesis of secondary metabolites;	>KAB1210907.1 12-oxophytodienoate reductase 2 [Morella rubra] >KAB1210920.1 12-oxophytodienoate reductase 2 [Morella rubra]
CJ030_MR6G024807	-1.14885	0.048881	36.53	16.91	11.16	24.93	38.7	11.01		GO:0005576//extracellular region;GO:0016297//acyl-[acyl-carrier-protein] hydrolase activity;GO:0016042//lipid catabolic process;		>KAB1208771.1 hypothetical protein CJ030_MR6G024807 [Morella rubra]
CJ030_MR7G000357	6.46193	0.00778598	1.04	46.8	16.51	0	0	12.09	bZIP	GO:0005840//ribosome;GO:0003735//structural constituent of ribosome;GO:0006412//translation;	K02866//large subunit ribosomal protein L10e+ko03010//Ribosome;	>KAB1201708.1 60S ribosomal protein L10 [Morella rubra] >KAB1207669.1 60S ribosomal protein L10 [Morella rubra]
CJ030_MR7G001377	21.7943	1.4805e-05	0.02	16.69	0	0	0	0.02	DBB	GO:0005783//endoplasmic reticulum;GO:0005886//plasma membrane;GO:0004252//serine-type endopeptidase activity;GO:0010074//maintenance of meristem identity;GO:0040008//regulation of growth;		>KAB1208403.1 Subtilisin-like protease [Morella rubra]
CJ030_MR7G007723	20.7751	2.31071e-07	0	10.96	0	0	0	0		GO:0005737//cytoplasm;GO:0005634//nucleus;GO:0003723//RNA binding;GO:0006397//mRNA processing;	K12839//survival of motor neuron-related-splicing factor 30+ko03040//Spliceosome;	>KAB1208625.1 Survival of motor neuron-related-splicing factor 30 [Morella rubra] >KAB1208627.1 Survival of motor neuron-related-splicing factor 30 [Morella rubra]
CJ030_MR7G010019	-6.60594	0.00521568	86.42	0	0.72	1.79	4.1	0.18	B3	GO:0016021//integral component of membrane;GO:0097008//(3E)-4,8-dimethyl-1,3,7-nonatriene synthase activity;GO:0097007//4,8,12-trimethyltrideca-1,3,7,11-tetraene synthase activity;GO:0102171//DMNT synthase activity;GO:0020037//heme binding;GO:0005506//iron ion binding;GO:0050832//defense response to fungus;GO:0002213//defense response to insect;GO:0098542//defense response to other organism;GO:19…	K17961//trimethyltridecatetraene/dimethylnonatriene synthase [EC:1.14.14.58 1.14.14.59]+ko00904//Diterpenoid biosynthesis+ko01110//Biosynthesis of secondary metabolites;	>KAB1207783.1 Cytochrome P450 82G1 [Morella rubra]
CJ030_MR7G010582	1.41557	0.000200819	8.07	17.29	17.95	6.64	9.15	19.11	C3H			>KAB1199839.1 putative WD repeat-containing protein C2A9.03 [Morella rubra] >KAB1205477.1 putative WD repeat-containing protein C2A9.03 [Morella rubra] >KAB1207430.1 putative WD repeat-containing protein C2A9.03 [Morella rubra]
CJ030_MR7G010604	-2.59168	0.000115346	4.18	0.54	0.97	3.78	8.35	0.73		GO:0016021//integral component of membrane;GO:0008271//secondary active sulfate transmembrane transporter activity;		>KAB1205455.1 Low affinity sulfate transporter 3 [Morella rubra]
CJ030_MR7G012046	-21.4773	9.92217e-08	27.43	0	0	0	0	0		GO:0031225//anchored component of membrane;GO:0005886//plasma membrane;GO:0009536//plastid;GO:0090406//pollen tube;GO:0045927//positive regulation of growth;	K11584//serine/threonine-protein phosphatase 2A regulatory subunit B'+ko03015//mRNA surveillance pathway;	>KAB1205318.1 GPI-anchored protein LORELEI [Morella rubra]
CJ030_MR7G012526	1.41557	0.000200819	8.07	17.29	17.95	6.64	9.15	19.11	C3H			>KAB1199839.1 putative WD repeat-containing protein C2A9.03 [Morella rubra] >KAB1205477.1 putative WD repeat-containing protein C2A9.03 [Morella rubra] >KAB1207430.1 putative WD repeat-containing protein C2A9.03 [Morella rubra]
CJ030_MR7G012988	-21.8097	3.75571e-08	3.06	0	0	0	0	0	Trihelix	GO:0016021//integral component of membrane;GO:0016020//membrane;GO:0005886//plasma membrane;GO:0005524//ATP binding;GO:0033612//receptor serine/threonine kinase binding;GO:0005102//signaling receptor binding;GO:0009553//embryo sac development;GO:0048481//plant ovule development;GO:0010103//stomatal complex morphogenesis;	K20718//LRR receptor-like serine/threonine-protein kinase ERECTA [EC:2.7.11.1]+ko04016//MAPK signaling pathway - plant;	>KAB1208155.1 LRR receptor-like serine/threonine-protein kinase ERL1 [Morella rubra] >KAB1210808.1 LRR receptor-like serine/threonine-protein kinase ERL1 [Morella rubra]
CJ030_MR7G014368	20.7891	2.34504e-07	0	0	0	0	0	8.86		GO:0009507//chloroplast;GO:0009534//chloroplast thylakoid;GO:0005829//cytosol;GO:0009536//plastid;GO:0010307//acetylglutamate kinase regulator activity;GO:0005524//ATP binding;GO:0030234//enzyme regulator activity;GO:0000287//magnesium ion binding;GO:0009718//anthocyanin-containing compound biosynthetic process;GO:0006807//nitrogen compound metabolic process;GO:2000013//regulation of arginine bio…		>KAB1206195.1 hypothetical protein CJ030_MR7G014340 [Morella rubra] >KAB1206223.1 hypothetical protein CJ030_MR7G014368 [Morella rubra]
CJ030_MR7G014377	-21.663	6.39955e-08	9.4	0	0	0	0	0	bHLH	GO:0016021//integral component of membrane;GO:0005886//plasma membrane;GO:0005516//calmodulin binding;GO:0030552//cAMP binding;GO:0030553//cGMP binding;GO:0005216//ion channel activity;	K05391//cyclic nucleotide gated channel, plant+ko04626//Plant-pathogen interaction;	>KAB1206232.1 Cyclic nucleotide-gated ion channel 1 [Morella rubra]
CJ030_MR7G014383	-23.8927	1.34651e-06	22.56	0	0	0	0	0	bHLH	GO:0016021//integral component of membrane;GO:0005886//plasma membrane;GO:0005516//calmodulin binding;GO:0030552//cAMP binding;GO:0030553//cGMP binding;GO:0005216//ion channel activity;	K05391//cyclic nucleotide gated channel, plant+ko04626//Plant-pathogen interaction;	>KAB1206238.1 Cyclic nucleotide-gated ion channel 1 [Morella rubra]
CJ030_MR7G014393	-5.94311	0.000115346	11.72	0.07	0.1	0.35	5.73	0.09		GO:0016021//integral component of membrane;GO:0005886//plasma membrane;GO:0005516//calmodulin binding;GO:0030552//cAMP binding;GO:0030553//cGMP binding;GO:0005216//ion channel activity;	K05391//cyclic nucleotide gated channel, plant+ko04626//Plant-pathogen interaction;	>KAB1206248.1 hypothetical protein CJ030_MR7G014393 [Morella rubra]
CJ030_MR7G015304	8.80002	0.0020057	0.06	2.68	0.38	0.1	0	22.5				>KAB1204863.1 hypothetical protein CJ030_MR7G015304 [Morella rubra] >KAB1204874.1 hypothetical protein CJ030_MR7G015292 [Morella rubra]
CJ030_MR8G002107	22.7961	4.8318e-06	0	0	22.58	0	0	0				>KAB1203993.1 hypothetical protein CJ030_MR8G002112 [Morella rubra]
CJ030_MR8G020204	-1.49351	0.0207065	33.55	10.92	6.98	15.57	35.09	7.45		GO:0047918//GDP-mannose 3,5-epimerase activity;GO:0051287//NAD binding;GO:0019853//L-ascorbic acid biosynthetic process;	K10046//GDP-D-mannose 3', 5'-epimerase [EC:5.1.3.18 5.1.3.-]+ko00053//Ascorbate and aldarate metabolism+ko00520//Amino sugar and nucleotide sugar metabolism+ko01100//Metabolic pathways+ko01110//Biosynthesis of secondary metabolites+ko01240//Biosynthesis of cofactors+ko01250//Biosynthesis of nucleotide sugars;	>KAB1202870.1 GDP-mannose 3,5-epimerase 1 [Morella rubra]
CJ030_MR8G027695	1.47096	0.00160329	79.89	267.48	276.09	117.46	112.84	210.89		GO:0005886//plasma membrane;GO:0046872//metal ion binding;GO:0061630//ubiquitin protein ligase activity;GO:0009630//gravitropism;GO:0016567//protein ubiquitination;GO:0048364//root development;		>KAB1203840.1 hypothetical protein CJ030_MR8G027695 [Morella rubra]
XLOC_002005	-4.91607	0.00117195	319.87	1.65	6.58	6.38	147.29	4.38	MYB_related	GO:0008289//lipid binding;GO:0006869//lipid transport;		>KAB1225673.1 Non-specific lipid-transfer protein [Morella rubra] >KAB1225674.1 Non-specific lipid-transfer protein [Morella rubra] >KAB1225678.1 Non-specific lipid-transfer protein [Morella rubra]
XLOC_005534	-21.9055	1.32275e-05	7.65	0	0	0	0	0	C2H2	GO:0005737//cytoplasm;GO:0008270//zinc ion binding;	K12501//homogentisate solanesyltransferase [EC:2.5.1.117]+ko00130//Ubiquinone and other terpenoid-quinone biosynthesis+ko01100//Metabolic pathways+ko01110//Biosynthesis of secondary metabolites+ko01240//Biosynthesis of cofactors;	>KAB1222439.1 hypothetical protein CJ030_MR2G028767 [Morella rubra] >KAB1222442.1 hypothetical protein CJ030_MR2G028770 [Morella rubra]
XLOC_005750	-3.14348	0.012346	20.54	2.57	0.81	6.43	9.73	0.37		GO:0016021//integral component of membrane;GO:0016020//membrane;GO:0090447//glycerol-3-phosphate 2-O-acyltransferase activity;GO:0004366//glycerol-3-phosphate O-acyltransferase activity;GO:0016791//phosphatase activity;GO:0102420//sn-1-glycerol-3-phosphate C16:0-DCA-CoA acyl transferase activity;GO:0016024//CDP-diacylglycerol biosynthetic process;GO:0010143//cutin biosynthetic process;	K13508//glycerol-3-phosphate acyltransferase [EC:2.3.1.15 2.3.1.198]+ko00561//Glycerolipid metabolism+ko00564//Glycerophospholipid metabolism+ko01100//Metabolic pathways+ko01110//Biosynthesis of secondary metabolites;	>KAB1222933.1 putative glycerol-3-phosphate acyltransferase 3 [Morella rubra]
XLOC_008387	9.49242	9.92217e-08	0	3.3	0.68	0	0	2.7		GO:0005737//cytoplasm;GO:0016021//integral component of membrane;GO:0005886//plasma membrane;GO:0005096//GTPase activator activity;GO:0045159//myosin II binding;GO:0019905//syntaxin binding;GO:0017157//regulation of exocytosis;GO:0016192//vesicle-mediated transport;		>KAB1217625.1 Syntaxin-binding protein 5-like [Morella rubra] >KAB1217694.1 Syntaxin-binding protein 5-like [Morella rubra]
XLOC_011273	21.3471	2.57285e-05	0	0	0	0	0	5.81	MYB_related	GO:0005634//nucleus;GO:0005524//ATP binding;GO:0061631//ubiquitin conjugating enzyme activity;GO:0000209//protein polyubiquitination;GO:0006511//ubiquitin-dependent protein catabolic process;	K06689//ubiquitin-conjugating enzyme E2 D [EC:2.3.2.23]+ko04120//Ubiquitin mediated proteolysis+ko04141//Protein processing in endoplasmic reticulum;	>KAF3973794.1 hypothetical protein CMV_002819 [Castanea mollissima]
XLOC_012279	-23.1842	2.88165e-06	13.91	0	0	0	0	0	C2H2	GO:0005829//cytosol;GO:0005759//mitochondrial matrix;GO:0016740//transferase activity;GO:0016226//iron-sulfur cluster assembly;		>KAB1217079.1 hypothetical protein CJ030_MR4G021242 [Morella rubra] >KAB1217087.1 hypothetical protein CJ030_MR4G021234 [Morella rubra] >KAB1217096.1 hypothetical protein CJ030_MR4G021225 [Morella rubra]
XLOC_015421	22.8848	4.39013e-06	0	0	16.51	0	0	0		GO:0005783//endoplasmic reticulum;GO:0016021//integral component of membrane;GO:0005385//zinc ion transmembrane transporter activity;GO:0006882//cellular zinc ion homeostasis;GO:0071577//zinc ion transmembrane transport;		>KAB8643108.1 hypothetical protein FH972_026104 [Carpinus fangiana]
XLOC_016278	22.4148	7.14285e-06	0	25.98	0	0	0	0		GO:0005829//cytosol;GO:0005634//nucleus;GO:0004197//cysteine-type endopeptidase activity;GO:0004843//thiol-dependent ubiquitin-specific protease activity;GO:0016579//protein deubiquitination;GO:0006511//ubiquitin-dependent protein catabolic process;		>KAB1210235.1 Ubiquitin carboxyl-terminal hydrolase 4 [Morella rubra]
XLOC_016549	21.3727	2.55679e-05	0	0	12.05	0	0	0		GO:0005737//cytoplasm;GO:0005634//nucleus;GO:0051879//Hsp90 protein binding;GO:0008270//zinc ion binding;GO:0042742//defense response to bacterium;GO:0050832//defense response to fungus;GO:0009626//plant-type hypersensitive response;GO:0050821//protein stabilization;GO:0002679//respiratory burst involved in defense response;	K13458//disease resistance protein+ko04626//Plant-pathogen interaction;	>XP_041002755.1 cysteine and histidine-rich domain-containing protein RAR1 [Juglans microcarpa x Juglans regia]
XLOC_018346	-3.21714	0.00264262	8.78	1.49	0.56	5.58	9.74	0.34	MYB	GO:0031225//anchored component of membrane;GO:0046658//anchored component of plasma membrane;GO:0005886//plasma membrane;GO:0009536//plastid;GO:0005773//vacuole;GO:0009055//electron transfer activity;		>KAB1211474.1 Lamin-like protein [Morella rubra] >KAB1211477.1 Lamin-like protein [Morella rubra]
XLOC_018794	21.8889	1.32275e-05	0	0	14.28	0	0.03	0		GO:0005783//endoplasmic reticulum;GO:0005789//endoplasmic reticulum membrane;GO:0016021//integral component of membrane;GO:0080132//fatty acid alpha-hydroxylase activity;GO:0005506//iron ion binding;GO:0102771//sphingolipid very long chain fatty acid alpha-hydroxylase activity;GO:0006633//fatty acid biosynthetic process;GO:0006631//fatty acid metabolic process;GO:0000038//very long-chain fatty ac…		>KAB1199830.1 Fatty acid 2-hydroxylase 1 [Morella rubra] >KAB1205468.1 Fatty acid 2-hydroxylase 1 [Morella rubra] >KAB1207439.1 Fatty acid 2-hydroxylase 1 [Morella rubra]
XLOC_021502	1.02131	0.018908	36.68	81.79	54.83	28.43	46.74	56.6	C3H	GO:0005829//cytosol;		>KAB1199839.1 putative WD repeat-containing protein C2A9.03 [Morella rubra] >KAB1205477.1 putative WD repeat-containing protein C2A9.03 [Morella rubra] >KAB1207430.1 putative WD repeat-containing protein C2A9.03 [Morella rubra]
XLOC_021848	-22.3864	7.14285e-06	9.78	0	0	0	0	0				>KAB1208179.1 Pheophytinase, chloroplastic [Morella rubra] >KAB1210834.1 Pheophytinase, chloroplastic [Morella rubra]
XLOC_022921	-22.2988	7.80293e-06	5.89	0	0	0	0	0	HSF	GO:0005524//ATP binding;GO:0004672//protein kinase activity;		>KAB1203336.1 putative protein phosphatase 2C 51 [Morella rubra] >KAB1203344.1 putative protein phosphatase 2C 51 [Morella rubra]
XLOC_023757	-4.36282	0.00699949	5.35	1.02	0.66	3.37	61.67	1.02	bHLH	GO:0090575//RNA polymerase II transcription factor complex;GO:0003700//DNA-binding transcription factor activity;GO:0000981//DNA-binding transcription factor activity, RNA polymerase II-specific;GO:0046983//protein dimerization activity;GO:0000977//RNA polymerase II regulatory region sequence-specific DNA binding;GO:0050832//defense response to fungus;GO:0006357//regulation of transcription by RN…		>KAB1201846.1 hypothetical protein CJ030_MR8G004382 [Morella rubra] >KAB1201856.1 hypothetical protein CJ030_MR8G004392 [Morella rubra]
XLOC_024001	21.3687	2.55679e-05	0	5.84	0	0	0	0	GRAS	GO:0005737//cytoplasm;GO:0005634//nucleus;GO:0010331//gibberellin binding;GO:0016787//hydrolase activity;GO:0048444//floral organ morphogenesis;GO:0048530//fruit morphogenesis;GO:0010476//gibberellin mediated signaling pathway;GO:0010629//negative regulation of gene expression;GO:0009939//positive regulation of gibberellic acid mediated signaling pathway;GO:0010325//raffinose family oligosacchari…	K14493//gibberellin receptor GID1 [EC:3.-.-.-]+ko04075//Plant hormone signal transduction;	>KAB1202336.1 Gibberellin receptor GID1C [Morella rubra]
XLOC_025067	-21.3746	1.10133e-07	4.77	0	0	0	0	0	MYB	GO:0005829//cytosol;GO:0005730//nucleolus;GO:0005634//nucleus;GO:0009506//plasmodesma;GO:0005524//ATP binding;GO:0016887//ATPase activity;GO:0003690//double-stranded DNA binding;GO:0003725//double-stranded RNA binding;GO:0003729//mRNA binding;GO:0003723//RNA binding;GO:0003724//RNA helicase activity;GO:0003727//single-stranded RNA binding;GO:0006397//mRNA processing;GO:0051028//mRNA transport;GO:…	K12812//ATP-dependent RNA helicase UAP56/SUB2 [EC:3.6.4.13]+ko03013//Nucleocytoplasmic transport+ko03015//mRNA surveillance pathway+ko03040//Spliceosome;	>XP_018822222.1 DEAD-box ATP-dependent RNA helicase 15 [Juglans regia] >XP_041019589.1 DEAD-box ATP-dependent RNA helicase 15 [Juglans microcarpa x Juglans regia] >KAF5456721.1 hypothetical protein F2P56_026168 [Juglans regia]
XLOC_026060	-23.7762	1.44293e-06	13.68	0	0	0	0	0	Nin-like	GO:0005634//nucleus;GO:0001046//core promoter sequence-specific DNA binding;GO:0003700//DNA-binding transcription factor activity;GO:0000976//transcription regulatory region sequence-specific DNA binding;GO:0042128//nitrate assimilation;GO:0010167//response to nitrate;GO:0009414//response to water deprivation;GO:0010118//stomatal movement;		>KAB1201136.1 Protein NLP7 [Morella rubra] >KAB1201139.1 Protein NLP7 [Morella rubra]
XLOC_026261	20.8478	1.56595e-07	0	4.98	0	0	0	0		GO:0008278//cohesin complex;GO:0005634//nucleus;GO:0005524//ATP binding;GO:0016887//ATPase activity;GO:0003677//DNA binding;GO:0051301//cell division;GO:0007059//chromosome segregation;GO:0006281//DNA repair;GO:0051321//meiotic cell cycle;GO:0007064//mitotic sister chromatid cohesion;GO:0007062//sister chromatid cohesion;		>KAG2719149.1 hypothetical protein I3760_03G256200 [Carya illinoinensis]
XLOC_026323	21.0956	9.92217e-08	0	0	5.32	0	0	0	C2H2	GO:0008270//zinc ion binding;		>KAB1200878.1 Zinc finger AN1 and C2H2 domain-containing stress-associated protein 16 [Morella rubra]
XLOC_028117	-22.0979	1.02897e-05	4.64	0	0	0	0	0	TCP	GO:0009897//external side of plasma membrane;GO:0016021//integral component of membrane;GO:0005634//nucleus;GO:0005886//plasma membrane;GO:0005524//ATP binding;GO:0042626//ATPase activity, coupled to transmembrane movement of substances;GO:0015562//efflux transmembrane transporter activity;GO:0015245//fatty acid transmembrane transporter activity;GO:0042803//protein homodimerization activity;GO:0…		>KAB1199046.1 ABC transporter G family member 11 [Morella rubra] >KAB1199047.1 ABC transporter G family member 11 [Morella rubra]

## Sheet: Sheet1
Gene ID	log2(Treat3/CK)	Qvalue(CK-vs-Treat3)	ck_3 FPKM	F_2 FPKM	F_1 FPKM	ck_2 FPKM	ck_1 FPKM	F_3 FPKM	TFs	GO	Kegg Orthology	Nr
CJ030_MR0G000309	2.73138	5.88598e-05	3.01	9.26	17.05	1.98	2.72	19.79		GO:0005783//endoplasmic reticulum;GO:0005789//endoplasmic reticulum membrane;GO:0016021//integral component of membrane;GO:0005634//nucleus;GO:0005886//plasma membrane;GO:0000247//C-8 sterol isomerase activity;GO:0047750//cholestenol delta-isomerase activity;GO:0004769//steroid delta-isomerase activity;GO:0016126//sterol biosynthetic process;	K01824//cholestenol Delta-isomerase [EC:5.3.3.5]+ko00100//Steroid biosynthesis+ko01100//Metabolic pathways+ko01110//Biosynthesis of secondary metabolites;	>KAB1201693.1 putative 3-beta-hydroxysteroid-Delta(8),Delta(7)-isomerase [Morella rubra] >KAB1207684.1 putative 3-beta-hydroxysteroid-Delta(8),Delta(7)-isomerase [Morella rubra]
CJ030_MR0G004419	-21.4371	1.02073e-07	2.38	0	0	0	0	0	C2H2	GO:0005681//spliceosomal complex;GO:0005524//ATP binding;GO:0016787//hydrolase activity;GO:0003723//RNA binding;GO:0003724//RNA helicase activity;GO:0009793//embryo development ending in seed dormancy;GO:0006397//mRNA processing;GO:0008380//RNA splicing;	K12813//pre-mRNA-splicing factor ATP-dependent RNA helicase DHX16 [EC:3.6.4.13]+ko03040//Spliceosome;	>KAB1201290.1 putative pre-mRNA-splicing factor ATP-dependent RNA helicase DHX16 [Morella rubra] >KAB1201299.1 putative pre-mRNA-splicing factor ATP-dependent RNA helicase DHX16 [Morella rubra]
CJ030_MR0G004644	-6.66464	0.0243746	0.21	0	0	0.15	0.62	0		GO:0016604//nuclear body;GO:0005730//nucleolus;GO:0005634//nucleus;GO:0005666//RNA polymerase III complex;GO:0000419//RNA polymerase V complex;GO:0003677//DNA binding;GO:0003899//DNA-directed 5'-3' RNA polymerase activity;GO:0046872//metal ion binding;GO:0050832//defense response to fungus;GO:0006306//DNA methylation;GO:0035194//posttranscriptional gene silencing by RNA;GO:0030422//production of …	K16251//DNA-directed RNA polymerase V subunit 1 [EC:2.7.7.6]+ko03020//RNA polymerase;	>KAB1201212.1 DNA-directed RNA polymerase V subunit 1 [Morella rubra] >KAB1201219.1 DNA-directed RNA polymerase V subunit 1 [Morella rubra]
CJ030_MR0G004661	1.68835	0.0357246	7.39	22.07	35.57	10.24	9.02	17.09	HSF	GO:0005789//endoplasmic reticulum membrane;GO:0016021//integral component of membrane;GO:0020037//heme binding;GO:0005506//iron ion binding;GO:0004497//monooxygenase activity;GO:0016705//oxidoreductase activity, acting on paired donors, with incorporation or reduction of molecular oxygen;GO:0006952//defense response;GO:0006587//serotonin biosynthetic process from tryptophan;	K24541//tryptamine 5-hydroxylase [EC:1.14.-.-]+ko00380//Tryptophan metabolism+ko01100//Metabolic pathways+ko01110//Biosynthesis of secondary metabolites;	>KAB1201180.1 Cytochrome P450 71A9 [Morella rubra] >KAB1201183.1 Cytochrome P450 71A9 [Morella rubra]
CJ030_MR0G004662	23.5975	1.72408e-06	0	0	110.99	0	0	0	MYB_related	GO:0009507//chloroplast;GO:0009408//response to heat;	K13993//HSP20 family protein+ko04141//Protein processing in endoplasmic reticulum;	>KAB1201181.1 Small heat shock protein, chloroplastic [Morella rubra] >KAB1201182.1 Small heat shock protein, chloroplastic [Morella rubra]
CJ030_MR0G004663	23.5975	1.72408e-06	0	0	110.99	0	0	0	MYB_related	GO:0009507//chloroplast;GO:0009408//response to heat;	K13993//HSP20 family protein+ko04141//Protein processing in endoplasmic reticulum;	>KAB1201181.1 Small heat shock protein, chloroplastic [Morella rubra] >KAB1201182.1 Small heat shock protein, chloroplastic [Morella rubra]
CJ030_MR0G004664	1.68835	0.0357246	7.39	22.07	35.57	10.24	9.02	17.09	HSF	GO:0005789//endoplasmic reticulum membrane;GO:0016021//integral component of membrane;GO:0020037//heme binding;GO:0005506//iron ion binding;GO:0004497//monooxygenase activity;GO:0016705//oxidoreductase activity, acting on paired donors, with incorporation or reduction of molecular oxygen;GO:0006952//defense response;GO:0006587//serotonin biosynthetic process from tryptophan;	K24541//tryptamine 5-hydroxylase [EC:1.14.-.-]+ko00380//Tryptophan metabolism+ko01100//Metabolic pathways+ko01110//Biosynthesis of secondary metabolites;	>KAB1201180.1 Cytochrome P450 71A9 [Morella rubra] >KAB1201183.1 Cytochrome P450 71A9 [Morella rubra]
CJ030_MR0G006613	-4.83009	0.0203486	5.63	1.16	0.11	1.66	49.37	0.32				>KAB1200684.1 Protein E6 [Morella rubra]
CJ030_MR0G008028	-7.95924	0.000695273	1.78	0.09	0	1.31	56.44	0.09	FAR1	GO:0042973//glucan endo-1,3-beta-D-glucosidase activity;GO:0005975//carbohydrate metabolic process;GO:0006952//defense response;GO:0009607//response to biotic stimulus;		>KAB1200111.1 Glucan endo-1,3-beta-glucosidase [Morella rubra]
CJ030_MR0G008974	-27.814	2.41876e-08	630.68	0	0	0	0	0	MYB_related	GO:0048046//apoplast;GO:0009507//chloroplast;GO:0009570//chloroplast stroma;GO:0005737//cytoplasm;GO:0005829//cytosol;GO:0009506//plasmodesma;GO:0005524//ATP binding;GO:0031956//medium-chain fatty acid-CoA ligase activity;GO:0050203//oxalate-CoA ligase activity;GO:0050832//defense response to fungus;GO:0006631//fatty acid metabolic process;GO:0033611//oxalate catabolic process;GO:0010030//positiv…	K22133//oxalate---CoA ligase [EC:6.2.1.8]+ko00630//Glyoxylate and dicarboxylate metabolism+ko01100//Metabolic pathways;	>KAB1199922.1 4-coumarate--CoA ligase-like 10 [Morella rubra]
CJ030_MR0G012591	1.41557	0.000200819	8.07	17.29	17.95	6.64	9.15	19.11	C3H	GO:0005829//cytosol;		>KAB1199839.1 putative WD repeat-containing protein C2A9.03 [Morella rubra] >KAB1205477.1 putative WD repeat-containing protein C2A9.03 [Morella rubra] >KAB1207430.1 putative WD repeat-containing protein C2A9.03 [Morella rubra]
CJ030_MR0G013901	-23.8535	1.3496e-06	36.77	0	0	0	0	0	ERF	GO:0005634//nucleus;GO:0003677//DNA binding;GO:0003700//DNA-binding transcription factor activity;GO:0009877//nodulation;GO:0006355//regulation of transcription, DNA-templated;		>KAB1199769.1 Ethylene-responsive transcription factor RAP2-11 [Morella rubra]
CJ030_MR1G008498	22.6659	5.28653e-06	0	48.87	0	0	0	0		GO:0031225//anchored component of membrane;GO:0046658//anchored component of plasma membrane;GO:0005886//plasma membrane;GO:0008289//lipid binding;GO:0042335//cuticle development;GO:0050832//defense response to fungus;GO:0006869//lipid transport;		>KAB1226653.1 Non-specific lipid transfer protein GPI-anchored 2 [Morella rubra]
CJ030_MR1G025247	-22.6606	5.28653e-06	28.81	0	0	0	0	0		GO:0016021//integral component of membrane;		>KAB1226030.1 hypothetical protein CJ030_MR1G025247 [Morella rubra]
CJ030_MR1G025248	-21.8786	3.75571e-08	19.55	0	0	0	0	0		GO:0016021//integral component of membrane;		>KAB1226031.1 hypothetical protein CJ030_MR1G025248 [Morella rubra]
CJ030_MR1G028619	-6.16467	0.0025527	0.79	0.07	0.22	0.56	42.02	0.19	NF-YA	GO:0009570//chloroplast stroma;GO:0009534//chloroplast thylakoid;GO:0016165//linoleate 13S-lipoxygenase activity;GO:0046872//metal ion binding;GO:0016702//oxidoreductase activity, acting on single donors with incorporation of molecular oxygen, incorporation of two atoms of oxygen;GO:0006633//fatty acid biosynthetic process;GO:0010597//green leaf volatile biosynthetic process;GO:0034440//lipid oxi…	K00454//lipoxygenase [EC:1.13.11.12]+ko00591//Linoleic acid metabolism+ko00592//alpha-Linolenic acid metabolism+ko01100//Metabolic pathways+ko01110//Biosynthesis of secondary metabolites;	>KAB1224769.1 Linoleate 13S-lipoxygenase 2-1, chloroplastic [Morella rubra]
CJ030_MR1G028635	-5.41452	0.0207065	1.05	0.2	0.5	0.81	52.16	0.19	NF-YA	GO:0009570//chloroplast stroma;GO:0009534//chloroplast thylakoid;GO:0016165//linoleate 13S-lipoxygenase activity;GO:0046872//metal ion binding;GO:0016702//oxidoreductase activity, acting on single donors with incorporation of molecular oxygen, incorporation of two atoms of oxygen;GO:0006633//fatty acid biosynthetic process;GO:0010597//green leaf volatile biosynthetic process;GO:0034440//lipid oxi…	K00454//lipoxygenase [EC:1.13.11.12]+ko00591//Linoleic acid metabolism+ko00592//alpha-Linolenic acid metabolism+ko01100//Metabolic pathways+ko01110//Biosynthesis of secondary metabolites;	>KAB1224785.1 Linoleate 13S-lipoxygenase 2-1, chloroplastic [Morella rubra]
CJ030_MR1G028636	-5.90088	0.0278047	0.86	0.23	0.42	0.75	54.07	0.17	ERF	GO:0009507//chloroplast;GO:0046872//metal ion binding;GO:0016702//oxidoreductase activity, acting on single donors with incorporation of molecular oxygen, incorporation of two atoms of oxygen;GO:0006633//fatty acid biosynthetic process;GO:0031408//oxylipin biosynthetic process;	K00454//lipoxygenase [EC:1.13.11.12]+ko00591//Linoleic acid metabolism+ko00592//alpha-Linolenic acid metabolism+ko01100//Metabolic pathways+ko01110//Biosynthesis of secondary metabolites;	>KAB1224786.1 Linoleate 13S-lipoxygenase 2-1, chloroplastic [Morella rubra]
CJ030_MR1G028663	-23.188	2.88165e-06	10.52	0	0	0	0	0		GO:0005737//cytoplasm;GO:0016607//nuclear speck;GO:0003723//RNA binding;GO:0006397//mRNA processing;	K14396//polyadenylate-binding protein 2+ko03015//mRNA surveillance pathway;	>KAB1224725.1 Polyadenylate-binding protein 2-A [Morella rubra] >KAB1224813.1 Polyadenylate-binding protein 2-A [Morella rubra]
CJ030_MR2G000184	-2.65334	0.0120485	39.47	3.08	1.94	18.66	46.21	8.57		GO:0016021//integral component of membrane;GO:0016020//membrane;GO:0090447//glycerol-3-phosphate 2-O-acyltransferase activity;GO:0016791//phosphatase activity;GO:0102419//sn-2-glycerol-3-phosphate omega-OH-C22:0-CoA acyl transferase activity;GO:0010143//cutin biosynthetic process;GO:0009908//flower development;GO:0008654//phospholipid biosynthetic process;	K13508//glycerol-3-phosphate acyltransferase [EC:2.3.1.15 2.3.1.198]+ko00561//Glycerolipid metabolism+ko00564//Glycerophospholipid metabolism+ko01100//Metabolic pathways+ko01110//Biosynthesis of secondary metabolites;	>KAB1224315.1 Glycerol-3-phosphate 2-O-acyltransferase 6 [Morella rubra]
CJ030_MR2G003985	-4.505	0.0171425	4.58	0	0.12	1.77	0.91	0.16		GO:0016021//integral component of membrane;		>KAB1201310.1 hypothetical protein CJ030_MR0G004285 [Morella rubra] >KAB1201340.1 hypothetical protein CJ030_MR0G004315 [Morella rubra]
CJ030_MR2G006704	-1.24818	0.0213021	32.28	11.13	10.88	27.12	44.45	14.92	C3H	GO:0005576//extracellular region;GO:0009505//plant-type cell wall;GO:0009506//plasmodesma;GO:0005773//vacuole;GO:0004185//serine-type carboxypeptidase activity;		>KAB1222170.1 Serine carboxypeptidase-like 45 [Morella rubra]
CJ030_MR2G011719	-6.6302	0.0117366	0.31	0	0	0.35	0.65	0	MYB_related	GO:0005524//ATP binding;GO:0004618//phosphoglycerate kinase activity;GO:0008176//tRNA (guanine-N7-)-methyltransferase activity;GO:0006096//glycolytic process;	K00927//phosphoglycerate kinase [EC:2.7.2.3]+ko00010//Glycolysis / Gluconeogenesis+ko00710//Carbon fixation in photosynthetic organisms+ko01100//Metabolic pathways+ko01110//Biosynthesis of secondary metabolites+ko01200//Carbon metabolism+ko01230//Biosynthesis of amino acids;	>KAB1223668.1 Phosphoglycerate kinase [Morella rubra]
CJ030_MR2G024092	-1.61419	0.012346	21.95	6.34	5.41	11.04	20.46	3.26	C2H2	GO:0016207//4-coumarate-CoA ligase activity;GO:0005524//ATP binding;GO:0016405//CoA-ligase activity;GO:0009698//phenylpropanoid metabolic process;	K01904//4-coumarate--CoA ligase [EC:6.2.1.12]+ko00130//Ubiquinone and other terpenoid-quinone biosynthesis+ko00940//Phenylpropanoid biosynthesis+ko01100//Metabolic pathways+ko01110//Biosynthesis of secondary metabolites;	>KAB1223617.1 4-coumarate--CoA ligase 2 [Morella rubra]
CJ030_MR2G024436	2.15249	0.037514	13.14	91.74	72.79	39.78	21.5	132.61		GO:0005737//cytoplasm;GO:0005524//ATP binding;GO:0016301//kinase activity;GO:0000287//magnesium ion binding;GO:0030955//potassium ion binding;GO:0004743//pyruvate kinase activity;GO:0006096//glycolytic process;	K00873//pyruvate kinase [EC:2.7.1.40]+ko00010//Glycolysis / Gluconeogenesis+ko00620//Pyruvate metabolism+ko01100//Metabolic pathways+ko01110//Biosynthesis of secondary metabolites+ko01200//Carbon metabolism+ko01230//Biosynthesis of amino acids;	>KAB1224159.1 Pyruvate kinase, cytosolic isozyme [Morella rubra] >KAB1224190.1 Pyruvate kinase, cytosolic isozyme [Morella rubra]
CJ030_MR3G009922	-2.31833	0.00107139	28.54	6.24	5.99	13.74	37.68	2.16		GO:0005618//cell wall;GO:0005576//extracellular region;GO:0005886//plasma membrane;GO:0016787//hydrolase activity;GO:0071555//cell wall organization;		>KAB1220462.1 hypothetical protein CJ030_MR3G009922 [Morella rubra]
CJ030_MR3G011165	-3.5987	0.012849	435.74	44.33	14.59	37.39	964.77	36.21				>KAB1219575.1 Glycine-rich protein DC7.1 [Morella rubra]
CJ030_MR3G015750	-3.54686	0.00278644	4.24	0.13	0.3	1.7	2.9	0.23	G2-like	GO:0016021//integral component of membrane;GO:0106144//fraxetin 5-hydroxylase activity;GO:0020037//heme binding;GO:0005506//iron ion binding;GO:0004497//monooxygenase activity;GO:0071281//cellular response to iron ion;GO:0098542//defense response to other organism;GO:0010039//response to iron ion;GO:0106146//sideretin biosynthesis;	K23136//fraxetin 5-hydroxylase [EC:1.14.14.164]+ko00999//Biosynthesis of various plant secondary metabolites+ko01110//Biosynthesis of secondary metabolites;	>KAB1220497.1 Cytochrome P450 82C4 [Morella rubra]
CJ030_MR4G001508	-20.6844	6.26494e-05	10.3	0	0	0	0	0	bHLH	GO:0005783//endoplasmic reticulum;GO:0016021//integral component of membrane;GO:0005886//plasma membrane;GO:0020037//heme binding;GO:0005506//iron ion binding;GO:0004497//monooxygenase activity;GO:0016705//oxidoreductase activity, acting on paired donors, with incorporation or reduction of molecular oxygen;GO:0009809//lignin biosynthetic process;GO:0009699//phenylpropanoid biosynthetic process;GO…	K09755//ferulate-5-hydroxylase [EC:1.14.-.-]+ko00940//Phenylpropanoid biosynthesis+ko01100//Metabolic pathways+ko01110//Biosynthesis of secondary metabolites;	>KAB1216675.1 Cytochrome P450 84A1 [Morella rubra]
CJ030_MR4G002209	-22.7223	5.21752e-06	0	0	0	0	35.06	0		GO:0005829//cytosol;		>KAB1216551.1 28 kDa heat- and acid-stable phosphoprotein [Morella rubra]
CJ030_MR4G004176	-21.3553	1.10133e-07	0	0	0	0	4.32	0		GO:0005739//mitochondrion;		>KAB1215242.1 putative serine/threonine-protein kinase abkC [Morella rubra]
CJ030_MR4G008729	-1.37011	0.026419	26.22	6.7	6.03	17.48	19.02	8.21	NF-YC	GO:0016021//integral component of membrane;GO:0016020//membrane;		>KAB1217471.1 putative transporter MCH1 [Morella rubra]
CJ030_MR4G020440	-22.6426	5.28653e-06	18.21	0	0	0	0	0				>KAB1215730.1 Poly(U)-specific endoribonuclease-B [Morella rubra]
CJ030_MR4G025839	-1.62646	0.00214777	21.11	5.26	7.43	18.4	26.62	5.47		GO:0009507//chloroplast;GO:0009535//chloroplast thylakoid membrane;GO:0042651//thylakoid membrane;GO:0046872//metal ion binding;GO:0004659//prenyltransferase activity;GO:0043693//monoterpene biosynthetic process;	K13789//geranylgeranyl diphosphate synthase, type II [EC:2.5.1.1 2.5.1.10 2.5.1.29]+ko00900//Terpenoid backbone biosynthesis+ko01100//Metabolic pathways+ko01110//Biosynthesis of secondary metabolites;	>KAB1215193.1 Heterodimeric geranylgeranyl pyrophosphate synthase large subunit 1, chloroplastic [Morella rubra]
CJ030_MR4G029050	-21.3447	1.31734e-07	1.59	0	0	0	0	0	NAC	GO:0005737//cytoplasm;GO:0005634//nucleus;GO:0043531//ADP binding;GO:0050135//NAD(P)+ nucleosidase activity;GO:0061809//NAD+ nucleotidase, cyclic ADP-ribose generating;GO:0042803//protein homodimerization activity;GO:0050832//defense response to fungus;GO:0043068//positive regulation of programmed cell death;GO:0007165//signal transduction;	K00695//sucrose synthase [EC:2.4.1.13]+ko00500//Starch and sucrose metabolism+ko01100//Metabolic pathways+ko01110//Biosynthesis of secondary metabolites;	>KAB1216444.1 TMV resistance protein N [Morella rubra]
CJ030_MR5G000977	-5.62676	0.00127945	22.83	0.28	0.1	0.21	25.57	0.28	NAC	GO:0005634//nucleus;GO:0003729//mRNA binding;GO:0006397//mRNA processing;		>KAB1211916.1 Oligouridylate-binding protein 1B [Morella rubra] >KAB1218331.1 Oligouridylate-binding protein 1B [Morella rubra]
CJ030_MR5G004902	-6.83609	0.00514193	3.37	0	0	1.38	2.35	0.05	bHLH	GO:0046872//metal ion binding;GO:0061630//ubiquitin protein ligase activity;GO:0009908//flower development;GO:0043161//proteasome-mediated ubiquitin-dependent protein catabolic process;GO:0040008//regulation of growth;GO:0010228//vegetative to reproductive phase transition of meristem;		>KAB1214751.1 E3 ubiquitin ligase BIG BROTHER [Morella rubra]
CJ030_MR5G022109	21.1068	9.92217e-08	0	9.53	0	0	0	0		GO:0005737//cytoplasm;GO:0016868//intramolecular transferase activity, phosphotransferases;GO:0016791//phosphatase activity;	K15634//2,3-bisphosphoglycerate-dependent phosphoglycerate mutase [EC:5.4.2.11]+ko00010//Glycolysis / Gluconeogenesis+ko00260//Glycine, serine and threonine metabolism+ko01100//Metabolic pathways+ko01110//Biosynthesis of secondary metabolites+ko01200//Carbon metabolism+ko01230//Biosynthesis of amino acids;	>KAB1214660.1 putative phosphoglycerate mutase GpmB [Morella rubra]
CJ030_MR5G023115	1.87866	0.0211424	4.12	17.58	10.94	6.22	3.54	17.18		GO:0005737//cytoplasm;GO:0016768//spermine synthase activity;GO:0010487//thermospermine synthase activity;GO:0009926//auxin polar transport;GO:0010087//phloem or xylem histogenesis;GO:0006596//polyamine biosynthetic process;GO:0048759//xylem vessel member cell differentiation;		>KAB1214202.1 Thermospermine synthase ACAULIS5 [Morella rubra]
CJ030_MR6G013360	21.542	2.08975e-05	0	6.43	0	0	0	0	CAMTA	GO:0005634//nucleus;GO:0005516//calmodulin binding;GO:0003700//DNA-binding transcription factor activity;GO:0003690//double-stranded DNA binding;GO:0043565//sequence-specific DNA binding;GO:0003712//transcription coregulator activity;GO:0070417//cellular response to cold;GO:0042742//defense response to bacterium;GO:0050832//defense response to fungus;GO:0010150//leaf senescence;GO:1900367//positi…		>KAB1210236.1 Calmodulin-binding transcription activator 3 [Morella rubra]
CJ030_MR6G018030	23.4404	2.10657e-06	0	0	29.88	0	0	0	NAC	GO:0005737//cytoplasm;GO:0005829//cytosol;GO:0005886//plasma membrane;GO:0003729//mRNA binding;GO:0046719//regulation by virus of viral protein levels in host cell;GO:0010468//regulation of gene expression;GO:0008380//RNA splicing;		>KAB1211044.1 RNA-binding protein Nova-1 [Morella rubra] >KAB1219000.1 RNA-binding protein Nova-1 [Morella rubra]
CJ030_MR6G019702	-22.3793	7.14285e-06	21.34	0	0	0	0	0	NAC	GO:0005737//cytoplasm;GO:0005739//mitochondrion;GO:0016629//12-oxophytodienoate reductase activity;GO:0010181//FMN binding;GO:0016491//oxidoreductase activity;GO:0006633//fatty acid biosynthetic process;GO:0009695//jasmonic acid biosynthetic process;GO:0031408//oxylipin biosynthetic process;GO:0009611//response to wounding;	K05894//12-oxophytodienoic acid reductase [EC:1.3.1.42]+ko00592//alpha-Linolenic acid metabolism+ko01100//Metabolic pathways+ko01110//Biosynthesis of secondary metabolites;	>KAB1210907.1 12-oxophytodienoate reductase 2 [Morella rubra] >KAB1210920.1 12-oxophytodienoate reductase 2 [Morella rubra]
CJ030_MR6G024807	-1.14885	0.048881	36.53	16.91	11.16	24.93	38.7	11.01		GO:0005576//extracellular region;GO:0016297//acyl-[acyl-carrier-protein] hydrolase activity;GO:0016042//lipid catabolic process;		>KAB1208771.1 hypothetical protein CJ030_MR6G024807 [Morella rubra]
CJ030_MR7G000357	6.46193	0.00778598	1.04	46.8	16.51	0	0	12.09	bZIP	GO:0005840//ribosome;GO:0003735//structural constituent of ribosome;GO:0006412//translation;	K02866//large subunit ribosomal protein L10e+ko03010//Ribosome;	>KAB1201708.1 60S ribosomal protein L10 [Morella rubra] >KAB1207669.1 60S ribosomal protein L10 [Morella rubra]
CJ030_MR7G001377	21.7943	1.4805e-05	0.02	16.69	0	0	0	0.02	DBB	GO:0005783//endoplasmic reticulum;GO:0005886//plasma membrane;GO:0004252//serine-type endopeptidase activity;GO:0010074//maintenance of meristem identity;GO:0040008//regulation of growth;		>KAB1208403.1 Subtilisin-like protease [Morella rubra]
CJ030_MR7G007723	20.7751	2.31071e-07	0	10.96	0	0	0	0		GO:0005737//cytoplasm;GO:0005634//nucleus;GO:0003723//RNA binding;GO:0006397//mRNA processing;	K12839//survival of motor neuron-related-splicing factor 30+ko03040//Spliceosome;	>KAB1208625.1 Survival of motor neuron-related-splicing factor 30 [Morella rubra] >KAB1208627.1 Survival of motor neuron-related-splicing factor 30 [Morella rubra]
CJ030_MR7G010019	-6.60594	0.00521568	86.42	0	0.72	1.79	4.1	0.18	B3	GO:0016021//integral component of membrane;GO:0097008//(3E)-4,8-dimethyl-1,3,7-nonatriene synthase activity;GO:0097007//4,8,12-trimethyltrideca-1,3,7,11-tetraene synthase activity;GO:0102171//DMNT synthase activity;GO:0020037//heme binding;GO:0005506//iron ion binding;GO:0050832//defense response to fungus;GO:0002213//defense response to insect;GO:0098542//defense response to other organism;GO:19…	K17961//trimethyltridecatetraene/dimethylnonatriene synthase [EC:1.14.14.58 1.14.14.59]+ko00904//Diterpenoid biosynthesis+ko01110//Biosynthesis of secondary metabolites;	>KAB1207783.1 Cytochrome P450 82G1 [Morella rubra]
CJ030_MR7G010582	1.41557	0.000200819	8.07	17.29	17.95	6.64	9.15	19.11	C3H			>KAB1199839.1 putative WD repeat-containing protein C2A9.03 [Morella rubra] >KAB1205477.1 putative WD repeat-containing protein C2A9.03 [Morella rubra] >KAB1207430.1 putative WD repeat-containing protein C2A9.03 [Morella rubra]
CJ030_MR7G010604	-2.59168	0.000115346	4.18	0.54	0.97	3.78	8.35	0.73		GO:0016021//integral component of membrane;GO:0008271//secondary active sulfate transmembrane transporter activity;		>KAB1205455.1 Low affinity sulfate transporter 3 [Morella rubra]
CJ030_MR7G012046	-21.4773	9.92217e-08	27.43	0	0	0	0	0		GO:0031225//anchored component of membrane;GO:0005886//plasma membrane;GO:0009536//plastid;GO:0090406//pollen tube;GO:0045927//positive regulation of growth;	K11584//serine/threonine-protein phosphatase 2A regulatory subunit B'+ko03015//mRNA surveillance pathway;	>KAB1205318.1 GPI-anchored protein LORELEI [Morella rubra]
CJ030_MR7G012526	1.41557	0.000200819	8.07	17.29	17.95	6.64	9.15	19.11	C3H			>KAB1199839.1 putative WD repeat-containing protein C2A9.03 [Morella rubra] >KAB1205477.1 putative WD repeat-containing protein C2A9.03 [Morella rubra] >KAB1207430.1 putative WD repeat-containing protein C2A9.03 [Morella rubra]
CJ030_MR7G012988	-21.8097	3.75571e-08	3.06	0	0	0	0	0	Trihelix	GO:0016021//integral component of membrane;GO:0016020//membrane;GO:0005886//plasma membrane;GO:0005524//ATP binding;GO:0033612//receptor serine/threonine kinase binding;GO:0005102//signaling receptor binding;GO:0009553//embryo sac development;GO:0048481//plant ovule development;GO:0010103//stomatal complex morphogenesis;	K20718//LRR receptor-like serine/threonine-protein kinase ERECTA [EC:2.7.11.1]+ko04016//MAPK signaling pathway - plant;	>KAB1208155.1 LRR receptor-like serine/threonine-protein kinase ERL1 [Morella rubra] >KAB1210808.1 LRR receptor-like serine/threonine-protein kinase ERL1 [Morella rubra]
CJ030_MR7G014368	20.7891	2.34504e-07	0	0	0	0	0	8.86		GO:0009507//chloroplast;GO:0009534//chloroplast thylakoid;GO:0005829//cytosol;GO:0009536//plastid;GO:0010307//acetylglutamate kinase regulator activity;GO:0005524//ATP binding;GO:0030234//enzyme regulator activity;GO:0000287//magnesium ion binding;GO:0009718//anthocyanin-containing compound biosynthetic process;GO:0006807//nitrogen compound metabolic process;GO:2000013//regulation of arginine bio…		>KAB1206195.1 hypothetical protein CJ030_MR7G014340 [Morella rubra] >KAB1206223.1 hypothetical protein CJ030_MR7G014368 [Morella rubra]
CJ030_MR7G014377	-21.663	6.39955e-08	9.4	0	0	0	0	0	bHLH	GO:0016021//integral component of membrane;GO:0005886//plasma membrane;GO:0005516//calmodulin binding;GO:0030552//cAMP binding;GO:0030553//cGMP binding;GO:0005216//ion channel activity;	K05391//cyclic nucleotide gated channel, plant+ko04626//Plant-pathogen interaction;	>KAB1206232.1 Cyclic nucleotide-gated ion channel 1 [Morella rubra]
CJ030_MR7G014383	-23.8927	1.34651e-06	22.56	0	0	0	0	0	bHLH	GO:0016021//integral component of membrane;GO:0005886//plasma membrane;GO:0005516//calmodulin binding;GO:0030552//cAMP binding;GO:0030553//cGMP binding;GO:0005216//ion channel activity;	K05391//cyclic nucleotide gated channel, plant+ko04626//Plant-pathogen interaction;	>KAB1206238.1 Cyclic nucleotide-gated ion channel 1 [Morella rubra]
CJ030_MR7G014393	-5.94311	0.000115346	11.72	0.07	0.1	0.35	5.73	0.09		GO:0016021//integral component of membrane;GO:0005886//plasma membrane;GO:0005516//calmodulin binding;GO:0030552//cAMP binding;GO:0030553//cGMP binding;GO:0005216//ion channel activity;	K05391//cyclic nucleotide gated channel, plant+ko04626//Plant-pathogen interaction;	>KAB1206248.1 hypothetical protein CJ030_MR7G014393 [Morella rubra]
CJ030_MR7G015304	8.80002	0.0020057	0.06	2.68	0.38	0.1	0	22.5				>KAB1204863.1 hypothetical protein CJ030_MR7G015304 [Morella rubra] >KAB1204874.1 hypothetical protein CJ030_MR7G015292 [Morella rubra]
CJ030_MR8G002107	22.7961	4.8318e-06	0	0	22.58	0	0	0				>KAB1203993.1 hypothetical protein CJ030_MR8G002112 [Morella rubra]
CJ030_MR8G020204	-1.49351	0.0207065	33.55	10.92	6.98	15.57	35.09	7.45		GO:0047918//GDP-mannose 3,5-epimerase activity;GO:0051287//NAD binding;GO:0019853//L-ascorbic acid biosynthetic process;	K10046//GDP-D-mannose 3', 5'-epimerase [EC:5.1.3.18 5.1.3.-]+ko00053//Ascorbate and aldarate metabolism+ko00520//Amino sugar and nucleotide sugar metabolism+ko01100//Metabolic pathways+ko01110//Biosynthesis of secondary metabolites+ko01240//Biosynthesis of cofactors+ko01250//Biosynthesis of nucleotide sugars;	>KAB1202870.1 GDP-mannose 3,5-epimerase 1 [Morella rubra]
CJ030_MR8G027695	1.47096	0.00160329	79.89	267.48	276.09	117.46	112.84	210.89		GO:0005886//plasma membrane;GO:0046872//metal ion binding;GO:0061630//ubiquitin protein ligase activity;GO:0009630//gravitropism;GO:0016567//protein ubiquitination;GO:0048364//root development;		>KAB1203840.1 hypothetical protein CJ030_MR8G027695 [Morella rubra]
XLOC_002005	-4.91607	0.00117195	319.87	1.65	6.58	6.38	147.29	4.38	MYB_related	GO:0008289//lipid binding;GO:0006869//lipid transport;		>KAB1225673.1 Non-specific lipid-transfer protein [Morella rubra] >KAB1225674.1 Non-specific lipid-transfer protein [Morella rubra] >KAB1225678.1 Non-specific lipid-transfer protein [Morella rubra]
XLOC_005534	-21.9055	1.32275e-05	7.65	0	0	0	0	0	C2H2	GO:0005737//cytoplasm;GO:0008270//zinc ion binding;	K12501//homogentisate solanesyltransferase [EC:2.5.1.117]+ko00130//Ubiquinone and other terpenoid-quinone biosynthesis+ko01100//Metabolic pathways+ko01110//Biosynthesis of secondary metabolites+ko01240//Biosynthesis of cofactors;	>KAB1222439.1 hypothetical protein CJ030_MR2G028767 [Morella rubra] >KAB1222442.1 hypothetical protein CJ030_MR2G028770 [Morella rubra]
XLOC_005750	-3.14348	0.012346	20.54	2.57	0.81	6.43	9.73	0.37		GO:0016021//integral component of membrane;GO:0016020//membrane;GO:0090447//glycerol-3-phosphate 2-O-acyltransferase activity;GO:0004366//glycerol-3-phosphate O-acyltransferase activity;GO:0016791//phosphatase activity;GO:0102420//sn-1-glycerol-3-phosphate C16:0-DCA-CoA acyl transferase activity;GO:0016024//CDP-diacylglycerol biosynthetic process;GO:0010143//cutin biosynthetic process;	K13508//glycerol-3-phosphate acyltransferase [EC:2.3.1.15 2.3.1.198]+ko00561//Glycerolipid metabolism+ko00564//Glycerophospholipid metabolism+ko01100//Metabolic pathways+ko01110//Biosynthesis of secondary metabolites;	>KAB1222933.1 putative glycerol-3-phosphate acyltransferase 3 [Morella rubra]
XLOC_008387	9.49242	9.92217e-08	0	3.3	0.68	0	0	2.7		GO:0005737//cytoplasm;GO:0016021//integral component of membrane;GO:0005886//plasma membrane;GO:0005096//GTPase activator activity;GO:0045159//myosin II binding;GO:0019905//syntaxin binding;GO:0017157//regulation of exocytosis;GO:0016192//vesicle-mediated transport;		>KAB1217625.1 Syntaxin-binding protein 5-like [Morella rubra] >KAB1217694.1 Syntaxin-binding protein 5-like [Morella rubra]
XLOC_011273	21.3471	2.57285e-05	0	0	0	0	0	5.81	MYB_related	GO:0005634//nucleus;GO:0005524//ATP binding;GO:0061631//ubiquitin conjugating enzyme activity;GO:0000209//protein polyubiquitination;GO:0006511//ubiquitin-dependent protein catabolic process;	K06689//ubiquitin-conjugating enzyme E2 D [EC:2.3.2.23]+ko04120//Ubiquitin mediated proteolysis+ko04141//Protein processing in endoplasmic reticulum;	>KAF3973794.1 hypothetical protein CMV_002819 [Castanea mollissima]
XLOC_012279	-23.1842	2.88165e-06	13.91	0	0	0	0	0	C2H2	GO:0005829//cytosol;GO:0005759//mitochondrial matrix;GO:0016740//transferase activity;GO:0016226//iron-sulfur cluster assembly;		>KAB1217079.1 hypothetical protein CJ030_MR4G021242 [Morella rubra] >KAB1217087.1 hypothetical protein CJ030_MR4G021234 [Morella rubra] >KAB1217096.1 hypothetical protein CJ030_MR4G021225 [Morella rubra]
XLOC_015421	22.8848	4.39013e-06	0	0	16.51	0	0	0		GO:0005783//endoplasmic reticulum;GO:0016021//integral component of membrane;GO:0005385//zinc ion transmembrane transporter activity;GO:0006882//cellular zinc ion homeostasis;GO:0071577//zinc ion transmembrane transport;		>KAB8643108.1 hypothetical protein FH972_026104 [Carpinus fangiana]
XLOC_016278	22.4148	7.14285e-06	0	25.98	0	0	0	0		GO:0005829//cytosol;GO:0005634//nucleus;GO:0004197//cysteine-type endopeptidase activity;GO:0004843//thiol-dependent ubiquitin-specific protease activity;GO:0016579//protein deubiquitination;GO:0006511//ubiquitin-dependent protein catabolic process;		>KAB1210235.1 Ubiquitin carboxyl-terminal hydrolase 4 [Morella rubra]
XLOC_016549	21.3727	2.55679e-05	0	0	12.05	0	0	0		GO:0005737//cytoplasm;GO:0005634//nucleus;GO:0051879//Hsp90 protein binding;GO:0008270//zinc ion binding;GO:0042742//defense response to bacterium;GO:0050832//defense response to fungus;GO:0009626//plant-type hypersensitive response;GO:0050821//protein stabilization;GO:0002679//respiratory burst involved in defense response;	K13458//disease resistance protein+ko04626//Plant-pathogen interaction;	>XP_041002755.1 cysteine and histidine-rich domain-containing protein RAR1 [Juglans microcarpa x Juglans regia]
XLOC_018346	-3.21714	0.00264262	8.78	1.49	0.56	5.58	9.74	0.34	MYB	GO:0031225//anchored component of membrane;GO:0046658//anchored component of plasma membrane;GO:0005886//plasma membrane;GO:0009536//plastid;GO:0005773//vacuole;GO:0009055//electron transfer activity;		>KAB1211474.1 Lamin-like protein [Morella rubra] >KAB1211477.1 Lamin-like protein [Morella rubra]
XLOC_018794	21.8889	1.32275e-05	0	0	14.28	0	0.03	0		GO:0005783//endoplasmic reticulum;GO:0005789//endoplasmic reticulum membrane;GO:0016021//integral component of membrane;GO:0080132//fatty acid alpha-hydroxylase activity;GO:0005506//iron ion binding;GO:0102771//sphingolipid very long chain fatty acid alpha-hydroxylase activity;GO:0006633//fatty acid biosynthetic process;GO:0006631//fatty acid metabolic process;GO:0000038//very long-chain fatty ac…		>KAB1199830.1 Fatty acid 2-hydroxylase 1 [Morella rubra] >KAB1205468.1 Fatty acid 2-hydroxylase 1 [Morella rubra] >KAB1207439.1 Fatty acid 2-hydroxylase 1 [Morella rubra]
XLOC_021502	1.02131	0.018908	36.68	81.79	54.83	28.43	46.74	56.6	C3H	GO:0005829//cytosol;		>KAB1199839.1 putative WD repeat-containing protein C2A9.03 [Morella rubra] >KAB1205477.1 putative WD repeat-containing protein C2A9.03 [Morella rubra] >KAB1207430.1 putative WD repeat-containing protein C2A9.03 [Morella rubra]
XLOC_021848	-22.3864	7.14285e-06	9.78	0	0	0	0	0				>KAB1208179.1 Pheophytinase, chloroplastic [Morella rubra] >KAB1210834.1 Pheophytinase, chloroplastic [Morella rubra]
XLOC_022921	-22.2988	7.80293e-06	5.89	0	0	0	0	0	HSF	GO:0005524//ATP binding;GO:0004672//protein kinase activity;		>KAB1203336.1 putative protein phosphatase 2C 51 [Morella rubra] >KAB1203344.1 putative protein phosphatase 2C 51 [Morella rubra]
XLOC_023757	-4.36282	0.00699949	5.35	1.02	0.66	3.37	61.67	1.02	bHLH	GO:0090575//RNA polymerase II transcription factor complex;GO:0003700//DNA-binding transcription factor activity;GO:0000981//DNA-binding transcription factor activity, RNA polymerase II-specific;GO:0046983//protein dimerization activity;GO:0000977//RNA polymerase II regulatory region sequence-specific DNA binding;GO:0050832//defense response to fungus;GO:0006357//regulation of transcription by RN…		>KAB1201846.1 hypothetical protein CJ030_MR8G004382 [Morella rubra] >KAB1201856.1 hypothetical protein CJ030_MR8G004392 [Morella rubra]
XLOC_024001	21.3687	2.55679e-05	0	5.84	0	0	0	0	GRAS	GO:0005737//cytoplasm;GO:0005634//nucleus;GO:0010331//gibberellin binding;GO:0016787//hydrolase activity;GO:0048444//floral organ morphogenesis;GO:0048530//fruit morphogenesis;GO:0010476//gibberellin mediated signaling pathway;GO:0010629//negative regulation of gene expression;GO:0009939//positive regulation of gibberellic acid mediated signaling pathway;GO:0010325//raffinose family oligosacchari…	K14493//gibberellin receptor GID1 [EC:3.-.-.-]+ko04075//Plant hormone signal transduction;	>KAB1202336.1 Gibberellin receptor GID1C [Morella rubra]
XLOC_025067	-21.3746	1.10133e-07	4.77	0	0	0	0	0	MYB	GO:0005829//cytosol;GO:0005730//nucleolus;GO:0005634//nucleus;GO:0009506//plasmodesma;GO:0005524//ATP binding;GO:0016887//ATPase activity;GO:0003690//double-stranded DNA binding;GO:0003725//double-stranded RNA binding;GO:0003729//mRNA binding;GO:0003723//RNA binding;GO:0003724//RNA helicase activity;GO:0003727//single-stranded RNA binding;GO:0006397//mRNA processing;GO:0051028//mRNA transport;GO:…	K12812//ATP-dependent RNA helicase UAP56/SUB2 [EC:3.6.4.13]+ko03013//Nucleocytoplasmic transport+ko03015//mRNA surveillance pathway+ko03040//Spliceosome;	>XP_018822222.1 DEAD-box ATP-dependent RNA helicase 15 [Juglans regia] >XP_041019589.1 DEAD-box ATP-dependent RNA helicase 15 [Juglans microcarpa x Juglans regia] >KAF5456721.1 hypothetical protein F2P56_026168 [Juglans regia]
XLOC_026060	-23.7762	1.44293e-06	13.68	0	0	0	0	0	Nin-like	GO:0005634//nucleus;GO:0001046//core promoter sequence-specific DNA binding;GO:0003700//DNA-binding transcription factor activity;GO:0000976//transcription regulatory region sequence-specific DNA binding;GO:0042128//nitrate assimilation;GO:0010167//response to nitrate;GO:0009414//response to water deprivation;GO:0010118//stomatal movement;		>KAB1201136.1 Protein NLP7 [Morella rubra] >KAB1201139.1 Protein NLP7 [Morella rubra]
XLOC_026261	20.8478	1.56595e-07	0	4.98	0	0	0	0		GO:0008278//cohesin complex;GO:0005634//nucleus;GO:0005524//ATP binding;GO:0016887//ATPase activity;GO:0003677//DNA binding;GO:0051301//cell division;GO:0007059//chromosome segregation;GO:0006281//DNA repair;GO:0051321//meiotic cell cycle;GO:0007064//mitotic sister chromatid cohesion;GO:0007062//sister chromatid cohesion;		>KAG2719149.1 hypothetical protein I3760_03G256200 [Carya illinoinensis]
XLOC_026323	21.0956	9.92217e-08	0	0	5.32	0	0	0	C2H2	GO:0008270//zinc ion binding;		>KAB1200878.1 Zinc finger AN1 and C2H2 domain-containing stress-associated protein 16 [Morella rubra]
XLOC_028117	-22.0979	1.02897e-05	4.64	0	0	0	0	0	TCP	GO:0009897//external side of plasma membrane;GO:0016021//integral component of membrane;GO:0005634//nucleus;GO:0005886//plasma membrane;GO:0005524//ATP binding;GO:0042626//ATPase activity, coupled to transmembrane movement of substances;GO:0015562//efflux transmembrane transporter activity;GO:0015245//fatty acid transmembrane transporter activity;GO:0042803//protein homodimerization activity;GO:0…		>KAB1199046.1 ABC transporter G family member 11 [Morella rubra] >KAB1199047.1 ABC transporter G family member 11 [Morella rubra]
