# Supplementary material for: Integration analysis of transcriptome and metabolome reveals role of piceatannol in regulation of fruit drop in Chinese bayberry (Morella rubra Sieb. et Zucc.)
Source: Research Square preprint supplement (doi:10.21203/rs.3.rs-7503570/v1), 2025-10-09
Supplement: Supplementary file 2 [file 800ef28149d3f43406a5eccf.xlsx]

## Sheet: Table S1
Supplemental Table S1. Information of 842 metabolites in peduncles from the plants treated with 2,4-D compared with the contrast under positive ion mode.
Table legend:
ID	ID of metabolites identified in mass spectrometry detection
adduct	Addition ion information of compounds
Name	Name of identified metabolites
VIP	Variable Importance for the Projection
A	Content of metabolites identified in peduncles from the blank control
B	Content of metabolites identified in peduncles treated with 2,4-D
FoldChange	Fold change value of each metabolite
p-value	Wald test p-value
ID	adduct	Name	VIP	Fold change (A vs B)	p-value	m/z	rt(min)	KEGG	Superclass	Class	Subclass	Formula	INCHIKEY	SMILES	A-1	A-2	A-3	B-1	B-2	B-3
POS_19799	[M+NH4]+	Methyl 2,4,10-triacetyloxy-5,9-dihydroxy-1,4a-dimethyl-7-propan-2-yl-2,3,4,9,10,10a-hexahydrophenanthrene-1-carboxylate	2.19763	0.269289	0.0163581	538.264	5.982		Lipids and lipid-like molecules	Steroids and steroid derivatives	Hydroxysteroids	C27H36O10	CDYGRHOHQUXDMN-UHFFFAOYSA-N	COC(=O)C1(C)C(CC(OC(C)=O)C2(C)C1C(OC(C)=O)C(O)C3=CC(=CC(=C23)O)C(C)C)OC(C)=O	1472.7	295496	280572	565788	702866	876032
POS_3072	[M+H]+	Benzyl benzoate	1.11369	0.312717	0.0275194	213.09	5.979	C12537	Benzenoids	Benzene and substituted derivatives	Benzoic acids and derivatives	C14H12O2	SESFRYSPDFLNCH-UHFFFAOYSA-N	O=C(OCC1=CC=CC=C1)C2=CC=CC=C2	38085.5	86170.4	57034.5	124035	207239	248453
POS_4330	[M+H]+	Arglabin	1.4737	0.377043	0.0350482	247.131	4.676					C15H18O3	UVJYAKBJSGRTHA-ZFFQGIBWSA-N	CC1=CC[C@]23C1C4C(CC[C@]2(O3)C)C(=C)C(=O)O4	124341	173266	127211	240393	395611	490703
POS_7782	[M+H]+	Bavachin	1.72012	0.276595	0.048613	325.138	7.265		Phenylpropanoids and polyketides	Flavonoids	Flavans	C20H20O4	OAUREGNZECGNQS-UHFFFAOYSA-N	CC(C)=CCC1=C(O)C=C2OC(CC(=O)C2=C1)C3=CC=C(O)C=C3	2365.16	209666	146149	270514	431912	592535
POS_15092	[M+H]+	Ursolic acid	4.63548	0.605433	0.0538039	457.366	11.262		Lipids and lipid-like molecules	Prenol lipids	Triterpenoids	C30H48O3	WCGUUGGRBIKTOS-UHFFFAOYSA-N	CC1CCC2(CCC3(C)C(=CCC4C5(C)CCC(O)C(C)(C)C5CCC34C)C2C1C)C(O)=O	2.3084e+06	4.03509e+06	4.65638e+06	5.0414e+06	6.26635e+06	6.86084e+06
POS_5785	[M+H]+	6,3'-Dimethoxyflavone	1.65173	0.329354	0.0553671	283.096	8.655		Phenylpropanoids and polyketides	Flavonoids	O-methylated flavonoids	C17H14O4	LLLIKVGWTVPYAL-UHFFFAOYSA-N	COC1=CC=CC(=C1)C2=CC(=O)C3=CC(=CC=C3O2)OC	101926	243222	108348	260514	619360	497055
POS_779	[M+H]+	Trigonelline	2.62848	0.341883	0.0579386	138.054	1.101	C01004	Alkaloids and derivatives			C7H7NO2	WWNNZCOKKKDOPX-UHFFFAOYSA-N	C[N+]1=CC(=CC=C1)C([O-])=O	224.336	504033	905861	1.09689e+06	1.81405e+06	1.21363e+06
POS_5121	[M+H]+	Tectochrysin	1.12173	0.227131	0.0685406	269.078	8.82	C11621	Phenylpropanoids and polyketides	Flavonoids	O-methylated flavonoids	C16H12O4	IRZVHDLBAYNPCT-UHFFFAOYSA-N	COC1=CC(=C2C(=O)C=C(OC2=C1)C3=CC=CC=C3)O	42178.4	66244.7	34603.1	104934	328318	196456
POS_15742	[M+Na]+	Phenethyl sophoroside	2.43645	0.415696	0.0888987	469.168	3.87		Organic oxygen compounds	Organooxygen compounds	Carbohydrates and carbohydrate conjugates	C20H30O11	BSSIFJHEGYUPRJ-HNCKFYPBSA-N	OC[C@H]1O[C@@H](O[C@@H]2[C@@H](O)[C@H](O)[C@@H](CO)O[C@H]2OCCC3=CC=CC=C3)[C@H](O)[C@@H](O)[C@@H]1O	9016.49	815494	497632	773046	1.25985e+06	1.14765e+06
POS_33549	[M+NH4]+	(6-{[1-(5-ethyl-6-methylheptan-2-yl)-9a,11a-dimethyl-1H,2H,3H,3aH,3bH,4H,6H,7H,8H,9H,9bH,10H,11H-cyclopenta[a]phenanthren-7-yl]oxy}-3,4,5-trihydroxyoxan-2-yl)methyl octadeca-9,12-dienoate	0.573921	2.12266	0.445265	856.694	13.051		Lipids and lipid-like molecules	Fatty Acyls	Fatty acids and conjugates	C53H90O7	LGOFPEZSCRRDEE-UHFFFAOYSA-N	O=C(OCC1OC(OC2CC3=CCC4C(CCC5(C)C(CCC45)C(C)CCC(CC)C(C)C)C3(C)CC2)C(O)C(O)C1O)CCCCCCCC=CCC=CCCCCC	4378.72	212442	449290	199023	17608.8	97177.7
POS_33487	[M+NH4]+	(6-{[1-(5-ethyl-6-methylheptan-2-yl)-9a,11a-dimethyl-1H,2H,3H,3aH,3bH,4H,6H,7H,8H,9H,9bH,10H,11H-cyclopenta[a]phenanthren-7-yl]oxy}-3,4,5-trihydroxyoxan-2-yl)methyl octadeca-9,12,15-trienoate	3.09315	0.561069	0.411075	854.687	14.316		Lipids and lipid-like molecules	Fatty Acyls	Fatty acids and conjugates	C53H88O7	BYFNXTURFRVSSA-UHFFFAOYSA-N	O=C(OCC1OC(OC2CC3=CCC4C(CCC5(C)C(CCC45)C(C)CCC(CC)C(C)C)C3(C)CC2)C(O)C(O)C1O)CCCCCCCC=CCC=CCC=CCC	392683	3.57618e+06	239267	2.19599e+06	1.82818e+06	3.47604e+06
POS_27484	[M+Na]+	1-O-[(2alpha,3beta,5xi,6beta,9xi,18xi,19alpha)-2,3,6,19,23-pentahydroxy-28-oxoolean-12-en-28-yl]-beta-D-glucopyranose	0.231549	0.525768	0.314319	705.362	7.224		Lipids and lipid-like molecules	Prenol lipids	Triterpenoids	C36H58O12	BBPOLSMDPRNEHZ-VDWCOSHKSA-N	CC1(C)CCC2(CCC3(C)C(=CCC4C5(C)CC(O)C(O)C(C)(CO)C5C(O)CC34C)C2C1O)C(=O)OC6OC(CO)C(O)C(O)C6O	2622.17	11301.5	6694.21	8623.03	7980.76	22610.9
POS_6905	[M+H]+	(-)-Gallocatechin	0.430249	24.7506	0.382024	307.08	2.332		Phenylpropanoids and polyketides	Flavonoids	Flavans	C15H14O7	XMOCLSLCDHWDHP-DOMZBBRYSA-N	O[C@@H]1CC2=C(O)C=C(O)C=C2O[C@H]1C3=CC(=C(O)C(=C3)O)O	72702	795.61	292.516	705.866	1341.57	933.906
POS_29805	[M+H]+	(-)-Syringaresinol di-O-glucoside	0.0799349	4.32787	0.427972	760.299	4.505					C34H46O18	FFDULTAFAQRACT-NYYYOYJKSA-N	COC1=CC(=CC(=C1O[C@H]2[C@@H]([C@H]([C@@H]([C@H](O2)CO)O)O)O)OC)[C@H]3[C@@H]4CO[C@H]([C@@H]4CO3)C5=CC(=C(C(=C5)OC)O[C@H]6[C@@H]([C@H]([C@@H]([C@H](O6)CO)O)O)O)OC	2998.13	225.076	74.9498	515.635	124.515	121.923
POS_3297	[M+H]+	(+)-Nootkatone	0.53002	1.84908	0.366395	219.172	9.314					C15H22O	WTOYNNBCKUYIKC-JMSVASOKSA-N	C[C@@H]1CC(=O)C=C2[C@]1(C[C@@H](CC2)C(=C)C)C	235488	760078	797404	70959.6	717182	181515
POS_15664	[M+Na]+	(19R)-9-Acetyl-19-hydroxy-10,14-dimethyl-20-oxopentacyclo[11.8.0.0<2,10>.0<4,9 >.0<14,19>]henicos-17-yl acetate	0.536368	0.346853	0.247983	467.275	8.829		Lipids and lipid-like molecules	Steroids and steroid derivatives	Steroid esters	C27H40O5	DMAXEADUOQCSHM-UHFFFAOYSA-N	CC(=O)OC1CCC2(C)C3CCC4(C)C(CC5CCCCC45C(C)=O)C3CC(=O)C2(O)C1	2635.64	39695.1	14981.2	13830.6	97932	53471.4
POS_7414	[M+Na]+	(1E,4E)-1,5-Bis(4-methoxyphenyl)penta-1,4-dien-3-one	0.05485	0.994838	0.98697	317.118	3.252		Benzenoids	Phenol ethers	Anisoles	C19H18O3	IOZVKDXPBWBUKY-LQIBPGRFSA-N	COC1=CC=C(C=CC(=O)C=CC2=CC=C(OC)C=C2)C=C1	6319.32	4165.69	2829.37	3743.28	3484.81	6155.39
POS_20707	[M+Na]+	(1R,2R,3R,3aS,5aS,6R,7R,10R,10aR,10cR)-1,2,6,7-Tetrahydroxy-3,7,10a,10c-tetramethyl-4-oxo-2,3,3a,4,5a,6,6a,7,10,10a,10b,10c-dodecahydro-1H-phenanthro[10,1-bc]furan-10-yl beta-D-glucopyranoside	0.0287898	1.00989	0.958781	553.225	4.777		Lipids and lipid-like molecules	Prenol lipids	Terpene lactones	C25H38O12	TYXFVKGQQWDJKA-YFXVJPQZSA-N	CC1C(O)C(O)C2C3(C)C(OC4OC(CO)C(O)C(O)C4O)C=CC(C)(O)C3C(O)C5OC(=O)C1C25C	16857.9	15814.5	10182.4	16241.3	11305.3	14888.7
POS_4957	[M-H2O+H]+	(1R,2R,4aS,8aS)-2-[(2R)-2-Hydroxybutyl]-1,3-dimethyl-1,2,4a,5,6,7,8,8a-octahydro-1-naphthalenecarboxylic acid	0.270389	0.907428	0.591856	263.198	9.688		Organic oxygen compounds	Organooxygen compounds	Alcohols and polyols	C17H28O3	HIVVBTLNCFFLPO-LVNYTYFRSA-N	CC[C@@H](O)C[C@@H]1C(=C[C@@H]2CCCC[C@@H]2[C@@]1(C)C(O)=O)C	69303.5	89996.3	82947.3	111012	66717	89231.2
POS_16796	[M+Na]+	(1R,2S,4R,5R)-5-Hydroxy-1,7,7-trimethylbicyclo[2.2.1]hept-2-yl 6-O-[(2R,3R,4R)-tetrahydro-3,4-dihydroxy-4-(hydroxymethyl)-2-furanyl]-beta-D-glucopyranoside	0.820208	10.7246	0.379411	487.212	5.602		Lipids and lipid-like molecules	Prenol lipids	Terpene glycosides	C21H36O11	BVEVSYQMQABMQM-UHFFFAOYSA-N	CC1(C)C2CC(OC3OC(COC4OCC(O)(CO)C4O)C(O)C(O)C3O)C1(C)CC2O	268301	9022.87	6445.28	8357.32	12165.8	5936.41
POS_22342	[M+Na]+	(1R,3aR,3bS,4aR,6S,7S,7aR,8R,8aR,9aR)-1,4a,8-tris(acetyloxy)-2,2,3b,6,8a-pentamethyl-4,9-dioxo-tetradecahydro-1H-cyclopenta[a]s-indacen-7-yl butanoate	0.162459	2.46052	0.445053	585.246	5.937		Lipids and lipid-like molecules	Prenol lipids	Diterpenoids	C30H42O10	JQCBBCVOQHOGTI-HROOPKDASA-N	CCCC(=O)OC1C(C)CC2(OC(C)=O)C1C(OC(C)=O)C3(C)C(=O)C4C(CC(C)(C)C4OC(C)=O)C3(C)C2=O	14126.5	2090.07	1596.51	3907.97	1734.69	1596.9
POS_14824	[M-H2O+H]+	(1R,3aS,5aR,5bR,11aR,13aR)-7-hydroxy-5a,5b,8,8,11a-pentamethyl-9-oxo-1-prop-1-en-2-yl-2,3,4,5,6,7,7a,10,11,11b,12,13,13a,13b-tetradecahydro-1H-cyclopenta[a]chrysene-3a-carboxylic acid	2.092	0.988721	0.975357	453.336	8.951		Lipids and lipid-like molecules	Prenol lipids	Triterpenoids	C30H46O4	FIADIPXEFYWJQV-POYRUVRTSA-N	CC(=C)C1CCC2(CCC3(C)C(CCC4C5(C)CCC(=O)C(C)(C)C5C(O)CC34C)C12)C(O)=O	4.59868e+06	4.08308e+06	1.68544e+06	1.92918e+06	4.03152e+06	4.52477e+06
POS_21133	[M+Na]+	(1S,4aS,7S,7aS)-1-[(2S,3R,4S,5S,6R)-6-[[(E)-3-(3,4-dihydroxyphenyl)prop-2-enoyl]oxymethyl]-3,4,5-trihydroxyoxan-2-yl]oxy-7-hydroxy-7-methyl-4a,5,6,7a-tetrahydro-1H-cyclopenta[c]pyran-4-carboxylic acid	0.274805	1.01062	0.986826	561.155	5.07		Lipids and lipid-like molecules	Prenol lipids	Terpene glycosides	C25H30O13	AEBORMNUOJEQOL-OWDFILOBSA-N	CC1(O)CCC2C1C(OC=C2C(O)=O)OC3OC(COC(=O)C=CC4=CC=C(O)C(=C4)O)C(O)C(O)C3O	43838.3	117073	28448.2	24419.4	50668.9	112281
POS_1226	[M+H]+	(1S,4R)-(+)-Fenchone	0.30756	1.29591	0.464231	153.126	6.239		Lipids and lipid-like molecules	Prenol lipids	Monoterpenoids		LHXDLQBQYFFVNW-XCBNKYQSSA-N	CC1(C)[C@@H]2CC[C@@](C)(C2)C1=O	111156	64471.3	43375.9	65836.3	49358	53800.8
POS_18883	[M+H]+	(2-Hydroxy-3-octadec-9-enoyloxypropyl) 2-(trimethylazaniumyl)ethyl phosphate	0.497218	1.10864	0.707701	522.352	11.117		Lipids and lipid-like molecules	Glycerophospholipids	Glycerophosphocholines	C26H52NO7P	YAMUFBLWGFFICM-UHFFFAOYSA-N	CCCCCCCCC=CCCCCCCCC(=O)OCC(O)CO[P]([O-])(=O)OCC[N+](C)(C)C	1.18895e+06	1.02802e+06	502434	748070	736849	968012
POS_18617	[M+H]+	(2-Hydroxy-3-octadeca-6,9,12-trienoyloxypropyl) 2-(trimethylazaniumyl)ethyl phosphate	1.79424	1.88845	0.48288	518.325	10.313		Lipids and lipid-like molecules	Glycerophospholipids	Glycerophosphocholines	C26H48NO7P	MRTUWVDDQVMUCR-UHFFFAOYSA-N	CCCCCC=CCC=CCC=CCCCCC(=O)OCC(O)CO[P]([O-])(=O)OCC[N+](C)(C)C	2.1538e+06	476487	309303	447911	400270	708429
POS_9248	[M+Na]+	(2,6,6-Trimethyl-4-oxo-2-cyclohexen-1-yl)methyl beta-D-glucopyranoside	0.0473093	1.11208	0.672885	353.155	4.54		Organic oxygen compounds	Organooxygen compounds	Carbohydrates and carbohydrate conjugates	C16H26O7	FOONTNRMWNJWCL-ZSABPLCXSA-N	CC1=CC(=O)CC(C)(C)C1CO[C@@H]2O[C@H](CO)[C@@H](O)[C@H](O)[C@H]2O	11434.9	23199.3	14461.5	13125.6	16011.3	15010.7
POS_14818	[M-H2O+H]+	(23E)-5,25-Dihydroxy-4,4-dimethylergosta-8,23-diene-3,22-dione	1.91319	5.28449	0.436562	453.334	11.905		Lipids and lipid-like molecules	Steroids and steroid derivatives	Bile acids, alcohols and derivatives	C30H46O4	MRQHSVZGPFMNOJ-ISLYRVAYSA-N	CC(C1CCC2C3=C(CCC12C)C4(C)CCC(=O)C(C)(C)C4(O)CC3)C(=O)\\C=C(/C)C(C)(C)O	1.6825e+06	53728.5	18417.6	90229.6	143978	97829.7
POS_12488	[M-2H2O+H]+	(25S)-3alpha,7alpha,12alpha-Trihydroxy-5beta-cholestan-26-oic acid	2.85836	0.890988	0.48415	415.321	10.276		Lipids and lipid-like molecules	Steroids and steroid derivatives	Bile acids, alcohols and derivatives	C27H46O5	CNWPIIOQKZNXBB-TVOMGIAASA-N	C[C@H](CCC[C@H](C)C(O)=O)[C@H]1CC[C@H]2[C@@H]3[C@H](O)C[C@@H]4C[C@H](O)CC[C@]4(C)[C@H]3C[C@H](O)[C@]12C	5.21898e+06	7.46616e+06	6.18274e+06	8.57439e+06	6.32911e+06	6.27286e+06
POS_4506	[M+H]+	(2E,4E)-N-(2-Methylpropyl)dodeca-2,4-dienamide	0.610302	1.69264	0.30288	252.229	10.367		Lipids and lipid-like molecules	Fatty Acyls	Fatty amides	C16H29NO	BBRMJCAPNGJKEM-AQASXUMVSA-N	CCCCCCCC=CC=CC(O)=NCC(C)C	286370	474103	127696	218317	161189	145217
POS_7795	[M+H]+	(2E)-4-{Methyl[3-phenyl-3-(pyridin-2-yl)propyl]amino}-4-oxobut-2-enoic acid	0.547007	1.32018	0.707715	325.142	6.412		Organoheterocyclic compounds	Pyridines and derivatives	Pheniramines	C19H20N2O3	NQGDWANJMZMGLN-ZHACJKMWSA-N	CN(CCC(C1=CC=CC=C1)C2=NC=CC=C2)C(=O)\\C=C\\C(O)=O	23609.1	563908	224045	278259	137153	199326
POS_14396	[M+Na]+	(2E)-4-Hydroxy-3,4-dimethyl-2-penten-1-yl 6-O-[(2S,3R,4R)-3,4-dihydroxy-4-(hydroxymethyl)tetrahydro-2-furanyl]-beta-D-glucopyranoside	0.241631	1.6282	0.136584	447.178	3.507		Lipids and lipid-like molecules	Fatty Acyls	Fatty acyl glycosides	C18H32O11	FEGXTMHRTZJSIG-MVXUSQBOSA-N	C\\C(=C/CO[C@@H]1O[C@H](CO[C@H]2OC[C@](O)(CO)[C@H]2O)[C@@H](O)[C@H](O)[C@H]1O)C(C)(C)O	33292.3	24629.4	16651.7	13970.4	12860.1	18970.6
POS_14648	[M+H]+	(2R,2S)-Eriodictyol 7-O-beta-D-glucoside	0.101345	0.479987	0.386807	451.122	4.406		Phenylpropanoids and polyketides	Flavonoids	Flavonoid glycosides	C21H22O11	RAFHNDRXYHOLSH-RGHIGTIISA-N	OCC1OC(OC2=CC(=C3C(=O)CC(OC3=C2)C4=CC(=C(O)C=C4)O)O)C(O)C(O)C1O	339.134	1700.4	989.657	572.054	1608.66	4130.29
POS_20096	[M+Na]+	(2R,3E)-4-[(1S,6R)-1-Hydroxy-2,2,6-trimethyl-4-oxocyclohexyl]-3-buten-2-yl 6-O-beta-D-xylopyranosyl-beta-D-glucopyranoside	0.18976	1.9523	0.19245	543.238	5.005		Lipids and lipid-like molecules	Fatty Acyls	Fatty acyl glycosides	C24H40O12	IXQBRUSHWUDFSM-RJGCIVIHSA-N	C[C@@H](O[C@@H]1O[C@H](CO[C@@H]2OC[C@@H](O)[C@H](O)[C@H]2O)[C@@H](O)[C@H](O)[C@H]1O)\\C=C\\[C@@]3(O)[C@H](C)CC(=O)CC3(C)C	14125.7	49327.6	36829.3	16366.2	20032.2	14968
POS_15741	[M+Na]+	(2R,3R,4S,5S,6R)-2-[2-(4-Methoxyphenyl)ethoxy]-6-[[(2S,3R,4S,5S)-3,4,5-trihydroxyoxan-2-yl]oxymethyl]oxane-3,4,5-triol	0.401117	2.8491	0.394881	469.165	4.91		Organic oxygen compounds	Organooxygen compounds	Carbohydrates and carbohydrate conjugates	C20H30O11	LQUPEGJECBPTCO-KDRUZJHHSA-N	COC1=CC=C(CCOC2OC(COC3OCC(O)C(O)C3O)C(O)C(O)C2O)C=C1	76761.5	12021.2	8851.65	8524.82	13749.1	11994.5
POS_9106	[M+NH4]+	(2R,3S,4S,5R,6S)-2-(hydroxymethyl)-6-[4-(hydroxymethyl)-1-propan-2-ylcyclohex-3-en-1-yl]oxyoxane-3,4,5-triol	0.0629413	0.815729	0.428501	350.214	3.749		Lipids and lipid-like molecules	Prenol lipids	Terpene glycosides	C16H28O7	WBDMFFSFFQSHFV-MUGRSDNVSA-N	CC(C)C1(CCC(=CC1)CO)OC2OC(CO)C(O)C(O)C2O	1397.16	2514.24	1120.24	2069.32	2155.33	1943.64
POS_5344	[M+H]+	(2r)-1-(2,4-Dihydroxyphenyl)-2-(4-methoxyphenyl)propan-1-one	0.193442	0.655249	0.0571211	273.111	7.581		Phenylpropanoids and polyketides	Alpha-methyldeoxybenzoin flavonoids		C16H16O4	CCOJFDRSZSSKOG-SNVBAGLBSA-N	COC1=CC=C(C=C1)C(C)C(=O)C2=CC=C(O)C=C2O	10307.2	8699.55	6608.54	12137.6	11332.9	15621.9
POS_6321	[M-H2O+H]+	(2R)-1-(5-Hydroxy-3-methylpentyl)-2,5,5,8a-tetramethyldecahydro-2-naphthalenol	1.15005	1.33317	0.431226	293.284	11.817		Lipids and lipid-like molecules	Prenol lipids	Diterpenoids	C20H38O2	MCHQEVJMCLOQAZ-AKMRJOLWSA-N	CC(CCO)CCC1[C@](C)(O)CCC2C(C)(C)CCCC12C	2.27985e+06	2.58999e+06	911460	1.63177e+06	1.64599e+06	1.05872e+06
POS_30057	[M+Na]+	(2S,3R,4S,5S,6R)-2-[4-[(3S,3aR,6S,6aR)-6-[3,5-Dimethoxy-4-[(2S,3R,4S,5S,6R)-3,4,5-trihydroxy-6-(hydroxymethyl)oxan-2-yl]oxyphenyl]-1,3,3a,4,6,6a-hexahydrofuro[3,4-c]furan-3-yl]-2,6-dimethoxyphenoxy]-6-(hydroxymethyl)oxane-3,4,5-triol	0.219626	0.674844	0.465657	765.255	4.318		Lignans, neolignans and related compounds	Lignan glycosides		C34H46O18	FFDULTAFAQRACT-XKBSQSBASA-N	COC1=C(OC2OC(CO)C(O)C(O)C2O)C(=CC(=C1)C3OCC4C3COC4C5=CC(=C(OC6OC(CO)C(O)C(O)C6O)C(=C5)OC)OC)OC	58.9431	21802	11902.6	16836.4	20771.1	12424.1
POS_16825	[M+Na]+	(2S,3R,5R,10R,13R,14S,17R)-17-[(2S,3R)-3,6-Dihydroxy-6-methylheptan-2-yl]-2,3,14-trihydroxy-10,13-dimethyl-2,3,4,5,9,11,12,15,16,17-decahydro-1H-cyclopenta[a]phenanthren-6-one	0.120345	0.97991	0.960894	487.301	9.601		Lipids and lipid-like molecules	Steroids and steroid derivatives	Bile acids, alcohols and derivatives	C27H44O6	UPEZCKBFRMILAV-DBDKQAFGSA-N	C[C@H]([C@H](O)CCC(C)(C)O)[C@H]1CC[C@@]2(O)C3=CC(=O)[C@@H]4C[C@@H](O)[C@@H](O)C[C@]4(C)C3CC[C@]12C	96247.5	85419.1	55759.7	61406.1	137150	43737.9
POS_19035	[M+Na]+	(2S,3S,9R,13R,14S,16R)-2,3,16-Trihydroxy-17-[(2R)-2-hydroxy-6-methyl-3-oxohept-6-en-2-yl]-4,4,9,13,14-pentamethyl-1,2,3,7,8,10,12,15,16,17-decahydrocyclopenta[a]phenanthren-11-one	0.510031	0.494432	0.152106	525.315	9.51		Lipids and lipid-like molecules	Steroids and steroid derivatives	Cucurbitacins	C30H46O6	JQKLZAQSMGFZSI-NRFHFCOISA-N	CC(=C)CCC(=O)[C@](C)(O)C1[C@H](O)C[C@@]2(C)C3CC=C4C(C[C@H](O)[C@@H](O)C4(C)C)[C@]3(C)C(=O)C[C@]12C	39659.8	51430.6	16658.1	49143.3	108268	60513.2
POS_11551	[M+K]+	(2S,3S)-3-Decyl-2-hydroxy-2-(3-methoxy-3-oxopropyl)butanedioic acid	1.94844	0.63513	0.158311	399.181	7.975		Organic acids and derivatives	Carboxylic acids and derivatives	Tricarboxylic acids and derivatives	C18H32O7	GTLYLWQDKQVONL-KDOFPFPSSA-N	CCCCCCCCCC[C@H](C(O)=O)[C@@](O)(CCC(=O)OC)C(O)=O	1.80389e+06	1.05744e+06	538723	1.75261e+06	1.66362e+06	1.93708e+06
POS_1777	[M+H]+	(2S)-2-Azaniumyl-5-(ethylamino)-5-oxopentanoate	0.099268	0.997386	0.994674	175.107	1.25		Organic acids and derivatives	Carboxylic acids and derivatives	Amino acids, peptides, and analogues	C7H14N2O3	DATAGRPVKZEWHA-YFKPBYRVSA-N	CCN=C(O)CCC(N)C(O)=O	10838.9	3701.94	6990.29	4402.65	7029.29	10155.6
POS_11097	[M+Na]+	(2S)-8-[(E)-3-Hydroxy-3-methylbut-1-enyl]-5,7-dimethoxy-2-phenyl-2,3-dihydrochromen-4-one	0.548778	0.828868	0.765097	391.157	3.151		Phenylpropanoids and polyketides	Flavonoids	O-methylated flavonoids	C22H24O5	DKYFESWWIPJYTA-DVQDXYAYSA-N	COC1=C(C=CC(C)(C)O)C2=C(C(=O)CC(O2)C3=CC=CC=C3)C(=C1)OC	1083.32	266883	110825	109336	200323	147339
POS_13509	[M+Na]+	(2S)‐2‐(2‐aminoacetamido)‐3‐(4‐cyanophenyl)‐N‐(9H‐fluoren‐2‐yl)propanamide	0.0258198	1.18008	0.720554	433.161	4.298		Organic acids and derivatives	Carboxylic acids and derivatives	Amino acids, peptides, and analogues	C25H22N4O2	WNVKQPTYEZCTFN-QHCPKHFHSA-N	NCC(=O)N[C@@H](CC1=CC=C(C=C1)C#N)C(=O)NC2=CC3=C(C=C2)C4=C(C3)C=CC=C4	1945.15	7823.01	4402.19	2834.41	5500.64	3672.88
POS_2995	[M+H]+	(2z)-1-[(6-Chloropyridin-3-Yl)methyl]imidazolidin-2-Imine	0.0481157	0.532182	0.285391	211.072	3.035		Organoheterocyclic compounds	Pyridines and derivatives	Halopyridines	C9H11ClN4	UEQZFAGVRGWPDK-UHFFFAOYSA-N	NC1=NCCN1CC2=CC=C(Cl)N=C2	236.146	460.01	190.712	192.389	854.486	619.6
POS_20559	[2M+Na]+	(3aR,6R,7aR)-6-Methyl-3-methylidene-6-(4-oxopentyl)-3a,4,7,7a-tetrahydro-1-benzofuran-2,5-dione	0.0715404	1.18966	0.432154	551.259	5.577		Organoheterocyclic compounds	Benzofurans		C15H20O4	MIRSLSRVCIOISZ-LALPHHSUSA-N	CC(=O)CCC[C@]1(C)C[C@H]2OC(=O)C(=C)[C@H]2CC1=O	86014.2	122483	69834.8	79962.2	65514.9	88481.6
POS_12262	[M+H-H2O]+	(3beta)-28-Norlup-20(29)-ene-3,17-diol	1.24028	0.716129	0.459637	411.36	12.624					C29H46O	QMYGTTSPVRKRJP-UUORKCOBNA-N	OC1CCC2(C)C(CCC3(C)C2CCC4C5C(C(=C)C)CCC5(O)CCC43C)C1(C)C	175297	797864	282239	532760	713885	506392
POS_9906	[M+Na]+	(3S,6R,6As,7S)-6,6a,7,8-tetrahydroxy-3-methyl-3,4,5,6,7,12a-hexahydro-2H-benzo[a]anthracene-1,12-dione	0.0810159	1.12719	0.659134	367.114	8.718		Benzenoids	Tetralins		C19H20O6	PKPHZFVECLENRP-QDWLCUAPSA-N	CC1CC(=O)C2=C(C1)CC(O)C3(O)C(O)C4=C(C=CC=C4O)C(=O)C23	15024.7	7950.28	7707.4	9629.15	8404.05	9187.04
POS_10013	[M+Na]+	(4-Hydroxy-3,5-dimethoxyphenyl)methyl-beta-D-glucopyranoside	1.10046	0.741057	0.616802	369.117	1.706		Organic oxygen compounds	Organooxygen compounds	Carbohydrates and carbohydrate conjugates	C15H22O9	VZSGMNVXQXYFPI-UHFFFAOYSA-N	COC1=C(O)C(=CC(=C1)COC2OC(CO)C(O)C(O)C2O)OC	58598.1	536335	359701	729576	301259	257372
POS_10922	[M+H]+	(4R)-4-[(E)-4-Hydroxy-3-[(2R,3R,4S,5S,6R)-3,4,5-trihydroxy-6-(hydroxymethyl)oxan-2-yl]oxybut-1-enyl]-3,5,5-trimethylcyclohex-2-en-1-one	0.528976	5.60963	0.00220195	387.2	4.55		Lipids and lipid-like molecules	Fatty Acyls	Fatty acyl glycosides	C19H30O8	PYYCXUBJCCEGKB-SNPWQJEQSA-N	CC1=CC(=O)CC(C)(C)[C@H]1\\C=C\\C(CO)O[C@@H]2O[C@H](CO)[C@@H](O)[C@H](O)[C@H]2O	50911.7	66785	45545.6	8719.56	10167.7	10213.1
POS_8227	[M+Na]+	(4R)-4-Ethenyl-4,10-dimethyl-2-(2-methylprop-1-enyl)-2,3-dihydropyrano[3,2-c]chromen-5-one	0.268975	0.793437	0.617533	333.15	3.468		Phenylpropanoids and polyketides	Coumarins and derivatives	Pyranocoumarins	C20H22O3	NJVADEFPOCMONF-LGTGAQBVSA-N	CC(C)=CC1C[C@](C)(C=C)C2=C(O1)C3=C(C)C=CC=C3OC2=O	2655.8	44887.3	29248.9	32685.1	32029.2	32069.7
POS_14270	[M+H]+	(4S,4Ar,5S,5aR,6R,12aS)-4-(dimethylamino)-3,5,10,12,12a-pentahydroxy-6-methyl-1,11-dioxo-1,4,4a,5,5a,6,11,12a-octahydrotetracene-2-carboxamide	0.068604	0.783907	0.753225	445.159	5.179		Phenylpropanoids and polyketides	Tetracyclines		C22H24N2O8	SGKRLCUYIXIAHR-UHFFFAOYSA-N	CC1C2C(O)C3C(N(C)C)C(=O)C(=C(O)C3(O)C(=O)C2=C(O)C4=C1C=CC=C4O)C(N)=O	34695.4	8767.29	4015.52	37133.8	15646.1	7786.32
POS_4001	[M+H]+	(4S,4aR)-4-(Hydroxymethyl)-3,4a,8,8-tetramethyl-4a,5,6,7,8,8a-hexahydro-1(4H)-naphthalenone	0.625643	1.06955	0.892735	237.185	7.736		Organic oxygen compounds	Organooxygen compounds	Carbonyl compounds	C15H24O2	CDVMOSRXPDTXBF-LKVSRFHLSA-N	CC1=CC(=O)C2C(C)(C)CCC[C@]2(C)[C@H]1CO	1.0741e+06	234892	515308	803799	508706	393170
POS_5286	[M-H2O+H]+	(5xi,9xi)-Beyer-15-en-18-ol	0.136042	0.932848	0.878672	271.24	12.679		Lipids and lipid-like molecules	Prenol lipids	Diterpenoids	C20H32O	CIGQQQTZOIDQQR-SGWMQEFOSA-N	CC12CCC3C4(C)CCCC(C)(CO)C4CCC3(C1)C=C2	29707.8	54921.1	10965	29995.5	46091.7	26388.2
POS_13162	[M+H]+	(6beta,22E)-6-Hydroxystigmasta-4,22-dien-3-one	1.55043	2.20626	0.441374	427.353	12.477					C29H46O2	FFKIQLXJMQUBQZ-CMDGGOBGNA-N	O=C1C=C2C(O)CC3C(CCC4(C)C(CCC34)C(C=CC(CC)C(C)C)C)C2(C)CC1	1.35375e+06	288786	153684	195825	377961	240359
POS_10604	[M+K]+	(7E,13E)-9,15-Dihydroxy-4,10,16-trimethyl-1,5,11-trioxacyclohexadeca-7,13-diene-2,6,12-trione	0.228501	0.851122	0.457418	381.096	3.727		Phenylpropanoids and polyketides	Macrolides and analogues		C16H22O8	MJMMUATWVTYSFD-YDFGWWAZSA-N	CC1CC(=O)OC(C)C(O)C=CC(=O)OC(C)C(O)C=CC(=O)O1	85215.7	53711.7	44622.6	74243	63568.1	77845.5
POS_20734	[M+H]+	(all-E)-beta-Cryptoxanthin	0.102357	0.960806	0.929779	553.294	8.828		Lipids and lipid-like molecules	Prenol lipids	Tetraterpenoids	C40H56O	DMASLKHVQRHNES-FKKUPVFPSA-N	CC(=CC=CC=C(C)C=CC=C(C)C=CC1=C(C)CC(O)CC1(C)C)C=CC=C(C)C=CC2=C(C)CCCC2(C)C	11311.4	7081.82	6132.44	3502.26	14406.2	7617.63
POS_14828	[M-H2O+H]+	(E,6S)-7-Hydroxy-2-methyl-6-[(10S,13S,14S,17S)-4,4,10,13,14-pentamethyl-3-oxo-1,2,5,6,7,11,12,15,16,17-decahydrocyclopenta[a]phenanthren-17-yl]hept-2-enoic acid	1.64116	0.773363	0.730905	453.339	11.737		Lipids and lipid-like molecules	Prenol lipids	Triterpenoids	C30H46O4	RLTDMRMWVUCOAI-BOVQQMIFSA-N	CC(=CCCC(CO)C1CCC2(C)C3=C(CCC12C)C4(C)CCC(=O)C(C)(C)C4CC3)C(O)=O	46669.3	1.89927e+06	482166	413915	1.40478e+06	1.32098e+06
POS_6651	[M+H]+	(E)-1-(3,4-Dihydroxy-2,6-dimethoxyphenyl)-3-phenylprop-2-en-1-one	0.578461	1.966	0.474694	301.105	6.267		Phenylpropanoids and polyketides	Linear 1,3-diarylpropanoids	Cinnamylphenols	C17H16O5	VMTHPSSNJFUGBF-CMDGGOBGSA-N	COC1=CC(=C(O)C(=C1C(=O)C=CC2=CC=CC=C2)OC)O	214207	54886.6	21826.3	26841.7	58409.3	62724.5
POS_12650	[M+Na]+	(E)-3-(4-Methoxyphenyl)-1-[2,4,6-trimethoxy-3-(3-methylbut-2-enyl)phenyl]prop-2-en-1-one	0.805256	0.606484	0.225434	419.185	5.208		Phenylpropanoids and polyketides	Linear 1,3-diarylpropanoids	Chalcones and dihydrochalcones	C24H28O5	GGNVSANPVOEGII-GXDHUFHOSA-N	COC1=CC=C(C=CC(=O)C2=C(OC)C=C(OC)C(=C2OC)CC=C(C)C)C=C1	12929.2	167741	144390	173993	165176	196806
POS_13122	[M+K]+	(E)-3-[3-Methoxy-4-[1-(3,4,5-trimethoxyphenyl)propan-2-yloxy]phenyl]prop-2-en-1-ol	0.0468722	0.883772	0.766729	427.158	2.861		Phenylpropanoids and polyketides	Cinnamyl alcohols		C22H28O6	CZVGIALASULOAU-VOTSOKGWSA-N	COC1=C(OC(C)CC2=CC(=C(OC)C(=C2)OC)OC)C=CC(=C1)\\C=C\\CO	7089.1	5647.5	3429.66	4823.31	9948.37	3520.66
POS_7980	[M+NH4]+	(E)-4-[(1R,2S,3S,4R,8As)-2,3,4-trihydroxy-2,5,5,8a-tetramethyl-3,4,4a,6,7,8-hexahydro-1H-naphthalen-1-yl]but-3-en-2-one	0.463799	0.643051	0.278031	328.244	7.849		Lipids and lipid-like molecules	Prenol lipids	Sesquiterpenoids	C18H30O4	GUVJPXABQYFWPD-GSZDNMEJSA-N	CC(=O)C=CC1C(C)(O)C(O)C(O)C2C(C)(C)CCCC12C	102972	77706.1	44946.7	129893	61995	158977
POS_5188	[M+NH4]+	(E)-7-Methylidene-10-oxo-4-propan-2-ylundec-5-enoic acid	0.321889	1.34818	0.554711	270.202	6.82		Lipids and lipid-like molecules	Fatty Acyls	Fatty acids and conjugates	C15H24O3	BPCRVQOBIAIVSF-SOFGYWHQSA-N	CC(C)C(CCC(O)=O)\\C=C\\C(=C)CCC(C)=O	128625	64849.3	28182.3	58820.3	59059.7	46531.5
POS_1952	[M+H]+	(R)-3-Amino-4-phenylbutanoic acid	0.127565	0.343616	0.261939	180.103	1.698		Organic acids and derivatives	Carboxylic acids and derivatives	Amino acids, peptides, and analogues	C10H13NO2	OFVBLKINTLPEGH-SECBINFHSA-N	NC(CC(O)=O)CC1=CC=CC=C1	2029.11	835.486	530.093	411.877	5907.78	3559.65
POS_23520	[M+H]+	(S)-7-(((2-O-6-Deoxy-alpha-L-mannopyranosyl)-beta-D-glucopyranosyl)oxy)-2,3-dihydro-5-hydroxy-2-(3-hydroxy-4-methoxyphenyl)-4H-1-benzopyran-4-one	0.395521	0.494616	0.259287	611.462	13.168		Phenylpropanoids and polyketides	Flavonoids	Flavonoid glycosides	C28H34O15	ARGKVCXINMKCAZ-UZRWAPQLSA-N	COC1=CC=C(C=C1O)[C@@H]2CC(=O)C3=C(O)C=C(O[C@@H]4O[C@H](CO)[C@@H](O)[C@H](O)[C@H]4O[C@@H]5O[C@@H](C)[C@H](O)[C@@H](O)[C@H]5O)C=C3O2	4187.44	32467.6	26113.4	69756	25536.4	31610.9
POS_1583	[M+H]+	(S)-Suspensaside	0.295606	1.23518	0.272758	167.07	3.279		Organic oxygen compounds	Organooxygen compounds	Carbonyl compounds	C9H10O3	UILPJVPSNHJFIK-UHFFFAOYSA-N	COC1=CC=C(C(C)=O)C(=C1)O	176070	205485	120991	140485	138943	127430
POS_15748	[M+Na]+	(Z)-2,6-Dimethyl-7-(4-methyl-5-oxooxolan-2-yl)-3-[[3,4,5-trihydroxy-6-(hydroxymethyl)oxan-2-yl]oxymethyl]hept-5-enoic acid	0.0355152	0.814208	0.690767	469.205	6.231		Lipids and lipid-like molecules	Saccharolipids		C21H34O10	QOIHIEPXTNMSSM-WMZJFQQLSA-N	CC1CC(CC(C)=CCC(COC2OC(CO)C(O)C(O)C2O)C(C)C(O)=O)OC1=O	5090.67	4754.45	1686.53	4738.38	7726.86	1697.79
POS_12547	[M+Na]+	(Z)-3-Hexenylvicianoside	0.903584	0.661165	0.415911	417.171	4.534		Lipids and lipid-like molecules	Fatty Acyls	Fatty acyl glycosides	C17H30O10	NVTNXPADRDASMP-BHELATFJSA-N	CC\\C=C/CCO[C@@H]1O[C@H](CO[C@@H]2OC[C@H](O)[C@H](O)[C@H]2O)[C@@H](O)[C@H](O)[C@H]1O	8756.77	291428	169340	182380	229684	298082
POS_30588	[M+Na]+	[(1R,3R,10S,13R,14S,17R)-3-[(2R)-5-(3,5-dihydroxy-4-methoxy-6-methyloxan-2-yl)oxy-3,4-dihydroxy-6-(hydroxymethyl)oxan-2-yl]oxy-14-hydroxy-10,13-dimethyl-17-(5-oxo-2H-furan-3-yl)-1,2,3,4,5,6,7,8,9,11,12,15,16,17-tetradecahydrocyclopenta[a]phenanthren-1-yl] acetate	0.0565281	1.50962	0.18872	777.368	7.463		Lipids and lipid-like molecules	Steroids and steroid derivatives	Steroid lactones	C38H58O15	XWYDFNHNSVTJFP-CSVIMRPTSA-N	COC1C(O)C(C)OC(OC2C(O)C(O)C(OC3CC4CCC5C(CCC6(C)C(CCC56O)C7=CC(=O)OC7)C4(C)C(C3)OC(C)=O)OC2CO)C1O	3145.93	3527.79	2551.17	1297.76	3205.86	1607.12
POS_23496	[M+Na]+	[(1S,2R,4S,9R,10R,14S,15S,17S)-9-(Furan-3-yl)-1-hydroxy-15-[(1R)-1-hydroxy-2-methoxy-2-oxoethyl]-10,14,16,16-tetramethyl-7,18-dioxo-3,8-dioxapentacyclo[12.3.1.02,4.04,13.05,10]octadecan-17-yl] 2-methylpropanoate	0.157552	1.28476	0.623841	611.241	5.802		Lipids and lipid-like molecules	Prenol lipids	Triterpenoids	C31H40O11	ADDLXGZBTXNVDS-OFNFSOOGSA-N	COC(=O)[C@H](O)[C@H]1C(C)(C)[C@H](OC(=O)C(C)C)[C@]2(O)[C@H]3O[C@@]34C(CC[C@]5(C)C4CC(=O)O[C@H]5C6=COC=C6)[C@@]1(C)C2=O	35087.7	17745.7	6979.97	13066.2	18337.3	15152.5
POS_13625	[M+Na]+	[(2R,3R,4S,5R,6R)-3,5-Dihydroxy-2-(hydroxymethyl)-6-[(2R,3R,4S,5S,6R)-3,4,5-trihydroxy-6-(hydroxymethyl)oxan-2-yl]oxyoxan-4-yl] 2-methylpropanoate	0.179161	0.290169	0.0496754	435.146	1.837		Organic oxygen compounds	Organooxygen compounds	Carbohydrates and carbohydrate conjugates	C16H28O12	QVYMNCVNZVHQEC-HPBJJQKWSA-N	CC(C)C(=O)O[C@H]1[C@H](O)[C@@H](CO)O[C@H](O[C@H]2O[C@H](CO)[C@@H](O)[C@H](O)[C@H]2O)[C@@H]1O	332.869	2939	1162.11	3245.53	6871.92	5163.21
POS_27907	[M+Na]+	[(2R,3R,4S,5S,6R)-3-Acetyloxy-2-(acetyloxymethyl)-5-hexanoyloxy-6-[(2S,3R)-2,3,4-trihydroxybutoxy]oxan-4-yl] 14-hydroxytetradecanoate	0.253816	0.621965	0.286049	715.384	8.135		Lipids and lipid-like molecules	Saccharolipids		C34H60O14	QYCCCSUFDHWKRW-KSHKLCIXSA-N	CCCCCC(=O)OC1C(OCC(O)C(O)CO)OC(COC(C)=O)C(OC(C)=O)C1OC(=O)CCCCCCCCCCCCCO	5541.66	23365.8	8104.6	21562.5	23020.5	14925.3
POS_14515	[M+Na]+	[(2R,3R,4S,5S,6R)-4,5-dihydroxy-6-(hydroxymethyl)-2-[(2R,3R,4S,5S,6R)-3,4,5-trihydroxy-6-(hydroxymethyl)oxan-2-yl]oxyoxan-3-yl] 2-methylbutanoate	0.175002	0.569137	0.172225	449.159	3.363		Lipids and lipid-like molecules	Saccharolipids	Acyltrehaloses	C17H30O12	FNVXTGOURNXUCQ-NVGKCVISSA-N	CCC(C)C(=O)O[C@@H]1[C@@H](O)[C@H](O)[C@@H](CO)O[C@@H]1O[C@H]2O[C@H](CO)[C@@H](O)[C@H](O)[C@H]2O	1078.06	6523.34	5260.6	6628.86	6332.63	9637.64
POS_26771	[M+Na]+	[(2R,3S,4S,5R,6R)-6-[1,7-Bis(4-hydroxyphenyl)-5-oxoheptan-3-yl]oxy-3,4,5-trihydroxyoxan-2-yl]methyl (E)-3-(3,4-dimethoxyphenyl)prop-2-enoate	0.119452	0.789195	0.350883	689.237	4.24		Phenylpropanoids and polyketides	Diarylheptanoids	Linear diarylheptanoids	C36H42O12	FRZOQPPWSKEZAA-QBZXRRNTSA-N	COC1=CC=C(C=CC(=O)OCC2OC(OC(CCC3=CC=C(O)C=C3)CC(=O)CCC4=CC=C(O)C=C4)C(O)C(O)C2O)C=C1OC	5863.61	5729.01	3442.48	4357.89	7365.05	7328.24
POS_18662	[M+Na]+	[(2R,3S,4S,5R,6S)-3,4,5-Trihydroxy-6-[(2S,3R,4S,5S,6R)-3,4,5-trihydroxy-6-(hydroxymethyl)oxan-2-yl]oxyoxan-2-yl]methyl 8-methylnonanoate	0.140592	1.11979	0.722533	519.237	4.983		Lipids and lipid-like molecules	Saccharolipids		C22H40O12	QEGXBXBKQLQOHP-HSZKHKTISA-N	CC(C)CCCCCCC(=O)OC[C@H]1O[C@@H](O[C@@H]2O[C@H](CO)[C@@H](O)[C@H](O)[C@H]2O)[C@H](O)[C@@H](O)[C@@H]1O	23958.2	23611.5	14971.5	28737.5	13471.9	13641.5
POS_28251	[M+H]+	[(2R)-2,3-Di(hexadecanoyloxy)propyl] 2,3-dihydroxypropyl phosphate	0.52937	0.791889	0.611458	723.517	12.882		Lipids and lipid-like molecules	Glycerophospholipids	Glycerophosphoglycerols	C38H75O10P	BIABMEZBCHDPBV-TYIYNAFKSA-N	CCCCCCCCCCCCCCCC(=O)OCC(CO[P](O)(=O)OCC(O)CO)OC(=O)CCCCCCCCCCCCCCC	11356.8	184452	222645	202821	173066	152538
POS_9787	[M+NH4]+	[(2S,3R,4S,5S,6R)-3,4,5-Trihydroxy-6-(hydroxymethyl)oxan-2-yl] (2E,6E)-8-hydroxy-2,6-dimethylocta-2,6-dienoate	0.0190907	1.58186	0.654909	364.192	5.106		Lipids and lipid-like molecules	Prenol lipids	Terpene glycosides	C16H26O8	QZIOPOIUZGGXKI-KOYXEPTDSA-N	CC(CCC=C(C)C(=O)OC1OC(CO)C(O)C(O)C1O)=CCO	691.393	5068.56	350.334	1011.14	912.159	1939.41
POS_28968	[M+Na]+	[(E,6R)-6-hydroxy-6-[(8S,9R,10R,13R,14S,17R)-16-hydroxy-4,4,9,13,14-pentamethyl-3,11-dioxo-2-[(2S,3R,4S,5S,6R)-3,4,5-trihydroxy-6-(hydroxymethyl)oxan-2-yl]oxy-8,10,12,15,16,17-hexahydro-7H-cyclopenta[a]phenanthren-17-yl]-2-methyl-5-oxohept-3-en-2-yl] acetate	0.140376	1.74335	0.183902	741.342	8.383		Lipids and lipid-like molecules	Steroids and steroid derivatives	Steroidal glycosides	C38H54O13	QKEJRKXVLGOJMB-LFPZOBASSA-N	CC(=O)OC(C)(C)C=CC(=O)C(C)(O)C1C(O)CC2(C)C3CC=C4C(C=C(OC5OC(CO)C(O)C(O)C5O)C(=O)C4(C)C)C3(C)C(=O)CC12C	9714.42	7223.85	5563.45	4631.42	6871.93	1403.8
POS_13123	[M+Na]+	[1-(3,4-Dihydroxy-5-methoxyphenyl)-7-(3,4-dihydroxyphenyl)heptan-3-yl] acetate	0.129039	1.10076	0.114733	427.17	4.027		Phenylpropanoids and polyketides	Diarylheptanoids	Linear diarylheptanoids	C22H28O7	ISMTYWQWKQRTNM-UHFFFAOYSA-N	COC1=C(O)C(=CC(=C1)CCC(CCCCC2=CC=C(O)C(=C2)O)OC(C)=O)O	229167	230017	217089	217620	210217	186530
POS_13452	[M+ACN+H]+	[1,14-Dihydroxy-8-(hydroxymethyl)-4,12,12,15-tetramethyl-5-oxo-13-tetracyclo[8.5.0.02,6.011,13]pentadeca-3,8-dienyl] acetate	1.25188	1.04072	0.833279	432.238	8.229		Lipids and lipid-like molecules	Prenol lipids	Diterpenoids	C22H30O6	WZYGIALDVOKLLL-UHFFFAOYSA-N	CC1C(O)C2(OC(C)=O)C(C3C=C(CO)CC4C(C=C(C)C4=O)C13O)C2(C)C	2.4561e+06	3.49005e+06	2.25739e+06	3.18889e+06	2.42555e+06	2.26815e+06
POS_11526	[M+Na]+	[1,3-Dihydroxy-1-(7-methoxy-2-oxochromen-6-yl)-3-methylbutan-2-yl] (E)-2-methylbut-2-enoate	0.285367	4.07334	0.349487	399.138	6.172		Phenylpropanoids and polyketides	Coumarins and derivatives		C20H24O7	GFMYIOGFYYHKLA-IZZDOVSWSA-N	COC1=CC2=C(C=CC(=O)O2)C=C1C(O)C(OC(=O)C(C)=CC)C(C)(C)O	34712.6	6556.29	1973.78	3946.59	4838.93	1830.51
POS_28661	[M+Na]+	[17-(2,6-Dihydroxy-6-methyl-3-oxoheptan-2-yl)-3-hydroxy-4,4,9,13,14-pentamethyl-2-[3,4,5-trihydroxy-6-(hydroxymethyl)oxan-2-yl]oxy-2,3,7,8,10,11,12,15,16,17-decahydro-1H-cyclopenta[a]phenanthren-16-yl] acetate	0.358433	0.669119	0.400302	733.406	9.979		Lipids and lipid-like molecules	Steroids and steroid derivatives	Steroidal glycosides	C38H62O12	VJWYQRXPCZNDKS-UHFFFAOYSA-N	CC(=O)OC1CC2(C)C3CC=C4C(CC(OC5OC(CO)C(O)C(O)C5O)C(O)C4(C)C)C3(C)CCC2(C)C1C(C)(O)C(=O)CCC(C)(C)O	1976	46859.9	29736.6	36637.3	33227.5	47561.9
POS_28495	[M+Na]+	[2-[4-Hydroxy-2,5-bis(hydroxymethyl)-3-(2-methylpropanoyloxy)oxolan-2-yl]oxy-6-(hydroxymethyl)-4,5-bis(2-methylpropanoyloxy)oxan-3-yl] decanoate	0.0567343	1.09795	0.888386	729.362	8.924		Lipids and lipid-like molecules	Saccharolipids		C34H58O15	YPZBTERWDWUANF-UHFFFAOYSA-N	CCCCCCCCCC(=O)OC1C(OC(CO)C(OC(=O)C(C)C)C1OC(=O)C(C)C)OC2(CO)OC(CO)C(O)C2OC(=O)C(C)C	1836.18	10176.1	1907.29	4161.28	4307.29	4209.26
POS_29064	[M+Na]+	[2-[4-Hydroxy-2,5-bis(hydroxymethyl)-3-(3-methylbutanoyloxy)oxolan-2-yl]oxy-6-(hydroxymethyl)-4,5-bis(2-methylpropanoyloxy)oxan-3-yl] decanoate	0.236122	0.728063	0.356918	743.378	8.013		Lipids and lipid-like molecules	Saccharolipids		C35H60O15	LOTLMZWGLBOKFL-UHFFFAOYSA-N	CCCCCCCCCC(=O)OC1C(OC(CO)C(OC(=O)C(C)C)C1OC(=O)C(C)C)OC2(CO)OC(CO)C(O)C2OC(=O)CC(C)C	10524.6	23818.1	18028.5	33822.9	19899.3	18209.9
POS_14883	[M+K]+	[3-Hydroxy-1-(4-methoxy-7-oxofuro[3,2-g]chromen-9-yl)oxy-3-methylbutan-2-yl] (E)-2-methylbut-2-enoate	0.021993	1.4981	0.5811	455.11	3.77		Phenylpropanoids and polyketides	Coumarins and derivatives	Furanocoumarins	C22H24O8	QUSMURJIBTWAOP-WUXMJOGZSA-N	COC1=C2C=COC2=C(OCC(OC(=O)C(C)=CC)C(C)(C)O)C3=C1C=CC(=O)O3	9521.03	35820.1	6462.51	7141.51	13285.7	14152.4
POS_22011	[M+Na]+	[3-Hydroxy-1-oxo-1-(2,3,4,5,6-pentahydroxyhexoxy)decan-5-yl] 3,5-dihydroxydecanoate	0.156988	0.451724	0.091911	577.321	8.288		Lipids and lipid-like molecules	Fatty Acyls	Fatty alcohols	C26H50O12	JPGYRFJJNVYGPI-UHFFFAOYSA-N	CCCCCC(O)CC(O)CC(=O)OC(CCCCC)CC(O)CC(=O)OCC(O)C(O)C(O)C(O)CO	3469.37	4444.78	2197.05	10708.2	6899.33	4776.02
POS_19486	[M+Na]+	[3-Methyl-1-[3-methyl-1-oxo-1-(2,3,4,5,6-pentahydroxyhexoxy)pentan-2-yl]oxy-1-oxobutan-2-yl] 2-hydroxy-3-methylpentanoate	0.219157	0.772785	0.558049	533.257	6.946		Organic acids and derivatives	Peptidomimetics	Depsipeptides	C23H42O12	NJYYDRBRLSOFNG-UHFFFAOYSA-N	CCC(C)C(O)C(=O)OC(C(C)C)C(=O)OC(C(C)CC)C(=O)OCC(O)C(O)C(O)C(O)CO	1835.87	27666.5	22094.6	23207.8	23479.8	20080
POS_27573	[M+Na]+	[3,4,5-Trihydroxy-6-(hydroxymethyl)oxan-2-yl] 4,6-dihydroxy-7,12,16-trimethyl-15-(4,5,6-trihydroxy-6-methylheptan-2-yl)pentacyclo[9.7.0.01,3.03,8.012,16]octadecane-7-carboxylate	0.365755	6.20539	0.37232	707.396	9.657		Lipids and lipid-like molecules	Prenol lipids	Terpene glycosides	C36H60O12	RCCBGOMNZWYBTJ-UHFFFAOYSA-N	CC(CC(O)C(O)C(C)(C)O)C1CCC2(C)C3CCC4C(C)(C(O)CC(O)C45CC35CCC12C)C(=O)OC6OC(CO)C(O)C(O)C6O	54684.8	4332.72	2455.61	3039.3	4857.64	2009.48
POS_16421	[M+NH4]+	[3,4,5-Trihydroxy-6-[(3,4,5-trihydroxyoxan-2-yl)oxymethyl]oxan-2-yl] 2,6,6-trimethylcyclohexene-1-carboxylate	0.0570574	0.806639	0.640039	480.242	3.943		Organic oxygen compounds	Organooxygen compounds	Carbohydrates and carbohydrate conjugates	C21H34O11	JGMROMZJBQKIDK-UHFFFAOYSA-N	CC1=C(C(=O)OC2OC(COC3OCC(O)C(O)C3O)C(O)C(O)C2O)C(C)(C)CCC1	487.646	2704.27	1574.34	1988.47	2650.57	1269.75
POS_9384	[M+H]+	[4,6-diethyl-6-(4-ethyl-2-methyloctyl)-3H-1,2-dioxin-3-yl]acetic acid	0.796549	1.92271	0.302177	355.282	11.086					C21H38O4	PGURXSLSPSOJSS-ZHOBMISMNA-N	O=C(O)CC1OOC(C=C1CC)(CC)CC(C)CC(CC)CCCC	306338	76445.2	132782	85409.1	77175	105560
POS_16096	[M+Na]+	[5-Ethenyl-3-hydroxy-4-(3-hydroxyprop-1-en-2-yl)-2-(3-methoxy-3-oxoprop-1-en-2-yl)-5-methylcyclohexyl] 4-acetyloxy-3-hydroxy-2-methylidenebutanoate	0.132271	0.979529	0.962666	475.175	4.235		Lipids and lipid-like molecules	Prenol lipids	Sesquiterpenoids	C23H32O9	XTMCUUVQSGQNSI-UHFFFAOYSA-N	COC(=O)C(=C)C1C(O)C(C(=C)CO)C(C)(CC1OC(=O)C(=C)C(O)COC(C)=O)C=C	9738.65	27393.9	13832.4	8355.5	24379.5	19295
POS_6374	[M+H]+	[6]-Gingerol	0.237615	0.656497	0.22261	295.185	6.738	C10462	Benzenoids	Phenols	Methoxyphenols	C17H26O4	NLDDIKRKFXEWBK-UHFFFAOYSA-N	CCCCCC(O)CC(=O)CCC1=CC(=C(O)C=C1)OC	6188.23	16485.6	23635.2	24821.2	18879.8	26838.7
POS_33738	[M+Na]+	{6-[2-(hexadecanoyloxy)-3-(icosa-5,8,11,14,17-pentaenoyloxy)propoxy]-3,4,5-trihydroxyoxan-2-yl}methanesulfonic acid	0.0158427	1.12189	0.519795	863.491	12.311					C45H76O12S	IIDPUWZBYVLQEU-GJCHBECBNA-N	O=C(OCC(OC(=O)CCCCCCCCCCCCCCC)COC1OC(CS(=O)(=O)O)C(O)C(O)C1O)CCCC=CCC=CCC=CCC=CCC=CCC	9675.75	12644.8	15722.2	9545.68	12257.1	12106.8
POS_9122	[M+Na]+	1-(4-Hydroxyphenyl)-3-[(2R,3R,4S,5S,6R)-3,4,5-trihydroxy-6-(hydroxymethyl)oxan-2-yl]oxypropan-1-one	0.139793	1.07424	0.944244	351.103	1.915		Lipids and lipid-like molecules	Fatty Acyls	Fatty acyl glycosides	C15H20O8	NPAQHLFPEOMKAL-UXXRCYHCSA-N	OCC1OC(OCCC(=O)C2=CC=C(O)C=C2)C(O)C(O)C1O	544.849	5947.26	13171	15829.7	1332.95	1141.58
POS_7424	[M+H]+	1-(Tert-butylamino)-3-{[4-(morpholin-4-yl)-1,2,5-thiadiazol-3-yl]oxy}propan-2-ol	0.376699	1.37102	0.593257	317.155	3.73	C07141	Organic nitrogen compounds	Organonitrogen compounds	Amines	C13H24N4O3S	BLJRIMJGRPQVNF-UHFFFAOYSA-N	CC(C)(C)NCC(O)COC1=NSN=C1N2CCOCC2	173181	68824.8	56864.1	118072	20798.6	79119.8
POS_16933	[M+Na]+	1-[(2E,4E)-6,7-Dihydroxy-2,4-octadienoyl]prolyl-N-methylvalyl-N2-methylalaninamide	0.0545643	1.1913	0.701314	489.263	5.151		Organic acids and derivatives	Carboxylic acids and derivatives	Amino acids, peptides, and analogues	C23H38N4O6	YHEIGYJZSXWHJB-MKICQXMISA-N	CC(C)C(N(C)C(=O)C1CCCN1C(=O)C=CC=CC(O)C(C)O)C(=O)N(C)C(C)C(O)=N	4921.06	14615.3	13216.7	3196.85	12457.9	11838.8
POS_9354	[M+Na]+	1-[2-Hydroxy-4-(3-hydroxy-5-methylphenoxy)-6-methylphenyl]-3-methylbutane-2,3-diol	0.935554	0.835249	0.365671	355.152	6.854		Benzenoids	Benzene and substituted derivatives	Diphenylethers	C19H24O5	FLLRZSQAKUHACV-UHFFFAOYSA-N	CC1=CC(=CC(=C1)O)OC2=CC(=C(CC(O)C(C)(C)O)C(=C2)C)O	650752	539755	369523	576249	552471	739022
POS_3718	[M+H]+	1-[3-(Trifluoromethyl)phenyl]piperazine	0.428531	1.34282	0.472852	231.11	6.437		Organoheterocyclic compounds	Diazinanes	Piperazines	C11H13F3N2	KKIMDKMETPPURN-UHFFFAOYSA-N	FC(F)(F)C1=CC=CC(=C1)N2CCNCC2	168816	517200	596066	381512	238794	334464
POS_1312	[M+H]+	1-Acetylproline	0.121665	0.874432	0.633914	158.08	1.258		Organic acids and derivatives	Carboxylic acids and derivatives	Amino acids, peptides, and analogues	C7H11NO3	GNMSLDIYJOSUSW-UHFFFAOYSA-N	CC(=O)N1CCCC1C(O)=O	13361.6	7505.46	7026.74	7876.8	10579.6	13442.9
POS_2639	[M+H]+	1-Decanamine, N,N-dimethyl-, N-oxide	0.105535	1.08521	0.491387	202.214	7.39		Organic nitrogen compounds	Organonitrogen compounds	Aminoxides	C12H27NO	ZRKZFNZPJKEWPC-UHFFFAOYSA-N	CCCCCCCCCC[N](C)(C)=O	66387.3	54771	51494.3	51527.8	47145.4	60422.4
POS_747	[M]+	1-Methylnicotinamide	0.295144	3.4949	0.4241	137.079	1.245	C02918	Organoheterocyclic compounds	Pyridines and derivatives	Pyridinecarboxylic acids and derivatives	[C7H9N2O]+	LDHMAVIPBRSVRG-UHFFFAOYSA-O	C[N+]1=CC(=CC=C1)C(O)=N	43170.3	7033.41	241.434	6702.44	7248.34	483.14
POS_26794	[M+Na]+	1-O-[(2alpha,3beta,5xi,6beta,9xi,18xi)-2,3,6,23-Tetrahydroxy-28-oxoolean-12-en-28-yl]-beta-D-glucopyranose	0.0671024	0.729698	0.529712	689.373	7.847		Lipids and lipid-like molecules	Prenol lipids	Terpene glycosides	C36H58O11	DZVIFFMYEULLBY-NSOPSRGASA-N	CC1(C)CCC2(CCC3(C)C(=CCC4C5(C)CC(O)C(O)C(C)(CO)C5C(O)CC34C)C2C1)C(=O)OC6OC(CO)C(O)C(O)C6O	2154.5	2888.2	1361.48	3068.37	1017.27	4690.84
POS_27408	[M+Na]+	1-O-[(2alpha,3beta,5xi,9xi,18xi)-2,3,19,24-Tetrahydroxy-24,28-dioxoolean-12-en-28-yl]-beta-D-glucopyranose	0.172944	1.28816	0.0677953	703.362	9.638		Lipids and lipid-like molecules	Prenol lipids	Triterpenoids	C36H56O12	NZNHJGNBLPBNLU-YIKANFTBSA-N	CC1(C)CCC2(CCC3(C)C(=CCC4C5(C)CC(O)C(O)C(C)(C5CCC34C)C(O)=O)C2C1O)C(=O)OC6OC(CO)C(O)C(O)C6O	71648.3	85616.4	70015.8	49771.2	61185.4	65481.8
POS_7009	[M-H2O+H]+	1-O-[(2E)-3-(2-Hydroxyphenyl)-1-oxo-2-propen-1-yl]-beta-D-glucopyranose	0.0736551	0.682549	0.174794	309.096	4.684		Phenylpropanoids and polyketides	Cinnamic acids and derivatives	Hydroxycinnamic acids and derivatives	C15H18O8	KDNJTHIKZATBIB-HKIVJWRYSA-N	OC[C@H]1O[C@@H](OC(=O)\\C=C\\C2=C(O)C=CC=C2)[C@H](O)[C@@H](O)[C@@H]1O	1746.96	2321.68	1373.45	2876.57	3271.27	1825.36
POS_19561	[M+NH4]+	1-O-linoleoyl-3-O-beta-D-galactopyranosyl-syn-glycerol	0.532445	0.54331	0.22953	534.362	10.679					C27H48O9	LBHUIJRTHBBWHP-HJFVYBCQSA-N	O=C(OCC(O)COC1OC(CO)C(O)C(O)C1O)CCCCCCCC=CCC=CCCCCC	3310.05	59540.5	40274.3	45270.1	58542	85996.2
POS_23573	[M+NH4]+	1-Palmitoyl-2-oleoyl-rac-glycerol	0.792331	0.704717	0.35958	612.555	11.225		Lipids and lipid-like molecules	Glycerolipids	Diradylglycerols	C37H70O5	YEJYLHKQOBOSCP-UHFFFAOYSA-N	CCCCCCCCCCCCCCCC(=O)OCC(CO)OC(=O)CCCCCCCC=CCCCCCCCC	87528.1	197259	163170	134414	192915	308327
POS_4775	[M+H]+	1-Tetradecanamine, N,N-dimethyl-, N-oxide	0.0952588	1.08458	0.684096	258.278	8.748		Organic nitrogen compounds	Organonitrogen compounds	Aminoxides	C16H35NO	ONHFWHCMZAJCFB-UHFFFAOYSA-N	CCCCCCCCCCCCCC[N+](C)(C)[O-]	32833.5	23884	18459.9	22395.2	20872.3	26047.2
POS_24696	[M+NH4]+	1,2-Dioleoyl-sn-glycerol	1.9903	0.41536	0.204884	638.565	11.746	C00165	Lipids and lipid-like molecules	Glycerolipids	Diradylglycerols	C39H72O5	AFSHUZFNMVJNKX-LLWMBOQKSA-N	CCCCCCCC\\C=C/CCCCCCCC(=O)OC[C@H](CO)OC(=O)CCCCCCC\\C=C/CCCCCCCC	3015.04	494685	383181	249389	914093	957283
POS_3047	[M+H]+	1,3-Diphenylguanidine	0.201739	0.793387	0.531354	212.125	4.439		Benzenoids	Benzene and substituted derivatives		C13H13N3	OWRCNXZUPFZXOS-UHFFFAOYSA-N	N=C(NC1=CC=CC=C1)NC2=CC=CC=C2	21859.4	14455.5	8705.46	11298.6	19429.5	26016.5
POS_7352	[M+H]+	1,4a-Dimethyl-9-oxo-7-propan-2-yl-3,4,10,10a-tetrahydro-2H-phenanthrene-1-carboxylic acid	0.374074	0.68676	0.482762	315.19	9.307		Lipids and lipid-like molecules	Prenol lipids	Diterpenoids	C20H26O3	MSWJSDLNPCSSNW-UHFFFAOYSA-N	CC(C)C1=CC=C2C(=C1)C(=O)CC3C(C)(CCCC23C)C(O)=O	50579.7	20477.1	20892.8	14465.4	58553.8	60869.8
POS_11431	[M+Na]+	1,7-Bis(3,4-dihydroxyphenyl)heptan-3-yl acetate	1.04507	0.135286	0.405906	397.157	5.766		Phenylpropanoids and polyketides	Diarylheptanoids	Linear diarylheptanoids	C21H26O6	UWNADLMLMRTPFL-UHFFFAOYSA-N	CC(=O)OC(CCCCC1=CC=C(O)C(=C1)O)CCC2=CC=C(O)C(=C2)O	50174.3	13851.8	7685.29	9824.58	15381.8	504867
POS_8031	[M+H]+	1,7-Bis(4-hydroxyphenyl)-5-methoxy-3-heptanone	1.40549	0.0903791	0.261784	329.175	7.997		Phenylpropanoids and polyketides	Diarylheptanoids	Linear diarylheptanoids	C20H24O4	PASZRDILCDRSOZ-UHFFFAOYSA-N	COC(CCC1=CC=C(O)C=C1)CC(=O)CCC2=CC=C(O)C=C2	4283.79	53870	24757.2	134313	54575.4	728481
POS_5534	[M+H]+	1,8-dimethyl-6-oxo-7-(propan-2-ylidene)-2,3,4,8-tetrahydro-1H-naphthalen-2-ylacetate	2.18059	10.5122	0.382579	277.18	8.979					C17H24O3	RIMSRWLZAHVEPH-FHXDREJJNA-N	O=C1C=C2CCC(OC(=O)C)C(C)C2(C)CC1=C(C)C	1.93403e+06	75976.6	28952.4	73615.8	32289.8	88054.8
POS_4891	[M+H]+	1,9-Heptadecadiene-4,6-diyne-3,8-diol	0.397692	1.23625	0.322926	261.182	7.975		Lipids and lipid-like molecules	Fatty Acyls	Fatty alcohols	C17H24O2	QWCNQXNAFCBLLV-RCQSYPNMSA-N	CCCCCCCC=CC(O)C#CC#CC(O)C=C	670506	691328	620442	457461	394365	751634
POS_10461	[M+H]+	10'-Apo-beta-caroten-10'-al	0.0662932	1.13748	0.555158	377.288	12.313					C27H36O	PJEHRCCPERVGEC-AMANCMKTSA-N	O=CC=CC(=CC=CC=C(C=CC=C(C=CC1=C(C)CCCC1(C)C)C)C)C	27512.8	24430.5	31309.2	20127.2	34018.3	19044.8
POS_26701	[M+Na]+	11-Hydroxy-9-(hydroxymethyl)-2-methoxycarbonyl-2,6a,6b,9,12a-pentamethyl-10-(3,4,5-trihydroxyoxan-2-yl)oxy-1,3,4,5,6,6a,7,8,8a,10,11,12,13,14b-tetradecahydropicene-4a-carboxylic acid	0.453605	1.06922	0.677483	687.383	9.575		Lipids and lipid-like molecules	Prenol lipids	Triterpenoids	C36H56O11	SFZVDNKTWPZIJG-UHFFFAOYSA-N	COC(=O)C1(C)CCC2(CCC3(C)C(=CCC4C5(C)CC(O)C(OC6OCC(O)C(O)C6O)C(C)(CO)C5CCC34C)C2C1)C(O)=O	514234	468773	340938	350578	408597	479056
POS_7311	[M+Na]+	11,12-Dimethoxydihydrokawain	2.83193	0.717464	0.238204	315.123	5.32		Phenylpropanoids and polyketides	Kavalactones		C16H20O5	HEURTYMJWQPWNN-UHFFFAOYSA-N	COC1=CC(=O)OC(CCC2=CC=C(OC)C(=C2)OC)C1	2.15072e+06	2.39781e+06	1.35864e+06	1.90206e+06	2.82954e+06	3.5018e+06
POS_11554	[M+H]+	11,12-Methylenedioxykopsinaline	0.469703	0.868679	0.748507	399.187	7.665		Alkaloids and derivatives	Aspidofractine alkaloids		C22H26N2O5	JVIKUDVTJCANPX-NBYDKTAJSA-N	COC(=O)[C@]1(O)C[C@]23CCCN4CC[C@]5([C@H]24)C6=C(N[C@]15CC3)C7=C(OCO7)C=C6	325218	133974	110606	181045	159754	315137
POS_3593	[M+H]+	12-Hydroxyjasmonic acid	0.187686	0.824825	0.427353	227.126	4.414		Lipids and lipid-like molecules	Fatty Acyls	Lineolic acids and derivatives	C12H18O4	RZGFUGXQKMEMOO-BSANDHCLSA-N	OCC\\C=C/C[C@@H]1[C@H](CCC1=O)CC(O)=O	37436.8	20020.7	19501	27459.5	33344.4	32499
POS_8465	[M+H-H2O]+	12,19,20-Trihydroxy-14-methylenegeranylnerol	0.648407	1.52267	0.173677	337.269	12.81					C21H38O4	GNDMMQFAFXCKOZ-HQNHMHSFNA-N	OCC=C(CO)CCCC(CO)CCC=C(C)C(O)CC(=C)C(C)C	327547	195248	418243	215521	210484	192013
POS_13299	[M+H-H2O]+	13'-Hydroxy-alpha-tocopherol	1.40083	0.688247	0.390997	429.37	13.035					C29H50O3	URYLCCKXLNXSRS-XIRVVSDESA-N	OC=1C(=C(C=2OC(C)(CCC2C1C)CCCC(C)CCCC(C)CCCC(C)CO)C)C	49700.4	751264	630319	576072	779726	723810
POS_5584	[M+H]+	15,16-Dihydrotanshinone I	1.061	0.981597	0.331632	279.102	8.493		Lipids and lipid-like molecules	Prenol lipids	Diterpenoids	C18H14O3	HARGZZNYNSYSGJ-UHFFFAOYSA-N	CC1COC2=C1C(=O)C(=O)C3=C2C=CC4=C3C=CC=C4C	4.16034e+06	4.08019e+06	4.00493e+06	4.1664e+06	4.2456e+06	4.06304e+06
POS_19307	[M+H]+	16-hydroxy-2,2,4a,6a,6b,11,11,14b-octamethyl-4H,4bH,5H,6H,7H,8H,9H,10H,12H,12aH,14H,14aH,15H,16H,16aH-piceno[3,4-d][1,3]dioxine-8a-carboxylic acid	2.25756	29.4847	0.379304	529.385	11.567					C33H52O5	VWEPILNMGZRUTF-DKPBLTRPNA-N	O=C(O)C12CCC(C)(C)CC2C3=CCC4C5(C)CC(O)C6OC(OCC6(C)C5CCC4(C)C3(C)CC1)(C)C	1.9811e+06	18971.7	10396.7	8452.6	50831.2	8903.08
POS_13810	[M-3H2O+H]+	16-Hydroxy-4,4,8,10,14-pentamethyl-17-(4,5,6-trihydroxy-6-methylheptan-2-yl)-1,2,5,6,7,9,11,12,15,16-decahydrocyclopenta[a]phenanthren-3-one	1.68029	0.436737	0.229745	437.334	11.376		Lipids and lipid-like molecules	Prenol lipids	Triterpenoids	C30H50O5	PUCLKHYBLVYMRK-UHFFFAOYSA-N	CC(CC(O)C(O)C(C)(C)O)C1=C2CCC3C4(C)CCC(=O)C(C)(C)C4CCC3(C)C2(C)CC1O	229523	304508	156395	165717	538814	876345
POS_13053	[M+H]+	17(21)-Hopen-6-one	0.937562	0.711203	0.148372	425.374	10.323		Lipids and lipid-like molecules	Prenol lipids	Hopanoids	C30H48O	OZFAGHUNGAZEMO-VKNUIDEPSA-N	CC(C)C1=C2CC[C@]3(C)[C@H](CC[C@@H]4[C@@]5(C)CCCC(C)(C)C5C(=O)C[C@@]34C)[C@@]2(C)CC1	136683	287032	222452	298978	266290	343287
POS_328	[M+H]+	1H-Indazole	0.291081	1.43189	0.738399	119.062	2.648		Organoheterocyclic compounds	Benzopyrazoles	Indazoles	C7H6N2	BAXOFTOLAUCFNW-UHFFFAOYSA-N	[NH]1N=CC2=CC=CC=C12	361.131	34036.1	31230.5	45158.9	365.996	307.983
POS_4765	[M]+	2-(((R)-2,3-Dihydroxypropyl)phosphoryloxy)-N,N,N-trimethylethanaminium	0.458912	0.460965	0.245405	258.11	1.055		Lipids and lipid-like molecules	Glycerophospholipids	Glycerophosphocholines	[C8H21NO6P]+	SUHOQUVVVLNYQR-MRVPVSSYSA-O	C[N+](C)(C)CCO[P](O)(=O)OCC(O)CO	20522.2	34187.8	18026.2	41265.8	24623.7	91901.6
POS_2172	[M+H]+	2-(1-Phenylethyl)-3,6-Dihydro-2H-Pyran	0.70966	0.707117	0.457468	189.126	4.061					C13H16O	YZZCODTUVAVDER-AAEUAGOBSA-N	O1CC=CCC1C(C=2C=CC=CC2)C	12896.8	218768	124082	179445	162172	161477
POS_1487	[M+H]+	2-(2-Butoxyethoxy)ethanol	0.193104	0.86139	0.609554	163.134	2.864		Organic oxygen compounds	Organooxygen compounds	Ethers	C8H18O3	OAYXUHPQHDHDDZ-UHFFFAOYSA-N	CCCCOCCOCCO	25168.3	33367.5	22989.8	44889.2	29774.6	19980.4
POS_5099	[M+H]+	2-(6-Aminopurin-9-yl)-5-(hydroxymethyl)oxolane-3,4-diol	0.476159	1.09464	0.751453	268.105	2.331		Nucleosides, nucleotides, and analogues	Purine nucleosides		C10H13N5O4	OIRDTQYFTABQOQ-UHFFFAOYSA-N	NC1=C2N=C[N](C3OC(CO)C(O)C3O)C2=NC=N1	1.61173e+06	1.18269e+06	666998	1.11334e+06	842979	1.20585e+06
POS_3714	[M+H]+	2-(6-Methoxy-2-naphthyl)propionic acid	0.399681	0.823111	0.255727	231.099	8.582		Benzenoids	Naphthalenes		C14H14O3	CMWTZPSULFXXJA-UHFFFAOYSA-N	COC1=CC2=C(C=C1)C=C(C=C2)C(C)C(O)=O	77522.2	70896.3	56953.9	64595.8	93331.7	91580
POS_3606	[M+H]+	2-(7-Hydroxy-6-methyloctyl)-2H-furan-5-one	0.337779	3.70213	0.40155	227.164	4.519		Lipids and lipid-like molecules	Fatty Acyls	Fatty alcohols	C13H22O3	AEPMKZIOUKHDOO-UHFFFAOYSA-N	CC(O)C(C)CCCCCC1OC(=O)C=C1	51488.5	3689.98	5389.84	4110.88	4050.36	8199.16
POS_5189	[M+NH4]+	2-(8-Hydroxy-4a,8-dimethyldecahydro-2-naphthalenyl)acrylic acid	0.611439	0.647676	0.208172	270.204	6.373		Lipids and lipid-like molecules	Prenol lipids	Sesquiterpenoids	C15H24O3	FXKCXGBBUBCRPU-UHFFFAOYSA-N	CC1(O)CCCC2(C)CCC(CC12)C(=C)C(O)=O	111970	115634	68449.1	112058	216549	128494
POS_9370	[M+Na]+	2-(Hydroxymethyl)-6-(6-hydroxy-6-methyl-3-propan-2-ylcyclohex-3-en-1-yl)oxyoxane-3,4,5-triol	0.606363	0.700828	0.253754	355.172	6.226		Lipids and lipid-like molecules	Prenol lipids	Terpene glycosides	C16H28O7	DIPALNDKWHCLEA-UHFFFAOYSA-N	CC(C)C1=CCC(C)(O)C(C1)OC2OC(CO)C(O)C(O)C2O	40737.4	132991	79801.6	117591	129179	114987
POS_20209	[M+Na]+	2-(Hydroxymethyl)-6-[5-[3-(hydroxymethyl)-5-(3-hydroxypropyl)-7-methoxy-2,3-dihydro-1-benzofuran-2-yl]-2-methoxyphenoxy]oxane-3,4,5-triol	0.0105772	1.10766	0.761896	545.194	3.499		Phenylpropanoids and polyketides	2-arylbenzofuran flavonoids		C26H34O11	RWEVZSYWIIZZFV-UHFFFAOYSA-N	COC1=CC=C(C=C1OC2OC(CO)C(O)C(O)C2O)C3OC4=C(OC)C=C(CCCO)C=C4C3CO	1216.93	1876.94	667.788	906.201	1381.41	1108.44
POS_21717	[M+H]+	2-[(2R,3R,4S,5R,6R)-3,4,5-Trihydroxy-6-[(1R,2R)-2-methoxy-1-[[(2S,4R)-1-methyl-4-propylpyrrolidine-2-carbonyl]amino]propyl]oxan-2-yl]sulfanylethyl 2-hydroxybenzoate	0.857326	1.34063	0.410959	571.272	5.929		Organic acids and derivatives	Carboxylic acids and derivatives	Amino acids, peptides, and analogues	C27H42N2O9S	AHYXCADWVNCRQE-QNEQGIPDSA-N	CCC[C@@H]1C[C@H](N(C)C1)C(=O)N[C@H]([C@@H](C)OC)[C@H]2O[C@H](SCCOC(=O)C3=C(O)C=CC=C3)[C@H](O)[C@@H](O)[C@H]2O	581486	1.29745e+06	1.56713e+06	1.08636e+06	811491	672617
POS_19484	[M+Na]+	2-[(2R,4As,8S,8aS)-8-[2-[(4aS,7R,8aR)-7-(1-carboxyethenyl)-1-hydroxy-4a-methyl-2-oxo-6,7,8,8a-tetrahydro-5H-naphthalen-1-yl]ethyl]-4a-methyl-7-oxo-1,2,3,4,8,8a-hexahydronaphthalen-2-yl]prop-2-enoic acid	0.0419078	0.936152	0.839698	533.254	6.798		Lipids and lipid-like molecules	Prenol lipids	Sesquiterpenoids	C30H38O7	BSSWIRVAMSGQMG-RTTXQYISSA-N	CC12CCC(CC1C(CCC3(O)C4CC(CCC4(C)C=CC3=O)C(=C)C(O)=O)C(=O)C=C2)C(=C)C(O)=O	2651.69	3151.08	1485.23	3700.65	1694.74	2389.67
POS_12214	[M+Na]+	2-[(2Z)-5-(Hexopyranosyloxy)-2-penten-1-yl]-3-oxo-, (1R,2R)-cyclopentaneacetic acid	0.229608	0.906935	0.825471	411.16	4.412		Lipids and lipid-like molecules	Fatty Acyls	Fatty acyl glycosides	C18H28O9	JFDNMLUPLXZXGV-YAYCWVCRSA-N	OCC1OC(OCC\\C=C/C[C@@H]2[C@H](CCC2=O)CC(O)=O)C(O)C(O)C1O	69787	29787.5	29176.9	28347.3	72253.2	41362.9
POS_6000	[M+NH4]+	2-[(4aS,7R,8R)-7,8-Dihydroxy-4a,8-dimethyldecahydro-2-naphthalenyl]acrylic acid	0.485355	0.626941	0.131816	286.202	6.985		Lipids and lipid-like molecules	Prenol lipids	Sesquiterpenoids	C15H24O4	SVUDFAVZLCGQAU-UHFFFAOYSA-N	CC1(O)C(O)CCC2(C)CCC(CC12)C(=C)C(O)=O	49498.6	68207.7	50380.8	122324	75716.6	70066
POS_15498	[M+NH4]+	2-[[3,4-Dihydroxy-4-(hydroxymethyl)oxolan-2-yl]oxymethyl]-6-[(6,6-dimethyl-4-bicyclo[3.1.1]hept-3-enyl)methoxy]oxane-3,4,5-triol	0.180747	0.439775	0.0516422	464.245	6.233		Lipids and lipid-like molecules	Prenol lipids	Terpene glycosides	C21H34O10	KNHGVVIGMKZOJB-UHFFFAOYSA-N	CC1(C)C2CC=C(COC3OC(COC4OCC(O)(CO)C4O)C(O)C(O)C3O)C1C2	8330.11	3742.99	3326.82	13238	13624.8	8154.88
POS_22998	[M+NH4]+	2-[[5-(4-Hydroxy-3,5-dimethoxyphenyl)-6,7-bis(hydroxymethyl)-1,3-dimethoxy-5,6,7,8-tetrahydronaphthalen-2-yl]oxy]-6-(hydroxymethyl)oxane-3,4,5-triol	0.206347	2.85092	0.27907	600.264	3.973		Lignans, neolignans and related compounds	Lignan glycosides		C28H38O13	MLMDACHSXKCQIF-UHFFFAOYSA-N	COC1=CC(=CC(=C1O)OC)C2C(CO)C(CO)CC3=C(OC)C(=C(OC)C=C23)OC4OC(CO)C(O)C(O)C4O	24885.7	27979.7	1567.88	2056.73	15118.3	1918.12
POS_10721	[M+H]+	2-[1-(1H-Benzimidazol-2-yl)-3-(2-methoxyphenyl)propan-2-yl]-1H-benzimidazole	0.889618	1.07483	0.73766	383.184	9.35		Organoheterocyclic compounds	Benzimidazoles		C24H22N4O	FQFJIJMMCVBRBL-UHFFFAOYSA-N	COC1=CC=CC=C1CC(CC2=NC3=CC=CC=C3[NH]2)C4=NC5=CC=CC=C5[NH]4	4.52032e+06	5.97768e+06	6.61468e+06	6.30173e+06	3.47802e+06	6.1416e+06
POS_11183	[M+NH4]+	2-[2-[(Z)-pent-2-enyl]-3-[3,4,5-trihydroxy-6-(hydroxymethyl)oxan-2-yl]oxycyclopentyl]acetic acid	0.281623	0.789904	0.397773	392.224	5.302		Lipids and lipid-like molecules	Fatty Acyls	Fatty acyl glycosides	C18H30O8	GJZJZRWFRZFTEE-ARJAWSKDSA-N	CCC=CCC1C(CCC1OC2OC(CO)C(O)C(O)C2O)CC(O)=O	69706.7	51865.1	27318.8	61570.3	52051.3	74870.4
POS_12767	[M+Na]+	2-[5-[2-[2-[5-(2-Oxopropyl)oxolan-2-yl]propanoyloxy]butyl]oxolan-2-yl]propanoic acid	0.0595286	0.929565	0.6639	421.216	6.527		Organic acids and derivatives	Carboxylic acids and derivatives	Dicarboxylic acids and derivatives	C21H34O7	XFNIQDLOQLIJTQ-UHFFFAOYSA-N	CCC(CC1CCC(O1)C(C)C(O)=O)OC(=O)C(C)C2CCC(CC(C)=O)O2	39780.7	24265.3	39078	39040.2	39528.9	32368.9
POS_13324	[M+Na]+	2-{[6-O-(6-Deoxy-alpha-L-mannopyranosyl)-beta-D-glucopyranosyl]oxy}-3-methylbutanenitrile	0.0932155	0.813092	0.448693	430.171	2.683		Organic oxygen compounds	Organooxygen compounds	Carbohydrates and carbohydrate conjugates	C17H29NO10	QCHGZRADLYPSQB-SCRPALTRSA-N	CC(C)C(O[C@@H]1O[C@H](CO[C@@H]2O[C@@H](C)[C@H](O)[C@@H](O)[C@H]2O)[C@@H](O)[C@H](O)[C@H]1O)C#N	8605.54	8275.41	4922.03	7906.1	12089.3	6819.5
POS_12357	[M+Na]+	2-Acetoxy-4-pentadecylbenzoic acid	0.814048	0.467686	0.0528238	413.264	11.814		Benzenoids	Benzene and substituted derivatives	Benzoic acids and derivatives	C24H38O4	FMPIFABORGZGFA-UHFFFAOYSA-N	CCCCCCCCCCCCCCCC1=CC=C(C(O)=O)C(=C1)OC(C)=O	80892.3	71777.6	83639.4	123478	232110	149685
POS_672	[M+H]+	2-Aminobenzimidazole	0.600826	1.88219	0.547358	134.07	3.055		Organoheterocyclic compounds	Benzimidazoles		C7H7N3	JWYUFVNJZUSCSM-UHFFFAOYSA-N	N=C1NC2=C(N1)C=CC=C2	2694.95	145797	185148	172777	2838.66	1645.18
POS_669	[M+H]+	2-Aminobutanedioate;hydron	0.0863911	3.97371	0.263878	134.045	1.04		Organic acids and derivatives	Carboxylic acids and derivatives	Amino acids, peptides, and analogues	C4H7NO4	CKLJMWTZIZZHCS-UHFFFAOYSA-N	NC(CC(O)=O)C(O)=O	24.6768	3256.88	5958	1676.57	448.887	199.715
POS_7391	[M+H]+	2-Aminooctadec-8-ene-1,3,4-triol	0.496142	1.21448	0.559287	316.283	9.911		Organic nitrogen compounds	Organonitrogen compounds	Amines	C18H37NO3	CQKNELOTFUSOTP-UHFFFAOYSA-N	CCCCCCCCCC=CCCCC(O)C(O)C(N)CO	539958	365506	239783	404800	199560	338637
POS_7495	[M+H]+	2-Aminooctadecane-1,3,4-triol	1.36951	0.933272	0.353216	318.3	8.596		Organic nitrogen compounds	Organonitrogen compounds	Amines	C18H39NO3	AERBNCYCJBRYDG-UHFFFAOYSA-N	CCCCCCCCCCCCCCC(O)C(O)C(N)CO	2.75983e+06	2.55314e+06	2.45295e+06	2.72389e+06	2.53986e+06	3.05744e+06
POS_3502	[M+NH4]+	2-Hydroxy-2-(2-methoxy-2-oxoethyl)butanedioic acid	0.753542	0.388908	0.137427	224.075	1.242		Organic acids and derivatives	Carboxylic acids and derivatives	Tricarboxylic acids and derivatives	C7H10O7	YUTUUOJFXIMELV-UHFFFAOYSA-N	COC(=O)CC(O)(CC(O)=O)C(O)=O	50082.9	52847.7	42148.7	58672.7	199332	115038
POS_330	[M+H]+	2-Hydroxy-3-methylbutyric acid	0.0420629	0.738148	0.416442	119.068	2.395		Lipids and lipid-like molecules	Fatty Acyls	Fatty acids and conjugates	C5H10O3	NGEWQZIDQIYUNV-UHFFFAOYSA-N	CC(C)C(O)C(O)=O	170.237	776.778	562.667	633.583	563.506	848.138
POS_1518	[M+H]+	2-Hydroxycinnamic acid	0.489343	0.88567	0.4331	165.054	7.82	C01772	Phenylpropanoids and polyketides	Cinnamic acids and derivatives	Hydroxycinnamic acids and derivatives	C9H8O3	PMOWTIHVNWZYFI-AATRIKPKSA-N	OC(=O)C=CC1=C(O)C=CC=C1	182026	151796	138806	139221	202147	192272
POS_1529	[M+H]+	2-Hydroxymethyl-tetrahydro-pyran-3,4,5-triol	0.0536253	1.08937	0.28021	165.069	8.492		Organic oxygen compounds	Organooxygen compounds	Carbohydrates and carbohydrate conjugates	C6H12O5	MPCAJMNYNOGXPB-UHFFFAOYSA-N	OCC1OCC(O)C(O)C1O	84558.6	77049.5	92820.2	79319.5	82545.1	71689.7
POS_1220	[M+H]+	2-Isopropyl-6-methyl-4-pyrimidone	0.083195	0.733586	0.572339	153.102	3.699		Organoheterocyclic compounds	Diazines	Pyrimidines and pyrimidine derivatives	C8H12N2O	AJPIUNPJBFBUKK-UHFFFAOYSA-N	CC(C)C1=NC(=O)C=C(C)N1	2119.65	4337.34	2036	3820.08	1289.56	6467.7
POS_1125	[M+H]+	2-Mercaptobenzimidazole	0.223646	0.469208	0.0429764	151.032	4.644		Organoheterocyclic compounds	Benzimidazoles		C7H6N2S	YHMYGUUIMTVXNW-UHFFFAOYSA-N	SC1=NC2=CC=CC=C2[NH]1	5820.99	3164.36	8416.86	9058.67	14049.6	13980.2
POS_21900	[M+Na]+	2-Methoxy-4-[tetrahydro-3a,6a-dihydroxy-4-(4-hydroxy-3-methoxyphenyl)-1H,3H-furo[3,4-c]furan-1-yl]phenyl-beta-D-glucopyranoside	0.226635	0.790763	0.645716	575.175	3.778		Lignans, neolignans and related compounds	Lignan glycosides		C26H32O13	IBQVOWQTGYYRJP-CPNFYLCOSA-N	COC1=C(O)C=CC(=C1)C2OCC3(O)C(OCC23O)C4=CC(=C(O[C@@H]5O[C@H](CO)[C@@H](O)[C@H](O)[C@H]5O)C=C4)OC	47917.3	18302.9	8305.69	20608.6	33034.6	40602.2
POS_9765	[M+H]+	2-Methoxy-4-pentadecylbenzoic acid	0.156058	0.649389	0.469933	363.288	11.715		Benzenoids	Benzene and substituted derivatives	Benzoic acids and derivatives	C23H38O3	HDGBHYXZLPCUJI-UHFFFAOYSA-N	CCCCCCCCCCCCCCCC1=CC=C(C(O)=O)C(=C1)OC	3217.9	10223.7	2984.39	3749.23	13579.2	7966.11
POS_6139	[M+H]+	2-Methyl-3-[(2S,3R,4S,5S,6R)-3,4,5-trihydroxy-6-(hydroxymethyl)oxan-2-yl]oxypyran-4-one	0.123278	0.873963	0.718721	289.091	2.286		Organic oxygen compounds	Organooxygen compounds	Carbohydrates and carbohydrate conjugates	C12H16O8	YGSIRXHFAUFUEJ-GPTQDWHKSA-N	CC1=C(OC2OC(CO)C(O)C(O)C2O)C(=O)C=CO1	6156.26	15248.9	8529.02	13306.4	6393.63	14551.1
POS_6411	[M+NH4]+	2-Methylidene-4-[(2R,3R,4S,5S,6R)-3,4,5-trihydroxy-6-(hydroxymethyl)oxan-2-yl]oxybutanoic acid	0.119059	0.587142	0.1785	296.133	1.242		Lipids and lipid-like molecules	Saccharolipids		C11H18O8	QJALTHDWQWOLLT-ZBGLXGBJSA-N	OCC1OC(OCCC(=C)C(O)=O)C(O)C(O)C1O	386.495	3355.72	3322.54	4477.09	3610.62	3944.73
POS_6808	[M+H]+	2-Monomyristin	0.508311	0.984922	0.90036	303.255	10.755		Lipids and lipid-like molecules	Glycerolipids	Monoradylglycerols	C17H34O4	TVIMZSOUQXNWHO-UHFFFAOYSA-N	CCCCCCCCCCCCCC(=O)OC(CO)CO	516084	454071	378188	421517	425687	521780
POS_8169	[M+H]+	2-Palmitoylglycerol	6.93509	16.0552	0.376122	331.284	11.279		Lipids and lipid-like molecules	Glycerolipids	Monoradylglycerols	C19H38O4	BBNYCLAREVXOSG-UHFFFAOYSA-N	CCCCCCCCCCCCCCCC(=O)OC(CO)CO	1.88347e+07	362770	387220	371325	362432	486077
POS_3345	[M+H]+	2-Phenyl-2-piperidin-1-ium-2-ylacetate	0.115151	1.16492	0.111046	220.133	7.375		Organic nitrogen compounds	Organonitrogen compounds	Amines	C13H17NO2	INGSNVSERUZOAK-UHFFFAOYSA-N	OC(=O)C(C1CCCCN1)C2=CC=CC=C2	33949.3	28955.1	28593.1	24954.4	28628.2	24961.1
POS_14652	[M+Na]+	2-Phenylethyl 3-O-(4-carboxy-3-hydroxy-3-methylbutanoyl)-beta-D-glucopyranoside	0.0738302	1.04513	0.917696	451.156	4.152		Lipids and lipid-like molecules	Saccharolipids		C20H28O10	WGMNBGJQXOIVGA-HJVQXQJGSA-N	CC(O)(CC(O)=O)CC(=O)OC1C(O)C(CO)OC(OCCC2=CC=CC=C2)C1O	2344.01	13220.4	8752.88	7160.22	8513.3	7593.72
POS_13585	[M+NH4]+	2-Phenylethyl 6-O-[(2S,3R,4R)-3,4-dihydroxy-4-(hydroxymethyl)tetrahydro-2-furanyl]-beta-D-glucopyranoside	0.149084	1.14127	0.497269	434.201	4.442		Organic oxygen compounds	Organooxygen compounds	Carbohydrates and carbohydrate conjugates	C19H28O10	GZSQKOFXMZDKPV-DERWZFJFSA-N	OCC1(O)COC(OCC2OC(OCCC3=CC=CC=C3)C(O)C(O)C2O)C1O	92303.6	90748.6	53562.9	62500.6	73052.8	71773.4
POS_79	[M+H]+	2-Pyrrolidinone	0.574629	0.548617	0.46073	86.0596	1.074	C11118	Organoheterocyclic compounds	Pyrrolidines	Pyrrolidones	C4H7NO	HNJBEVLQSNELDL-UHFFFAOYSA-N	O=C1CCCN1	785.318	89887.3	25662.3	14451.5	88292.5	109307
POS_115	[M+H]+	2,3-Butanediol	0.0140967	1.03101	0.95819	91.0743	2.319	C00265	Organic oxygen compounds	Organooxygen compounds	Alcohols and polyols	C4H10O2	OWBTYPJTUOEWEK-UHFFFAOYSA-N	CC(O)C(C)O	43.7384	409.69	180.544	151.422	180.589	282.891
POS_10519	[M+Na]+	2,3-Dihydro-2-(1-hydroxy-1-methylethyl)-4-methoxy-6-(2-phenylethyl)-7-benzofurancarboxylic acid	0.983162	1.02923	0.9545	379.15	7.326		Phenylpropanoids and polyketides	Stilbenes		C21H24O5	XJKIBJFVLHQLKC-UHFFFAOYSA-N	COC1=C2CC(OC2=C(C(O)=O)C(=C1)CCC3=CC=CC=C3)C(C)(C)O	1.65428e+06	709741	321770	635366	863499	1.11065e+06
POS_5958	[M-H2O+H]+	2,3-Dihydroxypropyl tetradecanoate	0.372269	0.987977	0.916543	285.242	10.754		Lipids and lipid-like molecules	Glycerolipids	Monoradylglycerols	C17H34O4	DCBSHORRWZKAKO-UHFFFAOYSA-N	CCCCCCCCCCCCCC(=O)OCC(O)CO	268729	259190	216026	229758	228941	294299
POS_12492	[M+H]+	2,3-dimethyl-5-(3,7,11,15-tetramethylhexadec-2-en-1-yl)cyclohexa-2,5-diene-1,4-dione	0.833717	0.857459	0.551768	415.354	12.325					C28H46O2	ZPVFWTSVFVOTQH-HRDITHNBNA-N	O=C1C=C(C(=O)C(=C1C)C)CC=C(C)CCCC(C)CCCC(C)CCCC(C)C	350435	478159	313365	362745	357602	611447
POS_9261	[M-2H2O+H]+	2,4-Dihydroxy-3-[(E)-4-hydroxy-3-methyl-5-(1,2,6-trimethyl-3-oxocyclohexyl)pent-2-enyl]-6-methylbenzaldehyde	0.414114	1.53514	0.316381	353.209	11.868		Organic oxygen compounds	Organooxygen compounds	Carbonyl compounds	C23H32O5	BQAWIDAQBDWCGH-AWNIVKPZSA-N	CC1CCC(=O)C(C)C1(C)CC(O)\\C(C)=C\\CC2=C(O)C(=C(C)C=C2O)C=O	177013	503467	381613	255164	133261	303429
POS_7247	[M-H2O+H]+	2,4-Dihydroxyheptadecyl acetate	0.913215	1.79054	0.24961	313.27	13.666		Lipids and lipid-like molecules	Fatty Acyls	Fatty alcohols	C19H38O4	ZBVKFVTUHVIICH-UHFFFAOYSA-N	CCCCCCCCCCCCCC(O)CC(O)COC(C)=O	390912	125259	207491	145736	143443	114980
POS_2443	[M+H]+	2,4,5-Trimethoxybenzaldehyde	0.126621	0.930825	0.754561	197.078	3.284		Benzenoids	Benzene and substituted derivatives	Benzoyl derivatives	C10H12O4	IAJBQAYHSQIQRE-UHFFFAOYSA-N	COC1=C(OC)C=C(C=O)C(=C1)OC	24438.8	19556.7	11232.6	17195.9	20366	21770.5
POS_3069	[M+H]+	2,4,5-Trimethoxybenzoic acid	0.23184	0.85135	0.412999	213.075	4.535		Benzenoids	Benzene and substituted derivatives	Benzoic acids and derivatives	C10H12O5	KVZUCOGWKYOPID-UHFFFAOYSA-N	COC1=C(OC)C=C(C(O)=O)C(=C1)OC	29043.8	34491.9	18975.5	29281	30049.1	37588
POS_2877	[M+H]+	2,6-DI-Tert-butylphenol	0.597519	0.59731	0.117587	207.174	9.138		Benzenoids	Benzene and substituted derivatives	Phenylpropanes	C14H22O	DKCPKDPYUFEZCP-UHFFFAOYSA-N	CC(C)(C)C1=CC=CC(=C1O)C(C)(C)C	20968.8	81561.7	81174.1	112340	95609.8	99603.7
POS_20622	[M+NH4]+	2,6-Dimethoxy-4-[(E)-3-(beta-D-glucopyranosyloxy)-1-propenyl]phenyl beta-D-glucopyranoside	0.0748348	0.700727	0.534212	552.229	3.55		Organic oxygen compounds	Organooxygen compounds	Carbohydrates and carbohydrate conjugates	C23H34O14	RYVGCUJETSKZDU-YQHZJLNZSA-N	COC1=C(OC2OC(CO)C(O)C(O)C2O)C(=CC(=C1)C=CCOC3OC(CO)C(O)C(O)C3O)OC	1786.23	1361.47	1729.72	1260.09	1354.12	4346.3
POS_3907	[M+H]+	2,6-Dimethyl-9-(propan-2-ylidene)-11-oxatricyclo[6.2.1.0^{1,5}]undec-6-en-8-ol	0.051376	1.23006	0.445751	235.168	6.406	C16942	Lipids and lipid-like molecules	Prenol lipids	Sesquiterpenoids	C15H22O2	ISFMXVMWEWLJGJ-UHFFFAOYSA-N	CC1CCC2C(=CC3(O)OC12CC3=C(C)C)C	286855	527225	337323	239953	389239	306860
POS_408	[M+H]+	2,6-Dimethylaniline	0.0336659	1.07397	0.720363	122.096	2.924	C11004	Benzenoids	Benzene and substituted derivatives	Xylenes	C8H11N	UFFBMTHBGFGIHF-UHFFFAOYSA-N	CC1=C(N)C(=CC=C1)C	7519.79	8791.41	5371.88	5601.61	8339.87	6248.18
POS_5390	[M+Na]+	2'-Deoxyadenosine	0.138367	1.02858	0.90693	274.089	1.216	C00559	Nucleosides, nucleotides, and analogues	Purine nucleosides	Purine 2'-deoxyribonucleosides	C10H13N5O3	OLXZPDWKRNYJJZ-RRKCRQDMSA-N	NC1=NC=NC2=C1N=C[N]2C3CC(O)C(CO)O3	32640.8	40035.4	28159.8	44718.9	21742.9	31572.2
POS_8207	[M+H]+	2'-Deoxyinosine 5'-monophosphate	0.289598	1.01517	0.96542	333.06	5.29		Nucleosides, nucleotides, and analogues	Purine nucleotides	Purine deoxyribonucleotides	C10H13N4O7P	PHNGFPPXDJJADG-RRKCRQDMSA-N	OC1CC(OC1CO[P](O)(O)=O)[N]2C=NC3=C2NC=NC3=O	444132	312089	136685	264670	366609	248282
POS_9117	[M+K]+	2',5,6-Trimethoxyflavone	0.0232451	1.16721	0.764907	351.067	2.923		Phenylpropanoids and polyketides	Flavonoids	O-methylated flavonoids	C18H16O5	IQWXFMQSQNSHKI-UHFFFAOYSA-N	COC1=CC=C2OC(=CC(=O)C2=C1OC)C3=C(OC)C=CC=C3	11507.7	12310.4	883.843	6806.14	7278.47	7078.59
POS_5230	[M+H]+	2',6'-Dihydroxy-4'-methoxychalcone	0.301599	0.606826	0.0492066	271.093	12.013		Phenylpropanoids and polyketides	Linear 1,3-diarylpropanoids	Chalcones and dihydrochalcones	C16H14O4	CUGDOWNTXKLQMD-BQYQJAHWSA-N	COC1=CC(=C(C(=C1)O)C(=O)\\C=C\\C2=CC=CC=C2)O	16509.3	21100.9	14260	33400.2	21787.5	30290.3
POS_15345	[M+H]+	20(R)-Protopanaxdiol	0.302527	0.89426	0.799934	461.397	11.286					C30H52O3	PYXFVCFISTUSOO-LPTJABRYSA-N	CC(=CCC[C@](C)(C1CC[C@@]2([C@@H]1[C@@H](C[C@H]3[C@]2(CC[C@@H]4[C@@]3(CC[C@@H](C4(C)C)O)C)C)O)C)O)C	20867.5	107565	137108	109072	66470.8	121396
POS_14183	[M+H]+	21-Hopen-3-one	4.97605	1.1148	0.919167	443.384	11.738		Lipids and lipid-like molecules	Prenol lipids	Hopanoids	C30H48O	NTZCFZIEUJGSQA-FAMROLOPSA-N	CC(C)=C1CC[C@@]2(C)[C@H]1CC[C@]3(C)[C@@H]2CC[C@@H]4[C@@]5(C)CCC(=O)C(C)(C)C5CC[C@@]34C	3.18397e+07	3.37488e+06	5.77181e+06	2.96752e+06	3.08564e+07	2.94169e+06
POS_14057	[M+H]+	22-Hydoxy-2-hopen-1-one	1.418	0.606116	0.26564	441.368	13.623		Lipids and lipid-like molecules	Prenol lipids	Hopanoids	C30H48O2	YLKHZBZGHNOEES-LISTXKHRSA-N	CC(C)(O)[C@H]1CC[C@@]2(C)[C@H]1CC[C@]3(C)[C@@H]2CC[C@H]4[C@@]3(C)CCC5C(C)(C)C=CC(=O)[C@]45C	16584.3	512162	629937	541310	671047	699295
POS_14182	[M+H]+	22-Hydroxy-6-hopanone	0.401291	1.32256	0.516955	443.383	13.144		Lipids and lipid-like molecules	Prenol lipids	Hopanoids	C30H50O2	MAVUFYZBQWGXHD-GZTHSXTLSA-N	CC(C)(O)[C@H]1CC[C@@]2(C)[C@H]1CC[C@]3(C)[C@@H]2CC[C@@H]4[C@@]5(C)CCCC(C)(C)C5C(=O)C[C@@]34C	163111	74908.6	71473.8	60709	115736	57566.1
POS_17652	[M+H]+	25-Acetoxy-20(S),24(R)-epoxy-3-oxodammarane	1.84702	0.731714	0.405261	501.389	11.43		Lipids and lipid-like molecules	Prenol lipids	Terpene glycosides	C32H52O4	QOIXKXFGILIXHU-PATLJMMGSA-N	CC(=O)OC(C)(C)[C@H]1CC[C@](C)(O1)[C@H]2CC[C@]3(C)[C@@H]2CC[C@@H]4[C@@]5(C)CCC(=O)C(C)(C)C5CC[C@@]34C	439111	1.58466e+06	2.16393e+06	2.29294e+06	1.54811e+06	1.88208e+06
POS_17531	[M+H]+	2a-Acetoxy-3,22-stictandione	1.17061	0.825273	0.179521	499.38	11.114		Lipids and lipid-like molecules	Prenol lipids	Sesquiterpenoids	C32H50O4	GSRPBBFLBACVKY-AJWNXJQWSA-N	CC(=O)OC1CC2(C)C(CC[C@@]3(C)C2CCC4C5(C)CCC(C)(C)C(=O)C5CCC34C)C(C)(C)C1=O	635610	874732	810201	1.05688e+06	944143	810822
POS_17805	[M+H]+	2alpha-Acetoxy-3beta,22alpha-stictandiol	6.15258	1.05963	0.723011	503.408	12.053		Lipids and lipid-like molecules	Prenol lipids	Sesquiterpenoids	C32H54O4	QZWMMIGRNYLXMG-XDRJWLFLSA-N	CC(=O)OC1CC2(C)C(CC[C@@]3(C)C2CCC4C5(C)CCC(C)(C)[C@H](O)C5CCC34C)C(C)(C)C1O	8.09281e+07	1.07962e+08	1.08354e+08	1.16517e+08	8.1511e+07	8.24894e+07
POS_4364	[M+H]+	2alpha-Hydroxyalantolactone	0.127313	1.17053	0.555367	249.11	8.584		Lipids and lipid-like molecules	Prenol lipids	Terpene lactones	C15H20O3	FZSKLHDEGWSLTB-ATYMOLOSSA-N	CC1CC(O)CC2(C)CC3OC(=O)C(=C)C3C=C12	78739.2	57643.8	54534.1	64580.8	29960.4	68561.7
POS_17258	[M+Na]+	2R,3S,4S,5R,6S)-2-[[(2R,3R,4R)-3,4-dihydroxy-4-(hydroxymethyl)oxolan-2-yl]oxymethyl]-6-[4-hydroxy-3-(3-methylbut-2-enyl)phenoxy]oxane-3,4,5-triol	0.1502	0.86814	0.0587253	495.179	5.527		Organic oxygen compounds	Organooxygen compounds	Carbohydrates and carbohydrate conjugates	C22H32O11	UEAATLOMPYZOFF-PYEGHPNJSA-N	CC(C)=CCC1=CC(=CC=C1O)OC2OC(COC3OCC(O)(CO)C3O)C(O)C(O)C2O	25538.6	21381.2	25509.9	28029.9	27363.8	28037.3
POS_31062	[M+H]+	3-(1H-indol-3-ylmethyl)-6,18-dimethyl-9-(2-methylpropyl)-12-(1-phenylethyl)-15-propan-2-yl-1,4,7,10,13,16,19-heptazacyclotricosane-2,5,8,11,14,17,20-heptone	0.180677	2.48564	0.172931	787.451	10.734		Organic acids and derivatives	Peptidomimetics	Hybrid peptides	C42H58N8O7	JYHXDMQYXCMDPF-UHFFFAOYSA-N	CC(C)CC1N=C(O)C(N=C(O)C(N=C(O)C(C)N=C(O)CCCN=C(O)C(CC2=C[NH]C3=C2C=CC=C3)N=C(O)C(C)N=C1O)C(C)C)C(C)C4=CC=CC=C4	10235.5	39493.1	28323.1	9819.51	4007.19	17574.4
POS_10389	[M+NH4]+	3-(2-Glucosyloxy-4-methoxyphenyl)propanoic acid	0.0632115	0.936173	0.823453	376.157	3.293		Organic oxygen compounds	Organooxygen compounds	Carbohydrates and carbohydrate conjugates	C16H22O9	LIVNOUBJFOXZOR-YMILTQATSA-N	COC1=CC=C(CCC(O)=O)C(=C1)OC2OC(CO)C(O)C(O)C2O	73172.4	47415.7	26955.5	60511	45295.1	51796.8
POS_1577	[M+H]+	3-(2-Hydroxyphenyl)propanoic acid	0.137103	0.612604	0.294122	167.068	3.026	C01198	Phenylpropanoids and polyketides	Phenylpropanoic acids		C9H10O3	CJBDUOMQLFKVQC-UHFFFAOYSA-N	OC(=O)CCC1=C(O)C=CC=C1	3841.9	3270.14	2647.65	2066.88	7622.21	6242.39
POS_8107	[M+Na]+	3-(2,4-Dihydroxypentyl)-6,8-dimethoxyisochromen-1-one	0.697996	0.750628	0.538317	331.117	5.232		Phenylpropanoids and polyketides	Isocoumarins and derivatives		C16H20O6	UGHXSOJROIYABR-UHFFFAOYSA-N	COC1=CC(=C2C(=O)OC(=CC2=C1)CC(O)CC(C)O)OC	36105.3	240139	158291	114319	246221	218356
POS_10015	[M+Na]+	3-(3,4-Dimethoxyphenyl)-1-(2-hydroxy-4,6-dimethoxyphenyl)propan-1-one	0.138423	0.985053	0.98272	369.127	7.412		Phenylpropanoids and polyketides	Linear 1,3-diarylpropanoids	Chalcones and dihydrochalcones	C19H22O6	MQEOTHTYNCMSAN-UHFFFAOYSA-N	COC1=CC(=C(C(=O)CCC2=CC=C(OC)C(=C2)OC)C(=C1)O)OC	3742.64	30089.7	17694	10252.5	7940.04	34115.6
POS_20328	[M+Na]+	3-(4-{[1,3-Dihydroxy-1-(4-hydroxy-3-methoxyphenyl)-2-propanyl]oxy}-3-methoxyphenyl)propyl 6-deoxy-alpha-L-mannopyranoside	0.321299	1.0027	0.977707	547.215	4.789		Lignans, neolignans and related compounds	Lignan glycosides		C26H36O11	HZGGHVGIXDRDDH-GQEDLCMVSA-N	COC1=C(O)C=CC(=C1)C(O)C(CO)OC2=C(OC)C=C(CCCO[C@@H]3O[C@@H](C)[C@H](O)[C@@H](O)[C@H]3O)C=C2	314737	274914	230113	265005	275213	277341
POS_9242	[M+Na]+	3-(4-Hydroxyphenyl)propanoic acid 3-(4-hydroxy-3-methoxyphenyl)propyl ester	0.517149	0.613125	0.103775	353.134	7.075		Benzenoids	Phenols	Methoxyphenols	C19H22O5	ZXQHQUXJMNGVJP-UHFFFAOYSA-N	COC1=CC(=CC=C1O)CCCOC(=O)CCC2=CC=C(O)C=C2	21169.1	62763.3	70093.4	88617.6	82055.6	80541.1
POS_14134	[M+Na]+	3-[(2S,3R,4S,5S,6R)-6-[[(2R,3R,4R)-3,4-dihydroxy-4-(hydroxymethyl)oxolan-2-yl]oxymethyl]-3,4,5-trihydroxyoxan-2-yl]oxy-2-methylpyran-4-one	0.13299	1.19619	0.605038	443.114	2.497		Organic oxygen compounds	Organooxygen compounds	Carbohydrates and carbohydrate conjugates	C17H24O12	OXNYNKGAOAFFBD-AHZIVMAWSA-N	CC1=C(OC2OC(COC3OCC(O)(CO)C3O)C(O)C(O)C2O)C(=O)C=CO1	24439.2	51429.4	23413.6	33362.5	26959.3	22676.9
POS_12880	[M+H]+	3-[(7S,8S)-5-Hydroxy-2,2,7,8-tetramethyl-6-oxo-7,8-dihydropyrano[3,2-g]chromen-10-yl]-3-phenylpropanoic acid	0.111237	0.636357	0.182399	423.178	4.278		Organoheterocyclic compounds	Benzopyrans	1-benzopyrans	C25H26O6	CEJSYHIZUAMEQV-CBVZESEGSA-N	CC1OC2=C(C(CC(O)=O)C3=CC=CC=C3)C4=C(C=CC(C)(C)O4)C(=C2C(=O)C1C)O	921.134	3452.68	2228.28	3797.22	2916.74	3660.87
POS_22707	[M+Na]+	3-[(Z)-5-[6-hydroxy-5,5,8a-trimethyl-2-methylidene-3-[3,4,5-trihydroxy-6-(hydroxymethyl)oxan-2-yl]oxy-3,4,4a,6,7,8-hexahydro-1H-naphthalen-1-yl]-3-methylpent-2-enoxy]-3-oxopropanoic acid	0.0839313	0.811301	0.726824	593.288	7.042		Lipids and lipid-like molecules	Prenol lipids	Terpene glycosides	C29H46O11	APZDDWSEXQOLKA-DHDCSXOGSA-N	CC(CCC1C(=C)C(CC2C(C)(C)C(O)CCC12C)OC3OC(CO)C(O)C(O)C3O)=CCOC(=O)CC(O)=O	1692.17	8327.92	4652.82	3912.64	10723.3	3449.75
POS_19905	[M+NH4]+	3-[[2,3-Dihydro-2-(4-hydroxy-3-methoxyphenyl)-3-(hydroxymethyl)-7-methoxybenzofuran]-5-yl]propyl beta-D-glucopyranoside	0.429773	0.737957	0.254999	540.24	4.504		Phenylpropanoids and polyketides	2-arylbenzofuran flavonoids		C26H34O11	DVWKMCPPEMUHBE-RAGYRXETSA-N	COC1=CC(=CC=C1O)C2OC3=C(OC)C=C(CCCOC4OC(CO)C(O)C(O)C4O)C=C3C2CO	45151.5	78578.5	71838.9	115971	69342.8	79699.7
POS_22528	[M+Na]+	3-[[6-[[1,4a-Dimethyl-6-methylidene-5-[2-(5-oxo-2H-furan-4-yl)ethyl]-3,4,5,7,8,8a-hexahydro-2H-naphthalen-1-yl]methoxy]-3,4,5-trihydroxyoxan-2-yl]methoxy]-3-oxopropanoic acid	0.305298	1.41209	0.139685	589.26	6.14		Lipids and lipid-like molecules	Prenol lipids	Terpene glycosides	C29H42O11	TZPGGHIYBMWPBI-UHFFFAOYSA-N	CC1(CCCC2(C)C(CCC3=CCOC3=O)C(=C)CCC12)COC4OC(COC(=O)CC(O)=O)C(O)C(O)C4O	80121	121108	131170	94529.2	71930.5	68935.8
POS_10610	[M+Na]+	3-[2-Methoxy-3-[(2S,3R,4S,5S,6R)-3,4,5-trihydroxy-6-(hydroxymethyl)oxan-2-yl]oxyphenyl]propanoic acid	0.449229	0.524301	0.141924	381.115	3.29		Organic oxygen compounds	Organooxygen compounds	Carbohydrates and carbohydrate conjugates	C16H22O9	VLHQGQCFFBCKMV-RSQMQNDGSA-N	COC1=C(CCC(O)=O)C=CC=C1O[C@@H]2O[C@H](CO)[C@@H](O)[C@H](O)[C@H]2O	2547.28	40785.5	25643.8	45907.4	38622.4	47029.3
POS_9902	[M+Na]+	3-[3-hydroxy-2-[(2S,3R,4S,5S,6R)-3,4,5-trihydroxy-6-(hydroxymethyl)oxan-2-yl]oxyphenyl]propanoic acid	0.626003	0.927075	0.787823	367.099	2.579		Organic oxygen compounds	Organooxygen compounds	Carbohydrates and carbohydrate conjugates	C15H20O9	APQFDHZCDLNMLA-APACUCGBSA-N	OC[C@H]1O[C@@H](OC2=C(CCC(O)=O)C=CC=C2O)[C@H](O)[C@@H](O)[C@@H]1O	200493	395173	332986	449810	314899	236992
POS_4472	[M-H2O+H]+	3-[4-Methyl-1-(2-methylpropanoyl)-3-oxocyclohexyl]butanoic acid	0.436422	0.850615	0.432975	251.162	6.319		Lipids and lipid-like molecules	Prenol lipids	Monoterpenoids	C15H24O4	ZIOCYJNRYIRTQD-UHFFFAOYSA-N	CC(C)C(=O)C1(CCC(C)C(=O)C1)C(C)CC(O)=O	437011	301236	250858	412228	434757	315825
POS_26569	[M+H]+	3-{1,10-dihydroxy-10-methyl-3-[2-methyl-4-(2,5,6,6-tetramethylcyclohex-1-en-1-yl)buta-1,3-dien-1-yl]-7-(1-oxopropan-2-ylidene)-2-oxaspiro[4.5]decan-6-yl}propyl dodecanoate	0.0849217	1.40113	0.355103	683.521	12.409					C43H70O6	CAEDYXLYBKMFFK-YNQJBBLQNA-N	O=CC(=C1CCC(O)(C)C2(CC(OC2O)C=C(C=CC3=C(C)CCC(C)C3(C)C)C)C1CCCOC(=O)CCCCCCCCCCC)C	18599.2	45638.4	26317.6	19119.7	25369.7	20140.9
POS_22560	[M+H-H2O]+	3-{12-hydroxy-12-[5'-(1-hydroxydodecyl)-[2,2'-bioxolan]-5-yl]dodecyl}-5-methyl-5H-furan-2-one	0.268446	1.13684	0.752326	589.479	12.642					C37H66O6	VFGUSTAQETWXSD-CWBQBTCINA-N	O=C1OC(C=C1CCCCCCCCCCCC(O)C2OC(CC2)C3OC(CC3)C(O)CCCCCCCCCCC)C	803542	1.16727e+06	447209	476818	1.10267e+06	547472
POS_21854	[M+H]+	3-{7-[5-(1-hydroxyhenicosa-4,8-dien-1-yl)oxolan-2-yl]heptyl}-5-methyl-5H-furan-2-one	0.954659	0.895436	0.812557	573.483	13.531					C37H64O4	FGFWSFXBCSXBEY-MLPZMSAMNA-N	O=C1OC(C=C1CCCCCCCC2OC(CC2)C(O)CCC=CCCC=CCCCCCCCCCCCC)C	98198.5	841105	976010	930806	635064	573103
POS_176	[M+H]+	3-Cyanopyridine	0.100018	1.23453	0.0835047	105.069	2.932		Organoheterocyclic compounds	Pyridines and derivatives	3-pyridinecarbonitriles	C6H4N2	GZPHSAQLYPIAIN-UHFFFAOYSA-N	N#CC1=CN=CC=C1	20570.1	23831.2	17928.9	16688.6	17256.1	16544.1
POS_19598	[M+Na]+	3-Deoxo-3-beta-Acetoxydeoxydihydrogedunin	0.154571	1.12504	0.578729	535.263	8.37		Organoheterocyclic compounds	Naphthopyrans		C30H40O7	HNFPPWVGLWDXQQ-UDYWQXAESA-N	CC(=O)OC1CCC2(C)C3CCC4(C)C(OC(=O)C=C4C3(C)C(CC2C1(C)C)OC(C)=O)C5=COC=C5	66991.7	46984.3	38805	46783	51712.8	37304.3
POS_15414	[M+Na]+	3-Ethyl-4-hydroxy-4-methylpentyl 6-O-[(2S,3R,4R)-tetrahydro-3,4-dihydroxy-4-(hydroxymethyl)-2-furanyl]-beta-D-glucopyranoside	0.0881465	1.06112	0.824088	463.21	4.766		Lipids and lipid-like molecules	Fatty Acyls	Fatty acyl glycosides	C19H36O11	ZHOUHFMRWBOCFO-RPIGWSNLSA-N	CCC(CCO[C@@H]1O[C@H](CO[C@H]2OC[C@](O)(CO)[C@H]2O)[C@@H](O)[C@H](O)[C@H]1O)C(C)(C)O	44576.8	76154.1	41836.9	45895.8	65282.9	42025.8
POS_21141	[M+Na]+	3-Hydroxy-1-(3-hydroxy-4-methoxyphenyl)-2-{4-[(1E)-3-hydroxy-1-propen-1-yl]-2-methoxyphenoxy}propyl beta-D-glucopyranoside	0.215287	0.898171	0.607172	561.19	4.11		Organic oxygen compounds	Organooxygen compounds	Carbohydrates and carbohydrate conjugates	C26H34O12	XBTCTDQFKYYTLT-JPNAWLBCSA-N	COC1=CC=C(C=C1O)C(O[C@@H]2O[C@H](CO)[C@@H](O)[C@H](O)[C@H]2O)C(CO)OC3=C(OC)C=C(\\C=C\\CO)C=C3	41194.8	41265	22234.6	32448.6	42580.1	41535.3
POS_13811	[M-H2O+H]+	3-Hydroxy-11-ursen-28,13-olide	1.11939	0.812325	0.485695	437.337	11.462		Lipids and lipid-like molecules	Prenol lipids	Triterpenoids	C30H46O3	UVBLDLGZDSGCSN-MWOWFCOASA-N	CC1CCC23CCC4(C)C5(C)CCC6C(C)(C)C(O)CCC6(C)C5C=CC4(OC2=O)C3C1C	611164	577278	290167	400467	654572	765180
POS_10801	[M+Na]+	3-Hydroxy-2-[3-methyl-2-[[3,4,5-trihydroxy-6-(hydroxymethyl)oxan-2-yl]oxymethyl]cyclopent-2-en-1-yl]propanoic acid	0.134454	1.12486	0.341325	385.144	5.498		Lipids and lipid-like molecules	Prenol lipids	Terpene glycosides	C16H26O9	IVUFRBWVXKXZMM-UHFFFAOYSA-N	CC1=C(COC2OC(CO)C(O)C(O)C2O)C(CC1)C(CO)C(O)=O	61609.1	59597.6	43851.9	48367.4	50346.9	48022.2
POS_15556	[M+Na]+	3-Hydroxy-3-(hydroxymethyl)-4-methylpentyl 6-O-[(2S,3R,4R)-3,4-dihydroxy-4-(hydroxymethyl)tetrahydro-2-furanyl]-beta-D-glucopyranoside	0.183304	0.843858	0.729646	465.193	3.946		Lipids and lipid-like molecules	Fatty Acyls	Fatty acyl glycosides	C18H34O12	MHJYRHBCBPGGHL-IFTGIQGKSA-N	CC(C)C(O)(CO)CCO[C@@H]1O[C@H](CO[C@H]2OC[C@](O)(CO)[C@H]2O)[C@@H](O)[C@H](O)[C@H]1O	4427.17	29878.6	12713.1	15142.4	22787.3	17789.3
POS_21385	[M+H]+	3-Hydroxy-3',4'-didehydro-beta,psi-caroten-4-one	0.31074	0.856105	0.714873	565.397	11.045		Lipids and lipid-like molecules	Prenol lipids	Tetraterpenoids	C40H52O2	JQSLJBXSPJMQQS-ZGZGHAEGSA-N	CC(C)=C/C=C/C(C)=C/C=C/C(C)=C/C=C/C(C)=C/C=C/C=C(C)/C=C/C=C(C)/C=C/C1=C(C)C(=O)C(O)CC1(C)C	8144.45	80627.1	67141.1	62169.1	59585.2	60364.3
POS_12479	[M+H-H2O]+	3-Hydroxy-8'-apo-epsilon-caroten-8'-al	0.133222	0.92025	0.84216	415.298	11.271					C30H40O2	SPBPMWXNKPPVSX-LHMJRBLPNA-N	O=CC(=CC=CC(=CC=CC=C(C=CC=C(C=CC1C(=CC(O)CC1(C)C)C)C)C)C)C	2763.77	21239.5	19159.7	16261.8	16121.8	14519.9
POS_1515	[M+H]+	3-Hydroxycinnamic acid	0.16682	0.962055	0.885362	165.052	9.837	C12621	Phenylpropanoids and polyketides	Cinnamic acids and derivatives	Hydroxycinnamic acids and derivatives	C9H8O3	KKSDGJDHHZEWEP-SNAWJCMRSA-N	OC(=O)C=CC1=CC(=CC=C1)O	130816	107569	113810	127484	68713.4	169889
POS_1202	[M+H]+	3-Hydroxyphenylacetic acid	0.111348	0.831825	0.340178	153.053	2.676	C05593	Benzenoids	Phenols	1-hydroxy-4-unsubstituted benzenoids	C8H8O3	FVMDYYGIDFPZAX-UHFFFAOYSA-N	OC(=O)CC1=CC(=CC=C1)O	5256.2	8477.33	5880.66	7819.71	9128.69	6631.29
POS_131	[M+H]+	3-Hydroxypyridine	0.0689944	0.876668	0.85961	96.0423	1.631		Organoheterocyclic compounds	Pyridines and derivatives	Hydroxypyridines	C5H5NO	GRFNBEZIAWKNCO-UHFFFAOYSA-N	OC1=CN=CC=C1	1333.55	4189.71	431.469	4134.46	1654.21	1003.78
POS_74	[M-C6H10O5+H]+	3-Methyl-3-buten-2-one	0.138049	0.378124	0.165195	85.0643	2.051					C5H8O	ZGHFDIIVVIFNPS-UHFFFAOYSA-N	C=C(C)C(=O)C	509.857	1893.12	1792.02	2526.06	2310.89	6257.3
POS_2225	[M+H]+	3-n-Butylphathlide	0.319231	2.91098	0.288532	191.105	7.349					C12H14O2	HJXMNVQARNZTEE-UHFFFAOYSA-N	CCCCC1C2=CC=CC=C2C(=O)O1	41977.2	11183.5	7716.99	7644.6	6389	6879.55
POS_12194	[M+Na]+	3-O-Methylfunicone	0.0776774	0.487364	0.373095	411.103	2.616		Organic oxygen compounds	Organooxygen compounds	Carbonyl compounds	C20H20O8	WGLRJONCGNNMKL-VOTSOKGWSA-N	COC(=O)C1=C(C(=O)C2=COC(=C(OC)C2=O)C=CC)C(=CC(=C1)OC)OC	11.0537	1417.6	876.885	2917.45	587.604	1225.58
POS_796	[M+H]+	3,4-Dihydroxybenzaldehyde	0.845286	13.9783	0.37191	139.039	3.068	C16700	Organic oxygen compounds	Organooxygen compounds	Carbonyl compounds	C7H6O3	IBGBGRVKPALMCQ-UHFFFAOYSA-N	OC1=CC=C(C=O)C=C1O	282487	12742.9	2419.74	4679.64	8922.8	7691.2
POS_15210	[M+H]+	3,5,5-trimethyl-4-(3,7,12,16,18-pentamethylnonadeca-1,3,5,7,9,11,13,15-octaen-1-yl)cyclohex-2-en-1-one	1.57408	3.72579	0.374805	459.361	11.921					C33H46O	OLOIPLDBLGXQBC-WPRSTXHRNA-N	O=C1C=C(C)C(C=CC(=CC=CC(=CC=CC=C(C=CC=C(C)CC(C)C)C)C)C)C(C)(C)C1	1.08064e+06	137118	98030.1	105769	146863	100524
POS_10282	[M+H]+	3,5,5-Trimethyl-4-[3-(beta-D-glucopyranosyloxy)butyl]-2-cyclohexene-1-one	0.620687	0.787437	0.269477	373.221	5.507		Lipids and lipid-like molecules	Fatty Acyls	Fatty acyl glycosides	C19H32O7	NYLNHNDMNOPWAZ-ZEGIJQCCSA-N	CC(CCC1C(=CC(=O)CC1(C)C)C)O[C@@H]2O[C@H](CO)[C@@H](O)[C@H](O)[C@H]2O	115843	187586	111125	197862	146048	182549
POS_11439	[M+Na]+	3,5,5-Trimethyl-4-[3-[(beta-D-glucopyranosyl)oxy]butyl]-3-cyclohexen-1-ol	0.150396	2.4951	0.275918	397.214	6.329		Lipids and lipid-like molecules	Fatty Acyls	Fatty acyl glycosides	C19H34O7	QOLJILMTPKQQQA-KWEBYEANSA-N	CC(CCC1=C(C)CC(O)CC1(C)C)OC2OC(CO)C(O)C(O)C2O	6318.59	37784.8	16347.7	8394.35	3829.86	12003.7
POS_10923	[M+H]+	3,5,5-Trimethyl-4beta-hydroxy-4-[3-(beta-D-glucopyranosyloxy)-1-butenyl]-2-cyclohexene-1-one	1.60643	0.698355	0.446272	387.201	4.001		Lipids and lipid-like molecules	Fatty Acyls	Fatty acyl glycosides	C19H30O8	SWYRVCGNMNAFEK-CLCVOTHJSA-N	CC(O[C@@H]1O[C@H](CO)[C@@H](O)[C@H](O)[C@H]1O)\\C=C\\[C@@]2(O)C(=CC(=O)CC2(C)C)C	21666.9	1.06849e+06	723352	902915	806401	887512
POS_6204	[M+Na]+	3,6-Diphenylcyclohexan-1,2-diol	0.197757	1.13827	0.785716	291.118	6.29		Organic oxygen compounds	Organooxygen compounds	Alcohols and polyols	C18H20O2	KIDYUEHQXIEBGK-UHFFFAOYSA-N	OC1C(O)C(CCC1C2=CC=CC=C2)C3=CC=CC=C3	26389.4	28613.9	49216.7	54948.1	13195.7	23416.5
POS_3294	[M+H]+	3,8-Dimethyl-5-propan-2-yl-4a,5,6,8a-tetrahydro-1H-naphthalen-2-one	0.318965	0.821901	0.784948	219.171	9.11		Lipids and lipid-like molecules	Prenol lipids	Sesquiterpenoids	C15H22O	LMILVXQXGKTFSZ-UHFFFAOYSA-N	CC(C)C1CC=C(C)C2CC(=O)C(=CC12)C	293742	84455.4	72942.5	128385	350723	69790.4
POS_3869	[M+H]+	3',5'-Dimethoxy-4'-hydroxyacetophenone	0.00646146	1.05163	0.929529	235.076	8.465		Organic oxygen compounds	Organooxygen compounds	Carbonyl compounds	C10H12O4	OJOBTAOGJIWAGB-UHFFFAOYSA-N	COC1=CC(=CC(=C1O)OC)C(C)=O	191.998	440.999	1166.17	389.712	773.901	547.233
POS_6317	[M+H]+	3alpha,17beta-Dihydroxy-5alpha-androstane	0.171247	0.93086	0.886937	293.245	11.658		Lipids and lipid-like molecules	Steroids and steroid derivatives	Androstane steroids	C19H32O2	CBMYJHIOYJEBSB-UHFFFAOYSA-N	CC12CCC3C(CCC4CC(O)CCC34C)C1CCC2O	43576.5	18406.4	11022.5	15915.8	38835.4	23676.8
POS_12066	[M+K]+	4-(1,3-Benzodioxol-5-ylmethyl)-3-[(3,4-dimethoxyphenyl)methyl]oxolan-2-one	0.687195	0.959665	0.943239	409.102	6.621		Lignans, neolignans and related compounds	Furanoid lignans	Tetrahydrofuran lignans	C21H22O6	IYBDDRJHJMFFBB-UHFFFAOYSA-N	COC1=C(OC)C=C(CC2C(COC2=O)CC3=CC4=C(OCO4)C=C3)C=C1	669121	222651	103761	216674	427513	393189
POS_13630	[M+Na]+	4-[(2R,3R,4S,5S,6R)-3,4,5-trihydroxy-6-(hydroxymethyl)oxan-2-yl]oxypentan-2-yl (E)-3-(4-hydroxyphenyl)prop-2-enoate	0.100854	0.737305	0.398393	435.163	6.166		Lipids and lipid-like molecules	Fatty Acyls	Fatty acyl glycosides	C20H28O9	RMFDCHYDPYVNFA-AKVWERCLSA-N	CC(CC(C)OC(=O)C=CC1=CC=C(O)C=C1)OC2OC(CO)C(O)C(O)C2O	3418.64	4768.67	6013.95	9650.73	4571.25	5039.04
POS_10374	[M-H2O+H]+	4-[(3R,5R,8R,9S,12S,14S,17R)-3,12-Dihydroxy-10,13-dimethyl-2,3,4,5,6,7,8,9,11,12,14,15,16,17-tetradecahydro-1H-cyclopenta[a]phenanthren-17-yl]pentanoic acid	0.27656	1.24615	0.724086	375.288	10.716		Lipids and lipid-like molecules	Steroids and steroid derivatives	Bile acids, alcohols and derivatives	C24H40O4	KXGVEGMKQFWNSR-BKAWJTANSA-N	C[C@H](CCC(O)=O)[C@H]1CC[C@H]2[C@@H]3CC[C@@H]4C[C@H](O)CC[C@]4(C)[C@H]3C[C@H](O)[C@]12C	5787.06	211390	127920	99409.1	80768.5	96752.9
POS_12107	[M+H]+	4-[10-(5-hydroxy-3,5,6-trimethyl-2,6-dihydropyran-2-yl)undeca-1,3,5,7,9-pentaen-1-yl]-2,4,5-trimethylcyclopent-2-en-1-one	0.346824	1.30283	0.466115	409.27	10.386					C27H36O3	AWKOIWWVZPOTLM-OHCNXAEMNA-N	O=C1C(=CC(C=CC=CC=CC=CC=C(C)C2OC(C)C(O)(C=C2C)C)(C)C1C)C	97138.2	202504	109130	134338	115328	64091.4
POS_10155	[M-H2O+H]+	4-[3-(Beta-D-glucopyranosyloxy)-4-hydroxy-2,6,6-trimethyl-1-cyclohexen-1-yl]-2-butanone	0.130345	0.691072	0.456574	371.205	3.064		Lipids and lipid-like molecules	Prenol lipids	Terpene glycosides	C19H32O8	JVIDANAJZDBKRL-FJUMDGKUSA-N	CC(=O)CCC1=C(C)C(O[C@@H]2O[C@H](CO)[C@@H](O)[C@H](O)[C@H]2O)C(O)CC1(C)C	101.638	7276	4926.65	6913.05	6329.35	4562.25
POS_6432	[M+H]+	4-[4-(2-Chlorophenyl)piperazin-1-yl]-4-oxobutanoic acid	0.0860417	0.78421	0.566627	297.091	4.137		Organoheterocyclic compounds	Diazinanes	Piperazines	C14H17ClN2O3	FMKKWAHJJLLAOW-UHFFFAOYSA-N	OC(=O)CCC(=O)N1CCN(CC1)C2=C(Cl)C=CC=C2	5152.68	8834.1	5455.66	9116.51	12288.1	3387.74
POS_12086	[M+Na]+	4-[4-(beta-D-Glucopyranosyloxy)-2-hydroxy-2,6,6-trimethylcyclohexylidene]-3-buten-2-one	0.345128	0.66324	0.228513	409.176	5.47		Lipids and lipid-like molecules	Prenol lipids	Terpene glycosides	C19H30O8	OSUSRWMGHUUXBY-OHWUEDFNSA-N	CC(=O)[CH]=[C]=[C]1C(C)(C)CC(CC1(C)O)O[C@@H]2O[C@H](CO)[C@@H](O)[C@H](O)[C@H]2O	9350.04	38652.9	31572.3	45558.1	40775.7	33645.5
POS_16323	[M+NH4]+	4-[5-[[4-[5-[Acetyl(hydroxy)amino]pentylamino]-4-oxobutanoyl]-hydroxyamino]pentylamino]-4-oxobutanoic acid	1.07833	2.29984	0.413507	478.289	10.697		Lipids and lipid-like molecules	Fatty Acyls	Fatty amides	C20H36N4O8	VJQANBSDAGCDJE-UHFFFAOYSA-N	CC(=O)N(O)CCCCCN=C(O)CCC(=O)N(O)CCCCCN=C(O)CCC(O)=O	611252	99693	112544	98718.6	91469.5	167875
POS_6768	[M+H]+	4-[Formyl(6-methoxyquinolin-8-yl)amino]pentanoic acid	0.222724	1.28483	0.503331	303.135	4.095		Organoheterocyclic compounds	Quinolines and derivatives		C16H18N2O4	HWLCTPIUUFQVEK-UHFFFAOYSA-N	COC1=CC2=CC=CN=C2C(=C1)N(C=O)C(C)CCC(O)=O	52348.8	25773.4	20845.6	22146.8	28357.2	26523.9
POS_15734	[M+Na]+	4-Acetyl-2-hydroxyphenyl 2-O-beta-D-fructofuranosyl-beta-D-xylopyranoside	0.135395	1.00534	0.993339	469.132	3.415		Organic oxygen compounds	Organooxygen compounds	Carbohydrates and carbohydrate conjugates	C19H26O12	YOBMRYYTHXIXSD-SMTILKTDSA-N	CC(=O)C1=CC=C(O[C@@H]2OC[C@@H](O)[C@H](O)[C@H]2O[C@]3(CO)O[C@H](CO)[C@@H](O)[C@@H]3O)C(=C1)O	8896.39	42406.4	12525.4	9011.03	33340.6	21137.4
POS_424	[M+H]+	4-Dimethylaminopyridine	0.065931	0.971924	0.760694	123.09	14.338		Organic nitrogen compounds	Organonitrogen compounds	Amines	C7H10N2	VHYFNPMBLIVWCW-UHFFFAOYSA-N	CN(C)C1=CC=NC=C1	15420.2	14323.8	16781.7	15671.4	14078.2	18120.2
POS_964	[M+H]+	4-Guanidinobutyric acid	0.524055	0.807672	0.577568	146.091	1.3	C01035	Organic acids and derivatives	Carboxylic acids and derivatives	Amino acids, peptides, and analogues	C5H11N3O2	TUHVEAJXIMEOSA-UHFFFAOYSA-N	NC(=N)NCCCC(O)=O	124838	185503	109434	271256	107966	140513
POS_2638	[M+H]+	4-Hydroxy-1-(2-hydroxyethyl)-2,2,6,6-tetramethylpiperidine	0.0905318	1.15848	0.284356	202.181	1.606		Organoheterocyclic compounds	Piperidines		C11H23NO2	STEYNUVPFMIUOY-UHFFFAOYSA-N	CC1(C)CC(O)CC(C)(C)N1CCO	41194.6	44790.2	31411.2	35410.1	30430.4	35495.7
POS_8685	[M-H2O+H]+	4-Hydroxy-3-[(2E,6E)-4-hydroxy-3,7,11-trimethyldodeca-2,6,10-trienyl]benzoic acid	0.221834	1.31053	0.530154	341.207	10.009		Lipids and lipid-like molecules	Prenol lipids	Sesquiterpenoids	C22H30O4	LSQRGMPMJOCLHX-GONBZBRSSA-N	CC(C)=CCCC(C)=CCC(O)C(C)=CCC1=CC(=CC=C1O)C(O)=O	21482.7	66885.2	41621.5	47346.4	26671.1	25170.7
POS_1900	[M+H]+	4-Hydroxy-3-methoxycinnamaldehyde	0.605845	0.355	0.0982175	179.068	4.634	C02666	Benzenoids	Phenols	Methoxyphenols	C10H10O3	DKZBBWMURDFHNE-NSCUHMNNSA-N	COC1=CC(=CC=C1O)C=CC=O	9217.05	39539.1	14086.1	31827.8	61516	83676.8
POS_13258	[M+H]+	4-Hydroxy-6-methyl-3-methylidene-5-[5-[(2R,3R,4S,5S,6R)-3,4,5-trihydroxy-6-(hydroxymethyl)oxan-2-yl]oxypentan-2-yl]-3a,4,7,7a-tetrahydro-1-benzofuran-2-one	0.282783	0.747958	0.554815	429.205	3.551		Lipids and lipid-like molecules	Prenol lipids	Terpene lactones	C21H32O9	HYMAKZYMIDUXML-BTUKQMCYSA-N	CC(CCCO[C@@H]1O[C@H](CO)[C@@H](O)[C@H](O)[C@H]1O)C2=C(C)CC3OC(=O)C(=C)C3C2O	2881.2	45360.4	26099.8	35173.3	39130	25089.3
POS_789	[M+H]+	4-Hydroxybenzoic acid	0.0895546	0.496804	0.198307	139.037	4.557	C00156	Benzenoids	Benzene and substituted derivatives	Benzoic acids and derivatives	C7H6O3	FJKROLUGYXJWQN-UHFFFAOYSA-N	OC(=O)C1=CC=C(O)C=C1	5963.69	1286.72	890.905	6713.21	5483.8	4190.38
POS_1113	[M+H]+	4-Hydroxymandelonitrile	0.338273	1.35908	0.505661	150.053	2.356		Benzenoids	Phenols	1-hydroxy-2-unsubstituted benzenoids	C8H7NO2	HOOOPXDSCKBLFG-UHFFFAOYSA-N	OC(C#N)C1=CC=C(O)C=C1	118254	56245.3	34927.6	45449.1	50674.6	57970.9
POS_901	[M+H]+	4-Methyl-5-thiazoleethanol	0.1859	0.739484	0.290481	144.048	3.257	C04294	Organoheterocyclic compounds	Azoles	Thiazoles	C6H9NOS	BKAWJIRCKVUVED-UHFFFAOYSA-N	CC1=C(CCO)SC=N1	13066.3	13440.9	7121.87	10740.6	19460.4	15275.4
POS_1466	[M+H]+	4-Methylcinnamic acid	0.514608	2.09934	0.446341	163.075	3.86		Phenylpropanoids and polyketides	Cinnamic acids and derivatives	Cinnamic acids	C10H10O2	RURHILYUWQEGOS-VOTSOKGWSA-N	CC1=CC=C(C=C1)\\C=C\\C(O)=O	151931	29313.4	22595.1	38348.7	32101.2	26647
POS_21504	[M+H]+	4-Oxogazaniaxanthin	0.352857	0.661754	0.138155	567.414	11.195		Lipids and lipid-like molecules	Prenol lipids	Tetraterpenoids	C40H54O2	BHDQEDUHXBQKIH-APUCIYKZSA-N	CC(C)=CCCC(/C)=C/C=C/C(C)=C/C=C/C(C)=C/C=C/C=C(C)/C=C/C=C(C)/C=C/C1=C(C)C(=O)C(O)CC1(C)C	15269.1	34188.7	41751.5	45482.5	41105.7	51241.4
POS_14685	[M-2H2O+H]+	4,4,8,10,14-Pentamethyl-17-(4,5,6-trihydroxy-6-methylheptan-2-yl)-2,5,6,7,9,15-hexahydro-1H-cyclopenta[a]phenanthrene-3,16-dione	1.53935	0.360031	0.125105	451.32	9.834		Lipids and lipid-like molecules	Prenol lipids	Triterpenoids	C30H46O5	PGQUPZCFLHXEHV-UHFFFAOYSA-N	CC(CC(O)C(O)C(C)(C)O)C1=C2C=CC3C4(C)CCC(=O)C(C)(C)C4CCC3(C)C2(C)CC1=O	90038.4	231330	112755	153398	556755	495640
POS_11230	[M+H]+	4,9,13-trimethyl-15-(2,6,6-trimethylcyclohex-1-en-1-yl)pentadeca-2,4,6,8,10,12,14-heptaenoic acid	0.200042	0.803481	0.514045	393.274	11.077					C27H36O2	VIAXZJZCXWZOOV-KSMLSKHQSA-N	O=C(O)C=CC(=CC=CC=C(C=CC=C(C=CC1=C(C)CCCC1(C)C)C)C)C	11258.4	27906.4	42931.2	32585.2	31609.6	37980.7
POS_8230	[M+Na]+	4'-Hydroxy-3',4,5',6,6',7-hexamethylspiro[2-oxabicyclo[2.2.2]octane-8,2'-oxane]-3,5-dione	0.618324	0.881096	0.591317	333.166	7.102		Organoheterocyclic compounds	Lactones	Delta valerolactones	C17H26O5	CVPVGRDVSAJUQS-UHFFFAOYSA-N	CC1OC2(C(C)C(O)C1C)C(C)C3OC(=O)C2(C)C(=O)C3C	285762	204695	192215	186906	250001	337891
POS_4513	[M+H]+	4'-Methoxyflavone	0.551297	0.715784	0.544139	253.083	7.225		Phenylpropanoids and polyketides	Flavonoids	O-methylated flavonoids	C16H12O3	OMICQBVLCVRFGN-UHFFFAOYSA-N	COC1=CC=C(C=C1)C2=CC(=O)C3=C(O2)C=CC=C3	1427.35	140742	73396.4	131325	84874	84961.4
POS_14770	[M+H]+	4'-O-b-D-Glucosyl-5-O-methylvisamminol	0.205247	2.1731	0.280835	453.169	5.535		Organoheterocyclic compounds	Benzopyrans	1-benzopyrans	C22H28O10	QVGFPTYGKPLXPK-OOBAEQHESA-N	COC1=C2CC(OC2=CC3=C1C(=O)C=C(C)O3)C(C)(C)OC4OC(CO)C(O)C(O)C4O	18314.2	5524.01	5782.47	4152.56	5901.82	3576.25
POS_10892	[M+Na]+	4a,5,7-Trihydroxy-7-methyl-1,4a,5,6,7,7a-hexahydrocyclopenta[c]pyran-1-yl beta-D-glucopyranoside	0.119629	0.478432	0.0125365	387.127	3.582		Lipids and lipid-like molecules	Prenol lipids	Terpene glycosides	C15H24O10	XUWSHXDEJOOIND-MEVVXUJLSA-N	CC1(O)CC(O)C2(O)C=COC(OC3OC(CO)C(O)C(O)C3O)C12	1485.58	2205.85	1038.72	3711.93	3074.7	3100.15
POS_2941	[M-H2O+H]+	5-(6-Methyl-6-hydroxyoctyl)furan-2(5H)-one	0.331044	0.894611	0.524903	209.152	5.164		Organoheterocyclic compounds	Dihydrofurans	Furanones	C13H22O3	SYVFGLXUEAXFAP-UHFFFAOYSA-N	CCC(C)(O)CCCCCC1OC(=O)C=C1	57091.9	93392.3	61224.3	73877.1	85209.4	77562.1
POS_3540	[M+H]+	5-(6-Methyl-7-oxooctyl)furan-2(5H)-one	1.40373	0.736016	0.464742	225.149	4.005		Organoheterocyclic compounds	Dihydrofurans	Furanones	C13H20O3	MSOHKYKACHEERC-UHFFFAOYSA-N	CC(CCCCCC1OC(=O)C=C1)C(C)=O	101851	912193	587498	773311	674977	727673
POS_15651	[M+Na]+	5-[(1R,3S,5R,8S)-3-(beta-D-glucopyranosyloxy)-8-hydroxy-1,5-dimethyl-6-oxabicyclo[3.2.1]oct-8-yl]-3-methyl-, (2Z,4E)-2,4-pentadienoic acid	1.13474	0.888292	0.533526	467.187	3.122		Lipids and lipid-like molecules	Prenol lipids	Sesquiterpenoids	C21H32O10	UHHVHDDICOEBTQ-QCJIOVKVSA-N	CC(\\C=C\\[C@]1(O)[C@@]2(C)CO[C@]1(C)C[C@@H](C2)O[C@@H]3O[C@H](CO)[C@@H](O)[C@H](O)[C@H]3O)=C\\C(O)=O	1.67328e+06	1.592e+06	888626	1.56196e+06	1.65832e+06	1.45601e+06
POS_26933	[M+H]+	5-[(3S,8R,10R,13R,14S,17R)-3-[(2R,3R,4R,5S,6R)-3,4-Dihydroxy-6-(hydroxymethyl)-5-[(2S,3R,4R,5R,6S)-3,4,5-trihydroxy-6-methyloxan-2-yl]oxyoxan-2-yl]oxy-14-hydroxy-10,13-dimethyl-1,2,3,6,7,8,9,11,12,15,16,17-dodecahydrocyclopenta[a]phenanthren-17-yl]pyran-2-one	0.190539	0.64457	0.284678	693.344	10.739		Lipids and lipid-like molecules	Steroids and steroid derivatives	Steroid lactones	C36H52O13	KKOLMSSIDZXPLS-YIWDLVGLSA-N	CC1OC(OC2C(O)C(O)C(OC3CCC4(C)C5CCC6(C)C(CCC6(O)C5CCC4=C3)C7=COC(=O)C=C7)OC2CO)C(O)C(O)C1O	6775.5	7169.34	8336.64	6989.08	9671.28	17907.6
POS_4015	[M+H]+	5-Cyclohexadecen-1-one	0.0619041	1.15722	0.233105	237.233	7.838		Organic oxygen compounds	Organooxygen compounds	Carbonyl compounds	C16H28O	ABRIMXGLNHCLIP-UHFFFAOYSA-N	O=C1CCCCCCCCCCC=CCCC1	44535.4	50475.5	56840.2	37017.4	47600.6	46602.5
POS_4969	[M+H-H2O]+	5-dodecyl-4-hydroxy-4-methylcyclopent-2-en-1-one	0.696315	0.768045	0.508693	263.236	11.939					C18H32O2	HWMQXCKSSOGAEL-PWQNQZOANA-N	O=C1C=CC(O)(C)C1CCCCCCCCCCCC	232680	143187	93768.8	101901	258640	250928
POS_1465	[M+H]+	5-Hydroxy-1-tetralone	0.155894	0.853737	0.512498	163.075	4.158					C10H10O2	YPPZCRZRQHFRBH-UHFFFAOYSA-N	C1CC2=C(C=CC=C2O)C(=O)C1	31291.6	26804.3	15021.5	25992.3	34921.7	24730.1
POS_15166	[M+Na]+	5-Hydroxy-7-[4-hydroxy-2-methoxy-3-(3-methylbut-2-enyl)phenyl]-2,2-dimethyl-7,8-dihydropyrano[3,2-g]chromen-6-one	0.227061	0.565245	0.279365	459.183	3.595		Phenylpropanoids and polyketides	Isoflavonoids	Isoflavans	C26H28O6	QJFJALJGKXGWFO-UHFFFAOYSA-N	COC1=C(C=CC(=C1CC=C(C)C)O)C2COC3=CC4=C(C=CC(C)(C)O4)C(=C3C2=O)O	364.402	14260.9	5714.57	10016.9	13343.7	12623.5
POS_3302	[M-2H2O+H]+	5-hydroxyculmorin	0.0934038	0.979436	0.921357	219.173	11.503		Lipids and lipid-like molecules	Prenol lipids	Monoterpenoids	C15H26O3	XFKGEQRMYJCXFK-YTAGIEBCSA-N	CC1(C)[C@H](O)CC[C@]2(C)[C@H]3[C@H](O)C[C@]2(C)C(O)[C@@H]13	103781	88781.8	148997	135795	123286	89651.2
POS_485	[M+H]+	5-Hydroxymethylfurfural	1.22008	0.551022	0.688251	127.038	7.551					C6H6O3	NOEGNKMFWQHSLB-UHFFFAOYSA-N	C1=C(OC(=C1)C=O)CO	26641.5	183408	421251	1.14252e+06	2745.38	420.794
POS_22597	[M+Na]+	5-Methoxy-3-methyl-4-[(2S,3R,4S,5S,6R)-3,4,5-trihydroxy-6-[[(2R,3R,4S,5S,6R)-3,4,5-trihydroxy-6-(hydroxymethyl)oxan-2-yl]oxymethyl]oxan-2-yl]oxy-3H-benzo[f][2]benzofuran-1-one	0.0832363	0.787939	0.721852	591.163	4.796		Organic oxygen compounds	Organooxygen compounds	Carbohydrates and carbohydrate conjugates	C26H32O14	PAEOIXITAYMQRF-BYSCJPLWSA-N	COC1=CC=CC2=C1C(=C3C(C)OC(=O)C3=C2)OC4OC(COC5OC(CO)C(O)C(O)C5O)C(O)C(O)C4O	1159.64	4215.15	960.938	583.201	3846.9	3610.78
POS_4514	[M+H]+	5-Methoxyflavone	0.355552	0.0976656	0.171891	253.087	7.343		Phenylpropanoids and polyketides	Flavonoids	O-methylated flavonoids	C16H12O3	XRQSPUXANRGDAV-UHFFFAOYSA-N	COC1=C2C(=O)C=C(OC2=CC=C1)C3=CC=CC=C3	4674.19	464.76	158.203	21.1817	33286.7	20929.7
POS_2813	[M+H]+	5-Methoxyindole-3-acetic acid	0.958341	1.97332	0.45801	206.082	9.508	C05660	Organoheterocyclic compounds	Indoles and derivatives	Indolyl carboxylic acids and derivatives	C11H11NO3	COCNDHOPIHDTHK-UHFFFAOYSA-N	COC1=CC2=C([NH]C=C2CC(O)=O)C=C1	69661	383394	328980	378578	8918.79	8807.82
POS_5059	[M+H]+	5-Methyl-7-methoxyisoflavone	0.499988	1.13276	0.861781	267.102	7.319					C17H14O3	WGOUYULOZZRTFS-UHFFFAOYSA-N	CC1=CC(=CC2=C1C(=O)C(=CO2)C3=CC=CC=C3)OC	407652	130814	33658.3	120942	127586	256542
POS_474	[M+H]+	5-Methylcytosine	0.132054	1.18631	0.342036	126.065	1.235	C02376	Organoheterocyclic compounds	Diazines	Pyrimidines and pyrimidine derivatives	C5H7N3O	LRSASMSXMSNRBT-UHFFFAOYSA-N	CC1=C(N)NC(=O)N=C1	24978.8	31832.8	24223.8	28776.1	18388.4	21144.1
POS_14894	[M+Na]+	5‐(1‐benzofuran‐2‐yl)‐N,N‐dimethyl‐2‐[4‐(piperazin‐1‐yl)phenyl]‐1,3‐thiazole‐4‐carboxamide	0.184596	0.661606	0.391536	455.149	3.09		Organoheterocyclic compounds	Diazinanes	Piperazines	C24H24N4O2S	UMTLULRIWDACNW-UHFFFAOYSA-N	CN(C)C(=O)C1=C(SC(=N1)C2=CC=C(C=C2)N3CCNCC3)C4=CC5=C(O4)C=CC=C5	659.396	12532.6	7351.32	8083.92	12300.9	10665.8
POS_10364	[M+H]+	5,5,9,13-tetramethyl-7-(phenylmethylidene)tetracyclo[11.2.1.01,10.04,9]hexadec-14-en-6-one	0.269656	1.30299	0.18288	375.264	10.665					C27H34O	GTBFQOGSRWBGDY-OLVXXURPNA-N	O=C1C(=CC=2C=CC=CC2)CC3(C)C4CCC5(C=CC4(CCC3C1(C)C)C5)C	139793	228113	197724	157446	128737	147920
POS_5330	[M+H]+	5,7-Dihydroxy-2-(4-hydroxyphenyl)chroman-4-one	0.160125	0.949408	0.909288	273.076	4.878		Phenylpropanoids and polyketides	Flavonoids	Flavans	C15H12O5	FTVWIRXFELQLPI-UHFFFAOYSA-N	OC1=CC=C(C=C1)C2CC(=O)C3=C(O)C=C(O)C=C3O2	43129.7	19070.1	9560.09	18853.3	27092.4	29638
POS_5903	[M+H]+	5,7-Dimethoxyflavanone	0.256876	1.02088	0.966295	285.11	7.169		Phenylpropanoids and polyketides	Flavonoids	O-methylated flavonoids	C17H16O4	IAFBOKYTDSDNHV-UHFFFAOYSA-N	COC1=CC(=C2C(=O)CC(OC2=C1)C3=CC=CC=C3)OC	51701.4	37493.9	19789.5	8662.97	53538.4	44554.5
POS_5776	[M+H]+	5,7-Dimethoxyflavone	0.200066	0.978976	0.951219	283.094	7.853	C10029	Phenylpropanoids and polyketides	Flavonoids	O-methylated flavonoids	C17H14O4	JRFZSUMZAUHNSL-UHFFFAOYSA-N	COC1=CC(=C2C(=O)C=C(OC2=C1)C3=CC=CC=C3)OC	35557.3	61953.8	26230.6	56856.2	41812.1	27730.9
POS_14781	[M+Na]+	6-(beta-D-Glucopyranosyloxy)-4,5,6,7,8,8a-hexahydro-5-hydroxy-5-(1-hydroxy-1-methylethyl)-3,8-dimethyl-2(1H)-azulenone	0.0830847	0.928658	0.75239	453.207	6.274		Lipids and lipid-like molecules	Prenol lipids	Terpene glycosides	C21H34O9	HVAVGMDRUJHUOH-UURFWDJCSA-N	CC1CC(O[C@@H]2O[C@H](CO)[C@@H](O)[C@H](O)[C@H]2O)C(O)(CC3=C(C)C(=O)CC13)C(C)(C)O	6565.68	10091.4	6850.79	8923.61	5848.55	10541.6
POS_15972	[M+K]+	6-[(4E,6E)-2,3-Dihydroxy-4,6-dimethyl-7-(2,4,5-trimethyl-3,6-dioxabicyclo[3.1.0]hexan-2-yl)hepta-4,6-dien-2-yl]-4-methoxy-3,5-dimethylpyran-2-one	0.0826211	1.26824	0.657964	473.182	4.289		Lipids and lipid-like molecules	Fatty Acyls	Fatty alcohols	C24H34O7	UXTZIHZDUIRZDY-JASOSIDASA-N	COC1=C(C)C(=O)OC(=C1C)C(C)(O)C(O)\\C(C)=C\\C(C)=C\\C2(C)OC(C)C3(C)OC23	8725.32	3525.11	2813.46	3029.21	6368.21	2480.39
POS_17148	[M+Na]+	6-[2-Hydroxy-3-methyl-3-[(2S,3R,4S,5S,6R)-3,4,5-trihydroxy-6-(hydroxymethyl)oxan-2-yl]oxybutyl]-5,7-dimethoxychromen-2-one	0.101776	0.875956	0.704886	493.166	5.712		Lipids and lipid-like molecules	Fatty Acyls	Fatty acyl glycosides	C22H30O11	YVMUBJPWZKUGBC-NUTNSJPXSA-N	COC1=C(CC(O)C(C)(C)OC2OC(CO)C(O)C(O)C2O)C(=C3C=CC(=O)OC3=C1)OC	3163.79	9687.07	6070.4	8480.84	8153.91	4965.93
POS_12460	[M-H2O+H]+	6-[3-[(3,4-Dimethoxyphenyl)methyl]-4-methoxy-2-(methoxymethyl)butyl]-4-methoxy-1,3-benzodioxole	2.35376	1.08136	0.689146	415.212	8.23		Lignans, neolignans and related compounds	Dibenzylbutane lignans		C24H32O7	RCFGIEPQSDGMJJ-UHFFFAOYSA-N	COCC(CC1=CC=C(OC)C(=C1)OC)C(COC)CC2=CC(=C3OCOC3=C2)OC	8.75168e+06	1.24989e+07	8.28575e+06	1.12662e+07	8.24981e+06	7.79814e+06
POS_11480	[M+H]+	6-{9a,11a-dimethyl-1H,2H,3H,3aH,3bH,4H,8H,9H,9bH,10H,11H-cyclopenta[a]phenanthren-1-yl}-3-ethyl-2-methylheptane	0.796886	1.07901	0.667987	397.381	12.765					C29H48	ICCTZARHLGPHMT-AVTHQIONNA-N	C1=CCCC2(C1=CCC3C2CCC4(C)C(CCC34)C(C)CCC(CC)C(C)C)C	4.10211e+06	3.55247e+06	5.10979e+06	4.67363e+06	4.16075e+06	2.99529e+06
POS_26277	[M+Na]+	6-Hydroxy-3-[3-hydroxy-4-[3,4,5-trihydroxy-6-[[3,4,5-trihydroxy-6-(hydroxymethyl)oxan-2-yl]oxymethyl]oxan-2-yl]oxyphenyl]-5,7-dimethoxychromen-4-one	0.089473	0.512719	0.502284	677.17	6.089		Phenylpropanoids and polyketides	Isoflavonoids	Isoflavonoid O-glycosides	C29H34O17	KHCREUNEQGORAM-UHFFFAOYSA-N	COC1=C(O)C(=C2C(=O)C(=COC2=C1)C3=CC(=C(OC4OC(COC5OC(CO)C(O)C(O)C5O)C(O)C(O)C4O)C=C3)O)OC	109.171	4112.76	684.727	1987.11	6546.84	1035.94
POS_961	[M+H]+	6-Hydroxyquinoline	0.268288	1.7693	0.589686	146.062	9.251		Organoheterocyclic compounds	Quinolines and derivatives	Hydroxyquinolines	C9H7NO	OVYWMEWYEJLIER-UHFFFAOYSA-N	OC1=CC2=CC=CN=C2C=C1	137.308	29541.5	34022.4	35304.2	394.251	305.163
POS_2655	[M+H]+	6-Methoxy-2,3,4,9-tetrahydro-1H-pyrido[3,4-b]indole	0.8744	0.923127	0.943628	203.118	2.278		Organoheterocyclic compounds	Indoles and derivatives	Pyridoindoles	C12H14N2O	QYMDEOQLJUUNOF-UHFFFAOYSA-N	COC1=CC2=C([NH]C3=C2CCNC3)C=C1	647019	9602.52	5628.51	9710.37	411005	296683
POS_1362	[M+H]+	6-methoxyquinoline	1.04642	0.968672	0.898391	160.075	2.068					C10H9NO	HFDLDPJYCIEXJP-UHFFFAOYSA-N	COC1=CC=C2C(=C1)C=CC=N2	2.5392e+06	3.29573e+06	2.30061e+06	2.21655e+06	3.9412e+06	2.2409e+06
POS_1372	[M+H]+	6-Methylcoumarin	0.376099	0.611551	0.309694	161.06	4.186		Phenylpropanoids and polyketides	Coumarins and derivatives		C10H8O2	FXFYOPQLGGEACP-UHFFFAOYSA-N	CC1=CC2=C(OC(=O)C=C2)C=C1	5865.2	45203.2	17394.7	29409.3	44537.7	38002.8
POS_3961	[M+H]+	6-Methylflavone	0.155128	0.47469	0.0474372	237.095	1.237		Phenylpropanoids and polyketides	Flavonoids	Flavones	C16H12O2	NOQJBXPAMJLUSS-UHFFFAOYSA-N	CC1=CC2=C(OC(=CC2=O)C3=CC=CC=C3)C=C1	581.748	3337	3663.94	5626.02	5162.76	5185.2
POS_18443	[M+Na]+	6-O-beta-D-glucopyranosyl-1-O-[(2,6,6-trimethyl-1-cyclohexen-1-yl)carbonyl]-beta-D-glucopyranose	0.222591	2.10226	0.141965	515.211	5.796		Organic oxygen compounds	Organooxygen compounds	Carbohydrates and carbohydrate conjugates	C22H36O12	URTXXFGOVQACIC-UHFFFAOYSA-N	CC1=C(C(=O)OC2OC(COC3OC(CO)C(O)C(O)C3O)C(O)C(O)C2O)C(C)(C)CCC1	13129.2	35797.5	37321	16877.7	15719.7	8428.84
POS_11928	[M+Na]+	6,7-Dimethoxy-8-(beta-D-glucopyranosyloxy)-2H-1-benzopyran-2-one	0.13172	0.906432	0.708143	407.095	2.683		Phenylpropanoids and polyketides	Coumarins and derivatives	Coumarin glycosides	C17H20O10	MLOMRDQPPYHSAX-QSDFBURQSA-N	COC1=CC2=C(OC(=O)C=C2)C(=C1OC)OC3OC(CO)C(O)C(O)C3O	37806.7	35736.2	25773.7	30618.4	51686.3	27264
POS_15783	[M+H]+	6a-Acetoxy-17(21)-hopene	0.662652	0.449824	0.262924	469.399	12.268		Lipids and lipid-like molecules	Prenol lipids	Hopanoids	C32H52O2	NLYCXKGVDFJIGS-OOJXIBOZSA-N	CC(C)C1=C2CC[C@]3(C)[C@H](CC[C@@H]4[C@@]5(C)CCCC(C)(C)C5[C@H](C[C@@]34C)OC(C)=O)[C@@]2(C)CC1	292668	9642.36	12555.3	249697	174683	275595
POS_9129	[M+Na]+	6a,7,8-Trihydroxy-3-methyl-3,4,5,6,7,12a-hexahydro-2H-benzo[a]anthracene-1,12-dione	0.111221	1.06931	0.779228	351.125	1.129		Benzenoids	Tetralins		C19H20O5	CRULJZWXPCYLAC-UHFFFAOYSA-N	CC1CC(=O)C2=C(CCC3(O)C(O)C4=C(C=CC=C4O)C(=O)C23)C1	22824.2	41307.8	46926.6	40972.2	33125.4	29762.5
POS_9134	[M+H]+	7-(5,7-Dimethoxy-4-oxochromen-2-yl)-6-hydroxyheptanoic acid	0.27129	0.350583	0.00148671	351.152	3.671		Organoheterocyclic compounds	Benzopyrans	1-benzopyrans	C18H22O7	CRHUZHVITSVUHQ-UHFFFAOYSA-N	COC1=CC(=C2C(=O)C=C(CC(O)CCCCC(O)=O)OC2=C1)OC	4546.69	6672.84	3463.95	14737.2	14562.3	12583.4
POS_21244	[M+H]+	7-[3-[(2R,3R,4R)-3,4-Dihydroxy-4-(hydroxymethyl)oxolan-2-yl]oxy-4,5-dihydroxy-6-(hydroxymethyl)oxan-2-yl]oxy-3-(4-methoxyphenyl)chromen-4-one	0.0580726	1.06039	0.35625	563.182	4.777		Phenylpropanoids and polyketides	Isoflavonoids	Isoflavonoid O-glycosides	C27H30O13	TUUBGLDJKKCMRH-NNNVMGKSSA-N	COC1=CC=C(C=C1)C2=COC3=CC(=CC=C3C2=O)OC4OC(CO)C(O)C(O)C4OC5OCC(O)(CO)C5O	67716.5	60648.5	57755.4	58549.7	61355.2	55615.6
POS_15025	[M+Na]+	7-Hydroxy-2-(4-hydroxyphenyl)-5-[(2S,3R,4S,5S,6R)-3,4,5-trihydroxy-6-(hydroxymethyl)oxan-2-yl]oxy-2,3-dihydrochromen-4-one	0.418216	0.748555	0.232359	457.112	4.441		Phenylpropanoids and polyketides	Flavonoids	Flavonoid glycosides	C21H22O10	MFQIWHVVFBCURA-LKBAIHPRSA-N	OCC1OC(OC2=CC(=CC3=C2C(=O)CC(O3)C4=CC=C(O)C=C4)O)C(O)C(O)C1O	52011.4	68665.5	52448.1	56685.5	100241	74352.7
POS_6027	[M+H]+	7-Hydroxy-2-(4-hydroxyphenyl)-5-methoxy-2,3-dihydro-4h-chromen-4-one	0.285974	0.59832	0.143636	287.089	6.48		Phenylpropanoids and polyketides	Flavonoids	O-methylated flavonoids	C16H14O5	CWZLMWSCLBFCBY-UHFFFAOYSA-N	COC1=CC(=CC2=C1C(=O)CC(O2)C3=CC=C(O)C=C3)O	8918.29	15541.8	18915.2	19677.1	19716.5	33101.6
POS_18046	[M+Na]+	7-Hydroxy-4-[(3Z)-5-hydroxy-3-methyl-3-penten-1-yl]-4a,8,8-trimethyl-3-methylenedecahydro-2-naphthalenyl beta-D-mannopyranoside	0.172608	1.94037	0.0847682	507.284	8.01		Lipids and lipid-like molecules	Prenol lipids	Terpene glycosides	C26H44O8	JECOCDKQCZSANH-RFKAOMIISA-N	CC(CCC1C(=C)C(CC2C(C)(C)C(O)CCC12C)OC3OC(CO)C(O)C(O)C3O)=CCO	12234.7	16734	8560.04	6612.75	8468.16	4260.09
POS_4858	[M+Na]+	7-Hydroxyflavone	0.999572	0.460725	0.254697	261.057	1.196	C11264	Phenylpropanoids and polyketides	Flavonoids	Flavones	C15H10O3	MQGPSCMMNJKMHQ-UHFFFAOYSA-N	OC1=CC2=C(C=C1)C(=O)C=C(O2)C3=CC=CC=C3	8652.47	229605	118466	169565	424162	180540
POS_11682	[M+H]+	7-Ketocholesterol	0.128374	1.06867	0.843479	401.338	12.089		Lipids and lipid-like molecules	Steroids and steroid derivatives	Cholestane steroids	C27H44O2	YIKKMWSQVKJCOP-ABXCMAEBSA-N	CC(C)CCCC(C)C1CCC2C3C(CCC12C)C4(C)CCC(O)CC4=CC3=O	54071	27321.4	20469.5	32520.8	33904.5	28890.9
POS_2212	[M+H]+	7-methoxy-4-methylcoumarin	0.82512	0.856861	0.612913	191.07	6.111		Phenylpropanoids and polyketides	Coumarins and derivatives		C11H10O3	UDFPKNSWSYBIHO-UHFFFAOYSA-N	COC1=CC2=C(C=C1)C(=CC(=O)O2)C	540644	317667	258892	306885	432517	564430
POS_1837	[M+H]+	7-Methoxycoumarin	0.768995	1.83549	0.310141	177.054	3.994	C09268	Phenylpropanoids and polyketides	Coumarins and derivatives		C10H8O3	LIIALPBMIOVAHH-UHFFFAOYSA-N	COC1=CC2=C(C=CC(=O)O2)C=C1	304041	106687	105369	119305	71850.6	90021
POS_20163	[M+H]+	7,7',8,8',11,11',12,12'-Hexahydro-y,y-Carotene	0.402199	0.810778	0.660224	543.488	14.113					C40H62	OVSVTCFNLSGAMM-OUOOUFEBSA-N	C(=CC=C(C)CCC=C(C)CCC=C(C)CCC=C(C)C)C=C(C=CC=C(C)CCC=C(C)CCC=C(C)C)C	184294	250294	11630.7	206579	149490	194289
POS_10410	[M+H]+	7''-ethyl-6-methyl-4'',7''-dihydro-3''H-dispiro[oxane-2,6'-[7,9,12]triazatricyclo[6.3.1.04,12]dodecane-10',2''-oxepin]-8'-en-3-ol	0.467398	0.997409	0.981206	376.258	7.314					C21H33N3O3	PVERDUFTDYLFAY-WXWVCVOLNA-N	OC1CCC(OC21NC3=NC4(OC(C=CCC4)CC)CC5N3C(CC5)C2)C	518017	530293	395676	474308	443413	530015
POS_13014	[M+H]+	7(S)-Chloro-7-deoxylincomycin	0.190503	0.685196	0.137817	425.179	4.293	C06914	Organic acids and derivatives	Carboxylic acids and derivatives	Amino acids, peptides, and analogues	C18H33ClN2O5S	KDLRVYVGXIQJDK-NOWPCOIGSA-N	CCC[C@@H]1C[C@H](N(C)C1)C(=O)NC(C(C)Cl)[C@H]2O[C@H](SC)[C@H](O)[C@@H](O)[C@H]2O	14971.5	15388.1	10065.5	23065.5	21982.2	13950.3
POS_12997	[M+K]+	8-(2,3-Dihydroxy-3-methylbutyl)-5,7-dimethoxy-2-phenyl-2,3-dihydrochromen-4-one	0.297707	0.459312	0.368211	425.133	7.141		Phenylpropanoids and polyketides	Flavonoids	Flavans	C22H26O6	SDEUJZQQWGXEEM-UHFFFAOYSA-N	COC1=CC(=C2C(=O)CC(OC2=C1CC(O)C(C)(C)O)C3=CC=CC=C3)OC	503.982	11065.5	21350	15680.9	9876.68	46113.8
POS_8129	[M+Na]+	8-(3-Methoxy-2-(methoxycarbonyl)phenyl)octanoic acid	1.17936	0.395317	0.107812	331.153	4.571		Benzenoids	Benzene and substituted derivatives	Benzoic acids and derivatives	C17H24O5	RTUJIYBESVJPOD-UHFFFAOYSA-N	COC(=O)C1=C(OC)C=CC=C1CCCCCCCC(O)=O	3425.2	148725	191677	292299	179730	397719
POS_6299	[M+H]+	8-[3-Oxo-2-[(E)-pent-2-enyl]cyclopenten-1-yl]octanoic acid	0.565787	0.804051	0.546758	293.208	9.293		Lipids and lipid-like molecules	Fatty Acyls	Fatty acids and conjugates	C18H28O3	RHVWQVSLVMXMBR-XVNBXDOJSA-N	CCC=CCC1=C(CCCCCCCC(O)=O)CCC1=O	75747.8	209453	146366	188479	110997	237265
POS_9081	[M+H]+	8-[5-(Acetyloxy)-3-methylpentyl]octahydro-4,4,8a-trimethyl-7-methylene-2(1H)-naphthalenone	0.277346	0.798348	0.326763	349.271	11.157		Lipids and lipid-like molecules	Prenol lipids	Diterpenoids	C22H36O3	LZGVQJDYLAUCGI-UHFFFAOYSA-N	CC(CCOC(C)=O)CCC1C(=C)CCC2C(C)(C)CC(=O)CC12C	29701.5	39428.7	19784.5	30579	42902.1	37892.1
POS_11532	[M+Na]+	8-Hydroxy-2,7,7,11,15-pentamethyl-5,12,16-trioxapentacyclo[9.8.0.0(2),.0,.0(1)(3),(1)]nonadec-13(18)-ene-3,17-dione	0.221762	0.692868	0.409547	399.161	4.771		Organoheterocyclic compounds	Naphthopyrans		C21H28O6	OYBHLUBLZHVTKK-UHFFFAOYSA-N	CC1CC2=C(CC3C(C)(CCC4(O)C(C)(C)C5OC5C(=O)C34C)O2)C(=O)O1	3878.11	21799.4	9005.86	18548.5	18047.5	13461.6
POS_4897	[M-3H2O+H]+	8-Hydroxy-9,10-epoxystearic acid	0.0981174	1.1287	0.815294	261.217	9.237		Lipids and lipid-like molecules	Fatty Acyls	Lineolic acids and derivatives	C18H34O4	GQEOLYBERRZZCE-UHFFFAOYSA-N	CCCCCCCCC1OC1C(O)CCCCCCC(O)=O	22091.8	14193.7	5317.46	7660.63	20436	8762.65
POS_21035	[M+Na]+	8-Hydroxypinoresinol 4'-glucoside	0.107458	0.926104	0.632234	559.177	4.746		Lignans, neolignans and related compounds	Lignan glycosides		C26H32O12	GQLQVPZSTWXDBQ-ZOKOZUFBSA-N	COC1=CC(=CC=C1O)C2OCC3C(OCC23O)C4=CC=C(OC5OC(CO)C(O)C(O)C5O)C(=C4)OC	13443.3	10956.6	8260.17	10232.8	12487	12546.3
POS_8659	[M+H]+	8-Prenylnaringenin	0.272587	0.754199	0.190767	341.135	5.763		Phenylpropanoids and polyketides	Flavonoids	Flavans	C20H20O5	LPEPZZAVFJPLNZ-SFHVURJKSA-N	CC(C)=CCC1=C(O)C=C(O)C2=C1O[C@@H](CC2=O)C3=CC=C(O)C=C3	35500	36669.4	20680.8	39358.1	48339.6	35413.4
POS_16516	[M+Na]+	8‐[(3‐fluorophenyl)methyl]‐3‐[(3‐phenoxyphenyl)methyl]‐1,3,8‐triazaspiro[4.5]decane‐2,4‐dione	0.0230578	0.825788	0.839639	482.185	1.633		Organoheterocyclic compounds	Piperidines	Benzylpiperidines	C27H26FN3O3	TUUIZIZBYGQMSF-UHFFFAOYSA-N	FC1=CC=CC(=C1)CN2CCC3(CC2)NC(=O)N(CC4=CC(=CC=C4)OC5=CC=CC=C5)C3=O	14.3288	497.657	12.5174	322.591	142.569	169.996
POS_6854	[M+H]+	8,8-Dimethyl-2-phenyl-4H,8H-benzo[1,2-b:3,4-b']dipyran-4-one	0.0377498	1.07709	0.475932	305.119	2.239		Phenylpropanoids and polyketides	Flavonoids	Pyranoflavonoids	C20H16O3	RBKWJAHRWPDNPM-UHFFFAOYSA-N	CC1(C)OC2=CC=C3C(=O)C=C(OC3=C2C=C1)C4=CC=CC=C4	12814.1	16273.6	13244.7	11750.2	13592.8	13959.4
POS_2950	[M-H2O+H]+	9-Epiblumenol B	0.0781327	1.10556	0.499608	209.153	4.015		Lipids and lipid-like molecules	Prenol lipids	Sesquiterpenoids	C13H22O3	CWOFGGNDZOPNFG-UHFFFAOYSA-N	CC(O)CCC1(O)C(=CC(=O)CC1(C)C)C	451550	494767	321354	397485	350904	398245
POS_1972	[M+H]+	9-Fluorenone	0.12133	1.17323	0.519255	181.062	7.234		Benzenoids	Fluorenes		C13H8O	YLQWCDOCJODRMT-UHFFFAOYSA-N	O=C1C2=C(C=CC=C2)C3=C1C=CC=C3	53731.4	48419.7	25436.3	39676.7	32956.8	36115.2
POS_8434	[M+H]+	9-Methoxy-4,4-dimethyl-13-phenyl-6,14-dioxatetracyclo[8.4.0.02,7.03,5]tetradeca-1,7,9-trien-11-one	0.382759	0.812911	0.695864	337.138	8.393		Phenylpropanoids and polyketides	Flavonoids	Pyranoflavonoids	C21H20O4	NGRRXMZEVSBATO-UHFFFAOYSA-N	COC1=C2C(=O)CC(OC2=C3C4C(OC3=C1)C4(C)C)C5=CC=CC=C5	4994.42	110822	151130	122359	66943.7	139080
POS_6305	[M+H]+	9s,13r-12-Oxophytodienoic Acid	0.715818	0.781151	0.160163	293.21	9.395		Lipids and lipid-like molecules	Fatty Acyls	Eicosanoids	C18H28O3	PMTMAFAPLCGXGK-TTXFDSJOSA-N	CC\\C=C/C[C@@H]1[C@@H](CCCCCCCC(O)=O)C=CC1=O	127086	211668	143843	200284	203757	213761
POS_8452	[M+H]+	Acebutolol	0.0878077	1.30546	0.432903	337.211	12.106		Organic oxygen compounds	Organooxygen compounds	Carbonyl compounds	C18H28N2O4	GOEMGAFJFRBGGG-UHFFFAOYSA-N	CCCC(=O)NC1=CC(=C(OCC(O)CNC(C)C)C=C1)C(C)=O	58017	79353.9	84697.1	44418.3	33283.5	92405
POS_1184	[M]+	Acenaphthylene	0.0823315	1.13738	0.0178226	152.06	8.492		Benzenoids	Acenaphthylenes		C12H8	HXGDTGSAIMULJN-UHFFFAOYSA-N	C1=CC2=CC=CC3=C2C(=C1)C=C3	54056.4	54627.5	55764.5	49704.7	49943.3	44937.3
POS_1188	[M+H]+	Acetaminophen	0.725779	3.72534	0.0650857	152.069	1.846	C06804	Benzenoids	Phenols	1-hydroxy-2-unsubstituted benzenoids	C8H9NO2	RZVAJINKPMORJF-UHFFFAOYSA-N	CC(O)=NC1=CC=C(O)C=C1	105218	313301	211823	36709.8	63123.7	69370.7
POS_3455	[M+H]+	Acetamiprid	0.149722	0.648728	0.186585	223.075	4.479		Organoheterocyclic compounds	Imidazopyrimidines	Purines and purine derivatives	C10H11ClN4	WCXDHFDTOYPNIE-RIYZIHGNSA-N	CN(CC1=CN=C(Cl)C=C1)C(C)=NC#N	2130.82	6707.46	4281.09	8094.25	6207.73	5921.24
POS_368	[M+Li]+	Acetophenone	0.292482	0.632589	0.249612	121.063	5.178					C8H8O	KWOLFJPFCHCOCG-UHFFFAOYSA-N	CC(=O)C1=CC=CC=C1	19942.8	19142.2	12056.9	14215.4	38001.7	28628.3
POS_6687	[M+H]+	Adrenosterone	0.440645	0.98806	0.956139	301.178	9.356	C05285	Lipids and lipid-like molecules	Steroids and steroid derivatives	Androstane steroids	C19H24O3	RZRPTBIGEANTGU-IRIMSJTPSA-N	CC12CC(=O)C3C(CCC4=CC(=O)CCC34C)C1CCC2=O	519615	707327	721357	737918	426224	807701
POS_19586	[M+H]+	Aerucyclamide A	0.112176	1.26458	0.622853	535.213	5.207		Organic acids and derivatives	Carboxylic acids and derivatives	Amino acids, peptides, and analogues	C24H34N6O4S2	VJFRQMMMXJJUSM-VZGZUROSSA-N	CC[C@H](C)[C@@H]1NC(=O)[C@H]2CSC(=N2)[C@H](NC(=O)C3=CSC(=N3)CNC(=O)[C@H]4N=C1O[C@@H]4C)[C@@H](C)CC	22605.2	74563	29132.3	34810.4	28128.9	36936.5
POS_9214	[M+Na]+	Aflatoxin G2	0.0943596	0.508066	0.129016	353.061	2.238		Phenylpropanoids and polyketides	Coumarins and derivatives	Furanocoumarins	C17H14O7	WPCVRWVBBXIRMA-WNWIJWBNSA-N	COC1=C2C3=C(C(=O)OCC3)C(=O)OC2=C4[C@@H]5CCO[C@@H]5OC4=C1	55.858	1643.28	1135.69	1676.54	1866.49	2036.59
POS_11530	[M+Na]+	Ailanthone	0.738875	0.189875	0.194014	399.14	4.413		Lipids and lipid-like molecules	Prenol lipids	Terpene lactones		WBBVXGHSWZIJST-RLQYZCPESA-N	CC1=CC(=O)[C@@H](O)[C@@]2(C)[C@H]1C[C@H]3OC(=O)C[C@H]4C(=C)[C@@H](O)[C@]5(O)OC[C@]34[C@@H]25	2294.11	40697.7	11053.9	22040.1	185232	77366.6
POS_9255	[M+H]+	Ajmalicine	0.0766125	0.657809	0.326209	353.19	4.36		Alkaloids and derivatives	Yohimbine alkaloids		C21H24N2O3	GRTOGORTSDXSFK-XJTZBENFSA-N	COC(=O)C1=COC(C)C2CN3CCC4=C([NH]C5=CC=CC=C45)C3CC12	848.124	2501.11	1561.49	2111.79	3649.78	1703.7
POS_10119	[M+H]+	Ajugol	0.352485	0.56928	0.0794573	371.125	6.5					C15H24O9	VELYAQRXBJLJAK-XKKWFBPMSA-N	C[C@@]1(C[C@H]([C@H]2[C@@H]1[C@@H](OC=C2)O[C@H]3[C@@H]([C@H]([C@@H]([C@H](O3)CO)O)O)O)O)O	28164.9	13329.2	44028.7	47528.6	47540.9	55160.1
POS_10242	[M+H]+	Alantrypinone	0.142189	1.08507	0.802799	373.125	6.193		Organoheterocyclic compounds	Pyridopyrimidines		C21H16N4O3	COXWNIZQNAMTQL-NQERJWCQSA-N	C[C@@]12NC(=O)[C@@H](C[C@]13C(=O)NC4=CC=CC=C34)N5C(=O)C6=CC=CC=C6N=C25	37724.9	79441.2	42188	34588	48965	63307.3
POS_17716	[M+Na]+	Albiflorin	0.0264171	1.55409	0.279015	503.149	5.306		Lipids and lipid-like molecules	Prenol lipids	Terpene glycosides	C23H28O11	QQUHMASGPODSIW-ICECTASOSA-N	C[C@]12C[C@@H](O)[C@@H]3C[C@@]1(O[C@@H]4O[C@H](CO)[C@@H](O)[C@H](O)[C@H]4O)[C@]3(COC(=O)C5=CC=CC=C5)C(=O)O2	1378.68	2134.29	891.849	666.836	809.495	1358
POS_6983	[M+NH4]+	Albiflorin-3	0.124049	1.16725	0.675958	308.147	5.832		Phenylpropanoids and polyketides	Coumarins and derivatives		C16H18O5	DBPWCIPDCMVUFT-UHFFFAOYSA-N	COC(C(O)C(C)=C)C1=C(OC)C=CC2=C1OC(=O)C=C2	26726.8	71502	35269.9	41345.6	31111.8	41912.8
POS_17289	[M+Na]+	Alisol B	0.610212	0.620842	0.333298	495.338	9.727		Lipids and lipid-like molecules	Prenol lipids	Triterpenoids		GBJKHDVRXAVITG-DXYWBWDESA-N	C[C@H](CC(O)C1OC1(C)C)C2=C3C[C@H](O)[C@H]4[C@@]5(C)CCC(=O)C(C)(C)C5CC[C@]4(C)[C@@]3(C)CC2	23564.5	139429	88098.4	111955	198414	94069.6
POS_13305	[M+H]+	All-rac-3,4-Dehydro-alpha-tocopherol	0.521822	0.639809	0.248317	429.372	13.545					C29H48O2	JDRGHECKJUSWSU-UHFFFAOYNA-N	OC=1C(=C2C=CC(OC2=C(C1C)C)(C)CCCC(C)CCCC(C)CCCC(C)C)C	56130.6	86741.1	28983.6	79502.3	66244.8	122857
POS_15081	[M+H]+	alpha-Boswellic acid	0.975455	0.562381	0.204899	457.362	9.5		Lipids and lipid-like molecules	Prenol lipids	Triterpenoids	C30H48O3	BZXULBWGROURAF-IKNLXHIFSA-N	CC1(C)CC[C@]2(C)CC[C@]3(C)C(=CC[C@@H]4[C@@]5(C)CC[C@@H](O)[C@@](C)([C@@H]5CC[C@@]34C)C(O)=O)[C@@H]2C1	17065.2	233278	139698	197541	276513	219500
POS_14517	[M+Na]+	alpha-D-Glucopyranoside, alpha-D-glucopyranosyl, 3-(2-methylbutanoate)	0.0316868	1.56739	0.461995	449.16	2.106		Lipids and lipid-like molecules	Saccharolipids		C17H30O12	SFAOCCXTEHOWEV-AGJOLMTFSA-N	CCC(C)C(=O)O[C@H]1[C@H](O)[C@@H](CO)O[C@H](O[C@H]2O[C@H](CO)[C@@H](O)[C@H](O)[C@H]2O)[C@@H]1O	327.811	1180.37	468.715	677.363	282.477	301.432
POS_5331	[M+H]+	alpha-Naphthoflavone	0.0862845	0.977777	0.905182	273.093	1.306		Phenylpropanoids and polyketides	Flavonoids	Flavones	C19H12O2	VFMMPHCGEFXGIP-UHFFFAOYSA-N	O=C1C=C(OC2=C1C=CC3=CC=CC=C23)C4=CC=CC=C4	11884.1	15609.9	8556	13668	11427.9	11773.4
POS_11371	[M+H-H2O]+	alpha-Spinasterol	0.800666	1.49106	0.500943	395.366	11.971		Lipids and lipid-like molecules	Steroids and steroid derivatives	Stigmastanes and derivatives		JZVFJDZBLUFKCA-FXIAWGAOSA-N	CC[C@H](\\C=C\\[C@@H](C)[C@H]1CC[C@H]2C3=CC[C@H]4C[C@@H](O)CC[C@]4(C)[C@H]3CC[C@]12C)C(C)C	589877	287895	106311	143055	261723	255209
POS_3716	[M+H]+	alpha,beta-Dihydroresveratrol	0.64358	0.738501	0.445595	231.102	9.316	C10255	Phenylpropanoids and polyketides	Stilbenes		C14H14O3	HITJFUSPLYBJPE-UHFFFAOYSA-N	OC1=CC=C(CCC2=CC(=CC(=C2)O)O)C=C1	256279	118851	98430.9	156846	184561	299840
POS_13523	[M+Na]+	Alternaric acid	0.255915	0.787294	0.399549	433.182	5.572		Lipids and lipid-like molecules	Prenol lipids	Terpene lactones	C21H30O8	OFVHHCDOMZQVQV-ZICDYRIUSA-N	CC[C@H](C)[C@@H](O)[C@@](O)(\\C=C\\CC(=C)CCC(=O)C1C(=O)C[C@@H](C)OC1=O)C(O)=O	99874.3	52078.7	40412.9	82972.2	85189.8	76176.1
POS_14901	[M+H]+	Amethopterin	0.405359	0.517687	0.236524	455.168	5.253	C00855	Organoheterocyclic compounds	Pteridines and derivatives	Pterins and derivatives	C20H22N8O5	FBOZXECLQNJBKD-UHFFFAOYSA-N	CN(CC1=NC2=C(N)N=C(N)N=C2N=C1)C3=CC=C(C=C3)C(=O)NC(CCC(O)=O)C(O)=O	3860.78	44494.1	28988.7	50766.5	71065.9	27569.8
POS_9264	[M+H]+	Anileridine	0.128106	0.928263	0.748777	353.227	8.262		Organoheterocyclic compounds	Piperidines	Phenylpiperidines	C22H28N2O2	LKYQLAWMNBFNJT-UHFFFAOYSA-N	CCOC(=O)C1(CCN(CCC2=CC=C(N)C=C2)CC1)C3=CC=CC=C3	9578.03	16049.4	13220.8	10001.9	14107.1	17741.5
POS_22370	[M+H]+	Antheraxanthin	0.349332	0.541106	0.0836174	585.428	11.739		Lipids and lipid-like molecules	Prenol lipids	Tetraterpenoids	C40H56O3	OFNSUWBAQRCHAV-OYQUVCAXSA-N	CC1=C(\\C=C\\C(C)=C\\C=C\\C(C)=C\\C=C\\C=C(C)\\C=C\\C=C(C)\\C=C\\[C@@]23O[C@]2(C)C[C@@H](O)CC3(C)C)C(C)(C)C[C@H](O)C1	15520.2	27793.5	12157.6	32181.6	43511.8	26821.1
POS_1885	[M]+	Anthracene	0.0834693	0.972638	0.613941	178.078	8.491		Benzenoids	Anthracenes		C14H10	MWPLVEDNUUSJAV-UHFFFAOYSA-N	C1=CC2=CC3=C(C=CC=C3)C=C2C=C1	46722	41405.9	43472.6	47835.3	45321.7	42145.6
POS_22462	[M+H]+	Anthranoyllycoctonine	0.0319325	1.13066	0.840124	587.342	7.467		Lipids and lipid-like molecules	Prenol lipids	Diterpenoids	C32H46N2O8	NNDHDYDFEDRMGH-CAEIVAEBSA-N	CCN1C[C@@]2(CC[C@H](OC)[C@@]34[C@@H]5C[C@@H]6[C@H](C[C@@](O)([C@H]5[C@H]6OC)[C@@](O)([C@@H](OC)[C@H]23)C14)OC)COC(=O)C7=CC=CC=C7N	481.448	4736.81	2257.85	1384.45	3161.25	2066.45
POS_10732	[M+H]+	Apo-12'-capsorubinal	0.137305	1.48851	0.467063	383.254	9.979					C25H34O3	MWEPRWWNHJVNMU-YGWWIANTNA-N	O=CC(=CC=CC=C(C=CC=C(C=CC(=O)C1(C)CC(O)CC1(C)C)C)C)C	9379.96	54615.5	32529.6	23428.5	22914.6	18503.5
POS_1781	[M+H]+	Arginine	0.0969232	0.804207	0.793842	175.118	1.126		Organic acids and derivatives	Carboxylic acids and derivatives	Amino acids, peptides, and analogues	C6H14N4O2	ODKSFYDXXFIFQN-UHFFFAOYSA-N	NC(CCCN=C(N)N)C(O)=O	155.046	3688.54	25214.6	5736.09	15256.7	15139.9
POS_9441	[M+Na]+	Arnicolide C	0.870363	0.776751	0.385606	357.166	7.073		Lipids and lipid-like molecules	Prenol lipids	Terpene lactones	C19H26O5	WKUOPGZYLRFCHJ-APDQSUQKSA-N	CC(C)C(=O)OC1C2C(C)C(=O)OC2CC(C)C3C=CC(=O)C13C	167542	398332	365332	436061	288439	474347
POS_3901	[M+H]+	Artemisinic acid	0.200643	1.09347	0.433611	235.167	5.886					C15H22O2	PLQMEXSCSAIXGB-SAXRGWBVSA-N	C[C@@H]1CC[C@H]([C@@H]2[C@H]1CCC(=C2)C)C(=C)C(=O)O	155560	161136	126753	115846	141304	148392
POS_1971	[M+H]+	Aspirin	0.188934	0.643588	0.32094	181.051	3.935	C01405	Benzenoids	Benzene and substituted derivatives	Benzoic acids and derivatives	C9H8O4	BSYNRYMUTXBXSQ-UHFFFAOYSA-N	CC(=O)OC1=C(C=CC=C1)C(O)=O	14210.7	6710.68	4630.2	8886.39	11868.6	18946.8
POS_14009	[M+Na]+	Asteltoxin	0.381901	0.749024	0.455618	441.185	6.249		Organoheterocyclic compounds	Furofurans		C23H30O7	GPXPJKFETRLRAS-AHUKKWBBSA-N	CC[C@H]1O[C@@H]2O[C@H](\\C=C\\C=C\\C=C\\C3=C(C)C(=CC(=O)O3)OC)[C@H](O)[C@]2(C)[C@@]1(C)O	11224.8	70614.2	66051.4	69847.9	53926.2	73670.1
POS_24196	[M+H]+	Asteriaceramide A	0.391756	1.08259	0.70559	626.567	13.18					C38H75NO5	NMJATLITVAZZIR-CHMRVKKNNA-N	O=C(NC(CO)C(O)C(O)CCCCCCCCC=CCCCCCCCC)C(O)CCCCCCCCCCCCCC	831532	857940	1.30949e+06	1.09891e+06	938728	732530
POS_15832	[M+Na]+	Astragalin	0.88407	0.901655	0.52806	471.088	5.267	C12249	Phenylpropanoids and polyketides	Flavonoids	Flavonoid glycosides		JPUKWEQWGBDDQB-QSOFNFLRSA-N	OC[C@H]1O[C@@H](OC2=C(OC3=C(C(=CC(=C3)O)O)C2=O)C4=CC=C(O)C=C4)[C@H](O)[C@@H](O)[C@@H]1O	1.86027e+06	1.46159e+06	1.16619e+06	1.69126e+06	1.85672e+06	1.42959e+06
POS_33313	[M+Na]+	Astragaloside II	0.0910016	0.637281	0.251916	849.463	9.941		Lipids and lipid-like molecules	Steroids and steroid derivatives	Steroidal glycosides		AYWNHWGQTMCQIV-PENCHUSISA-N	CC(=O)O[C@@H]1[C@@H](O)[C@H](O)CO[C@H]1O[C@H]2CC[C@]34C[C@]35CC[C@]6(C)[C@H]([C@@H](O)C[C@@]6(C)[C@@H]5C[C@H](O[C@@H]7O[C@H](CO)[C@@H](O)[C@H](O)[C@H]7O)[C@H]4C2(C)C)[C@@]8(C)CC[C@H](O8)C(C)(C)O	1091.74	2567.2	1267.14	1751.55	3540.17	2438.11
POS_28423	[M+Na]+	Atazanavir	0.0552922	0.969482	0.937073	727.382	8.405		Organic acids and derivatives	Carboxylic acids and derivatives	Amino acids, peptides, and analogues	C38H52N6O7	AXRYRYVKAWYZBR-GASGPIRDSA-N	COC(=O)N[C@H](C(=O)N[C@@H](CC1=CC=CC=C1)[C@@H](O)CN(CC2=CC=C(C=C2)C3=NC=CC=C3)NC(=O)[C@@H](NC(=O)OC)C(C)(C)C)C(C)(C)C	7700.03	13619.5	5223.38	9057.79	12947.8	5372.87
POS_3731	[M+H]+	Atractylenolide I	0.171609	0.976193	0.843679	231.135	12.343					C15H18O2	ZTVSGQPHMUYCRS-SWLSCSKDSA-N	CC1=C2C[C@H]3C(=C)CCC[C@@]3(C=C2OC1=O)C	41869.4	62030.1	54774.4	51724	53405.8	57413.9
POS_3827	[M+H]+	Atractylenolide II	0.879362	0.558858	0.0377787	233.154	6.424					C15H20O2	OQYBLUDOOFOBPO-KCQAQPDRSA-N	CC1=C2C[C@H]3C(=C)CCC[C@@]3(C[C@@H]2OC1=O)C	112747	113968	113069	175653	171242	261102
POS_7132	[M-H2O+H]+	Avocadene 2-acetate	0.053555	1.093	0.845847	311.258	14.058		Lipids and lipid-like molecules	Fatty Acyls	Fatty alcohols	C19H36O4	LUIGTZGBXWZJAX-UHFFFAOYSA-N	CC(=O)OC(CO)CC(O)CCCCCCCCCCCC=C	28489.8	22132.7	71455.2	40339.4	46126.8	25224.1
POS_11792	[M+H]+	Azoxystrobin	0.162745	0.819214	0.852498	404.123	6.902		Benzenoids	Benzene and substituted derivatives	Phenyl-beta-methoxyacrylates	C22H17N3O5	WFDXOXNFNRHQEC-GHRIWEEISA-N	CO\\C=C(C(=O)OC)/C1=CC=CC=C1OC2=NC=NC(=C2)OC3=CC=CC=C3C#N	647.124	8787.65	6837.38	17635.1	576.658	1651.42
POS_12639	[M+H]+	Barbaloin	0.403173	0.779487	0.328291	419.132	4.401		Benzenoids	Anthracenes		C21H22O9	AFHJQYHRLPMKHU-OSYMLPPYSA-N	OCC1OC(C(O)C(O)C1O)C2C3=C(C(=CC=C3)O)C(=O)C4=C2C=C(CO)C=C4O	164708	107160	69504.4	152147	129312	156485
POS_8542	[M+H]+	Bavachinin	0.912482	1.17982	0.463268	339.155	9.84		Phenylpropanoids and polyketides	Flavonoids	Flavans	C21H22O4	VOCGSQHKPZSIKB-FQEVSTJZSA-N	COC1=C(CC=C(C)C)C=C2C(=O)CC(OC2=C1)C3=CC=C(O)C=C3	3.44984e+06	3.13316e+06	4.1669e+06	3.75793e+06	1.84432e+06	3.50923e+06
POS_186	[M+H]+	Benzaldehyde	0.230932	1.87766	0.460126	107.048	1.496	C00261	Benzenoids	Benzene and substituted derivatives	Benzoyl derivatives	C7H6O	HUMNYLRZRPPJDN-UHFFFAOYSA-N	O=CC1=CC=CC=C1	7605.43	52624.9	18269.9	26563.3	8232.54	7011.64
POS_2896	[M]+	Benzoylcholine	0.775874	2.75983	0.534703	208.134	2.454		Benzenoids	Benzene and substituted derivatives	Benzoic acids and derivatives	[C12H18NO2]+	HOPVGFKDVOOCHD-UHFFFAOYSA-N	C[N+](C)(C)CCOC(=O)C1=CC=CC=C1	336033	2429.38	15646.3	4733	49504.3	74070.8
POS_22427	[M+Na]+	Benzyl 2-O-(D-apio-beta-D-furanosyl)-3-O-(beta-D-glucopyranosyl)-beta-D-glucopyranoside	0.0423733	1.00342	0.995489	587.195	3.451		Organic oxygen compounds	Organooxygen compounds	Carbohydrates and carbohydrate conjugates	C24H36O15	XRUAMQHLDNCEHM-IEMCRNCHSA-N	OC[C@H]1O[C@@H](O[C@H]2[C@H](O)[C@@H](CO)O[C@@H](OCC3=CC=CC=C3)[C@@H]2O[C@@H]4OC[C@](O)(CO)[C@H]4O)[C@H](O)[C@@H](O)[C@@H]1O	1931.93	3977.17	628.291	821.196	3439.69	2254.24
POS_22428	[M+Na]+	Benzyl 2-O-beta-D-glucopyranosyl-6-O-beta-D-xylopyranosyl-beta-D-glucopyranoside	0.0552529	1.51807	0.557585	587.198	3.784		Organic oxygen compounds	Organooxygen compounds	Carbohydrates and carbohydrate conjugates	C24H36O15	RNYROHPATJSIAO-LGLSMWBYSA-N	OC[C@H]1O[C@@H](O[C@@H]2[C@@H](O)[C@H](O)[C@@H](CO[C@@H]3OC[C@@H](O)[C@H](O)[C@H]3O)O[C@H]2OCC4=CC=CC=C4)[C@H](O)[C@@H](O)[C@@H]1O	1216.54	8882.23	3094.71	3276.01	3399.04	2015.88
POS_7212	[M+H]+	Benzyl butyl phthalate	0.268255	0.843363	0.693705	313.142	9.292		Benzenoids	Benzene and substituted derivatives	Benzoic acids and derivatives	C19H20O4	IRIAEXORFWYRCZ-UHFFFAOYSA-N	CCCCOC(=O)C1=CC=CC=C1C(=O)OCC2=CC=CC=C2	53746.2	20387.5	21440.5	20613.8	44093.5	48617.8
POS_14898	[M+Na]+	Benzyl gentiobioside	0.285486	1.09726	0.791103	455.152	3.681		Organic oxygen compounds	Organooxygen compounds	Carbohydrates and carbohydrate conjugates	C19H28O11	LLEMMFPELBNINR-SKYGPZSASA-N	OC[C@H]1O[C@@H](OC[C@H]2O[C@@H](OCC3=CC=CC=C3)[C@H](O)[C@@H](O)[C@@H]2O)[C@H](O)[C@@H](O)[C@@H]1O	192123	125706	61304	93344	133787	118394
POS_13185	[M+H]+	beta-Amyrin	0.406568	0.87481	0.735307	427.387	13.019	C08616	Lipids and lipid-like molecules	Prenol lipids	Triterpenoids	C30H50O	JFSHUTJDVKUMTJ-QHPUVITPSA-N	CC1(C)CC[C@]2(C)CC[C@]3(C)C(=CC[C@@H]4[C@@]5(C)CC[C@H](O)C(C)(C)[C@@H]5CC[C@@]34C)[C@@H]2C1	38108.4	160322	139235	86015.8	167030	132941
POS_305	[M+H]+	Betaine	0.644775	0.758883	0.556843	118.085	4.201		Organic acids and derivatives	Carboxylic acids and derivatives	Amino acids, peptides, and analogues	C5H11NO2	KWIUHFFTVRNATP-UHFFFAOYSA-N	C[N+](C)(C)CC([O-])=O	158965	77469.5	200766	68183.9	269911	238016
POS_14185	[M+H]+	Betulin	1.41544	0.891153	0.686378	443.386	12.447	C08618	Lipids and lipid-like molecules	Prenol lipids	Triterpenoids	C30H50O2	FVWJYYTZTCVBKE-ROUWMTJPSA-N	CC(=C)C1CCC2(CO)CCC3(C)C(CCC4C5(C)CCC(O)C(C)(C)C5CCC34C)C12	963398	2.04403e+06	1.34553e+06	1.21697e+06	2.10239e+06	1.56527e+06
POS_9069	[M+H]+	Bexarotene	0.112926	0.871114	0.777632	349.211	9.474		Lipids and lipid-like molecules	Prenol lipids	Retinoids	C24H28O2	NAVMQTYZDKMPEU-UHFFFAOYSA-N	CC1=CC2=C(C=C1C(=C)C3=CC=C(C=C3)C(O)=O)C(C)(C)CCC2(C)C	1462.56	15652.8	16206.2	10722.5	17745.7	9783.57
POS_13384	[M+Na]+	Bidwillon A	0.380921	2.45397	0.346279	431.182	5.06		Phenylpropanoids and polyketides	Isoflavonoids	Isoflavans	C25H28O5	QUBRRXBPXPHDJO-UHFFFAOYSA-N	CC(C)=CCC1=CC2=C(OCC(C2=O)C3=CC=C(O)C=C3O)C(=C1O)CC=C(C)C	61165.5	77098.2	4271.62	48210.7	4721.56	5151.4
POS_19526	[M+H]+	Biochanin A 7-O-beta-d-glucoside-6''-O-malonate	0.343088	0.84587	0.718034	533.409	11.908	C12625	Phenylpropanoids and polyketides	Isoflavonoids	Isoflavonoid O-glycosides	C25H24O13	VRCBYTZZZFFKEN-RBZNUJCTSA-N	COC1=CC=C(C=C1)C2=COC3=CC(=CC(=C3C2=O)O)OC4OC(COC(=O)CC(O)=O)C(O)C(O)C4O	7360.91	107142	96176.9	79412.1	101121	68536.6
POS_4266	[M+H]+	Biotin	0.555347	0.643569	0.34026	245.098	2.316	C00120	Organoheterocyclic compounds	Biotin and derivatives		C10H16N2O3S	YBJHBAHKTGYVGT-ZKWXMUAHSA-N	OC(=O)CCCCC1SCC2N=C(O)NC12	422990	1300.03	346343	442532	372103	382801
POS_9504	[M+NH4]+	Bisphenol A diglycidyl ether	0.944476	0.425633	0.0356915	358.2	8.426	C14348	Benzenoids	Benzene and substituted derivatives	Diphenylmethanes	C21H24O4	LCFVJGUPQDGYKZ-UHFFFAOYSA-N	CC(C)(C1=CC=C(OCC2CO2)C=C1)C3=CC=C(OCC4CO4)C=C3	104207	69516.8	81882.6	176529	154054	269950
POS_13503	[M+Na]+	Bruceine D	0.263221	0.737164	0.49413	433.143	4.536		Lipids and lipid-like molecules	Prenol lipids	Terpene lactones		JBDMZGKDLMGOFR-DFEKUIMESA-N	CC1=CC(=O)[C@@H](O)[C@@]2(C)[C@H]1C[C@H]3OC(=O)[C@H](O)[C@@]4(O)[C@@]5(C)OC[C@]34[C@@H]2[C@@H](O)[C@@H]5O	4165.82	31971.8	22805.4	17807.7	32177.2	29974.2
POS_11330	[M+H]+	Brucine	0.311808	0.496993	0.126165	395.201	6.631		Alkaloids and derivatives	Strychnos alkaloids		C23H26N2O4	RRKTZKIUPZVBMF-UHFFFAOYSA-N	COC1=C(OC)C=C2C(=C1)N3C4C5C(CC3=O)OCC=C6CN7CCC24C7CC56	6628.01	16211.7	26481.7	35512.9	42841.9	20885
POS_17133	[M+NH4]+	Bryodulcosigenin	6.2844	1.02026	0.855664	492.403	11.53		Lipids and lipid-like molecules	Steroids and steroid derivatives	Cucurbitacins		FPMQKXQOBKDVHF-ZGUWQJCPSA-N	C[C@H](CCC(O)C(C)(C)O)[C@H]1CC[C@@]2(C)[C@@H]3CC=C4[C@@H](CC[C@H](O)C4(C)C)[C@]3(C)C(=O)C[C@]12C	9.27658e+07	7.80555e+07	6.96822e+07	6.97504e+07	8.03175e+07	8.56597e+07
POS_6891	[M+H]+	Buprofezin_C16H23N3OS_(2Z)-2-(tert-Butylimino)-3-(1-methylethyl)-5-phenyl-1,3,5-thiadiazinan-4-one	0.13156	1.63273	0.526516	306.162	9.756		Organoheterocyclic compounds	Thiadiazinanes		C16H23N3OS	PRLVTUNWOQKEAI-VKAVYKQESA-N	CC(C)N1C(=O)N(CSC1=NC(C)(C)C)C2=CC=CC=C2	277.667	16064.6	12284.3	10665.2	3161.05	3706.64
POS_3407	[M+H]+	Butylated hydroxytoluene	0.145434	1.07419	0.811839	221.189	5.099	C14693	Benzenoids	Benzene and substituted derivatives	Phenylpropanes	C15H24O	NLZUEZXRPGMBCV-UHFFFAOYSA-N	CC1=CC(=C(O)C(=C1)C(C)(C)C)C(C)(C)C	25251.9	49879.9	34488.8	43704.9	20781.1	37563.3
POS_2399	[M+H]+	Caffeine	0.345819	1.74761	0.447426	195.088	3.519	C07481	Organoheterocyclic compounds	Imidazopyrimidines	Purines and purine derivatives	C8H10N4O2	RYYVLZVUVIJVGH-UHFFFAOYSA-N	C[N]1C=NC2=C1C(=O)N(C)C(=O)N2C	89030.4	15177.3	168364	25814.3	60945.5	69207.9
POS_5893	[M+H]+	Calycosin	0.343171	0.788441	0.398913	285.074	5.641	C01562	Phenylpropanoids and polyketides	Isoflavonoids	O-methylated isoflavonoids	C16H12O5	ZZAJQOPSWWVMBI-UHFFFAOYSA-N	COC1=C(O)C=C(C=C1)C2=COC3=CC(=CC=C3C2=O)O	52647.3	43095.3	31786.1	37087	51507.7	73153.4
POS_10761	[M+H-H2O]+	Campesterol	0.172826	1.0044	0.969199	383.363	12.648		Lipids and lipid-like molecules	Steroids and steroid derivatives	Ergostane steroids	C28H48O	SGNBVLSWZMBQTH-PODYLUTMSA-N	CC(C)[C@H](C)CC[C@@H](C)[C@H]1CC[C@H]2[C@@H]3CC=C4C[C@@H](O)CC[C@]4(C)[C@H]3CC[C@]12C	646612	632240	744545	668232	781527	564782
POS_1236	[M+H]+	Camphor	0.464095	0.887935	0.801184	153.127	6.027		Lipids and lipid-like molecules	Prenol lipids	Monoterpenoids		DSSYKIVIOFKYAU-UHFFFAOYSA-N	CC1(C)C2CCC1(C)C(=O)C2	24648.5	206278	131347	139849	98262.6	169884
POS_9252	[M+H]+	Candidone	0.677196	0.711194	0.449875	353.17	7.019		Phenylpropanoids and polyketides	Flavonoids	Flavans	C22H24O4	JYESOAFLKFHYHP-SFHVURJKSA-N	COC1=CC(=C2C(=O)CC(OC2=C1CC=C(C)C)C3=CC=CC=C3)OC	309781	262839	98914.6	323808	158235	462193
POS_2290	[M+H]+	Carbendazim	4.27263	1.31324	0.80389	192.076	4.555	C10897	Organic acids and derivatives	Organic phosphoric acids and derivatives	Phosphate esters	C9H9N3O2	TWFZGCMQGLPBSX-UHFFFAOYSA-N	COC(=O)NC1=NC2=CC=CC=C2[NH]1	4909.67	6.63283e+06	7.34987e+06	1.05093e+07	90640.7	51319.4
POS_10337	[M+H]+	Casticin	0.143079	1.7783	0.167619	375.105	2.108		Phenylpropanoids and polyketides	Flavonoids	O-methylated flavonoids	C19H18O8	PJQLSMYMOKWUJG-UHFFFAOYSA-N	COC1=C(O)C=C(C=C1)C2=C(OC)C(=O)C3=C(O2)C=C(OC)C(=C3O)OC	8956.01	6019.11	4017.55	5111.25	2391.28	3177.71
POS_10791	[M+Na]+	Catalpol	0.0925928	0.655393	0.340542	385.111	3.563	C09773	Organic oxygen compounds	Organooxygen compounds	Carbohydrates and carbohydrate conjugates		LHDWRKICQLTVDL-PZYDOOQISA-N	OCC1OC(OC2OC=CC3C(O)C4OC4(CO)C23)C(O)C(O)C1O	440.029	3260.92	1842.19	2618.58	3555.08	2284.06
POS_18913	[M+Na]+	Catechin pentaacetate	0.0350751	1.73229	0.126884	523.119	3.334		Phenylpropanoids and polyketides	Flavonoids	Flavans	C25H24O11	BKYWAYNSDFXIPL-LOSJGSFVSA-N	CC(=O)OC1CC2=C(OC1C3=CC=C(OC(C)=O)C(=C3)OC(C)=O)C=C(OC(C)=O)C=C2OC(C)=O	590.478	432.464	293.637	201.083	341.31	217.627
POS_23311	[M+H]+	Cepharanthine	0.284544	0.904363	0.838731	607.277	10.906		Lignans, neolignans and related compounds			C37H38N2O6	YVPXVXANRNDGTA-WDYNHAJCSA-N	COC1=C2OC3=CC=C(C[C@@H]4N(C)CCC5=CC6=C(OCO6)C(=C45)OC7=CC8=C(CCN(C)[C@@H]8CC(=C2)C=C1)C=C7OC)C=C3	2293.23	82779.4	68164.8	61004	55908.3	52530.2
POS_20551	[M+Na]+	Chaetoglobosin A	0.202928	0.859687	0.653646	551.241	5.487		Alkaloids and derivatives	Cytochalasans	Chaetoglobosins	C32H36N2O5	OUMWCYMRLMEZJH-VOXRAUTJSA-N	C[C@H]/1C\\C=C\\[C@H]2[C@@H]3O[C@]3(C)[C@@H](C)[C@H]4[C@H](CC5=C[NH]C6=CC=CC=C56)NC(=O)[C@@]24C(=O)\\C=C\\C(=O)[C@H](O)\\C(=C1)C	9451.94	31724	20072.6	20324.8	22415.8	28504.5
POS_19266	[M+H]+	Chaetoglobosin C	0.250615	0.853493	0.670498	529.256	6.323		Alkaloids and derivatives	Cytochalasans	Chaetoglobosins	C32H36N2O5	RIZAHVBYKWUPHQ-MASOQXDXSA-N	C[C@H]\\1C\\C=C/[C@H]2[C@@H]3O[C@]3(C)[C@@H](C)[C@H]4[C@H](CC5=C[NH]C6=CC=CC=C56)NC(=O)[C@@]24C(=O)CCC(=O)C(=O)\\C(=C1)C	13830.5	42560.6	34992	50634.5	29295.6	27139.4
POS_34577	[M]+	Chlorophyll a from Chlorella	0.0779818	1.73857	0.342682	893.539	12.889		Organoheterocyclic compounds	Tetrapyrroles and derivatives	Chlorins	C55H72MgN4O5	ATNHDLDRLWWWCB-ZPPYAHEGSA-M	[Mg++].CCC1=C(C)C2=NC1=CC3=C(C)C4=C([N-]3)C(=C5N=C(C=C6[N-]C(=C2)C(=C6C)C=C)C(C)C5CCC(=O)OCC=C(C)CCCC(C)CCCC(C)CCCC(C)C)C(C(=O)OC)C4=O	3813.29	1451.84	1376.58	1598.01	567.951	1654.24
POS_34915	[M]+	Chlorophyll b from Chlorella	0.226817	4.17855	0.229574	907.496	12.852		Organoheterocyclic compounds	Tetrapyrroles and derivatives	Chlorins	C55H70MgN4O6	MSLKMRUEVOYOOZ-FCFLHPMBSA-L	[Mg++].CCC1=C(C=O)C2=NC1=CC3=C(C)C4=C([N-]3)C(=C5N=C(C=C6[N-]C(=C2)C(=C6C)C=C)C(C)C5CCC(=O)OCC=C(C)CCCC(C)CCCC(C)CCCC(C)C)C(C(=O)OC)C4=O	307.333	58734	67317.6	919.361	2733.48	26587.1
POS_9087	[M+H]+	Chlorpyrifos	0.742722	1.77265	0.224414	349.931	9.967	C14322	Benzenoids	Benzene and substituted derivatives	Aniline and substituted anilines	C9H11Cl3NO3PS	SBPBAQFWLVIOKP-UHFFFAOYSA-N	CCO[P](=S)(OCC)OC1=NC(=C(Cl)C=C1Cl)Cl	159005	265439	252239	242717	43029	95989.1
POS_10749	[M+H]+	Cholest-4,6-Dien-3-One	0.230127	1.13324	0.426034	383.326	11.878		Lipids and lipid-like molecules	Steroids and steroid derivatives	Cholestane steroids	C27H42O	XIWMRKFKSRYSIJ-GYKMGIIDSA-N	CC(C)CCCC(C)C1CCC2C3C=CC4=CC(=O)CCC4(C)C3CCC12C	159800	150150	103569	110011	127369	127520
POS_10858	[M+H]+	Cholestenone	0.389424	1.16502	0.405317	385.347	12.276	C00599	Lipids and lipid-like molecules	Steroids and steroid derivatives	Cholestane steroids	C27H44O	NYOXRYYXRWJDKP-GYKMGIIDSA-N	CC(C)CCC[C@@H](C)[C@H]1CC[C@H]2[C@@H]3CCC4=CC(=O)CC[C@]4(C)[C@H]3CC[C@]12C	264145	200769	156323	169463	182754	181025
POS_12095	[M+H]+	Cholic acid	0.0894548	1.54889	0.658805	409.224	4.812	C00695	Lipids and lipid-like molecules	Steroids and steroid derivatives	Bile acids, alcohols and derivatives	C24H40O5	BHQCQFFYRZLCQQ-OELDTZBJSA-N	CC(CCC(O)=O)C1CCC2C3C(O)CC4CC(O)CCC4(C)C3CC(O)C12C	6463.2	601.943	1034.27	851.962	1268.04	3109.16
POS_172	[M]+	Choline	2.0993	1.07448	0.675957	104.107	1.121	C00114	Organic nitrogen compounds	Organonitrogen compounds	Quaternary ammonium salts	C5H14NO	OEYIOHPDSNJKLS-UHFFFAOYSA-N	C[N+](C)(C)CCO	7.73029e+06	1.13237e+07	8.98275e+06	1.06476e+07	7.53125e+06	7.91438e+06
POS_6919	[M+H]+	Cimifugin	0.517897	2.27652	0.540066	307.116	4.485		Organoheterocyclic compounds	Benzopyrans	1-benzopyrans	C16H18O6	ATDBDSBKYKMRGZ-ZDUSSCGKSA-N	COC1=C2CC(OC2=CC3=C1C(=O)C=C(CO)O3)C(C)(C)O	165187	7747.41	13503	18551.7	21266.1	42078
POS_6377	[M+H]+	Cinchonidine	0.146564	1.04262	0.862808	295.187	5.592	C11379	Alkaloids and derivatives	Cinchona alkaloids		C19H22N2O	KMPWYEUPVWOPIM-UHFFFAOYNA-N	OC(C1CC2CCN1CC2C=C)C3=CC=NC4=CC=CC=C34	32422.8	64758.2	52182.2	53672.7	36181.4	53403.9
POS_635	[M+H]+	Cinnamaldehyde	0.196537	0.60596	0.262882	133.063	4.187	C00903	Phenylpropanoids and polyketides	Cinnamaldehydes		C9H8O	KJPRLNWUNMBNBZ-QPJJXVBHSA-N	O=CC=CC1=CC=CC=C1	1389.08	11784.9	5425.07	10241.9	11366.7	9084.94
POS_3857	[M]+	Cinnamoylcholine	0.091111	0.803312	0.54945	234.147	3.941		Phenylpropanoids and polyketides	Cinnamic acids and derivatives	Cinnamic acid esters	[C14H20NO2]+	JSIOTGHMQGLKET-MDZDMXLPSA-N	C[N+](C)(C)CCOC(=O)C=CC1=CC=CC=C1	1714.58	4797.34	3035.97	5508.4	3485.2	2892.07
POS_8409	[M+Na]+	Cirsimaritin	0.130038	1.06341	0.82395	337.067	4.37	C17785	Phenylpropanoids and polyketides	Flavonoids	O-methylated flavonoids	C17H14O6	ZIIAJIWLQUVGHB-UHFFFAOYSA-N	COC1=CC2=C(C(=C1OC)O)C(=O)C=C(O2)C3=CC=C(O)C=C3	30150.1	68751.9	58153.5	51310.2	37360.3	59020.4
POS_1966	[M+H]+	cis-Caffeic acid	0.123366	0.840988	0.765029	181.05	2.87		Phenylpropanoids and polyketides	Cinnamic acids and derivatives	Hydroxycinnamic acids and derivatives	C9H8O4	QAIPRVGONGVQAS-RQOWECAXSA-N	OC(=O)\\C=C/C1=CC=C(O)C(=C1)O	31391.9	18481.8	6824.33	14472.7	39710.2	13235.5
POS_3491	[M+H]+	cis-Nerolidol	0.939265	0.56439	0.235474	223.206	9.297		Lipids and lipid-like molecules	Prenol lipids	Sesquiterpenoids	C15H26O	FQTLCLSUCSAZDY-KAMYIIQDSA-N	CC(C)=CCCC(C)=CCCC(C)(O)C=C	82439	182843	98401.9	139627	172713	332045
POS_7825	[M+H]+	Citalopram	0.331439	1.07448	0.90223	325.178	7.261	C07572	Benzenoids	Benzene and substituted derivatives	Phenylbutylamines	C20H21FN2O	WSEQXVZVJXJVFP-UHFFFAOYSA-N	CN(C)CCCC1(OCC2=CC(=CC=C12)C#N)C3=CC=C(F)C=C3	1577.41	156799	110209	105091	65255.9	79620
POS_4444	[M+H]+	Citrinin	0.255801	3.00458	0.251587	251.086	3.282	C16765	Organoheterocyclic compounds	Benzopyrans		C13H14O5	CQIUKKVOEOPUDV-IYSWYEEDSA-N	CC1OC=C2C(=C(C(O)=O)C(=O)C(=C2C1C)C)O	25498	8355.86	4749.18	4473.68	4812.69	3561.69
POS_2827	[M+H]+	Citropten	0.479355	0.604565	0.274027	207.049	1.262		Phenylpropanoids and polyketides	Coumarins and derivatives		C11H10O4	NXJCRELRQHZBQA-UHFFFAOYSA-N	COC1=CC(=C2C=CC(=O)OC2=C1)OC	35379.2	40104.2	69683.7	40223.1	118347	81548
POS_7342	[M+H]+	Clomipramine	0.628359	2857.09	0.373983	315.16	0.093	C06918	Organoheterocyclic compounds	Benzazepines	Dibenzazepines	C19H23ClN2	GDLIGKIOYRNHDA-UHFFFAOYSA-N	CN(C)CCCN1C2=C(CCC3=CC=C(Cl)C=C13)C=CC=C2	150380	6.8185	9.17157	4.18595	18.39	30.0635
POS_7909	[M+H]+	Clozapine	0.215162	0.596133	0.0277044	327.141	3.58	C06924	Organic oxygen compounds	Organooxygen compounds	Ethers	C18H19ClN4	QZUDBNBUXVUHMW-UHFFFAOYSA-N	CN1CCN(CC1)C2=NC3=CC(=CC=C3NC4=CC=CC=C24)Cl	6190.99	8913.13	5476.9	9767.29	12060.4	12696.5
POS_31420	[M+H]+	Coenzyme Q9	0.253384	0.686202	0.379223	795.629	13.204					C54H82O4	UUGXJSBPSRROMU-WJNLUYJISA-N	O=C1C(OC)=C(OC)C(=O)C(=C1C)CC=C(C)CCC=C(C)CCC=C(C)CCC=C(C)CCC=C(C)CCC=C(C)CCC=C(C)CCC=C(C)CCC=C(C)C	1861.64	25034.3	18833.7	23938.6	23164.5	19538.5
POS_29067	[2M+Na]+	Cortisone	0.576114	1.05504	0.883268	743.38	9.353		Lipids and lipid-like molecules	Steroids and steroid derivatives	Hydroxysteroids	C21H28O5	MFYSYFVPBJMHGN-ZPOLXVRWSA-N	CC12CCC(=O)C=C1CCC3C4CCC(O)(C(=O)CO)C4(C)CC(=O)C23	576703	1.09729e+06	1.05033e+06	1.10104e+06	354696	1.12646e+06
POS_7605	[M+H]+	Corylin	1.24965	0.972676	0.941395	321.106	7.598		Phenylpropanoids and polyketides	Isoflavonoids	Pyranoisoflavonoids	C20H16O4	PWAACAMQKVIVPZ-UHFFFAOYSA-N	CC1(C)OC2=C(C=C1)C=C(C=C2)C3=COC4=CC(=CC=C4C3=O)O	1.83812e+06	999261	796513	826014	1.09356e+06	1.81641e+06
POS_9374	[M+H]+	Corynanthine	0.100302	0.695327	0.500229	355.191	6.275		Alkaloids and derivatives	Yohimbine alkaloids		C21H26N2O3	BLGXFZZNTVWLAY-UHFFFAOYNA-N	COC(=O)C1C(O)CCC2CN3CCC4=C([NH]C5=CC=CC=C45)C3CC12	1694.28	5758.38	3654.23	7339.36	7006.22	1628.05
POS_10822	[M+H]+	Corynoxine	0.427515	1.09289	0.932232	385.209	7.964					C22H28N2O4	DAXYUDFNWXHGBE-WMLLIFGASA-N	CC[C@@H]1CN2CC[C@@]3([C@@H]2C[C@@H]1/C(=C/OC)/C(=O)OC)C4=CC=CC=C4NC3=O	277519	3511.16	43407.8	76443.5	17220.9	203197
POS_3815	[M+H]+	Costunolide	0.3027	0.771059	0.501128	233.15	7.289		Lipids and lipid-like molecules	Prenol lipids	Terpene lactones	C15H20O2	HRYLQFBHBWLLLL-AHNJNIBGSA-N	C\\C1=C/CC\\C(=C\\[C@H]2OC(=O)C(=C)[C@@H]2CC1)C	27416.8	70488.4	88430.3	76538.5	112140	52983.6
POS_4263	[M+H]+	Cotoin	0.239736	0.961388	0.944841	245.08	6.21					C14H12O4	HNJZOHHIXSIJFG-UHFFFAOYSA-N	COC1=CC(=C(C(=C1)O)C(=O)C2=CC=CC=C2)O	34232.7	80008	16792.6	22422.6	41448.5	72424.8
POS_8827	[M+NH4]+	Coumaric acid O-glucoside	1.21085	0.545609	0.215126	344.136	2.733		Organic oxygen compounds	Organooxygen compounds	Carbohydrates and carbohydrate conjugates	C15H18O8	LJFYQZQUAULRDF-FDGSXQGBSA-N	OCC1OC(OC2=CC=C(C=CC(O)=O)C=C2)C(O)C(O)C1O	15058.4	374260	186036	372226	393507	288785
POS_974	[M+H]+	Coumarin	0.279619	5.51107	0.350943	147.042	4.551	C05851	Phenylpropanoids and polyketides	Coumarins and derivatives		C9H6O2	ZYGHJZDHTFUPRJ-UHFFFAOYSA-N	O=C1OC2=C(C=CC=C2)C=C1	32417.3	4172.61	1669.25	1736.88	1222.5	3982.86
POS_22972	[M+H]+	Crassostreaxanthin B	0.214033	1.88083	0.601658	599.407	12.064		Lipids and lipid-like molecules	Prenol lipids	Sesterterpenoids	C40H54O4	LGLPDUBVWXHHHU-ZCJJJFIZSA-N	CC(=O)C[C@@H](O)CC(/C)=C(C)/CC(=O)C(/C)=C/C=C/C(C)=C/C=C/C=C(C)/C=C/C=C(C)/C#CC1=C(C)C[C@@H](O)CC1(C)C	35685.7	3456.53	1328.72	9244.18	6143.39	6130.02
POS_4087	[M+H]+	Culmorin	0.327307	1.32334	0.580417	239.199	6.064		Lipids and lipid-like molecules	Prenol lipids	Monoterpenoids	C15H26O2	VWMGBHVRRNKOAE-PDMNRUCYSA-N	CC1(C)CCC[C@]2(C)[C@H]3[C@H](O)C[C@]2(C)C(O)[C@@H]13	52034.9	346182	239655	177723	145644	158650
POS_4002	[M+H]+	Curdione	0.166491	1.14014	0.303761	237.185	9.487					C15H24O2	KDPFMRXIVDLQKX-ISGXEFFDSA-N	C[C@H]1CC/C=C(\\CC(=O)[C@@H](CC1=O)C(C)C)/C	67677.1	56357.6	54509.9	59404.5	53671.9	43522.4
POS_22147	[M]+	Cyanidin 3-O-beta-D-sambubioside	0.188904	0.982126	0.978733	581.163	4.392		Phenylpropanoids and polyketides	Flavonoids	Flavonoid glycosides	C26H29O15	ZPPQIOUITZSYAO-AOBOYTTNSA-O	OCC1OC(OC2=CC3=C(C=C(O)C=C3O)[O+]=C2C4=CC=C(O)C(=C4)O)C(OC5OCC(O)C(O)C5O)C(O)C1O	60210.9	20242.7	12295.2	16250.9	57734.3	20451.6
POS_14504	[M]+	Cyanidin 3-O-glucoside	0.899937	0.501737	0.436128	449.107	2.949		Phenylpropanoids and polyketides	Flavonoids	Flavonoid glycosides	[C21H21O11]+	RKWHWFONKJEUEF-GQUPQBGVSA-O	OC[C@H]1O[C@@H](OC2=CC3=C(C=C(O)C=C3O)[O+]=C2C4=CC(=C(O)C=C4)O)[C@H](O)[C@@H](O)[C@@H]1O	180685	57231.3	149424	32068.4	524340	215590
POS_22772	[M]+	Cyanidin 3-O-rutinoside	0.0228121	1.41415	0.506833	595.16	4.211	C08620	Phenylpropanoids and polyketides	Flavonoids	Flavonoid glycosides	C27H31O15	USNPULRDBDVJAO-FXCAAIILSA-O	C[C@@H]1O[C@@H](OC[C@H]2O[C@@H](OC3=CC4=C(O)C=C(O)C=C4[O+]=C3C5=CC=C(O)C(=C5)O)[C@H](O)[C@@H](O)[C@@H]2O)[C@H](O)[C@H](O)[C@H]1O	3228.13	6132.27	1970.23	1376.27	2265.23	4370.83
POS_27151	[M+NH4]+	Cyanidin-3-(6''-malonylglucoside)	0.167971	0.463463	0.249017	697.336	9.261					C24H23O14	ROQLTZUOXIQBDO-GRAUSCIISA-O	C1=CC(=C(C=C1C2=[O+]C3=CC(=CC(=C3C=C2O[C@H]4C(C([C@@H](C(O4)COC(=O)CC(=O)O)O)O)O)O)O)O)O	6480.94	1766.17	1340.47	2573.41	9733.19	8380.25
POS_18927	[M+K]+	cyclo[DL-Ala-DL-Trp-DL-Ala-DL-Val-Gly]	0.34987	0.614609	0.359022	523.211	4.689		Organic acids and derivatives	Carboxylic acids and derivatives	Amino acids, peptides, and analogues	C24H32N6O5	NYPFHMYOQFDZQG-UHFFFAOYSA-N	CC(C)C1NC(=O)C(C)NC(=O)C(CC2=C[NH]C3=C2C=CC=C3)NC(=O)C(C)NC(=O)CNC1=O	4307.07	37574	26167.1	56211.6	26285.1	28221.1
POS_18381	[M+H]+	Cycloastragenol	0.807674	0.843226	0.514722	513.351	9.938					C30H50O5	WENNXORDXYGDTP-UOUCMYEWSA-N	C[C@]12CC[C@@]34C[C@@]35CC[C@@H](C([C@@H]5[C@H](C[C@H]4[C@@]1(C[C@@H]([C@@H]2[C@]6(CC[C@H](O6)C(C)(C)O)C)O)C)O)(C)C)O	471455	572956	244299	438242	618680	471387
POS_5746	[M+H]+	Cycloheximide	0.059954	1.15423	0.590677	282.171	5.577		Organoheterocyclic compounds	Pyridines and derivatives	Hydropyridines	C15H23NO4	YPHMISFOHDHNIV-FSZOTQKASA-N	C[C@H]1C[C@H](C)C(=O)[C@@H](C1)[C@H](O)CC2CC(=O)NC(=O)C2	78128.4	131861	66571.5	77220.7	70407.7	91978.3
POS_1592	[M+H]+	Cyromazine	0.0576972	0.915924	0.723563	167.104	2.181	C14147	Organoheterocyclic compounds	Triazines	Aminotriazines	C6H10N6	LVQDKIWDGQRHTE-UHFFFAOYSA-N	NC1=NC(=NC(=N1)NC2CC2)N	1557.26	3535.7	2421.8	2713.18	2403.81	3087.58
POS_4237	[M+H]+	Cytidine	0.133831	0.760285	0.472405	244.08	1.209		Nucleosides, nucleotides, and analogues	Pyrimidine nucleosides		C9H13N3O5	UHDGCWIWMRVCDJ-XVFCMESISA-N	NC1=NC(=O)N(C=C1)[C@@H]2O[C@H](CO)[C@@H](O)[C@H]2O	8707.76	4583.2	11558.3	7324.71	9405.54	15953.8
POS_16915	[M+H]+	Cytidine 5'-diphosphocholine	0.0558537	1.78622	0.445916	489.228	7.305		Nucleosides, nucleotides, and analogues	Pyrimidine nucleotides	Pyrimidine ribonucleotides	C14H26N4O11P2	RZZPDXZPRHQOCG-OJAKKHQRSA-N	C[N+](C)(C)CCO[P]([O-])(=O)O[P](O)(=O)OCC1OC(C(O)C1O)N2C=CC(=NC2=O)N	1365.59	3778.29	10065.6	3050.77	1873.5	3590.65
POS_1944	[M+H]+	D-Glucosamine	1.65276	1.19693	0.778042	180.086	1.088	C00329	Organic oxygen compounds	Organooxygen compounds	Carbohydrates and carbohydrate conjugates	C6H13NO5	MSWZFWKMSRAUBD-IVMDWMLBSA-N	N[C@H]1C(O)O[C@H](CO)[C@@H](O)[C@@H]1O	3.22024e+06	849475	643198	874220	1.63008e+06	1.43321e+06
POS_12536	[M+H]+	Daidzin	0.0636019	0.980349	0.945794	417.114	4.291	C10216	Phenylpropanoids and polyketides	Isoflavonoids	Isoflavonoid O-glycosides	C21H20O9	KYQZWONCHDNPDP-QNDFHXLGSA-N	OC[C@H]1O[C@@H](OC2=CC3=C(C=C2)C(=O)C(=CO3)C4=CC=C(O)C=C4)[C@H](O)[C@@H](O)[C@@H]1O	6645.77	9762.68	3586.57	5883.47	7002.62	7509.74
POS_14899	[M+Na]+	Darendoside A	0.150998	0.905631	0.779952	455.152	4.326		Organic oxygen compounds	Organooxygen compounds	Carbohydrates and carbohydrate conjugates	C19H28O11	WWVATHTYIDDAQF-DERWZFJFSA-N	OCC1OC(OCCC2=CC=C(O)C=C2)C(OC3OCC(O)(CO)C3O)C(O)C1O	21686.1	11706.6	8670.41	10061.1	16375.4	20009.7
POS_23509	[M+H]+	Daurisoline	0.0467226	1.37919	0.393476	611.305	7.311					C37H42N2O6	BURJAQFYNVMZDV-FIRIVFDPSA-N	CN1CCC2=CC(=C(C=C2[C@H]1CC3=CC=C(C=C3)OC4=C(C=CC(=C4)C[C@@H]5C6=CC(=C(C=C6CCN5C)OC)O)O)OC)OC	2931.84	3154.21	2535.68	2051.63	3497.32	702.347
POS_16479	[M+Na]+	Decaethylene glycol	0.158908	1.02172	0.948829	481.253	9.696		Organic oxygen compounds	Organooxygen compounds	Ethers	C20H42O11	DTPCFIHYWYONMD-UHFFFAOYSA-N	OCCOCCOCCOCCOCCOCCOCCOCCOCCOCCO	22641.1	60841.4	58645.7	53406.6	30383.8	55315.9
POS_3079	[M+H]+	Dehydro-piliformic-acid	0.250793	1.44028	0.291512	213.11	3.847		Lipids and lipid-like molecules	Fatty Acyls	Fatty acids and conjugates	C11H16O4	XXJJXRVXYCYMBK-INTFFVIUSA-N	CC(C(O)=O)C(=CCCCC=C)C(O)=O	43492	25106.4	21552.6	27065.7	15701.6	19825.5
POS_6716	[M+H]+	Dehydroevodiamine	0.0611971	0.411853	0.104003	302.12	1.279		Organoheterocyclic compounds	Diazanaphthalenes	Benzodiazines	C19H15N3O	VXHNSVKJHXSKKM-UHFFFAOYSA-N	CN1C2=C(C=CC=C2)C(=O)N3CCC4=C5C=CC=CC5=NC4=C13	139.069	717.868	99.0862	934.085	739.318	647.87
POS_23321	[M+Na]+	Dehydroxynocardamine	0.165083	0.691899	0.194674	607.345	8.723		Phenylpropanoids and polyketides	Macrolactams		C27H48N6O8	ABHHIGWFFMCQOC-UHFFFAOYSA-N	ON1CCCCCN=C(O)CCC(=O)N(O)CCCCCN=C(O)CCC(=NCCCCCN=C(O)CCC1=O)O	4220.93	9829.89	6824.81	11684	10669.4	7818.1
POS_3101	[M+H]+	delta-Tridecalactone	0.256458	0.847713	0.654283	213.184	4.986					C13H24O2	RZZLMGATMUAJPX-UHFFFAOYSA-N	CCCCCCCCC1CCCC(=O)O1	12360.6	52775.1	33128.1	41012.9	43145.7	31757.8
POS_4980	[M+H]+	Dendrobine	0.0859359	1.39422	0.386886	264.192	7.455					C16H25NO2	RYAHJFGVOCZDEI-HJRIULOKSA-N	CC(C)[C@H]1[C@@H]2[C@@H]3CC[C@H]4[C@@]3([C@@H]([C@H]1OC2=O)N(C4)C)C	11745.5	14871.3	4971.63	8123.62	8814.39	5718.72
POS_12675	[M+Na]+	Denticulatin B	1.741	0.414745	0.201147	419.29	10.145					C23H40O5	BFQWBQIYMSVPOL-MVDSRTOYSA-N	CC/C=C(\C)/C[C@@H](C)C(=O)[C@@H](C)[C@@]1([C@@H](C)[C@H]([C@@H](C)[C@H]([C@@H](C)C(=O)CC)O1)O)O	274673	352615	169957	212075	1.04052e+06	669656
POS_22703	[M+Na]+	Deoxykhivorin	0.0668753	1.12179	0.889092	593.274	12.623		Organoheterocyclic compounds	Naphthopyrans		C32H42O9	SUQFMFHTLHMZNM-SLBLICBISA-N	CC(=O)OC1CC(OC(C)=O)C2(C)C3CCC4(C)C(OC(=O)C=C4C3(C)C(CC2C1(C)C)OC(C)=O)C5=COC=C5	5634.35	3136.32	32483.3	18725.2	6400.37	11649.6
POS_7897	[M+H]+	Derrustone	0.159302	1.01053	0.95749	327.085	8.143		Phenylpropanoids and polyketides	Isoflavonoids	O-methylated isoflavonoids	C18H14O6	IMPPSJRGMZYGJW-UHFFFAOYSA-N	COC1=CC(=C2C(=O)C(=COC2=C1)C3=CC4=C(OCO4)C=C3)OC	55959	42642.9	39293.8	39065.1	38434.1	58959.5
POS_7681	[M+Na]+	Desmedipham	0.101095	1.03893	0.903525	323.11	3.603		Benzenoids	Benzene and substituted derivatives	Phenylcarbamic acid esters	C16H16N2O4	WZJZMXBKUWKXTQ-UHFFFAOYSA-N	CCOC(=O)NC1=CC=CC(=C1)OC(=O)NC2=CC=CC=C2	33678.4	18462.4	13456.8	19710.5	24655.7	18773.1
POS_3646	[M+H]+	Desmethoxyyangonin	0.233003	0.890095	0.66544	229.085	6.768	C09925	Phenylpropanoids and polyketides	Kavalactones		C14H12O3	DKKJNZYHGRUXBS-BQYQJAHWSA-N	COC1=CC(=O)OC(=C1)C=CC2=CC=CC=C2	83195.8	50522.3	42021.8	59836.9	53855.4	83747
POS_2847	[M+H]+	Dexibuprofen	0.159617	1.26107	0.546746	207.135	5.138		Phenylpropanoids and polyketides	Phenylpropanoic acids		C13H18O2	HEFNNWSXXWATRW-JTQLQIEISA-N	CC(C)CC1=CC=C(C=C1)[C@H](C)C(O)=O	33509	17804.3	12307.6	14593.1	14932	20924.6
POS_22264	[M+H]+	Diadinochrome A	0.121163	1.14846	0.156578	583.407	12.419		Lipids and lipid-like molecules	Prenol lipids	Triterpenoids	C40H54O3	USOIUYXBYYVLLZ-PMBXBIOBSA-N	CC1=C(C#C\\C(C)=C\\C=C\\C(C)=C\\C=C\\C=C(C)\\C=C\\C=C(/C)[C@H]2O[C@]3(C)C[C@@H](O)CC(C)(C)C3=C2)C(C)(C)C[C@H](O)C1	79399	97543.4	92812	86044.5	74258	74581.4
POS_23208	[M+Na]+	Diadinoxanthin A	0.0286291	1.09135	0.849889	605.221	3.984		Lipids and lipid-like molecules	Prenol lipids	Triterpenoids	C40H54O3	CQEFYCLCHZUMAF-ACABJTFYSA-N	CC1=C(C#CC(C)=CC=CC(C)=CC=CC=C(C)C=CC=C(C)C=CC23OC2(C)CC(O)(O)CC3(C)C)C(C)(C)CCC1	863.992	2232.03	1014.09	1505.47	1729.15	531.454
POS_4875	[M+H]+	Diaveridine	0.095656	1.09866	0.511591	261.13	2.966		Benzenoids	Benzene and substituted derivatives	Methoxybenzenes	C13H16N4O2	LDBTVAXGKYIFHO-UHFFFAOYSA-N	COC1=C(OC)C=C(CC2=C(N)N=C(N)N=C2)C=C1	23025.2	30208.6	27549.3	29278.3	24031.5	20219
POS_6852	[M+H]+	Diazinon	0.0338621	0.583672	0.403389	305.109	8.68	C14324	Organic acids and derivatives	Organic thiophosphoric acids and derivatives	Thiophosphoric acid esters	C12H21N2O3PS	FHIVAFMUCKRCQO-UHFFFAOYSA-N	CCO[P](=S)(OCC)OC1=NC(=NC(=C1)C)C(C)C	66.5638	448.456	606.716	660.02	1040.16	221.685
POS_5597	[M+H]+	Dibutyl phthalate	0.9516	0.66778	0.0613881	279.155	6.209	C14214	Benzenoids	Benzene and substituted derivatives	Benzoic acids and derivatives	C16H22O4	DOIRQSBPFJWKBE-UHFFFAOYSA-N	CCCCOC(=O)C1=CC=CC=C1C(=O)OCCCC	178548	266507	221070	324969	395658	276895
POS_9530	[M+H]+	Dichotomitin	0.0987529	0.860703	0.667141	359.075	2.888					C18H14O8	PFFOGGCBLWTCPM-UHFFFAOYSA-N	COC1=CC(=CC(=C1OC)O)C2=COC3=CC4=C(C(=C3C2=O)O)OCO4	13809.5	7022.77	5645.45	7778.22	13683	9301.67
POS_2018	[M+H]+	Dicyclohexylamine	0.284926	1.19496	0.277576	182.189	4.899		Organic nitrogen compounds	Organonitrogen compounds	Cyclohexylamines	C12H23N	XBPCUCUWBYBCDP-UHFFFAOYSA-N	C1CCC(CC1)NC2CCCCC2	123639	103480	80645.6	76264.8	91826.1	89460.9
POS_3459	[M+H]+	Diethyl phthalate	0.0958937	0.966201	0.924044	223.093	3.648	C14175	Benzenoids	Benzene and substituted derivatives	Benzoic acids and derivatives	C12H14O4	FLKPEMZONWLCSK-UHFFFAOYSA-N	CCOC(=O)C1=CC=CC=C1C(=O)OCC	16178.3	17980	4905.7	9841.81	15851	14737.7
POS_2295	[M+H]+	Diethyltoluamide	0.062562	1.03522	0.86046	192.137	6.681		Benzenoids	Benzene and substituted derivatives	Toluenes	C12H17NO	MMOXZBCLCQITDF-UHFFFAOYSA-N	CCN(CC)C(=O)C1=CC(=CC=C1)C	23414.8	13360.7	15442.5	17633.5	17541.2	15266.7
POS_11887	[M+H]+	Difenoconazole	0.133103	2.96875	0.319223	406.069	8.793		Organic acids and derivatives	Carboxylic acids and derivatives	Amino acids, peptides, and analogues	C19H17Cl2N3O3	BQYJATMQXGBDHF-UHFFFAOYSA-N	CC1COC(C[N]2C=NC=N2)(O1)C3=C(Cl)C=C(OC4=CC=C(Cl)C=C4)C=C3	157.179	8279.77	8187.67	5448.26	117.245	34.3565
POS_11421	[M+Na]+	Diffractaic acid	0.239477	0.838648	0.62324	397.126	4.426		Phenylpropanoids and polyketides	Depsides and depsidones		C20H22O7	MIJKZXWOOXIEEU-UHFFFAOYSA-N	COC1=C(C)C(=C(C(=C1)C)C(=O)OC2=C(C)C(=C(C(O)=O)C(=C2)C)O)OC	103818	39155.7	45309.1	64168.5	93936.2	66402.7
POS_11301	[M+H]+	Diflufenican	0.24118	1.36618	0.591809	395.072	3.01		Benzenoids	Benzene and substituted derivatives	Anilides	C19H11F5N2O2	WYEHFWKAOXOVJD-UHFFFAOYSA-N	FC1=CC=C(NC(=O)C2=C(OC3=CC=CC(=C3)C(F)(F)F)N=CC=C2)C(=C1)F	55499.9	14998	16206.7	20316.2	21750.4	21398.7
POS_5013	[M+H]+	Dihydro-3-methylene-4-[(2E)-3-methyl-4-(tetrahydro-4-methyl-5-oxo-2-furanyl)-2-buten-1-yl]-, (4R)-2(3H)-furanone,	0.436218	0.940473	0.779847	265.144	3.129		Lipids and lipid-like molecules	Prenol lipids	Terpene lactones	C15H20O4	KFKSQOIZZRZEFC-BZFAMWISSA-N	CC1CC(CC(C)=CCC2COC(=O)C2=C)OC1=O	818521	746280	384751	737550	701473	633924
POS_21059	[M+Na]+	Dihydrocelastryl diacetate	0.0246916	1.04184	0.84144	559.288	4.825		Benzenoids	Phenanthrenes and derivatives		C33H44O6	SAOOBRUHTPONGX-UANCAJPASA-N	CC(=O)OC1=C(OC(C)=O)C(=C2CC=C3C(C)(CCC4(C)C5CC(C)(CCC5(C)CCC34C)C(O)=O)C2=C1)C	7473.32	9680.43	14003.7	10234.5	9226.94	10444.7
POS_6126	[M+H]+	Dihydrokaempferol	0.607726	0.542591	0.056916	289.069	4.836	C00974	Phenylpropanoids and polyketides	Flavonoids	Flavans		PADQINQHPQKXNL-LSDHHAIUSA-N	O[C@@H]1[C@H](OC2=CC(=CC(=C2C1=O)O)O)C3=CC=C(O)C=C3	50542	64938.7	33721.4	83234.5	74590.8	117156
POS_6029	[M+H]+	Dihydrooroxylin A	0.406071	1.14034	0.696443	287.09	7.56		Phenylpropanoids and polyketides	Flavonoids	O-methylated flavonoids	C16H14O5	QUAPPCXFYKSDSV-UHFFFAOYSA-N	COC1=C(O)C2=C(OC(CC2=O)C3=CC=CC=C3)C=C1O	236060	134473	100240	100843	137121	174872
POS_11909	[M+NH4]+	Dihydroroseoside	0.255669	1.55946	0.315621	406.239	4.346		Lipids and lipid-like molecules	Fatty Acyls	Fatty acyl glycosides	C19H32O8	QFTPTUOKFIIFJH-AATRIKPKSA-N	CC(OC1OC(CO)C(O)C(O)C1O)\\C=C\\C2(O)C(C)CC(=O)CC2(C)C	40636.9	22074.9	15994.7	19431.1	21211.5	9827.88
POS_279	[M+H]+	Dihydrouracil	0.0877218	0.852915	0.620377	115.052	3.816	C00429	Organoheterocyclic compounds	Diazines	Pyrimidines and pyrimidine derivatives	C4H6N2O2	OIVLITBTBDPEFK-UHFFFAOYSA-N	OC1=NC(=NCC1)O	1757.35	5973.04	3730.02	4369.04	4805.4	4262.33
POS_2372	[M+H]+	Dimethyl phthalate	0.620951	1.58405	0.535427	195.058	8.426	C06318	Benzenoids	Benzene and substituted derivatives	Benzoic acids and derivatives	C10H10O4	NIQCNGHVCWTJSM-UHFFFAOYSA-N	COC(=O)C1=C(C=CC=C1)C(=O)OC	12980.6	386985	341544	277702	55457.3	134951
POS_11134	[M+H]+	Dioctyl phthalate	3.73732	0.51645	0.105004	391.284	11.814		Benzenoids	Benzene and substituted derivatives	Benzoic acids and derivatives	C24H38O4	MQIUGAXCHLFZKX-UHFFFAOYSA-N	CCCCCCCCOC(=O)C1=C(C=CC=C1)C(=O)OCCCCCCCC	2.47133e+06	2.12339e+06	1.53381e+06	2.68714e+06	5.63132e+06	3.54818e+06
POS_4191	[M+H]+	Dioctylamine	0.137981	0.988116	0.967961	242.287	9.762		Organic nitrogen compounds	Organonitrogen compounds	Amines	C16H35N	LAWOZCWGWDVVSG-UHFFFAOYSA-N	CCCCCCCCNCCCCCCCC	20919.5	17627.9	12927.5	11454.4	15063.7	25575.9
POS_34519	[M+Na]+	Dioscin	0.0772051	0.540664	0.0964471	891.456	8.406		Lipids and lipid-like molecules	Steroids and steroid derivatives	Steroidal glycosides		VNONINPVFQTJOC-ZGXDEBHDSA-N	C[C@@H]1CC[C@@]2(OC1)O[C@H]3C[C@H]4[C@@H]5CC=C6C[C@H](CC[C@]6(C)[C@H]5CC[C@]4(C)[C@H]3[C@@H]2C)O[C@@H]7O[C@H](CO)[C@@H](O[C@@H]8O[C@@H](C)[C@H](O)[C@@H](O)[C@H]8O)[C@H](O)[C@H]7O[C@@H]9O[C@@H](C)[C@H](O)[C@@H](O)[C@H]9O	324.773	1115.63	921.814	1156.44	1828.34	1384.32
POS_12482	[M+H]+	Diosgenin	0.323261	0.492521	0.114135	415.316	9.467	C08898	Lipids and lipid-like molecules	Prenol lipids	Triterpenoids	C27H42O3	WQLVFSAGQJTQCK-VKROHFNGSA-N	C[C@@H]1CC[C@@]2(OC1)O[C@H]3C[C@H]4[C@@H]5CC=C6C[C@@H](O)CC[C@]6(C)[C@H]5CC[C@]4(C)[C@H]3[C@@H]2C	5550.77	14242.1	11266.8	12609.1	21836.3	28617.4
POS_627	[M+H]+	DL-Isoleucine	0.21181	0.70212	0.330728	132.099	1.256	C16434	Organic acids and derivatives	Carboxylic acids and derivatives	Amino acids, peptides, and analogues	C6H13NO2	AGPKZVBTJJNPAG-UHFFFAOYSA-N	CCC(C)C(N)C(O)=O	12112.2	13369.1	6008.8	8307.77	18074	18468.4
POS_518	[M+H-2H2O]+	DL-Pipecolinic acid	0.259338	0.423661	0.100369	128.071	1.238	C00408	Organic acids and derivatives	Carboxylic acids and derivatives	Amino acids, peptides, and analogues	C6H11NO2	HXEACLLIILLPRG-YFKPBYRVSA-N	OC(=O)C1CCCCN1	458.508	9955.14	7820.88	19567.9	11762.9	11709.5
POS_8405	[M+NH4]+	Docosa-4,15-dien-1-yn-3-ol	0.649231	1.21298	0.326161	336.325	11.932					C22H38O	HEXQBSKJVUFXNG-RGGHYAJCNA-N	C#CC(O)C=CCCCCCCCCCC=CCCCCCC	1.7686e+06	1.8574e+06	1.4021e+06	1.54689e+06	939812	1.65854e+06
POS_17804	[M+H]+	Docosyl trans-ferulate	2.35612	0.726729	0.620667	503.407	13.572					C32H54O4	USNYNNITUQSEEV-SHHOIMCASA-N	O=C(OCCCCCCCCCCCCCCCCCCCCCC)C=CC1=CC=C(O)C(OC)=C1	16853.4	3.17179e+06	1.68007e+06	1.07586e+06	3.44442e+06	2.17922e+06
POS_7491	[M+H]+	Drofenine	0.418825	1.33335	0.665231	318.237	9.62		Benzenoids	Benzene and substituted derivatives		C20H31NO2	AGJBLWCLQCKRJP-UHFFFAOYSA-N	CCN(CC)CCOC(=O)C(C1CCCCC1)C2=CC=CC=C2	81634.1	281199	68653.8	164950	113938	44723.3
POS_17764	[M+Na]+	Ecdysterone	0.217343	0.914914	0.906867	503.293	9.044		Lipids and lipid-like molecules	Steroids and steroid derivatives	Bile acids, alcohols and derivatives	C27H44O7	NKDFYOWSKOHCCO-MQMWGCQISA-N	CC(C)(O)CCC(O)C(C)(O)C1CCC2(O)C3=CC(=O)C4CC(O)C(O)CC4(C)C3CCC12C	427165	65930.7	45813.2	298832	149051	141143
POS_12407	[M+H]+	Echimidine N-oxide	0.0625763	1.07567	0.840173	414.214	7.309		Alkaloids and derivatives			C20H31NO8	KDJGEXAPDZNXSD-KCFAIRMISA-N	C\\C=C(\\C)C(=O)O[C@@H]1CC[N+]2([O-])CC=C(COC(=O)[C@@](O)([C@H](C)O)C(C)(C)O)[C@H]12	2632.74	9747.31	8210.53	7190.27	5199.81	6751.99
POS_4328	[M+H]+	Ellipticine	0.486926	1.72561	0.196996	247.13	4.442		Organoheterocyclic compounds	Indoles and derivatives	Carbazoles	C17H14N2	CTSPAMFJBXKSOY-UHFFFAOYSA-N	CC1=C2C=CN=CC2=C(C)C3=C1[NH]C4=C3C=CC=C4	116192	321863	223325	142898	125939	114435
POS_7932	[M+Na]+	Ent-17-Hydroxy-16beta-kauran-19-al	0.0784164	1.18771	0.338107	327.229	9.492		Lipids and lipid-like molecules	Prenol lipids	Diterpenoids	C20H32O2	ACXLVKYMISNUFD-UHFFFAOYSA-N	CC1(CCCC2(C)C1CCC34CC(CO)C(CCC23)C4)C=O	26055.2	38859.3	25882.4	27256.4	24025.4	25165
POS_6192	[M+H]+	Epicatechin	0.905042	0.218546	0.307507	291.082	1.782	C17590	Phenylpropanoids and polyketides	Flavonoids	Flavans	C15H14O6	PFTAWBLQPZVEMU-UHFFFAOYSA-N	OC1CC2=C(O)C=C(O)C=C2OC1C3=CC(=C(O)C=C3)O	405.441	3162.34	92045.9	48759.2	57433.2	331308
POS_14234	[M+NH4]+	Epilupeol	0.189488	1.04316	0.857252	444.415	13.002		Lipids and lipid-like molecules	Prenol lipids	Triterpenoids	C30H50O	MQYXUWHLBZFQQO-ISZJTHHZSA-N	CC(=C)C1CCC2(C)CCC3(C)C(CCC4C5(C)CCC(O)C(C)(C)C5CCC34C)C12	212956	258433	305569	185575	344975	214263
POS_13292	[M+H]+	Ergosterol peroxide	0.873071	0.818434	0.799651	429.335	12.024		Lipids and lipid-like molecules	Steroids and steroid derivatives	Ergostane steroids	C28H44O3	VXOZCESVZIRHCJ-KGHQQZOUSA-N	CC(C)[C@@H](C)/C=C/[C@@H](C)[C@H]1CC[C@@H]2[C@]1(C)CC[C@@H]3[C@@]4(C)CC[C@H](O)C[C@@]45OO[C@@]23C=C5	491499	135465	44486.2	57163.3	283369	479876
POS_8515	[M+H]+	Erucamide	2.07037	1.10838	0.468889	338.341	12.206		Lipids and lipid-like molecules	Fatty Acyls	Fatty amides	C22H43NO	UAUDZVJPLUQNMU-KTKRTIGZSA-N	CCCCCCCCC=CCCCCCCCCCCCC(O)=N	6.68198e+07	6.58492e+07	4.99843e+07	6.09078e+07	4.48505e+07	5.90345e+07
POS_12328	[M+Na]+	Erysubin F	0.115882	1.04281	0.946056	413.173	6.02		Phenylpropanoids and polyketides	Isoflavonoids	Isoflav-2-enes	C25H26O4	YBJJPNXZVZRDIU-UHFFFAOYSA-N	CC(C)=CCC1=C(O)C=CC(=C1)C2=COC3=C(CC=C(C)C)C(=CC=C3C2=O)O	2485.07	29998.4	12505.7	8643.24	16382.6	18116.3
POS_2842	[M+H]+	Ethyl 4-methoxycinnamate	0.212345	1.26204	0.341298	207.099	4.71					C12H14O3	DHNGCHLFKUPGPX-RMKNXTFCSA-N	CCOC(=O)/C=C/C1=CC=C(C=C1)OC	78004.6	74626.3	41198.9	44820	58776	49989.2
POS_2445	[M+H]+	Ethyl vanillate	0.1076	1.20515	0.521029	197.079	3.608		Benzenoids	Benzene and substituted derivatives	Benzoic acids and derivatives	C10H12O4	MWAYRGBWOVHDDZ-UHFFFAOYSA-N	CCOC(=O)C1=CC(=C(O)C=C1)OC	34607.7	46783.8	20870.5	32110.4	31427.2	21316.5
POS_2364	[M+H]+	Ethyl-4-dimethylaminobenzoate	0.0396874	1.03164	0.870682	194.119	7.579		Benzenoids	Benzene and substituted derivatives	Benzoic acids and derivatives	C11H15NO2	FZUGPQWGEGAKET-UHFFFAOYSA-N	CCOC(=O)C1=CC=C(C=C1)N(C)C	27201.9	16346	25975.1	26251.9	22625	18514
POS_8853	[M+H]+	Eupatilin	0.114026	0.877054	0.562549	345.092	2.493	C10040	Phenylpropanoids and polyketides	Flavonoids	O-methylated flavonoids	C18H16O7	DRRWBCNQOKKKOL-UHFFFAOYSA-N	COC1=C(OC)C=C(C=C1)C2=CC(=O)C3=C(O)C(=C(O)C=C3O2)OC	8758.92	9715.51	6050.29	6764.3	11778.9	9419.42
POS_12134	[M+H-H2O]+	Euphol	2.96014	2.40297	0.342233	409.38	13.817					C30H50O	CAHGCLMLTWQZNJ-UHFFFAOYSA-N	C[C@H](CCC=C(C)C)[C@@H]1CC[C@]2([C@]1(CCC3=C2CC[C@@H]4[C@@]3(CC[C@@H](C4(C)C)O)C)C)C	4.07064e+06	918248	871622	749327	809135	880401
POS_23706	[M+H]+	Exemestane	0.170418	0.729747	0.683396	615.343	9.274	C08162	Lipids and lipid-like molecules	Steroids and steroid derivatives	Androstane steroids	C20H24O2	BFYIZQONLCFLEV-DAELLWKTSA-N	CC12CCC3C(CC(=C)C4=CC(=O)C=CC34C)C1CCC2=O	5440.32	21064.7	5148.99	3868.68	28165.5	11342.5
POS_6938	[M+H]+	Fenazaquin	0.707685	0.386094	0.349765	307.187	7.158		Organoheterocyclic compounds	Diazanaphthalenes	Benzodiazines	C20H22N2O	DMYHGDXADUDKCQ-UHFFFAOYSA-N	CC(C)(C)C1=CC=C(CCOC2=NC=NC3=CC=CC=C23)C=C1	96529.7	46443.6	37654.3	42620.2	330627	94586.3
POS_9633	[M+H]+	Fenofibrate	0.0991888	0.476878	0.058619	361.113	2.164	C07586	Benzenoids	Benzene and substituted derivatives	Benzophenones	C20H21ClO4	YMTINGFKWWXKFG-UHFFFAOYSA-N	CC(C)OC(=O)C(C)(C)OC1=CC=C(C=C1)C(=O)C2=CC=C(Cl)C=C2	924.949	1272.52	654.347	1285.39	2300.44	2394.34
POS_6827	[M+H]+	Fenoterol	0.606514	0.754566	0.259419	304.155	7.886		Benzenoids	Benzene and substituted derivatives	Phenethylamines	C17H21NO4	LSLYOANBFKQKPT-UHFFFAOYSA-N	CC(CC1=CC=C(O)C=C1)NCC(O)C2=CC(=CC(=C2)O)O	167791	124694	94080.7	125204	204873	182225
POS_5398	[M+H]+	Fenpropidin	0.478034	1.08542	0.716431	274.258	8.607		Organoheterocyclic compounds	Pteridines and derivatives		C19H31N	MGNFYQILYYYUBS-UHFFFAOYSA-N	CC(CN1CCCCC1)CC2=CC=C(C=C2)C(C)(C)C	1.14583e+06	773522	762634	1.05765e+06	611858	801400
POS_6834	[M+H]+	Fenpropimorph	3.56843	1.23021	0.440995	304.26	11.333		Benzenoids	Benzene and substituted derivatives	Phenylpropanes	C20H33NO	RYAUSSKQMZRMAI-ALOPSCKCSA-N	CC(CN1CC(C)OC(C)C1)CC2=CC=C(C=C2)C(C)(C)C	2.5687e+07	3.06366e+07	1.48381e+07	2.22696e+07	2.07818e+07	1.47936e+07
POS_5909	[M+H]+	Flavokawain b	7.7699	0.712405	0.412916	285.112	8.949		Phenylpropanoids and polyketides	Linear 1,3-diarylpropanoids	Chalcones and dihydrochalcones	C17H16O4	QKQLSQLKXBHUSO-CMDGGOBGSA-N	COC1=CC(=C(C(=C1)O)C(=O)\\C=C\\C2=CC=CC=C2)OC	3.60793e+07	1.75089e+07	9.43793e+06	2.1336e+07	2.8833e+07	3.83004e+07
POS_12432	[M+H]+	Flecainide	0.207598	1.74176	0.500055	415.135	4.638	C07001	Benzenoids	Benzene and substituted derivatives	Benzoic acids and derivatives	C17H20F6N2O3	DJBNUMBKLMJRSA-UHFFFAOYSA-N	FC(F)(F)COC1=CC(=C(OCC(F)(F)F)C=C1)C(=O)NCC2CCCCN2	55949.9	64911.5	1085.67	24204.8	43988.1	1820.84
POS_12889	[M+H]+	Fludrocortisone acetate	0.179959	0.668991	0.329557	423.214	8.092	C00762	Lipids and lipid-like molecules	Steroids and steroid derivatives	Pregnane steroids	C23H31FO6	SYWHXTATXSMDSB-GSLJADNHSA-N	CC(=O)OCC(=O)[C@@]1(O)CC[C@H]2[C@@H]3CCC4=CC(=O)CC[C@]4(C)[C@@]3(F)[C@@H](O)C[C@]12C	13896.9	14062.5	3842.39	11735.6	22390.3	13411.1
POS_9333	[M+H]+	Flumioxazin	0.953266	0.817167	0.453418	355.099	2.394	C11035	Organoheterocyclic compounds	Benzoxazines	Benzoxazinones	C19H15FN2O4	FOUWCSDKDDHKQP-UHFFFAOYSA-N	FC1=CC2=C(C=C1N3C(=O)C4=C(CCCC4)C3=O)N(CC#C)C(=O)CO2	686793	480847	302708	462824	705782	630717
POS_1589	[M+H]+	Fluorene	0.082831	1.12488	0.162578	167.084	8.492		Benzenoids	Fluorenes		C13H10	NIHNNTQXNPWCJQ-UHFFFAOYSA-N	C1C2=C(C=CC=C2)C3=C1C=CC=C3	73550.9	65906.4	82109	67762.2	64543	64663.5
POS_7189	[M+Na]+	Fonsecin	0.493721	0.695161	0.520766	313.068	3.628		Organoheterocyclic compounds	Naphthopyrans	Naphthopyranones	C15H14O6	FKCYENFBFZUSDP-UHFFFAOYSA-N	COC1=C2C(=C3C(=O)CC(C)(O)OC3=CC2=CC(=C1)O)O	166855	108113	62999.1	87535.7	288389	110246
POS_13121	[M+Na]+	Fragransin B2	0.144491	0.695792	0.443507	427.156	4.569		Lignans, neolignans and related compounds	Furanoid lignans	Tetrahydrofuran lignans	C22H28O7	CAUANPLJFMVCHO-UHFFFAOYSA-N	COC1=CC(=CC(=C1O)OC)C2OC(C(C)C2C)C3=CC(=C(O)C(=C3)OC)OC	11708.6	6822.31	19958.5	19649.5	8579.1	27088.8
POS_11197	[M+H]+	Fraxin	0.0602217	0.535433	0.394293	393.079	4.125					C16H18O10	CRSFLLTWRCYNNX-YJADWKFMSA-N	COC1=C(C(=C2C(=C1)C=CC(=O)O2)O[C@H]3C([C@@H]([C@@H](C(O3)CO)O)O)O)O	453.161	1001.29	694.497	557.687	2589.55	866.239
POS_2645	[M+Na]+	Fructose (Generic Ketohexose)	1.82452	1.03882	0.953124	203.053	1.067		Organic oxygen compounds	Organooxygen compounds	Carbohydrates and carbohydrate conjugates	C6H12O6	LKDRXBCSQODPBY-UHFFFAOYSA-N	OCC1(O)OCC(O)C(O)C1O	4.34518e+06	873073	910392	1.22744e+06	2.62378e+06	2.04841e+06
POS_11370	[M+H-H2O]+	Fucosterol	0.509101	0.963175	0.777272	395.365	12.497		Lipids and lipid-like molecules	Steroids and steroid derivatives	Stigmastanes and derivatives		OSELKOCHBMDKEJ-UHFFFAOYSA-N	CC=C(CCC(C)C1CCC2C3CC=C4CC(O)CCC4(C)C3CCC12C)C(C)C	515456	709724	679886	679665	738871	559366
POS_10615	[M+Na]+	Fumiquinazoline F	0.0578588	1.1437	0.704866	381.13	4.831		Organoheterocyclic compounds	Diazanaphthalenes	Benzodiazines	C21H18N4O2	SUVZUTHVKIBYOH-KPZWWZAWSA-N	C[C@@H]1NC(=O)[C@@H](CC2=C[NH]C3=CC=CC=C23)N4C(=O)C5=CC=CC=C5N=C14	18018.7	13742.8	6057.36	13842.3	7957.19	11267.7
POS_9	[M+H]+	Furan	0.49873	1.30281	0.480874	69.0323	1.087					C4H4O	YLQBMQCUIZJEEH-UHFFFAOYSA-N	C1=COC=C1	214896	87853.5	130041	68081.4	138742	125376
POS_12219	[M+H]+	gamma-Tocotrienol	0.0671142	1.02418	0.833847	411.195	5.876	C14155	Lipids and lipid-like molecules	Prenol lipids	Quinone and hydroquinone lipids	C28H42O2	OTXNTMVVOOBZCV-WAZJVIJMSA-N	CC(C)=CCCC(C)=CCCC(C)=CCCC1(C)CCC2=CC(=C(C)C(=C2O1)C)O	15099.7	16461.8	13876.6	17573.2	13805.3	12986.9
POS_20269	[M+H]+	Ganoderic acid Mi	0.27815	0.900645	0.607303	545.383	10.781					C33H52O6	DOGNEMJACWRRLK-NDENLUEZNA-N	O=C(O)C(=CCCC(C)C1CC(O)C2(C3=C(CCC12C)C4(C)CCC(OC(=O)C)C(C)(C)C4CC3OC)C)C	93495.1	101045	71467.1	127877	90062.5	77412.5
POS_12337	[M+H]+	Gardneramine	0.0872929	1.02638	0.940358	413.211	3.356		Organoheterocyclic compounds	Indoles and derivatives	Indoles	C23H28N2O5	RIMDDIPKIZTBHU-KPDHXFAYSA-N	COC\\C=C1/CN2[C@H]3CC45C2C[C@H]1[C@@H]3COC4=NC6=C5C(=C(OC)C=C6OC)OC	12526.2	24464.1	9499.43	11249.9	18194.5	15850.3
POS_15619	[M+NH4]+	Geranyl 6-O-alpha-L-arabinofuranosyl-beta-D-glucopyranoside	0.151277	0.698679	0.211326	466.261	6.305		Lipids and lipid-like molecules	Prenol lipids	Terpene glycosides	C21H36O10	AWDKYYYAAQQLEF-XRSPUIAPSA-N	CC(C)=CCCC(C)=CCOC1OC(COC2OC(CO)C(O)C2O)C(O)C(O)C1O	3193.53	7693.77	5314.39	6235.45	9264.91	7688.68
POS_3303	[M+H]+	Germacrone	0.749381	0.858106	0.158583	219.173	7.169					C15H22O	CAULGCQHVOVVRN-SWZPTJTJSA-N	C/C/1=C\\CC(=C(C)C)C(=O)C/C(=C/CC1)/C	339588	326703	317100	321250	419295	405456
POS_14000	[M+H]+	Ginkgolide C	0.172294	0.831676	0.705307	441.139	3.454					C20H24O11	AMOGMTLMADGEOQ-UHFFFAOYNA-N	O=C1OC2OC34C(=O)OC5C(O)C(C(C)(C)C)C2(C1O)C54C(O)C6OC(=O)C(C)C63O	28484.7	24985.9	14462.5	13910.8	47864.6	19906.9
POS_31137	[M+H]+	Ginsenoside Rk1	0.185844	0.369532	0.0191967	789.473	11.427					C42H70O12	KWDWBAISZWOAHD-MHOSXIPRSA-N	CC(=CCCC(=C)[C@H]1CC[C@@]2([C@@H]1[C@@H](C[C@H]3[C@]2(CC[C@@H]4[C@@]3(CC[C@@H](C4(C)C)O[C@H]5[C@@H]([C@H]([C@@H]([C@H](O5)CO)O)O)O[C@H]6[C@@H]([C@H]([C@@H]([C@H](O6)CO)O)O)O)C)C)O)C)C	952.981	3134.48	2384.56	4870.9	5376.64	7266.6
POS_8424	[M+H]+	Glabrone	0.307327	0.790092	0.414023	337.101	8.158		Phenylpropanoids and polyketides	Isoflavonoids	Pyranoisoflavonoids	C20H16O5	COLMVFWKLOZOOP-UHFFFAOYSA-N	CC1(C)OC2=C(C=C1)C(=C(C=C2)C3=COC4=CC(=CC=C4C3=O)O)O	63565.5	42625.6	25072.8	43840.7	56943.9	65352.9
POS_3876	[M+H]+	Glomellin	0.358958	0.855914	0.477622	235.095	6.006		Phenylpropanoids and polyketides	Isocoumarins and derivatives		C13H14O4	WTYWMHXEEXFHAD-UHFFFAOYSA-N	CCCC1=CC2=C(C(=CC(=C2)OC)O)C(=O)O1	74427.3	91358.4	49083.2	76060.9	72795.3	102184
POS_994	[M+H]+	Glutamine Analogue, 1	0.589079	0.237388	0.0405949	147.064	1.057		Organic acids and derivatives	Carboxylic acids and derivatives	Amino acids, peptides, and analogues	C5H10N2O3	ZDXPYRJPNDTMRX-UHFFFAOYSA-N	NC(CCC(N)=O)C(O)=O	376.607	23713.1	10779.5	33948.4	43658.2	69280.4
POS_9484	[M+H]+	Glyceryl monooleate	0.315799	1.02605	0.927857	357.302	11.457		Lipids and lipid-like molecules	Glycerolipids	Monoradylglycerols	C21H40O4	RZRNAYUHWVFMIP-KTKRTIGZSA-N	CCCCCCCCC=CCCCCCCCC(=O)OCC(O)CO	143406	81254.3	71327.9	70308.5	109398	108765
POS_9591	[M+H]+	Glyceryl monostearate	3.94311	0.98088	0.846165	359.315	11.871		Lipids and lipid-like molecules	Glycerolipids	Monoradylglycerols	C21H42O4	VBICKXHEKHSIBG-UHFFFAOYSA-N	CCCCCCCCCCCCCCCCCC(=O)OCC(O)CO	5.59616e+07	4.48407e+07	4.67069e+07	4.90773e+07	4.53565e+07	5.59507e+07
POS_9025	[M+NH4]+	Glyceryl palmitate	0.880211	0.947218	0.714241	348.308	11.387		Lipids and lipid-like molecules	Glycerolipids	Monoradylglycerols	C19H38O4	QHZLMUACJMDIAE-UHFFFAOYSA-N	CCCCCCCCCCCCCCCC(=O)OCC(O)CO	2.24166e+06	1.58938e+06	1.97968e+06	1.98243e+06	1.73633e+06	2.41575e+06
POS_12398	[M+H]+	Gnoscopine	0.26646	0.670734	0.524577	414.167	7.544		Alkaloids and derivatives	Phthalide isoquinolines		C22H23NO7	AKNNEGZIBPJZJG-UHFFFAOYSA-N	COC1=C(OC)C2=C(C=C1)C(OC2=O)C3N(C)CCC4=CC5=C(OCO5)C(=C34)OC	6077.45	25267	45499.7	35103.3	15595.3	63868.7
POS_25976	[M+Na]+	Goshonoside F5	0.0481859	1.33706	0.316897	669.341	8.618		Lipids and lipid-like molecules	Prenol lipids	Terpene glycosides	C32H54O13	QIOMMMCQFIBVKA-PPQBIMEKSA-N	CC(CCC1C(=C)CCC2C(C)(COC3OC(CO)C(O)C(O)C3O)C(O)CCC12C)=CCOC4OC(CO)C(O)C(O)C4O	2912.8	2659.4	1474.17	1576.43	2284.16	1409.47
POS_6698	[M+H]+	Grandiflorenic Acid	0.347143	6.29668	0.314704	301.216	10.028		Lipids and lipid-like molecules	Prenol lipids	Diterpenoids	C20H28O2	RJIPNPHMQGDUBW-LGEIONFXSA-N	CC1(CCCC2(C)C1CCC34CC(CC=C23)C(=C)C4)C(O)=O	10888.8	183798	29952.5	6679.22	17948.4	11048.2
POS_1181	[M+H]+	Guanine	0.209175	0.724188	0.529559	152.055	1.257		Organoheterocyclic compounds	Imidazopyrimidines	Purines and purine derivatives	C5H5N5O	UYTPUPDQBNUYGX-UHFFFAOYSA-N	OC1=NC(=N)NC2=C1N=C[NH]2	102.703	20318.9	16568.8	14829.9	13574	22674.6
POS_6950	[M+H]+	h_61_17_Epioxandrolone	0.490738	0.501158	0.0426869	307.225	10.088		Lipids and lipid-like molecules	Steroids and steroid derivatives	Steroid lactones	C19H30O3	QSLJIVKCVHQPLV-ZXOYHYBESA-N	C[C@@]1(O)CCC2C3CCC4CC(=O)OC[C@]4(C)C3CC[C@]12C	47779.1	34911.6	29675.2	67963	97191	59058.3
POS_6236	[M+H]+	h_92_Oxabolone	0.162515	0.987666	0.979132	291.195	6.948		Lipids and lipid-like molecules	Steroids and steroid derivatives	Estrane steroids	C18H26O3	GXHBCWCMYVTJOW-DNBWYCQVSA-N	C[C@]12CCC3C(CCC4=C(O)C(=O)CCC34)C1CC[C@@H]2O	4046.84	30301.5	22409	24844.8	19550.8	13070.5
POS_13412	[M+H]+	Hecogenin	0.948302	0.87041	0.54136	431.313	10.368	C08902	Lipids and lipid-like molecules	Prenol lipids	Triterpenoids	C27H42O4	QOLRLLFJMZLYQJ-LOBDNJQFSA-N	CC1CCC2(OC1)OC3CC4C5CCC6CC(O)CCC6(C)C5CC(=O)C4(C)C3C2C	881547	954800	712093	786844	1.32661e+06	814405
POS_12335	[M+Na]+	Hexa(methoxymethyl)melamine	0.122714	1.3892	0.679857	413.209	6.692		Organic nitrogen compounds	Organonitrogen compounds	Amines	C15H30N6O6	BNCADMBVWNPPIZ-UHFFFAOYSA-N	COCN(COC)C1=NC(=NC(=N1)N(COC)COC)N(COC)COC	3353.91	11411.2	3210.97	9580.92	1640.73	1718.31
POS_2410	[M+H]+	Hexylresorcinol	0.58585	1.03872	0.919507	195.123	2.489		Benzenoids	Phenols	Benzenediols	C12H18O2	WFJIVOKAWHGMBH-UHFFFAOYSA-N	CCCCCCC1=CC=C(O)C=C1O	185352	289027	298380	410985	171966	161006
POS_10049	[M+H]+	Hirsutine	0.1931	0.375447	0.372607	369.235	6.208					C22H28N2O3	NMLUOJBSAYAYEM-GZRFBZBPSA-N	CC[C@H]1CN2CCC3=C([C@H]2C[C@@H]1C(=COC)C(=O)OC)NC4=CC=CC=C34	5504.51	2639.46	2908.12	6162.21	1662.67	21612.3
POS_242	[M+H]+	Histamine	0.172939	1.7978	0.234362	112.086	1.26	C00388	Organic nitrogen compounds	Organonitrogen compounds	Amines	C5H9N3	NTYJJOPFIAHURM-UHFFFAOYSA-N	NCCC1=CN=C[NH]1	15253.9	4259.64	11780.1	4664.16	5835.04	6907.41
POS_9049	[M+H]+	Histidine-betaxanthin	0.164666	0.703061	0.405165	349.146	2.697					C15H16N4O6	OROLDOQHKPWCGQ-JQWIXIFHSA-N	C1[C@H](N=C(C=C1C=C[N+]2=CNC(=C2)C[C@@H](C(=O)[O-])N)C(=O)O)C(=O)O	1102.02	11013.4	13331.2	12450.9	10374.1	13369
POS_14398	[M+Na]+	HT-2 Toxin	0.387886	0.803305	0.553112	447.181	3.834		Lipids and lipid-like molecules	Prenol lipids	Sesquiterpenoids	C22H32O8	PNKLMTPXERFKEN-MLXHEQMXSA-N	CC(C)CC(=O)O[C@H]1C[C@@]2(COC(C)=O)[C@H](O[C@@H]3[C@H](O)[C@@H](O)[C@@]2(C)[C@]34CO4)C=C1C	36924.3	102593	44776.6	60323	96451.6	72644.7
POS_4725	[M+H]+	Huperzine B	0.197729	0.853202	0.776134	257.163	4.412					C16H20N2O	YYWGABLTRMRUIT-HWWQOWPSSA-N	CC1=C[C@H]2CC3=C(C=CC(=O)N3)[C@@]4(C1)[C@@H]2CCCN4	803.918	46067.8	47924.9	31126.2	54818.3	25162.4
POS_6467	[M+H]+	Hydrocinchonine	0.159225	1.39427	0.366118	297.202	4.578		Alkaloids and derivatives	Cinchona alkaloids		C19H24N2O	WFJNHVWTKZUUTR-UHFFFAOYSA-N	CCC1CN2CCC1CC2C(O)C3=CC=NC4=CC=CC=C34	16998.2	34806.4	39693.9	30567.4	13547.2	21510
POS_9753	[M+H]+	Hydrocortisone	0.421794	0.518505	0.1427	363.213	8.173	C00735	Lipids and lipid-like molecules	Steroids and steroid derivatives	Hydroxysteroids	C21H30O5	JYGXADMDTFJGBT-VWUMJDOOSA-N	CC12CCC(=O)C=C1CCC3C4CCC(O)(C(=O)CO)C4(C)CC(O)C23	6629.4	35319	19133.7	38022.4	29151.8	50630
POS_1827	[M+H]+	Hymecromone	0.196832	0.976389	0.871596	177.053	6.803	C03081	Phenylpropanoids and polyketides	Coumarins and derivatives	Hydroxycoumarins	C10H8O3	HSHNITRMYYLLCV-UHFFFAOYSA-N	CC1=CC(=O)OC2=C1C=CC(=C2)O	44267.2	45397.9	36823.7	32697.7	49399.2	47450.6
POS_16774	[M+Na]+	Hyperoside	0.483748	0.997952	0.998058	487.086	4.904	C10073	Phenylpropanoids and polyketides	Flavonoids	Flavonoid glycosides		OVSQVDMCBVZWGM-DTGCRPNFSA-N	OCC1OC(OC2=C(OC3=C(C(=CC(=C3)O)O)C2=O)C4=CC(=C(O)C=C4)O)C(O)C(O)C1O	944680	146630	85723.3	670268	306526	202655
POS_11027	[M+H]+	Icariside B5	0.12075	0.890835	0.703977	389.216	5.022		Lipids and lipid-like molecules	Fatty Acyls	Fatty acyl glycosides	C19H32O8	CZYPGTRKJFYXLT-SUHXYMONSA-N	C[C@H](CC[C@@]1(O)C(=CC(=O)CC1(C)C)C)O[C@@H]2O[C@H](CO)[C@@H](O)[C@H](O)[C@H]2O	4535.92	13347.1	8368.52	8797.16	9714.45	10956.9
POS_12718	[M+NH4]+	Icariside F2	0.653079	0.970053	0.941008	420.185	3.826		Organic oxygen compounds	Organooxygen compounds	Carbohydrates and carbohydrate conjugates	C18H26O10	NJMQSVWMCODQIP-FQXXIRCGSA-N	OC[C@@]1(O)CO[C@@H](OC[C@H]2O[C@@H](OCC3=CC=CC=C3)[C@H](O)[C@@H](O)[C@@H]2O)[C@@H]1O	447421	910231	292053	380099	759339	561198
POS_5440	[M+Na]+	Ilicic acid	0.300865	1.04317	0.907395	275.157	8.004		Lipids and lipid-like molecules	Prenol lipids	Sesquiterpenoids	C15H24O3	FXKCXGBBUBCRPU-QHSBEEBCSA-N	C[C@@]1(O)CCC[C@]2(C)CC[C@H](C[C@@H]12)C(=C)C(O)=O	402137	169037	200659	324511	248077	167300
POS_13252	[M+Na]+	Ilicicolin C	0.101994	1.06871	0.572889	429.186	5.715		Organic oxygen compounds	Organooxygen compounds	Carbonyl compounds	C23H31ClO4	IJEHYEVNWOYGMS-WGUBEYSISA-N	C[C@@H]1CCC(=O)[C@H](C)[C@@]1(C)CC\\C(C)=C\\CC2=C(O)C(=C(C)C(=C2O)Cl)C=O	49760.7	52872.2	57868.7	60165.3	46054.7	43962
POS_4657	[M+H]+	Imidacloprid	0.0191516	1.84506	0.453096	256.058	4.097		Organic nitrogen compounds	Organonitrogen compounds	Guanidines	C9H10ClN5O2	YWTYJOPNNQFBPC-UHFFFAOYSA-N	[O-][N+](=O)NC1=NCCN1CC2=CN=C(Cl)C=C2	38.2522	427.821	199.74	208.498	47.4138	104.951
POS_9061	[M+H]+	Imidocarb	0.137248	0.94398	0.867633	349.183	3.677		Benzenoids	Benzene and substituted derivatives	N-phenylureas	C19H20N6O	SCEVFJUWLLRELN-UHFFFAOYSA-N	O=C(NC1=CC(=CC=C1)C2=NCCN2)NC3=CC(=CC=C3)C4=NCCN4	16459.3	19036	12916.2	27193.1	13168.1	10923.3
POS_1818	[M+H]+	Indole-3-acetic acid	0.173473	1.57809	0.340682	176.071	1.226	C00954	Organoheterocyclic compounds	Indoles and derivatives	Indolyl carboxylic acids and derivatives	C10H9NO2	SEOVTRFCIGRIMH-UHFFFAOYSA-N	OC(=O)CC1=C[NH]C2=C1C=CC=C2	18127.4	51033.6	69189.5	30906.4	36201.5	20562
POS_13273	[M+H]+	Irbesartan	0.753658	0.806332	0.181024	429.244	6.3	C07469	Benzenoids	Benzene and substituted derivatives	Biphenyls and derivatives	C25H28N6O	YOSHYTLCDANDAN-UHFFFAOYSA-N	CCCCC1=NC2(CCCC2)C(=O)N1CC3=CC=C(C=C3)C4=CC=CC=C4C5=N[NH]N=N5	187216	268794	234433	260756	260765	334756
POS_12217	[M+Na]+	Isoapetalic acid	0.117513	0.463594	0.299324	411.178	6.638		Organoheterocyclic compounds	Benzopyrans	1-benzopyrans	C22H28O6	JZWLSXINEVHWEP-UHFFFAOYSA-N	CCCC(CC(O)=O)C1=C2OC(C)C(C)C(=O)C2=C(O)C3=C1OC(C)(C)C=C3	1552.38	3801.23	2457.26	4567.29	10272.5	2008.7
POS_103	[M+H]+	Isobutyric acid	0.0384143	0.868981	0.734899	89.0595	1.643	C02632	Organic acids and derivatives	Carboxylic acids and derivatives	Carboxylic acids	C4H8O2	KQNPFQTWMSNSAP-UHFFFAOYSA-N	CC(C)C(O)=O	22057.5	7674.36	8982.05	16653.2	18470	9427.72
POS_33004	[M+H]+	Isobutyryl CoA	0.360044	0.950141	0.73093	838.634	13.622		Lipids and lipid-like molecules	Fatty Acyls	Fatty acyl thioesters	C25H42N7O17P3S	AEWHYWSPVRZHCT-NNYIDDMCSA-N	CC(C)C(=O)SCCNC(=O)CCNC(=O)C(O)C(C)(C)CO[P](O)(=O)O[P](O)(=O)OCC1OC(C(O)C1O[P](O)(O)=O)[N]2C=NC3=C2N=CN=C3N	2.17644e+06	1.49679e+06	2.22053e+06	2.17821e+06	2.25853e+06	1.76629e+06
POS_10722	[M+H]+	Isocorynoxeine	0.057661	0.943392	0.747868	383.189	4.282					C22H26N2O4	MUVGVMUWMAGNSY-VKCGGMIFSA-N	CO/C=C(\\[C@H]1C[C@H]2[C@]3(CCN2C[C@@H]1C=C)C4=CC=CC=C4NC3=O)/C(=O)OC	3470.94	5282.42	4231.82	5288.98	4951.88	3523.49
POS_2833	[M+H]+	Isoeugenitol	0.274443	0.847661	0.437455	207.064	9.122		Organoheterocyclic compounds	Benzopyrans	1-benzopyrans	C11H10O4	XSSGQRFNGHRFBC-UHFFFAOYSA-N	CC1=CC(=O)C2=C(O1)C(=C(O)C=C2O)C	50922.5	62396.8	54271.5	68983.2	45249.9	83476.5
POS_21453	[M+H]+	Isoginkgetin	0.084704	0.605697	0.395833	567.122	4.273					C32H22O10	HUOOMAOYXQFIDQ-UHFFFAOYSA-N	COC1=CC=C(C=C1)C2=CC(=O)C3=C(O2)C(=C(C=C3O)O)C4=C(C=CC(=C4)C5=CC(=O)C6=C(C=C(C=C6O5)O)O)OC	11.939	2520.95	2396.38	3655	3307.69	1175.49
POS_20569	[M+H]+	Isogomphrenin I	0.233804	1.29294	0.448362	551.304	6.532		Organic oxygen compounds	Organooxygen compounds	Carbohydrates and carbohydrate conjugates	C24H26N2O13	IKCBLEDGTPAJDE-VRFZYHLASA-N	OCC1OC(OC2=C(O)C=C3CC(N(C=CC4=CC(=NC(C4)C(O)=O)C(O)=O)C3=C2)C(O)=O)C(O)C(O)C1O	69171.3	192070	169947	125830	96099.8	111564
POS_25296	[M+H]+	Isohernandezine	0.149113	0.783298	0.635229	653.31	7.054		Phenylpropanoids and polyketides	Tannins		C39H44N2O7	FUZMQNZACIFDBL-IHLOFXLRSA-N	COC1=C2OC3=CC=C(C[C@H]4N(C)CCC5=CC(=C(OC6=C(OC)C(=C(OC)C7=C6[C@H](CC(=C2)C=C1)N(C)CC7)OC)C=C45)OC)C=C3	570.939	13553.2	7042.36	9104.82	7794.45	10123
POS_13249	[M+Na]+	Isolupalbigenin	0.214546	0.920609	0.803454	429.17	3.871		Phenylpropanoids and polyketides	Isoflavonoids	Isoflav-2-enes	C25H26O5	FXJPTJQFJYNFKC-UHFFFAOYSA-N	CC(C)=CCC1=C(O)C=CC(=C1)C2=COC3=C(CC=C(C)C)C(=CC(=C3C2=O)O)O	63349.5	41375.3	20802.9	33926.5	51563.4	50862.9
POS_810	[M+H]+	Isophorone	0.10465	0.816217	0.556609	139.109	8	C14743	Organic oxygen compounds	Organooxygen compounds	Carbonyl compounds	C9H14O	HJOVHMDZYOCNQW-UHFFFAOYSA-N	CC1=CC(=O)CC(C)(C)C1	37445.2	15972.3	58146	48295.1	52079.6	36309.1
POS_2308	[M+H]+	Isoscopoletin	0.0780102	0.946309	0.788186	193.047	4.252					C10H8O4	SYTYLPHCLSSCOJ-UHFFFAOYSA-N	COC1=C(C=C2C=CC(=O)OC2=C1)O	7901.05	9791.83	4802.45	7401.39	8360.66	8009.59
POS_1209	[M+H]+	Isovanillin	0.106805	1.16129	0.848373	153.055	3.915					C8H8O3	JVTZFYYHCGSXJV-UHFFFAOYSA-N	COC1=C(C=C(C=C1)C=O)O	1536.33	38387.6	9839.18	11263.1	14240	17348.5
POS_3399	[M-H2O+H]+	Jaeschkeanadiol	1.71087	0.555928	0.204113	221.188	6.55		Lipids and lipid-like molecules	Prenol lipids	Sesquiterpenoids	C15H26O2	SUAPQGLGNKUSLY-LJISPDSOSA-N	CC(C)C1(O)CCC2(C)CC=C(C)CC(O)C12	44659.5	638816	445519	490386	774249	766196
POS_12532	[M+K]+	Jamaicin	0.017085	0.794585	0.691886	417.076	3.05		Phenylpropanoids and polyketides	Isoflavonoids	Pyranoisoflavonoids	C22H18O6	WITLAWYGGVAFLU-UHFFFAOYSA-N	COC1=C(C=C2OCOC2=C1)C3=COC4=C(C=CC5=C4C=CC(C)(C)O5)C3=O	129.901	166.495	55.5569	39.5069	258.501	144.933
POS_22513	[M+Na]+	Jaslanceoside B	0.0444413	0.66913	0.5395	589.151	3.541		Lipids and lipid-like molecules	Prenol lipids	Terpene glycosides	C26H30O14	MGEVYVDQMTWJNV-HOPHSATRSA-N	COC(=O)CC1C(=CCOC(=O)C=CC2=CC=C(O)C=C2)C(OC=C1C(O)=O)OC3OC(CO)C(O)C(O)C3O	20.2516	1077.41	279.239	645.126	904.434	508.182
POS_1990	[M+H]+	Jasmolone	0.229257	1.07349	0.733708	181.12	6.879					C11H16O2	SVRKACAGHUZSGU-SNAWJCMRNA-N	O=C1C(=C(C)C(O)C1)CC=CCC	145647	218427	133531	174022	167384	122134
POS_10482	[M+NH4]+	Junipediol A 8-glucoside	0.0528679	0.868717	0.619581	378.174	3.044		Organic oxygen compounds	Organooxygen compounds	Carbohydrates and carbohydrate conjugates	C16H24O9	REHZVRNVHQFBAF-YLHHEPAUSA-N	COC1=CC(=CC=C1O)C(CO)COC2OC(CO)C(O)C(O)C2O	6063.9	5642.81	2085.45	5656.87	5484.43	4735.16
POS_29664	[M+H]+	Kaempferol 3-rutinoside 4'-glucoside	0.0126261	1.0802	0.904958	757.216	5.031		Phenylpropanoids and polyketides	Flavonoids	Flavonoid glycosides	C33H40O20	FYJOVKRHRUYSLY-QDSFYBSMSA-N	CC1OC(OCC2OC(OC3=C(OC4=C(C(=CC(=C4)O)O)C3=O)C5=CC=C(OC6OC(CO)C(O)C(O)C6O)C=C5)C(O)C(O)C2O)C(O)C(O)C1O	486.486	198.842	70.142	390.861	181.994	126.524
POS_6263	[M+H]+	Karanjin	0.232444	0.766672	0.399427	293.078	8.557		Phenylpropanoids and polyketides	Flavonoids	Flavones	C18H12O4	LKPQNZRGGNOPPU-UHFFFAOYSA-N	COC1=C(OC2=C(C=CC3=C2C=CO3)C1=O)C4=CC=CC=C4	32756.4	15184.8	18341.9	19644.7	34789.9	32021
POS_28185	[M+H]+	Khasianine	0.254809	0.987214	0.963617	722.456	11.167					C39H63NO11	KRQDMAXNTWLTDZ-QRLCHWRASA-N	C[C@@H]1CC[C@]2([C@H]([C@H]3[C@@H](O2)C[C@@H]4[C@@]3(CC[C@H]5[C@H]4CC=C6[C@@]5(CC[C@H](C6)O[C@H]7[C@@H]([C@H]([C@@H]([C@H](O7)CO)O[C@H]8[C@@H]([C@@H]([C@H]([C@@H](O8)C)O)O)O)O)O)C)C)C)NC1	87544.6	76248.2	44961.1	45990.1	92623.1	72844.5
POS_5768	[M+Na]+	Khellin	0.0185542	1.021	0.951261	283.059	6.761	C09010	Organoheterocyclic compounds	Benzopyrans	1-benzopyrans	C14H12O5	HSMPDPBYAYSOBC-UHFFFAOYSA-N	COC1=C2OC=CC2=C(OC)C3=C1OC(=CC3=O)C	299.586	972.293	707.818	532.881	781.345	624.752
POS_12068	[M+H]+	Khelloside	0.504466	0.493719	0.119493	409.109	3.048		Organoheterocyclic compounds	Benzopyrans	1-benzopyrans	C19H20O10	SJRACCTZSAUMGO-WIMVFMHDSA-N	COC1=C2C=COC2=CC3=C1C(=O)C=C(COC4OC(CO)C(O)C(O)C4O)O3	1568.7	46340.2	34957.3	51110.4	65986.2	50744.3
POS_6869	[M+Na]+	Koninginin E	0.341544	0.970459	0.861601	305.171	7.064		Organoheterocyclic compounds	Benzopyrans		C16H26O4	INHVGPIPHZJQOP-ZNMIVQPWSA-N	CCCCCC[C@H](O)[C@@H]1CCC2=C(O1)[C@H](O)CCC2=O	131666	227039	205755	208206	172985	200452
POS_6940	[M+H]+	Koumine	0.452093	0.739494	0.229814	307.189	6.738		Organoheterocyclic compounds	Indoles and derivatives	Indoles	C20H22N2O	VTLYEMHGPMGUOT-XMHJOAAQSA-N	CN1C[C@@]2(C=C)[C@@H]3C[C@@H]4OC[C@@H]3[C@@H]1C[C@]25C4=NC6=CC=CC=C56	105677	68577.6	62680.1	94724.4	90341.6	135335
POS_7270	[M+H]+	Kresoxim-Methyl	0.0421391	0.665847	0.191105	314.138	9.513		Benzenoids	Phenol ethers		C18H19NO4	ZOTBXTZVPHCKPN-HTXNQAPBSA-N	CO\\N=C(C(=O)OC)/C1=C(COC2=C(C)C=CC=C2)C=CC=C1	498.888	576.011	556.193	641.98	1160.64	647.032
POS_30880	[M+Na]+	Kuwanone H	0.0692897	0.376309	0.0534447	783.284	5.925		Phenylpropanoids and polyketides	Flavonoids	Flavones		DKBPTKFKCCNXNH-QXGWMLRCSA-N	CC(C)=CCC1=C(O)C=CC(=C1O)C(=O)[C@H]2[C@@H](CC(=C[C@@H]2C3=C(O)C=C(O)C4=C3OC(=C(CC=C(C)C)C4=O)C5=C(O)C=C(O)C=C5)C)C6=C(O)C=C(O)C=C6	602.763	551.518	272.117	1186.87	1767.95	835.675
POS_23621	[M+H]+	L-Glutathione (oxidized form)	1.40914	0.721023	0.475272	613.476	13.529		Organic acids and derivatives	Carboxylic acids and derivatives	Amino acids, peptides, and analogues	C20H32N6O12S2	YPZRWBKMTBYPTK-BJDJZHNGSA-N	NC(CCC(O)=NC(CSSCC(N=C(O)CCC(N)C(O)=O)C(O)=NCC(O)=O)C(O)=NCC(O)=O)C(O)=O	73491.1	910360	1.19175e+06	1.24481e+06	874938	897638
POS_629	[M+H]+	l-Isoleucine	0.0784475	1.14376	0.854355	132.102	1.522	C00407	Organic acids and derivatives	Carboxylic acids and derivatives	Amino acids, peptides, and analogues	C6H13NO2	AGPKZVBTJJNPAG-WHFBIAKZSA-N	CCC(C)C(N)C(O)=O	8780.01	3215.49	699.423	2117.01	2709.47	6272.78
POS_28419	[M+H]+	Lampranthin II	0.14315	2.82731	0.0560316	727.34	7.978		Alkaloids and derivatives	Betalains	Betacyanins and derivatives	C34H34N2O16	BRMDRKOAVZEJCS-WPUGSIMNSA-N	COC1=CC(=CC=C1[O-])C=CC(=O)OCC2OC(OC3=C(O)C=C4C(=C3)CC(C(O)=O)[N+]4=CC=C5CC(NC(=C5)C(O)=O)C(O)=O)C(O)C(O)C2O	5744.89	3959.05	2413.8	1624.61	1592.71	1068.63
POS_8812	[M]+	Lauramidopropylbetaine	0.124531	1.08045	0.647176	343.29	9.022		Organic acids and derivatives	Carboxylic acids and derivatives	Amino acids, peptides, and analogues	[C19H39N2O3]+	MRUAUOIMASANKQ-UHFFFAOYSA-O	CCCCCCCCCCCC(=O)NCCC[N+](C)(C)CC(O)=O	44621.7	30206.7	28512.7	30411.1	31677.4	33557.6
POS_6110	[M+H]+	Lauryl diethanolamide	0.418115	0.570246	0.217739	288.249	9.329		Lipids and lipid-like molecules	Fatty Acyls	Fatty amides	C16H33NO3	AOMUHOFOVNGZAN-UHFFFAOYSA-N	CCCCCCCCCCCC(=O)N(CCO)CCO	7211.95	42815.8	30522.7	33443.2	64329.9	43482.5
POS_13118	[M+H]+	Leupeptin	0.140576	0.803098	0.661981	427.131	4.415		Organic acids and derivatives	Carboxylic acids and derivatives	Amino acids, peptides, and analogues	C20H38N6O4	GDBQQVLCIARPGH-CGZBRXJRSA-N	CC(C)CC(NC(C)=O)C(=O)NC(CC(C)C)C(=O)NC(CCCN=C(N)N)C=O	15240.9	6672.19	5490.82	5278.01	17821.9	11022.8
POS_1422	[M+H]+	Levocarnitine	0.854555	0.591034	0.392731	162.113	1.113	C00318	Organic nitrogen compounds	Organonitrogen compounds	Quaternary ammonium salts	C7H15NO3	PHIQHXFUZVPYII-ZCFIWIBFSA-N	C[N+](C)(C)CC(O)CC([O-])=O	227617	95873	40156.9	75558.6	235359	304355
POS_1450	[M+H]+	Levoglucosan	0.149175	0.776416	0.546033	163.059	2.771		Organoheterocyclic compounds	Oxepanes		C6H10O5	TWNIBLMWSKIRAT-VFUOTHLCSA-N	O[C@H]1[C@H](O)[C@H]2CO[C@H](O2)[C@@H]1O	1504.98	12434	7818.66	9091.66	9396.72	9534.86
POS_8931	[M+H]+	Limocitrin	0.247102	1.05742	0.92948	347.077	5.286		Phenylpropanoids and polyketides	Flavonoids	Flavones	C17H14O8	IBXCKSUZOFKGSB-UHFFFAOYSA-N	COC1=C(O)C=CC(=C1)C2=C(O)C(=O)C3=C(O2)C(=C(O)C=C3O)OC	113639	40036.6	11828.7	37514	69980.7	49022.6
POS_18923	[M+Na]+	Lividic acid	0.0564109	0.664346	0.490922	523.185	2.538		Phenylpropanoids and polyketides	Depsides and depsidones		C27H32O9	YFNNJORBJZUGCV-UHFFFAOYSA-N	CCCCCC(=O)CC1=C2C(=O)OC3=C(OC2=C(O)C(=C1)OC)C(=C(C(O)=O)C(=C3)O)CCCCC	29.2162	1557.82	673.612	949.033	1605.24	848.547
POS_4781	[M+H]+	Lofexidine	0.416089	0.368821	0.427011	259.044	1.462		Benzenoids	Benzene and substituted derivatives	Halobenzenes	C11H12Cl2N2O	KSMAGQUYOIHWFS-UHFFFAOYSA-N	CC(OC1=C(Cl)C=CC=C1Cl)C2=NCCN2	2752.41	39325.3	13325.7	8778.64	117713	23726
POS_2459	[M+H]+	Loliolide	0.654305	0.717246	0.571527	197.116	4.344		Organoheterocyclic compounds	Benzofurans		C11H16O3	XEVQXKKKAVVSMW-WRWORJQWSA-N	CC1(C)C[C@H](O)C[C@@]2(C)OC(=O)C=C12	12443	223070	73858.9	101726	159436	170172
POS_10713	[M+H]+	Loratadine	0.287612	1.48137	0.136201	383.147	5.314	C06818	Organoheterocyclic compounds	Benzocycloheptapyridines		C22H23ClN2O2	JCCNYMKQOSZNPW-UHFFFAOYSA-N	CCOC(=O)N1CCC(CC1)=C2C3=C(CCC4=C2N=CC=C4)C=C(Cl)C=C3	88754.2	125112	76692.3	54709.8	82422.7	59008.6
POS_13052	[M+H]+	Lupenone	1.63393	2.82184	0.321167	425.374	14.12					C30H48O	GRBHNQFQFHLCHO-FVLNLSKLSA-N	CC(=C)C1CC[C@]2(C1C3CCC4[C@]5(CCC(=O)C(C5CC[C@]4([C@@]3(CC2)C)C)(C)C)C)C	1.14969e+06	255861	206794	164733	206300	200346
POS_20596	[M+H-H2O]+	Lutein	0.849385	1.31486	0.14583	551.423	12.392		Lipids and lipid-like molecules	Prenol lipids	Tetraterpenoids		KBPHJBAIARWVSC-UHFFFAOYSA-N	CC(=CC=CC=C(C)C=CC=C(C)C=CC1=C(C)CC(O)CC1(C)C)C=CC=C(C)C=CC2C(=CC(O)CC2(C)C)C	922525	1.39303e+06	1.29738e+06	1.04298e+06	905835	798951
POS_14505	[M+H]+	Luteolin 7-galactoside	0.253301	1.04021	0.961481	449.107	2.527		Phenylpropanoids and polyketides	Flavonoids	Flavonoid glycosides	C21H20O11	PEFNSGRTCBGNAN-UHFFFAOYSA-N	OCC1OC(OC2=CC(=C3C(=O)C=C(OC3=C2)C4=CC(=C(O)C=C4)O)O)C(O)C(O)C1O	89728.9	16631.1	11200.4	18722.7	67511.8	26781.2
POS_22774	[M+H]+	Luteolin 7-O-rutinoside	0.117356	0.44063	0.156893	595.168	4.094		Phenylpropanoids and polyketides	Flavonoids	Flavonoid glycosides	C27H30O15	MGYBYJXAXUBTQF-FOBVWLSUSA-N	CC1OC(OCC2OC(OC3=CC(=C4C(=O)C=C(OC4=C3)C5=CC(=C(O)C=C5)O)O)C(O)C(O)C2O)C(O)C(O)C1O	1886.08	2676.21	562.89	4754.53	1722.45	5154.5
POS_18346	[M+H]+	Lyalosidic acid	0.382237	11.8049	0.397238	513.189	6.416		Lipids and lipid-like molecules	Prenol lipids	Terpene glycosides	C26H28N2O9	UZLBTLIRYSYTRG-FMKZDVGKSA-N	OC[C@H]1O[C@@H](O[C@@H]2OC=C([C@H](CC3=NC=CC4=C3[NH]C5=CC=CC=C45)[C@H]2C=C)C(O)=O)[C@H](O)[C@@H](O)[C@@H]1O	59386.1	320.425	1045.31	1580.68	2317.79	1247.84
POS_21902	[M+Na]+	Lyoniside	0.157357	1.65994	0.428053	575.207	4.708		Lignans, neolignans and related compounds	Lignan glycosides		C27H36O12	GWDZRGQRNHELQM-UHFFFAOYSA-N	COC1=C(O)C(=CC(=C1)C2C(COC3OCC(O)C(O)C3O)C(CO)CC4=CC(=C(O)C(=C24)OC)OC)OC	17160.1	6545.62	3706.88	5108.31	6478.5	4927.38
POS_13261	[M+H]+	Majdine	0.14621	1.36986	0.728039	429.208	5.81		Organoheterocyclic compounds	Indolizidines		C23H28N2O6	TTZWEOINXHJHCY-UHJVZONPSA-N	COC(=O)C1=CO[C@@H](C)[C@@H]2CN3CC[C@@]4([C@@H]3C[C@H]12)C(=NC5=C4C=CC(=C5OC)OC)O	21757.5	2617.54	2428.48	5003.24	6660.95	7902.33
POS_7289	[M+H]+	Malaoxon	0.518393	0.771964	0.8413	315.066	5.953	C07498	Lipids and lipid-like molecules	Fatty Acyls	Fatty acid esters	C10H19O7PS	WSORODGWGUUOBO-UHFFFAOYSA-N	CCOC(=O)CC(S[P](=O)(OC)OC)C(=O)OCC	392.114	81372.3	47868.8	165865	1395.44	665.87
POS_288	[M+H]+	Maleamic acid	0.436317	1.64445	0.642086	116.049	9.257		Lipids and lipid-like molecules	Fatty Acyls	Fatty acids and conjugates	C4H5NO3	FSQQTNAZHBEJLS-UPHRSURJSA-N	OC(=N)C=CC(O)=O	382.836	71991.9	101662	103039	1588.06	1204.93
POS_482	[M+H]+	Maltol	0.289582	0.506809	0.0660192	127.038	2.29	C11918	Organoheterocyclic compounds	Pyrans	Pyranones and derivatives	C6H6O3	XPCTZQVDEJYUGT-UHFFFAOYSA-N	CC1=C(O)C(=O)C=CO1	14553.5	10207.4	7001.86	16503.7	18422.9	27745.4
POS_17143	[M]+	Malvidin 3-O-glucoside	0.375581	0.589392	0.221596	493.141	5.195	C12140	Phenylpropanoids and polyketides	Flavonoids	Flavonoid glycosides	[C23H25O12]+	PXUQTDZNOHRWLI-OXUVVOBNSA-O	COC1=CC(=CC(=C1O)OC)C2=[O+]C3=CC(=CC(=C3C=C2O[C@@H]4O[C@H](CO)[C@@H](O)[C@H](O)[C@H]4O)O)O	2036.17	37207.5	29537.4	42134.2	41275.3	33288.8
POS_4395	[M+H]+	Matrine	0.176568	0.985537	0.943467	249.194	6.433		Alkaloids and derivatives	Lupin alkaloids	Matrine alkaloids	C15H24N2O	ZSBXGIUJOOQZMP-JLNYLFASSA-N	O=C1CCC[C@@H]2[C@H]3CCCN4CCC[C@@H](CN12)[C@@H]34	60252.2	32720.4	44959.4	38613.4	49632.7	51710.2
POS_10140	[M+H]+	MEF-Glu	0.309177	0.720533	0.19243	371.166	3.673		Organic acids and derivatives	Carboxylic acids and derivatives	Amino acids, peptides, and analogues	C20H22N2O5	HLEKOHRJHVCEKY-UHFFFAOYSA-N	CC1=C(C)C(=CC=C1)NC2=C(C=CC=C2)C(=O)NC(CCC(O)=O)C(O)=O	18684.9	35966.5	22780.7	31446.1	43177.3	32841.6
POS_489	[M+H]+	Melamine	0.0724483	1.08012	0.872288	127.072	1.312	C08737	Organoheterocyclic compounds	Triazines	1,3,5-triazines	C3H6N6	JDSHMPZPIAZGSV-UHFFFAOYSA-N	NC1=NC(=NC(=N1)N)N	5690.58	2526.44	4826.65	1913.53	2933.94	7228.68
POS_6646	[M+Na]+	Meranzin hydrate	0.359501	0.536862	0.300435	301.103	4.278		Phenylpropanoids and polyketides	Coumarins and derivatives		C15H18O5	KGGUASRIGLRPAX-UHFFFAOYSA-N	COC1=C(CC(O)C(C)(C)O)C2=C(C=CC(=O)O2)C=C1	65176.1	9829.22	8084.96	37556.9	55314.4	61898.9
POS_1245	[M+H]+	Mesalamine	0.128743	0.846978	0.435795	154.049	1.996		Benzenoids	Benzene and substituted derivatives	Benzoic acids and derivatives	C7H7NO3	KBOPZPXVLCULAV-UHFFFAOYSA-N	NC1=CC=C(O)C(=C1)C(O)=O	11677.6	9910.74	6756.17	9543.26	10085.9	13836.3
POS_14263	[M+Na]+	Methyl (1S,4aS,6R,7S,7aS)-5,6-dihydroxy-7-(hydroxymethyl)-1-[(2S,3R,4S,5S,6R)-3,4,5-trihydroxy-6-(hydroxymethyl)oxan-2-yl]oxy-1,4a,5,6,7,7a-hexahydrocyclopenta[c]pyran-4-carboxylate	0.0934411	0.956366	0.869395	445.128	2.643		Lipids and lipid-like molecules	Prenol lipids	Terpene glycosides	C17H26O12	JDBBFQGXBSMMHP-PHINXLAUSA-N	COC(=O)C1=COC(OC2OC(CO)C(O)C(O)C2O)C3C(CO)C(O)C(O)C13	10189.7	21242.3	20791.1	15532	23677	15396.8
POS_23200	[M+Na]+	Methyl (4S,5Z,6S)-5-(2-acetyloxyethylidene)-4-[2-[2-(4-hydroxyphenyl)ethoxy]-2-oxoethyl]-6-[(2S,3R,4S,5S,6R)-3,4,5-trihydroxy-6-(hydroxymethyl)oxan-2-yl]oxy-4H-pyran-3-carboxylate	0.149335	0.765426	0.739359	605.176	4.321		Lipids and lipid-like molecules	Prenol lipids	Terpene glycosides	C27H34O14	DKRXODJAISNRGA-KIOYJQFDSA-N	COC(=O)C1=COC(OC2OC(CO)C(O)C(O)C2O)C(=CCOC(C)=O)C1CC(=O)OCCC3=CC=C(O)C=C3	29694.9	2782.62	1360.97	9318.05	19663.9	15226.8
POS_21242	[M+Na]+	Methyl (4S,5Z,6S)-5-(2-hydroxyethylidene)-4-[2-[2-(4-hydroxyphenyl)ethoxy]-2-oxoethyl]-6-[(2S,3R,4S,5S,6R)-3,4,5-trihydroxy-6-(hydroxymethyl)oxan-2-yl]oxy-4H-pyran-3-carboxylate	0.14514	0.511115	0.209151	563.174	3.942		Lipids and lipid-like molecules	Prenol lipids	Terpene glycosides	C25H32O13	AHTRGGWSBFOEEG-BXDNVMCDSA-N	COC(=O)C1=COC(OC2OC(CO)C(O)C(O)C2O)C(=CCO)C1CC(=O)OCCC3=CC=C(O)C=C3	521.589	3870.06	2976.17	2567.19	6725.12	5122.88
POS_2110	[M+H]+	Methyl 1-naphthoate	0.364029	0.853982	0.59887	187.075	6.118		Benzenoids	Naphthalenes	Naphthalenecarboxylic acids and derivatives	C12H10O2	HMRROBKAACRWBP-UHFFFAOYSA-N	COC(=O)C1=CC=CC2=CC=CC=C12	109282	60735.2	52239.4	62320.3	89786.9	108152
POS_20606	[M+H]+	Methyl 18-(hexadecanoyloxy)octadec-9-enoate	0.163201	0.785705	0.464977	551.495	13.69					C35H66O4	RIJDLOIIODLITF-KHPPLWFESA-N	O=C(OC)CCCCCCCC=CCCCCCCCCOC(=O)CCCCCCCCCCCCCCC	52826.8	32908.3	14553	46534.7	42722.6	38383.6
POS_11735	[M+Na]+	Methyl 2-(4,5-dihydroxy-6-methoxy-3,6-dimethyl-2-oxocyclohex-3-en-1-yl)oxy-4-hydroxy-3,6-dimethylbenzoate	0.148319	0.912041	0.668915	403.132	5.752		Benzenoids	Benzene and substituted derivatives	Benzoic acids and derivatives	C19H24O8	GJGRGJCMJUMZKN-UHFFFAOYSA-N	COC(=O)C1=C(OC2C(=O)C(=C(O)C(O)C2(C)OC)C)C(=C(O)C=C1C)C	40295.3	38840	21630.4	34289.4	44070	32124.2
POS_10787	[M+Na]+	Methyl 2-hydroxy-6-(4-hydroxy-2-methoxy-6-methoxycarbonylphenoxy)-4-methylbenzoate	0.279736	0.823541	0.551622	385.091	1.366		Benzenoids	Benzene and substituted derivatives	Diphenylethers	C18H18O8	KYDNOVLBVBYOSW-UHFFFAOYSA-N	COC(=O)C1=C(OC2=CC(=CC(=C2C(=O)OC)O)C)C(=CC(=C1)O)OC	44796.2	55271.4	65278.8	101112	46456.9	53206.5
POS_2450	[M+H]+	Methyl 2,4-dihydroxy-3,6-dimethylbenzoate	0.482337	0.726648	0.295323	197.08	5.105		Benzenoids	Benzene and substituted derivatives	Benzoic acids and derivatives	C10H12O4	UUQHKWMIDYRWHH-UHFFFAOYSA-N	COC(=O)C1=C(O)C(=C(O)C=C1C)C	34093	80306.8	72410.3	59645.1	94529.8	102910
POS_1899	[M+H]+	Methyl 4-hydroxycinnamate	0.0504678	1.14144	0.71419	179.068	1.789					C10H10O3	NITWSHWHQAQBAW-QPJJXVBHSA-N	COC(=O)/C=C/C1=CC=C(C=C1)O	31282.6	51153.1	15846.3	30350.9	25792.2	29960.7
POS_22943	[M+Na]+	Methyl 5,6-diacetoxy-10-hydroxy-2,4b,7,7,10a,12a-hexamethyl-12-methylene-1,4,8-trioxohexadecahydro-2H-naphtho[1,2-h]isochromene-2-carboxylate	0.0713152	2.63904	0.441131	599.245	11.719		Lipids and lipid-like molecules	Steroids and steroid derivatives	Oxosteroids	C30H40O11	FFXYBQSGDXRLHS-UHFFFAOYSA-N	COC(=O)C1(C)OC(=O)C2C3(C)C(OC(C)=O)C(OC(C)=O)C4C(C)(C)C(=O)CC(O)C4(C)C3CC(=C)C2(C)C1=O	2704.3	347.109	262.295	491.043	283.069	481.534
POS_7271	[M+H]+	Methyl E-2-methoxyimino-2-[(2-methylphenoxymethyl)phenyl]acetate	0.463013	11.6271	0.388988	314.138	8.463		Benzenoids	Phenol ethers		C18H19NO4	ZOTBXTZVPHCKPN-ZPHPHTNESA-N	CO\\N=C(/C(=O)OC)C1=C(COC2=C(C)C=CC=C2)C=CC=C1	87717	2642.15	618.163	3085.12	1296.31	3443.17
POS_3531	[M+H]+	Methyl jasmonate	0.353735	1.00566	0.982249	225.147	6.105		Lipids and lipid-like molecules	Fatty Acyls	Lineolic acids and derivatives	C13H20O3	GEWDNTWNSAZUDX-WQMVXFAESA-N	CCC=CCC1C(CCC1=O)CC(=O)OC	164541	309022	188427	223201	170242	264823
POS_2438	[M+H]+	Methyl L-tyrosinate	0.104472	0.627001	0.14468	196.097	2.682	C03404	Organic acids and derivatives	Carboxylic acids and derivatives	Amino acids, peptides, and analogues	C10H13NO3	MWZPENIJLUWBSY-VIFPVBQESA-N	COC(=O)C(N)CC1=CC=C(O)C=C1	912.035	2985.89	1758.67	3171.88	3138.28	2711.5
POS_6400	[M+H]+	Methyl linoleate	0.797699	0.815333	0.576723	295.262	11.937					C19H34O2	WTTJVINHCBCLGX-NQLNTKRDSA-N	CCCCC/C=C\\C/C=C\\CCCCCCCC(=O)OC	390277	239094	161916	180544	410914	379050
POS_26560	[M+H]+	Methyllycaconitine Perchlorate, Delphinium sp.	0.0983778	0.866402	0.52511	683.354	8.55		Lipids and lipid-like molecules	Prenol lipids	Diterpenoids	C37H50N2O10	XLTANAWLDBYGFU-UHFFFAOYSA-N	CCN1CC2(CCC(OC)C34C5CC6C(CC(O)(C5C6OC)C(O)(C(OC)C23)C14)OC)COC(=O)C7=CC=CC=C7N8C(=O)CC(C)C8=O	12309.2	8835.14	5908.53	9291.35	11857.3	10075.8
POS_5718	[M+H]+	Mianserin 2-Oxide	0.132133	1.13998	0.593283	281.159	4.31		Organoheterocyclic compounds	Benzazepines	Dibenzazepines	C18H20N2O	VVDXWJOYXVNLLQ-UHFFFAOYSA-N	C[N+]1([O-])CCN2C(C1)C3=C(CC4=C2C=CC=C4)C=CC=C3	30034.1	57648.2	45026.9	46577.5	29713.6	40122.9
POS_5150	[M+H]+	Michler's ketone	0.097748	0.714344	0.167142	269.165	8.36		Benzenoids	Benzene and substituted derivatives	Benzophenones	C17H20N2O	VVBLNCFGVYUYGU-UHFFFAOYSA-N	CN(C)C1=CC=C(C=C1)C(=O)C2=CC=C(C=C2)N(C)C	2043.48	3795.49	3343.65	4227.44	5180.75	3446.44
POS_5043	[M+H]+	Mirtazapine	0.5064	1.36514	0.315384	266.16	1.158	C07570	Organoheterocyclic compounds	Piperazinoazepines		C17H19N3	RONZAEMNMFQXRA-UHFFFAOYSA-N	CN1CCN2C(C1)C3=C(CC4=CC=CN=C24)C=CC=C3	137364	163564	181569	188049	87914.5	77477.2
POS_20475	[M+H-H2O]+	Monadoxanthin;(3R,3'R,6'R)-7,8-Didehydro-beta,epsilon-carotene-3,3'-diol	0.229808	2.10707	0.198252	549.404	12.08					C40H54O2	VAGYSFRRYPPSFX-SSVYFZBPNA-N	OC1C=C(C)C(C=CC(=CC=CC(=CC=CC=C(C=CC=C(C#CC2=C(C)CC(O)CC2(C)C)C)C)C)C)C(C)(C)C1	25002.1	18826.8	14460.7	4868.03	20855.8	1939.89
POS_3458	[M+H]+	Monoisobutylphthalic Acid	0.0926977	1.11569	0.608398	223.093	3.852		Benzenoids	Benzene and substituted derivatives	Phenylpropanes	C12H14O4	WXVFMRKUWGIPRB-UHFFFAOYSA-N	CC(C)CC1=CC=CC(=C1C(O)=O)C(O)=O	104229	103658	56315	81759.2	84569.4	70477.3
POS_15735	[M+Na]+	Monotropitoside	0.394927	3.27312	0.190814	469.132	4.058		Organic oxygen compounds	Organooxygen compounds	Carbohydrates and carbohydrate conjugates	C19H26O12	VHUNCYDAXJGCLO-AHMNSWSSSA-N	COC(=O)C1=C(O[C@@H]2O[C@H](CO[C@@H]3OC[C@@H](O)[C@H](O)[C@H]3O)[C@@H](O)[C@H](O)[C@H]2O)C=CC=C1	69553.6	79594.2	7744.58	9691.22	26583.4	11659
POS_12757	[M+H]+	Morusin	0.37092	0.745548	0.243935	421.159	7.977					C25H24O6	XFFOMNJIDRDDLQ-UHFFFAOYSA-N	CC(=CCC1=C(OC2=C(C1=O)C(=CC3=C2C=CC(O3)(C)C)O)C4=C(C=C(C=C4)O)O)C	107484	86294.4	45178.2	122371	101309	96831.8
POS_8379	[M+Na]+	Moupinamide	0.0166313	0.638163	0.34157	336.12	9.512	C02717	Benzenoids	Phenols	Methoxyphenols	C18H19NO4	NPNNKDMSXVRADT-WEVVVXLNSA-N	COC1=C(O)C=CC(=C1)\\C=C\\C(=O)NCCC2=CC=C(O)C=C2	47.9517	48.0904	144.506	90.5941	107.007	179.337
POS_7408	[M+Na]+	Mucorisocoumarin B	0.0696031	1.60054	0.203634	317.1	2.564		Phenylpropanoids and polyketides	Isocoumarins and derivatives		C15H18O6	CXVPYCSNJZJTRF-UHFFFAOYSA-N	COC1=CC(=C2C(=O)OC(=CC2=C1)CC(O)CC(C)O)O	2658.81	2466.34	1650.55	1708.74	2025.25	499.401
POS_13636	[M+H]+	Mundulone	0.160254	1.5918	0.0442248	435.181	2.889		Phenylpropanoids and polyketides	Isoflavonoids	Isoflavans	C26H26O6	KJTDZAHLWHEULN-UHFFFAOYSA-N	COC1=C(C=CC2=C1C=CC(C)(C)O2)C3=COC4=C(C=C5CC(O)C(C)(C)OC5=C4)C3=O	12378.3	16015.1	13069.6	11215.7	6471.82	8360.28
POS_16240	[M+H]+	Mundulone acetate	0.0678446	1.09287	0.804921	477.189	4.408		Phenylpropanoids and polyketides	Isoflavonoids	Isoflavans	C28H28O7	QUQMZWZRFQKNFP-UHFFFAOYSA-N	COC1=C(C=CC2=C1C=CC(C)(C)O2)C3=COC4=C(C=C5CC(OC(C)=O)C(C)(C)OC5=C4)C3=O	20919.7	12768.9	7321.38	15329.5	13408.5	8787.05
POS_6145	[M+H]+	Myclobutanil	0.068063	0.965569	0.861387	289.122	2.832		Phenylpropanoids and polyketides	Homoisoflavonoids	Homoisoflavones	C15H17ClN4	HZJKXKUJVSEEFU-UHFFFAOYSA-N	CCCCC(C[N]1C=NC=N1)(C#N)C2=CC=C(Cl)C=C2	7471.37	5344.53	4169.62	4891.88	6490.18	6209.15
POS_11432	[M+H]+	Myrislignan	0.279382	1.25223	0.344345	397.157	7.377					C21H26O6	ULZFTGWWPHYLGI-RBZFPXEDSA-N	C[C@@H]([C@@H](C1=CC(=C(C=C1)O)OC)O)OC2=C(C=C(C=C2OC)CC=C)OC	162801	127345	104988	104992	73817.9	136735
POS_2319	[M+H]+	Myristicin	0.161904	0.892809	0.748666	193.084	3.394	C10480	Organoheterocyclic compounds	Benzodioxoles		C11H12O3	BNWJOHGLIBDBOB-UHFFFAOYSA-N	COC1=C2OCOC2=CC(=C1)CC=C	49408.8	30285.1	15482.2	28485.4	45597.5	32520.1
POS_5736	[M+H]+	N-(2-(2,4,6-Trichlorophenoxy)ethyl)propan-1-amine	0.598007	3.90381	0.296849	282.019	8.866		Benzenoids	Phenol ethers		C11H14Cl3NO	CLFQSOIBYICELN-UHFFFAOYSA-N	CCCNCCOC1=C(Cl)C=C(Cl)C=C1Cl	53.9231	129773	244761	95502.9	392.057	59.698
POS_9419	[M+H]+	N-(2-Hydroxyethyl)icosanamide	0.750132	0.977288	0.81787	356.353	10.699		Organic nitrogen compounds	Organonitrogen compounds	Amines	C22H45NO2	AUJVQJHODMISJP-UHFFFAOYSA-N	CCCCCCCCCCCCCCCCCCCC(=O)NCCO	1.64281e+06	1.43819e+06	1.36704e+06	1.48936e+06	1.3365e+06	1.72555e+06
POS_1119	[M+H]+	N-(2,4-Dimethylphenyl)formamide	0.528611	1.20327	0.304959	150.091	4.958		Benzenoids	Benzene and substituted derivatives	Anilides	C9H11NO	JOFDPSBOUCXJCC-UHFFFAOYSA-N	CC1=CC(=C(NC=O)C=C1)C	401699	252017	288057	261455	261874	259352
POS_3114	[M+H]+	N-(9-Oxodecyl)acetamide	0.242587	1.15546	0.388483	214.182	6.585		Organic acids and derivatives	Carboxylic acids and derivatives	Carboxylic acid derivatives	C12H23NO2	JRJBWKJICGFLDP-UHFFFAOYSA-N	CC(O)=NCCCCCCCCC(C)=O	138698	115337	86653.1	94663.3	92329.8	107857
POS_10523	[M+Na]+	N-(Naphthalen-1-yl)-1-pentyl-1H-indole-3-carboxamide	0.08917	0.43957	0.0113738	379.175	4.415		Organoheterocyclic compounds	Indoles and derivatives	Indolecarboxylic acids and derivatives	C24H24N2O	GWCQNKRMTGVYIZ-UHFFFAOYSA-N	CCCCC[N]1C=C(C(=O)NC2=C3C=CC=CC3=CC=C2)C4=C1C=CC=C4	1127.94	793.563	654.753	2102.89	1552	2205.98
POS_9211	[M+H]+	N-[Propyl-[2-(2,4,6-trichlorophenoxy)ethyl]carbamoyl]formamide	3.08591	3.08668	0.39384	353.022	8.784		Benzenoids	Phenol ethers		C13H15Cl3N2O3	RHDVQZWCBQXOJW-UHFFFAOYSA-N	CCCN(CCOC1=C(Cl)C=C(Cl)C=C1Cl)C(=O)NC=O	4352.02	2.95952e+06	7.73684e+06	3.44113e+06	21003.2	4606.96
POS_619	[M+H]+	N-Acetylputrescine	0.270701	1.5261	0.708731	131.117	1.213	C02714	Organic acids and derivatives	Carboximidic acids and derivatives	Carboximidic acids	C6H14N2O	KLZGKIDSEJWEDW-UHFFFAOYSA-N	CC(=O)NCCCCN	61734.2	5498.9	2244.7	5620.74	19291.8	20613.7
POS_524	[M+H]+	N-Cyclohexylformamide	0.405387	1.20829	0.254237	128.106	4.833		Organic acids and derivatives	Carboxylic acids and derivatives	Carboxylic acid derivatives	C7H13NO	SWGXDLRCJNEEGZ-UHFFFAOYSA-N	OC=NC1CCCCC1	236588	157498	172542	152488	153491	162973
POS_170	[M+H]+	N-Methyl-L-alanine	0.352953	0.154692	0.15476	104.07	1.117	C02721	Organic acids and derivatives	Carboxylic acids and derivatives	Amino acids, peptides, and analogues	C4H9NO2	GDFAOVXKHJXLEI-VKHMYHEASA-N	CNC(C)C(O)=O	49.7857	5740.92	1773.65	976.161	24982	22941.1
POS_2577	[M+H]+	N-Methyldodecylamine	0.101504	0.992463	0.956548	200.236	8.771		Organic nitrogen compounds	Organonitrogen compounds	Amines	C13H29N	OMEMQVZNTDHENJ-UHFFFAOYSA-N	CCCCCCCCCCCCNC	58304.6	53321.3	45692.5	55264.4	41786.9	61461.7
POS_285	[M+H]+	N-Nitrosopiperidine	0.528189	2.24286	0.464155	115.085	1.402		Organoheterocyclic compounds	Piperidines	Nitrosopiperidines	C5H10N2O	UWSDONTXWQOZFN-UHFFFAOYSA-N	O=NN1CCCCC1	1009.35	107844	176130	123409	1933.33	1720.33
POS_151	[M+H]+	N-Nitrosopyrrolidine	0.179069	1.17583	0.712032	101.06	1.23	C19285	Organoheterocyclic compounds	Pyrrolidines		C4H8N2O	WNYADZVDBIBLJJ-UHFFFAOYSA-N	O=NN1CCCC1	20415.4	17526.8	24532.2	32837.5	11205.1	9089.43
POS_3118	[M+H]+	N,N-Dimethyldodecylamine	0.371271	3.3768	0.409031	214.252	8.842		Organic nitrogen compounds	Organonitrogen compounds	Amines	C14H31N	YWFWDNVOPHGWMX-UHFFFAOYSA-N	CCCCCCCCCCCCN(C)C	64003.1	5731.97	6228.95	7841.87	6736.52	7917.47
POS_3695	[M+H]+	N,N-Dimethyldodecylamine N-oxide	0.408687	1.08003	0.595276	230.248	8.727		Organic nitrogen compounds	Organonitrogen compounds	Aminoxides	C14H31NO	SYELZBGXAIXKHU-UHFFFAOYSA-N	CCCCCCCCCCCC[N+](C)(C)[O-]	1.06772e+06	851519	737806	825104	713616	921437
POS_4424	[M+H]+	N,O-Didesmethylvenlafaxine	0.0909096	1.07499	0.510393	250.175	7.196		Organic oxygen compounds	Organooxygen compounds	Alcohols and polyols	C15H23NO2	MMSWXJSQCAEDLK-UHFFFAOYSA-N	CNCC(C1=CC=C(O)C=C1)C2(O)CCCCC2	106500	82681.2	98687.1	95490.2	95177.4	77120.3
POS_6266	[M+H]+	N(4)-Acetylsulfadiazine	0.167872	0.756377	0.425991	293.078	7.945		Benzenoids	Benzene and substituted derivatives	Benzenesulfonamides	C12H12N4O3S	NJIZUWGMNCUKGU-UHFFFAOYSA-N	CC(=O)NC1=CC=C(C=C1)[S](=O)(=O)NC2=NC=CC=N2	23309.2	8739.41	12290.7	14556.2	25255.6	18808.8
POS_9220	[M+H]+	N(4)-Acetylsulfadimethoxine	0.12751	0.881857	0.672497	353.083	3.9		Benzenoids	Benzene and substituted derivatives	Benzenesulfonamides	C14H16N4O5S	DQWIIKBKAIPUPY-UHFFFAOYSA-N	COC1=CC(=NC(=N1)N[S](=O)(=O)C2=CC=C(NC(C)=O)C=C2)OC	12339.4	9034.13	6139.17	7057.07	10111.3	14030.3
POS_7602	[M+H]+	N(4)-Acetylsulfamethazine	0.109747	0.779176	0.614743	321.094	1.241		Benzenoids	Benzene and substituted derivatives	Benzenesulfonamides	C14H16N4O3S	LJKAKWDUZRJNPJ-UHFFFAOYSA-N	CC(O)=NC1=CC=C(C=C1)[S](=O)(=O)NC2=NC(=CC(=N2)C)C	384.23	7142.3	3941.26	4484.64	4574.13	5659.07
POS_29142	[M]+	Naadp	0.179478	1.4566	0.0443574	745.345	7.127		Nucleosides, nucleotides, and analogues	(5'->5')-dinucleotides		C21H28N6O18P3	QOTXBMGJKFVZRD-HISDBWNOSA-O	NC1=NC=NC2=C1N=C[N]2C3OC(CO[P](O)(=O)O[P](O)(=O)OCC4OC(C(O)C4O)[N+]5=CC=CC(=C5)C(O)=O)C(O)C3O[P](O)(O)=O	30482	38617.9	34591.1	21445	29515.3	20226.5
POS_8739	[M+H]+	Naltrexone	0.102025	0.670214	0.437131	342.173	1.281	C07253	Benzenoids	Benzene and substituted derivatives	Anilides	C20H23NO4	DQCKKXVULJGBQN-XFWGSAIBSA-N	OC1=CC=C2C[C@H]3N(CC[C@@]45[C@@H](OC1=C24)C(=O)CC[C@@]35O)CC6CC6	183.118	3781.67	3208.74	5132.87	2689.56	2880.9
POS_5464	[M+H]+	Nandrolone	0.556966	0.66143	0.32777	275.2	8.389	C07254	Lipids and lipid-like molecules	Steroids and steroid derivatives	Estrane steroids	C18H26O2	NPAGDVCDWIYMMC-IZPLOLCNSA-N	CC12CCC3C(CCC4=CC(=O)CCC34)C1CCC2O	13439.4	110820	65974.3	105999	100558	81053.2
POS_514	[M]+	Naphthalene	0.368903	0.8286	0.348372	128.06	7.94	C00829	Benzenoids	Naphthalenes		C10H8	UFWIBTONFRDIAS-UHFFFAOYSA-N	C1=CC2=CC=CC=C2C=C1	42777.2	74933.9	45601.1	63662	62529.2	70902.8
POS_23106	[M+Na]+	Naringin	0.115355	0.822972	0.405998	603.162	3.942					C27H32O14	DFPMSGMNTNDNHN-CSIAVLANSA-N	C[C@H]1[C@@H]([C@H]([C@H]([C@@H](O1)O[C@@H]2[C@H]([C@@H]([C@H](O[C@H]2OC3=CC(=C4C(=O)C[C@H](OC4=C3)C5=CC=C(C=C5)O)O)CO)O)O)O)O)O	9490.58	7066.98	6041.14	6855.96	11735	8868.92
POS_8856	[M+Na]+	Neobavaisoflavone	0.139285	4.1163	0.403386	345.112	3.848		Phenylpropanoids and polyketides	Isoflavonoids	Isoflav-2-enes	C20H18O4	OBGPEBYHGIUFBN-UHFFFAOYSA-N	CC(C)=CCC1=C(O)C=CC(=C1)C2=COC3=C(C=CC(=C3)O)C2=O	8568.79	668.077	609.491	231.423	1304.66	855.959
POS_2924	[M+H]+	Neocuproine	0.235125	1.43445	0.777823	209.102	1.593		Organoheterocyclic compounds	Phenanthrolines		C14H12N2	IYRGXJIJGHOCFS-UHFFFAOYSA-N	CC1=NC2=C(C=C1)C=CC3=C2N=C(C)C=C3	45299.6	1433.42	248.021	844.167	13609.3	18298.5
POS_11835	[M+Na]+	Neosolaniol	0.205378	0.63711	0.402695	405.141	3.01		Lipids and lipid-like molecules	Prenol lipids	Sesquiterpenoids	C19H26O8	TVZHDVCTOCZDNE-WVJYZQHISA-N	CC(=O)OC[C@]12C[C@H](O)C(=C[C@H]1O[C@@H]3[C@H](O)[C@@H](OC(C)=O)[C@@]2(C)[C@]34CO4)C	238.685	14668.6	10388.4	15935.4	7554.47	16213.9
POS_414	[M+H]+	Nicotinamide	0.822908	0.47829	0.135536	123.054	1.207	C00153	Organoheterocyclic compounds	Pyridines and derivatives	Pyridinecarboxylic acids and derivatives	C6H6N2O	DFPAKSUCGFBDDF-UHFFFAOYSA-N	OC(=N)C1=CC=CN=C1	398.792	126980	73877.3	167478	122168	131137
POS_5769	[M+H]+	Niflumic acid	0.0370466	1.25067	0.775711	283.077	2.546	C13698	Benzenoids	Benzene and substituted derivatives	Trifluoromethylbenzenes	C13H9F3N2O2	JZFPYUNJRRFVQU-UHFFFAOYSA-N	OC(=O)C1=CC=CN=C1NC2=CC(=CC=C2)C(F)(F)F	1386.54	131.054	314.067	328.719	501.099	634.725
POS_19335	[M+H]+	Nilotinib	0.202414	1.28207	0.610582	530.192	5.953		Benzenoids	Benzene and substituted derivatives	Anilides	C28H22F3N7O	HHZIURLSWUIHRB-UHFFFAOYSA-N	CC1=C[N](C=N1)C2=CC(=CC(=C2)C(F)(F)F)NC(=O)C3=CC(=C(C)C=C3)NC4=NC=CC(=N4)C5=CN=CC=C5	50183.4	19620.4	19405.3	23897.7	33237.6	12447
POS_23055	[M+H]+	Nocardamine	0.472069	0.734442	0.580073	601.37	9.868		Phenylpropanoids and polyketides	Macrolactams		C27H48N6O9	NHKCCADZVLTPPO-UHFFFAOYSA-N	ON1CCCCCN=C(O)CCC(=O)N(O)CCCCCN=C(O)CCC(=O)N(O)CCCCCN=C(O)CCC1=O	5554.55	132692	55795.2	83548.2	110900	69754.9
POS_13776	[M+Na]+	Nonaethylene glycol	0.248155	0.79425	0.442773	437.226	9.62		Organic oxygen compounds	Organooxygen compounds	Ethers	C18H38O10	YZUUTMGDONTGTN-UHFFFAOYSA-N	OCCOCCOCCOCCOCCOCCOCCOCCOCCO	26128.1	41717.5	56195.9	60971.1	33829.4	61373.8
POS_8322	[M+Na]+	Nor-Dentatin	0.28898	0.934121	0.705024	335.124	8.28		Phenylpropanoids and polyketides	Coumarins and derivatives	Pyranocoumarins	C19H20O4	WYMMNGQSPNWCIK-UHFFFAOYSA-N	CC1(C)OC2=C(C3=C(C=CC(=O)O3)C(=C2C=C1)O)C(C)(C)C=C	265510	229267	156031	256912	193868	245926
POS_6269	[M+H]+	Norcimifugin	0.148281	1.31833	0.372452	293.099	3.794					C15H16O6	FHCHSXPHLRBEBR-UHFFFAOYSA-N	CC(C)(C1CC2=C(O1)C=C3C(=C2O)C(=O)C=C(O3)CO)O	46075.3	49284.8	21430.8	23184.2	31776.9	33629.1
POS_23063	[M+H]+	Nostoxanthin	0.287727	0.687885	0.254837	601.42	11.05	C16284	Lipids and lipid-like molecules	Prenol lipids	Tetraterpenoids	C40H56O4	JVPASJUYZJKFHY-HWFHZMFDSA-N	CC(=C/C=C/C=C(C)/C=C/C=C(C)/C=C/C1=C(C)C[C@@H](O)[C@H](O)C1(C)C)\\C=C\\C=C(C)\\C=C\\C2=C(C)C[C@@H](O)[C@H](O)C2(C)C	7965.2	29045.3	33812.6	37013.4	32275.8	33668.5
POS_36602	[M+Na]+	O-6-deoxy-alpha-L-mannopyranosyl-(1->4)-O-beta-D-glucopyranosyl-(1->6)-1-O-[(2alpha,3beta,5xi,9xi,13xi,18xi,19xi)-2,3,23-trihydroxy-28-oxours-20-en-28-yl]-beta-D-glucopyranose	0.0536741	0.515034	0.22145	981.498	9.298		Lipids and lipid-like molecules	Prenol lipids	Terpene glycosides	C48H78O19	ATNAJMVRCNQHAG-AAXSTCLUSA-N	CC1OC(OC2C(O)C(O)C(OCC3OC(OC(=O)C45CCC6(C)C(CCC7C8(C)CC(O)C(O)C(C)(CO)C8CCC67C)C4C(C)C(=CC5)C)C(O)C(O)C3O)OC2CO)C(O)C(O)C1O	559.143	355.311	176.132	379.33	642.792	1095.38
POS_1117	[M+H]+	o-Acetotoluidide	0.498509	1.14351	0.437886	150.089	3.893		Benzenoids	Benzene and substituted derivatives	Anilides	C9H11NO	BPEXTIMJLDWDTL-UHFFFAOYSA-N	CC(=O)NC1=C(C)C=CC=C1	534603	349571	369672	393029	367941	335521
POS_2713	[M]+	O-Acetylcarnitine	0.75379	0.944618	0.955496	204.122	1.191		Lipids and lipid-like molecules	Fatty Acyls	Fatty acid esters	C9H18NO4+	RDHQFKQIGNGIED-MRVPVSSYSA-O	CC(=O)OC(CC(O)=O)C[N+](C)(C)C	464578	61507.8	15135.6	25083.8	158030	389838
POS_1413	[M+H]+	O-Acetylhomoserine	0.477906	0.410199	0.104961	162.074	1.087		Organic acids and derivatives	Carboxylic acids and derivatives	Amino acids, peptides, and analogues	C6H11NO4	FCXZBWSIAGGPCB-YFKPBYRVSA-N	CC(=O)OCC[C@H](N)C(O)=O	47.2404	31118.8	23150.4	31013.9	59435.6	41965.5
POS_7999	[M+Na]+	Ochromycinone	0.08742	0.708831	0.446863	329.085	1.266		Phenylpropanoids and polyketides	Angucyclines		C19H14O4	ZAWXOCUFQSQDJS-VIFPVBQESA-N	CC1CC(=O)C2=C3C(=O)C4=C(C(=CC=C4)O)C(=O)C3=CC=C2C1	136.132	3377.61	2573.26	2711.94	3200.39	2675.05
POS_4832	[M+H-H2O]+	Octadeca-2,4,9-trien-6-yne-1,18-diol	0.242403	1.37165	0.0450511	259.206	10.731					C18H28O2	YZQVZNIBOPZYDK-UTKXXTPHSA-N	OCC=CC=CC#CCC=CCCCCCCCCO	55107.5	57866	46716.8	35007.9	46251	35163.3
POS_5873	[M+H]+	Octadecanamide	6.88004	1.30729	0.338997	284.294	11.74	C13846	Organic acids and derivatives	Carboximidic acids and derivatives	Carboximidic acids	C18H37NO	LYRFLYHAGKPMFH-UHFFFAOYSA-N	CCCCCCCCCCCCCCCCCC(N)=O	6.00614e+07	6.25662e+07	2.9885e+07	4.50115e+07	3.80731e+07	3.35784e+07
POS_11222	[M+Na]+	Octaethylene glycol	0.17829	0.759421	0.647701	393.209	3.933		Organic oxygen compounds	Organooxygen compounds	Ethers	C16H34O9	GLZWNFNQMJAZGY-UHFFFAOYSA-N	OCCOCCOCCOCCOCCOCCOCCOCCO	634.193	14622.9	12807.5	20461.2	7402.4	9091.62
POS_11139	[M+H]+	Octyl-3,5-di-tert-butyl-4-hydroxy-hydrocinnamate	0.124863	1.17614	0.77938	391.323	12.238		Lipids and lipid-like molecules	Fatty Acyls	Fatty alcohol esters	C25H42O3	CFXCGWWYIDZIMU-UHFFFAOYSA-N	CCCCCCCCOC(=O)CCC1=CC(=C(O)C(=C1)C(C)(C)C)C(C)(C)C	8797.59	40948.8	12526.2	20909	18406.8	13630.7
POS_23105	[2M+Na]+	Officinalin isobutyrate	0.503258	0.48781	0.469429	603.144	3.618		Phenylpropanoids and polyketides	Coumarins and derivatives		C15H14O6	VUVWVGLISBHUCV-UHFFFAOYSA-N	COC(=O)C1=C(OC(=O)C(C)C)C=C2OC(=O)C=CC2=C1	110377	44749.6	17195.8	39922.1	258110	55225.5
POS_14073	[M+H]+	Oleanane-4H, + 2O	1.23025	3.10237	0.297528	441.372	10.021		Lipids and lipid-like molecules	Prenol lipids	Triterpenoids	C30H48O2	VNGUCOGHCJHFID-UHFFFAOYSA-N	CC1(C)CC2C3=CCC4C5(C)CCC(O)C(C)(CO)C5CCC4(C)C3(C)CCC2(C)C=C1	631679	175801	97362.5	22370.4	143569	125722
POS_13922	[M+H-H2O]+	Oleanolic acid	1.56374	0.613941	0.252265	439.354	10.581	C17148	Lipids and lipid-like molecules	Prenol lipids	Triterpenoids		MIJYXULNPSFWEK-GTOFXWBISA-N	CC1(C)CCC2(CCC3(C)C(=CCC4C5(C)CCC(O)C(C)(C)C5CCC34C)C2C1)C(O)=O	465324	448447	285644	292968	833836	826827
POS_3644	[M+H]+	Oxybenzone	0.323675	0.620466	0.446309	229.084	6.035	C14285	Benzenoids	Benzene and substituted derivatives	Benzophenones	C14H12O3	DXGLGDHPHMLXJC-UHFFFAOYSA-N	COC1=CC=C(C(=C1)O)C(=O)C2=CC=CC=C2	36608.9	23622.3	2874.55	16172.4	29637.9	55896.9
POS_15287	[M+H]+	Oxytetracycline	0.163055	0.737105	0.515014	461.16	3.045		Phenylpropanoids and polyketides	Tetracyclines		C22H24N2O9	FYDOORKXBWEKQM-GUQPPTOYSA-N	CN(C)C1C2C(O)C3C(=C(O)C4=C(C=CC=C4O)C3(C)O)C(=O)C2(O)C(=O)C(=C(N)O)C1=O	3850.32	14683.2	4644.96	7547.56	13307.2	10590.5
POS_5524	[M+H]+	p-Cumaroylagmatin	0.756626	0.576932	0.0542177	277.176	6.325		Phenylpropanoids and polyketides	Cinnamic acids and derivatives	Hydroxycinnamic acids and derivatives	C14H20N4O2	AKIHYQWCLCDMMI-UHFFFAOYSA-N	NC(=N)NCCCCNC(=O)C=CC1=CC=C(O)C=C1	85717.7	111336	93313.6	137158	217720	148417
POS_16552	[M+H]+	Paeonolide	0.15825	0.311968	0.272278	483.127	3.618					C20H28O12	IDZZECHGWAZTIB-SBJDUPFUSA-N	CC(=O)C1=C(C=C(C=C1)OC)O[C@H]2[C@H]([C@H]([C@@H]([C@@H](O2)CO[C@H]3[C@H]([C@H]([C@H](CO3)O)O)O)O)O)O	781.481	2453.7	874.176	1724	2452.55	8995.81
POS_9606	[M+NH4]+	Palatinose	2.32211	1.43879	0.618893	360.152	1.101		Organic oxygen compounds	Organooxygen compounds	Carbohydrates and carbohydrate conjugates	C12H22O11	PVXPPJIGRGXGCY-TZLCEDOOSA-N	OCC1OC(OCC2OC(O)(CO)C(O)C2O)C(O)C(O)C1O	5.20203e+06	1.41523e+06	802865	1.47798e+06	2.24959e+06	1.42963e+06
POS_4680	[M+H]+	Palmitic amide	8.34648	1.31924	0.332433	256.265	11.206					C16H33NO	HSEMFIZWXHQJAE-UHFFFAOYSA-N	O=C(N)CCCCCCCCCCCCCCC	9.49228e+07	1.04336e+08	4.81618e+07	6.92916e+07	6.58347e+07	5.24211e+07
POS_16295	[M+H]+	Panaxtriol	4.44629	0.661099	0.264266	477.391	11.713					C30H52O4	QFJUYMMIBFBOJY-AQIAMZLMSA-N	C[C@]1(CCCC(O1)(C)C)[C@H]2CC[C@@]3([C@@H]2[C@@H](C[C@H]4[C@]3(C[C@@H]([C@@H]5[C@@]4(CC[C@@H](C5(C)C)O)C)O)C)O)C	976929	6.41066e+06	5.96179e+06	7.15402e+06	6.72921e+06	6.30949e+06
POS_3341	[M+H]+	Pantothenic acid	0.438102	0.364124	0.127149	220.116	2.238	C00864	Organic acids and derivatives	Carboxylic acids and derivatives	Amino acids, peptides, and analogues	C9H17NO5	GHOKWGTUZJEAQD-ZETCQYMHSA-N	CC(C)(CO)C(O)C(O)=NCCC(O)=O	1040.87	23258	10601.9	15389	42618.6	37841
POS_7298	[M+Na]+	Pantoyl lactone glucoside	0.339671	0.797451	0.500093	315.106	2.386		Lipids and lipid-like molecules	Fatty Acyls	Fatty acyl glycosides	C12H20O8	BFCZPWYLRHFBNO-DTJAAUDXSA-N	CC1(C)COC(=O)C1OC2OC(CO)C(O)C(O)C2O	171362	78593.8	63512.8	128820	111185	153084
POS_2784	[M+H]+	Patchouli alcohol	0.360375	0.725746	0.279912	205.193	13.274		Organic oxygen compounds	Organooxygen compounds	Alcohols and polyols		GGHMUJBZYLPWFD-DUNKBJDJSA-N	C[C@H]1CCC2(O)C(C)(C)C3CC[C@@]2(C)C1C3	21605.5	51892.8	41488.8	67701.2	44547.5	46191.1
POS_15402	[M]+	Peonidin-3-glucoside	0.0710887	0.806437	0.748705	463.123	3.327	C12141	Phenylpropanoids and polyketides	Flavonoids	Flavonoid glycosides	C22H23O11	ZZWPMFROUHHAKY-OUUKCGNVSA-O	COC1=CC(=CC=C1O)C2=[O+]C3=CC(=CC(=C3C=C2OC4OC(CO)C(O)C(O)C4O)O)O	9203.82	6210.74	1730.06	4055.87	13786.2	3417.64
POS_24149	[M]+	Peonidin-3,5-O-di-beta-glucopyranoside	0.0462403	1.07829	0.883754	625.403	10.862	C16289	Phenylpropanoids and polyketides	Flavonoids	Flavonoid glycosides	C28H33O16	IPVSUYLZIAYTOK-DPOJTEBASA-O	COC1=CC(=CC=C1O)C2=[O+]C3=C(C=C2OC4OC(CO)C(O)C(O)C4O)C(=CC(=C3)O)OC5OC(CO)C(O)C(O)C5O	1816.54	11746.8	10141.4	5180	11370	5433.83
POS_30164	[2M+Na]+	Percorten	0.0576885	0.567941	0.503053	767.442	5.474		Lipids and lipid-like molecules	Steroids and steroid derivatives	Pregnane steroids	C23H32O4	VPGRYOFKCNULNK-UHFFFAOYSA-N	CC(=O)OCC(=O)C1CCC2C3CCC4=CC(=O)CCC4(C)C3CCC12C	160.025	937.013	583.698	2050.32	545.498	363.532
POS_10050	[M+H]+	Perindopril	0.205578	0.635291	0.108731	369.241	9.547	C07706	Organic acids and derivatives	Carboxylic acids and derivatives	Amino acids, peptides, and analogues	C19H32N2O5	IPVQLZZIHOAWMC-QXKUPLGCSA-N	CCCC(NC(C)C(=O)N1C2CCCCC2CC1C(O)=O)C(=O)OCC	7500.74	11814.2	6444.97	15640.3	10058.1	14849.8
POS_35552	[M+H]+	Petunidin-3-O-(6''-O-(4'''-O-E-coum)-alpha-rhamnopyranosyl-beta-glucopyranosyl)-5-O-beta-glucopyranoside	0.160297	0.91535	0.869575	933.56	12.583		Phenylpropanoids and polyketides	Flavonoids	Flavonoid glycosides	C43H49O23	BXEZTCOKOLHMKY-CHYZIXFFSA-O	COC1=CC(=CC(=C1O)O)C2=C(OC3OC(COC4OC(C)C(OC(=O)C=CC5=CC=C(O)C=C5)C(O)C4O)C(O)C(O)C3O)C=C6C(=CC(=CC6=[O+]2)O)OC7OC(CO)C(O)C(O)C7O	4412.08	27924.5	13367	8189.93	20822.4	20917.8
POS_13586	[M+NH4]+	Phenethyl 2-O-(beta-D-xylopyranosyl)-beta-D-glucopyranoside	0.443934	3.00124	0.346422	434.203	4.703		Organic oxygen compounds	Organooxygen compounds	Carbohydrates and carbohydrate conjugates	C19H28O10	CGZNTHDUAFIKOH-BMVMOQKNSA-N	OCC1OC(OCCC2=CC=CC=C2)C(OC3OCC(O)C(O)C3O)C(O)C1O	82923.4	13286.6	15248	11086	19829.6	6221.69
POS_1536	[M+H]+	Phenethyl acetate	0.718698	0.456656	0.0961038	165.09	13.045	C12303	Benzenoids	Benzene and substituted derivatives		C10H12O2	MDHYEMXUFSJLGV-UHFFFAOYSA-N	CC(=O)OCCC1=CC=CC=C1	18634.4	77006.6	39517.1	77512.4	84227.7	134234
POS_12206	[M+Na]+	Phenyl 6-O-[(2R,3R,4R)-3,4-dihydroxy-4-(hydroxymethyl)tetrahydro-2-furanyl]-beta-D-glucopyranoside	0.0282974	1.87095	0.442631	411.121	2.317		Organic oxygen compounds	Organooxygen compounds	Carbohydrates and carbohydrate conjugates	C17H24O10	YORZZUYHPOREJM-DCSNAHRYSA-N	OC[C@@]1(O)CO[C@@H](OC[C@H]2O[C@@H](OC3=CC=CC=C3)[C@H](O)[C@@H](O)[C@@H]2O)[C@@H]1O	550.94	212.37	54.3768	107.006	199.361	130.678
POS_737	[M+H-2H2O]+	Phenyl acetate	0.0413357	1.03537	0.904377	137.058	3.938					C8H8O2	IPBVNPXQWQGGJP-UHFFFAOYSA-N	CC(=O)OC1=CC=CC=C1	90346.1	91128.9	36054.5	81554.1	58939.1	69604.5
POS_370	[M+H]+	Phenylacetaldehyde	0.184006	1.04697	0.756681	121.064	7.406	C00601	Benzenoids	Benzene and substituted derivatives	Phenylacetaldehydes	C8H8O	DTUQWGWMVIHBKE-UHFFFAOYSA-N	O=CCC1=CC=CC=C1	71731.5	101889	80082.5	93853.8	78863.1	69604
POS_13584	[M+NH4]+	Phenylethyl primeveroside	0.245365	0.972002	0.918089	434.201	4.27		Organic oxygen compounds	Organooxygen compounds	Carbohydrates and carbohydrate conjugates	C19H28O10	ZRGXCWYRIBRSQA-UHFFFAOYSA-N	OC1COC(OCC2OC(OCCC3=CC=CC=C3)C(O)C(O)C2O)C(O)C1O	97347.1	63511.4	41720.9	55260.5	73466	79688.2
POS_22934	[M+H]+	Phloretin + C-Hex, C-Hex	0.156815	1.00772	0.966412	599.208	4.774		Phenylpropanoids and polyketides	Linear 1,3-diarylpropanoids	Chalcones and dihydrochalcones	C27H34O15	WAWHTTXPRUWFCZ-UHFFFAOYSA-N	OCC1OC(C(O)C(O)C1O)C2=C(O)C(=C(O)C(=C2O)C(=O)CCC3=CC=C(O)C=C3)C4OC(CO)C(O)C(O)C4O	187910	178964	104111	157061	161701	148614
POS_2062	[M+H]+	Phosphorylcholine	1.05083	34.1542	0.37527	184.071	1.259		Organic nitrogen compounds	Organonitrogen compounds	Quaternary ammonium salts	C5H14NO4P	YHHSONZFOIEMCP-UHFFFAOYSA-N	C[N+](C)(C)CCO[P](O)([O-])=O	426632	3944.18	3641.29	3294.3	3156.11	6263.02
POS_1061	[M+H]+	Phthalic anhydride	0.108593	1.28767	0.608544	149.023	4.109					C8H4O3	LGRFSURHDFAFJT-UHFFFAOYSA-N	C1=CC=C2C(=C1)C(=O)OC2=O	68012.7	237350	283904	68906.5	169694	219021
POS_7494	[M+H]+	Phytosphingosine	1.32082	0.531229	0.154369	318.299	10.256	C12144	Organic nitrogen compounds	Organonitrogen compounds	Amines	C18H39NO3	AERBNCYCJBRYDG-KSZLIROESA-N	CCCCCCCCCCCCCCC(O)C(O)C(N)CO	117194	314750	202224	302222	314411	577144
POS_582	[M+H]+	Pipecolic acid	0.0181389	1.3772	0.437425	130.086	2.07	C00408	Organic acids and derivatives	Carboxylic acids and derivatives	Amino acids, peptides, and analogues	C6H11NO2	HXEACLLIILLPRG-UHFFFAOYSA-N	OC(=O)C1CCCCN1	627.219	916.651	1637.64	874.913	468.963	966.254
POS_13744	[M+Na]+	Podofilox	0.00252215	1.13546	0.766216	437.127	1.645	C10874	Lignans, neolignans and related compounds	Lignan lactones	Podophyllotoxins	C22H22O8	YJGVMLPVUAXIQN-XVVDYKMHSA-N	COC1=C(OC)C(=CC(=C1)C2C3C(COC3=O)C(O)C4=CC5=C(OCO5)C=C24)OC	24.7887	53.8796	18.8912	28.947	38.2261	18.7478
POS_10465	[M]+	Polanrazine B	0.968335	0.951414	0.953943	377.318	11.986		Organic acids and derivatives	Carboxylic acids and derivatives	Amino acids, peptides, and analogues	C18H23N3O2S2	JXDWMFMAEDSXNI-QZTJIDSGSA-N	CS[C@@]1(CC2=C[NH]C3=C2C=CC=C3)NC(=O)[C@](NC1=O)(SC)C(C)C	764737	178884	33875.6	57105.5	389764	580545
POS_14765	[M+Na]+	Polygalatenoside A	0.154772	0.673614	0.774105	453.134	4.122		Organic oxygen compounds	Organooxygen compounds	Carbohydrates and carbohydrate conjugates	C19H26O11	RXRSNDCGNOOFLH-VZNNHAMSSA-N	OCC1OCC(OC2OC(COC(=O)C3=CC=CC=C3)C(O)C(O)C2O)C(O)C1O	33650.1	2667.26	1162.52	51796.1	2508.31	1335.51
POS_14140	[M+Na]+	Pomiferin	0.184941	0.88341	0.566246	443.15	3.155	C10519	Phenylpropanoids and polyketides	Isoflavonoids	Isoflavans	C25H24O6	GHCZYXUOYFOXIP-UHFFFAOYSA-N	CC(C)=CCC1=C(O)C2=C(OC=C(C2=O)C3=CC(=C(O)C=C3)O)C4=C1OC(C)(C)C=C4	27906.9	30210.1	18965.6	22625.7	36997.5	27632.7
POS_15186	[M+H]+	Prednisolone_Tebutate	0.276052	0.591623	0.216087	459.275	7.817		Lipids and lipid-like molecules	Steroids and steroid derivatives	Pregnane steroids	C27H38O6	HUMXXHTVHHLNRO-UHFFFAOYSA-N	CC(C)(C)CC(=O)OCC(=O)C1(O)CCC2C3CCC4=CC(=O)C=CC4(C)C3C(O)CC12C	9603.24	22704.6	17399.4	23266	41416.3	19336.1
POS_10624	[M+Na]+	Prednisone	1.07243	1.13718	0.434439	381.166	7.242		Lipids and lipid-like molecules	Steroids and steroid derivatives	Hydroxysteroids	C21H26O5	XOFYZVNMUHMLCC-ZPOLXVRWSA-N	C[C@]12CC(=O)[C@H]3[C@@H](CCC4=CC(=O)C=C[C@]34C)[C@@H]1CC[C@]2(O)C(=O)CO	2.3315e+06	2.46209e+06	1.76562e+06	2.27813e+06	1.95763e+06	1.53221e+06
POS_2794	[M+H]+	Prespatane	0.0457079	1.2179	0.644546	205.195	14.13		Lipids and lipid-like molecules	Prenol lipids	Sesquiterpenoids	C15H24	KZVOHANKAKKFOK-MTWVNVMRSA-N	C[C@H]1CC[C@@H]2[C@H]1[C@H]3[C@H](CC[C@@]23C)C(C)=C	20193.3	41903.2	39470.7	22945.3	47091.6	13358.6
POS_15744	[M+H]+	prim-O-b-D-Glucosylcimifugin	0.322976	0.972783	0.919514	469.179	6.781		Organoheterocyclic compounds	Benzopyrans	1-benzopyrans	C22H28O11	XIUVHOSBSDYXRG-UVTAEQIVSA-N	COC1=C2CC(OC2=CC3=C1C(=O)C=C(COC4OC(CO)C(O)C(O)C4O)O3)C(C)(C)O	79611.1	188978	154663	147108	113864	174122
POS_17170	[M]+	Primulin	0.234647	0.942562	0.889761	493.311	9.227		Phenylpropanoids and polyketides	Flavonoids	Flavonoid glycosides	C23H25O12	PXUQTDZNOHRWLI-XSEKTIEYSA-O	COC1=C(O)C(=CC(=C1)C2=[O+]C3=C(C=C2OC4OC(CO)C(O)C(O)C4O)C(=CC(=C3)O)O)OC	12316.8	77483.1	72011.7	44763.7	55486.3	71422
POS_10380	[M+H]+	Prochloraz	6.40604	5.22385	0.286925	376.039	8.938	C11182	Benzenoids	Phenol ethers		C15H16Cl3N3O2	TVLSRXXIMLFWEO-UHFFFAOYSA-N	CCCN(CCOC1=C(Cl)C=C(Cl)C=C1Cl)C(=O)[N]2C=CN=C2	30532.1	1.23638e+07	3.24006e+07	8.43285e+06	124941	17290.3
POS_22070	[M+H]+	Procyanidin B1	0.206665	0.66247	0.321539	579.149	3.145	C10221	Phenylpropanoids and polyketides	Flavonoids	Biflavonoids and polyflavonoids	C30H26O12	XFZJEEAOWLFHDH-UKWJTHFESA-N	O[C@H]1CC2=C(O[C@@H]1C3=CC(=C(O)C=C3)O)C(=C(O)C=C2O)[C@@H]4[C@@H](O)[C@H](OC5=CC(=CC(=C45)O)O)C6=CC(=C(O)C=C6)O	24275.2	16410.1	6871.15	18250.5	34051.1	19485
POS_5844	[M+H]+	Procymidone	0.0612806	4.51758	0.219622	284.023	7.987		Organoheterocyclic compounds	Piperidines	Phenylpiperidines	C13H11Cl2NO2	QXJKBPAVAHBARF-UHFFFAOYSA-N	CC12CC1(C)C(=O)N(C2=O)C3=CC(=CC(=C3)Cl)Cl	124.713	1541.13	2899.24	628.299	251.571	130.646
POS_10440	[M+Na]+	Propyl 2-O-beta-D-xylopyranosyl-beta-D-glucopyranoside	0.402876	0.828876	0.750626	377.141	2.372		Organic oxygen compounds	Organooxygen compounds	Carbohydrates and carbohydrate conjugates	C14H26O10	YBKPQAJLYSMOBM-HCDYWNEASA-N	CCCO[C@@H]1O[C@H](CO)[C@@H](O)[C@H](O)[C@H]1O[C@@H]2OC[C@@H](O)[C@H](O)[C@H]2O	254.298	148939	83687.3	87418.2	129378	64162.5
POS_12615	[M+H]+	Protostemonine	0.706501	0.769222	0.839956	418.229	2.846					C23H31NO6	JDGNFRYDHRYXNL-BBDFNLGKSA-N	C[C@H]1C[C@H](OC1=O)[C@@H]2CC[C@@H]3N2CCC[C@@H]4[C@@H]3[C@@H](/C(=C\\5/C(=C(C(=O)O5)C)OC)/O4)C	21.7473	102681	177408	360221	1960.47	1967.25
POS_13623	[M+H]+	Prunin	0.0875228	0.772979	0.426119	435.129	4.886		Phenylpropanoids and polyketides	Flavonoids	Flavonoid glycosides	C21H22O10	DLIKSSGEMUFQOK-SFTVRKLSSA-N	OCC1OC(OC2=CC3=C(C(=O)CC(O3)C4=CC=C(O)C=C4)C(=C2)O)C(O)C(O)C1O	18261.7	9980.16	6720.61	18531	12629.8	14070
POS_7732	[M+H]+	PRZ_M323b	0.294463	7.90647	0.198049	323.993	7.984		Benzenoids	Phenol ethers		C12H12Cl3NO3	KOOVZZFZNASYFB-UHFFFAOYSA-N	CC(=O)CN(CCOC1=C(Cl)C=C(Cl)C=C1Cl)C=O	0	31505.1	55044.6	10863.1	55.9879	27.5882
POS_8566	[M+H]+	Pseudocopsinine	0.228225	0.911861	0.820883	339.214	8.147					C21H26N2O2	CZLWGXKWXLVFJU-UHFFFAOYNA-N	O=C(OC)C1CC23CCCN4CCC5(C=6C=CC=CC6NC15C2C)C43	14476.2	45492.7	44734.9	55770.3	23067.2	35986.9
POS_4374	[M+H]+	Pterosin A	0.115812	1.43847	0.340416	249.144	4.35		Benzenoids	Indanes	Indanones	C15H20O3	BDZJLPDYMKPKGC-HNNXBMFYSA-N	CC1=CC2=C(C(=C1CCO)C)C(=O)[C@](C)(CO)C2	28637.7	75797	44138.5	31536.1	35018.8	36730.7
POS_3284	[M+H]+	Pterosin B	0.426482	0.741815	0.523558	219.136	5.578		Benzenoids	Indanes	Indanones	C14H18O2	SJNCSXMTBXDZQA-SECBINFHSA-N	C[C@@H]1CC2=C(C(=C(CCO)C(=C2)C)C)C1=O	5798.86	89779.7	52135.7	71214.2	59407.6	68503.5
POS_20119	[M+H]+	Puberanidine	0.0572555	0.534377	0.34826	543.308	6.32		Lipids and lipid-like molecules	Prenol lipids	Diterpenoids	C30H42N2O7	VSUODASNSRJNCP-WGVBKJPXSA-N	CCN1C[C@@]2(CC[C@H](OC)C34[C@@H]2CC(C13)[C@@]5(O)C[C@H](OC)[C@H]6C[C@@H]4[C@]5(O)[C@H]6OC)OC(=O)C7=CC=CC=C7N	1350.07	1429.51	750.98	2175.57	3846.88	584.413
POS_11702	[M+H]+	Puerins I-IV	0.119648	1.00686	0.991038	402.156	3.994					C21H23NO7		O=C1N(CC)C(c2c(O)cc(O)c3c2OC(c4ccc(O)c(O)c4)C(O)C3)CC1	100760	34048	14869.7	72582.3	37137.8	38937.3
POS_7299	[M+H]+	Pyraclonil	0.0725516	1.27058	0.39716	315.106	2.028		Organic nitrogen compounds	Organonitrogen compounds	Amines	C15H15ClN6	IHHMUBRVTJMLQO-UHFFFAOYSA-N	CN(CC#C)C1=C(C=N[N]1C2=N[N]3CCCCC3=C2Cl)C#N	14346.3	18021.2	10884.3	6955.06	15619.8	11466.3
POS_10955	[M+H]+	Pyraclostrobin	0.366986	2.82061	0.29475	388.107	8.813		Organoheterocyclic compounds	Azoles	Pyrazoles	C19H18ClN3O4	HZRSNVGNWUDEFX-UHFFFAOYSA-N	CON(C(=O)OC)C1=CC=CC=C1COC2=N[N](C=C2)C3=CC=C(Cl)C=C3	5655.71	58664.5	78209.7	43546.4	3200.27	3784.98
POS_1648	[M+H]+	Pyridoxine	0.0459523	1.13571	0.727692	170.079	1.3	C00314	Organoheterocyclic compounds	Pyridines and derivatives	Pyridoxines	C8H11NO3	LXNHXLLTXMVWPM-UHFFFAOYSA-N	CC1=NC=C(CO)C(=C1O)CO	30734.1	39746	83904.6	47156	43574.3	45206.7
POS_8179	[M+H]+	Pyridoxine + O-Hex	0.291083	1.4092	0.60505	332.131	1.549		Organoheterocyclic compounds	Pyridines and derivatives	Pyridoxines	C14H21NO8	MDLTWTOQCHCLSZ-UHFFFAOYSA-N	CC1=NC=C(COC2OC(CO)C(O)C(O)C2O)C(=C1O)CO	151895	69693.8	37682.2	79239.9	4388.04	100356
POS_239	[M+H]+	Pyrrole-2-carboxylic acid	0.148568	1.30911	0.335946	112.049	1.204	C05942	Organoheterocyclic compounds	Pyrroles	Pyrrole carboxylic acids and derivatives	C5H5NO2	WRHZVMBBRYBTKZ-UHFFFAOYSA-N	OC(=O)C1=CC=C[NH]1	20582.3	30828.1	37730.6	30645.3	17354.3	20092.9
POS_291	[M+H]+	Pyrrolidin-1-ium-2-carboxylate	0.461062	0.766285	0.751524	116.072	1.121		Organic acids and derivatives	Carboxylic acids and derivatives	Amino acids, peptides, and analogues	C5H9NO2	ONIBWKKTOPOVIA-UHFFFAOYSA-N	OC(=O)C1CCCN1	168593	14926.9	30147.2	22813.6	166045	89977.3
POS_29669	[M+H]+	Quercetin-3-neohesperidoside-7-rhamnoside	0.079862	0.756393	0.555582	757.36	7.105		Phenylpropanoids and polyketides	Flavonoids	Flavonoid glycosides	C33H40O20	WLPJMCCYDZFCBL-HTMUFORZSA-N	CC1OC(OC2C(O)C(O)C(CO)OC2OC3=C(OC4=CC(=CC(=C4C3=O)O)OC5OC(C)C(O)C(O)C5O)C6=CC(=C(O)C=C6)O)C(O)C(O)C1O	2865.34	4626.33	1214.37	5971.83	2628.77	2909.35
POS_6281	[M+Na]+	Quinolactacin A	0.11546	1.21961	0.270369	293.134	4.588		Organoheterocyclic compounds	Quinolines and derivatives	Pyrroloquinolines	C16H18N2O2	FLHQAMWKNPOTDV-UHFFFAOYSA-N	CCC(C)C1NC(=O)C2=C1N(C)C3=C(C=CC=C3)C2=O	36320.3	56637.8	41789.6	40269.9	34250.5	35963.5
POS_11663	[M+H]+	Reserpic acid	0.284182	0.873004	0.567197	401.218	4.081		Alkaloids and derivatives	Corynanthean-type alkaloids		C22H28N2O5	JVHNBFFHWQQPLL-WOXROFTLSA-N	CO[C@H]1[C@H](O)C[C@@H]2CN3CCC4=C([NH]C5=C4C=CC(=C5)OC)[C@H]3C[C@@H]2[C@@H]1C(O)=O	33828	69108	57932.2	60916.4	49617.9	73735.4
POS_23387	[M+H]+	Reserpine	0.146713	0.744572	0.677557	609.271	11.264	C06539	Alkaloids and derivatives	Yohimbine alkaloids		C33H40N2O9	QEVHRUUCFGRFIF-MDEJGZGSSA-N	COC1C(CC2CN3CCC4=C([NH]C5=C4C=CC(=C5)OC)C3CC2C1C(=O)OC)OC(=O)C6=CC(=C(OC)C(=C6)OC)OC	881.842	12328	3235.38	2927.48	8296.68	10862.6
POS_29054	[M+Na]+	Ritonavir	0.164383	1.02258	0.948617	743.289	4.965	C07240	Organic acids and derivatives	Carboxylic acids and derivatives	Amino acids, peptides, and analogues	C37H48N6O5S2	NCDNCNXCDXHOMX-XGKFQTDJSA-N	CC(C)C(N=C(O)N(C)CC1=CSC(=N1)C(C)C)C(O)=NC(CC(O)C(CC2=CC=CC=C2)N=C(O)OCC3=CN=CS3)CC4=CC=CC=C4	23359.5	64052.3	37960.4	33678.7	35556	53369.5
POS_9104	[M+NH4]+	Rosiridin	0.12705	1.20402	0.791233	350.213	5.101		Lipids and lipid-like molecules	Prenol lipids	Terpene glycosides	C16H28O7	PBPYEEMQIFDGSQ-MIYBPCGNSA-N	CC(C)=CCC(O)C(C)=CCOC1OC(CO)C(O)C(O)C1O	2323.64	34885.8	11998.1	16576.6	10345.3	13947.5
POS_16523	[M+NH4]+	Rosiridoside B	0.496187	0.924339	0.828012	482.255	5.02					C21H36O11	YURWKCHIKAZLIL-BPRLZUSCNA-N	OCC1OC(OCC2OC(OCC=C(C)C(O)CC=C(C)C)C(O)C(O)C2O)C(O)C1O	66683.1	268911	163818	192972	171173	176145
POS_6095	[M+H]+	Rutaecarpine	0.0277389	1.81259	0.115871	288.104	1.468	C09238	Organoheterocyclic compounds	Indoles and derivatives	Pyridoindoles	C18H13N3O	ACVGWSKVRYFWRP-UHFFFAOYSA-N	O=C1N2CCC3=C([NH]C4=C3C=CC=C4)C2=NC5=C1C=CC=C5	370.797	275.625	176.065	105.081	159.243	189.44
POS_28730	[2M+Na]+	Rutamarin	0.8924	1.45054	0.722069	735.313	7.327	C09308	Phenylpropanoids and polyketides	Coumarins and derivatives	Furanocoumarins	C21H24O5	AWMHMGFGCLBSAY-UHFFFAOYSA-N	CC(=O)OC(C)(C)C1CC2=CC3=C(OC(=O)C(=C3)C(C)(C)C=C)C=C2O1	758431	111299	24507.4	94454.7	181060	340971
POS_741	[M+H]+	Sabinene	0.321684	0.947391	0.828805	137.059	4.698		Lipids and lipid-like molecules	Prenol lipids	Monoterpenoids	C10H16	NDVASEGYNIMXJL-UHFFFAOYSA-N	CC(C)[C@]12CCC(=C)[C@H]1C2	595372	462268	252383	460841	517691	404238
POS_7007	[M+H]+	Salicin	0.0612719	0.901846	0.851351	309.092	2.59	C01451	Organic oxygen compounds	Organooxygen compounds	Carbohydrates and carbohydrate conjugates	C13H18O7	NGFMICBWJRZIBI-UJPOAAIJSA-N	OCC1OC(OC2=C(CO)C=CC=C2)C(O)C(O)C1O	2867.68	3243.44	311.783	979.01	2798.62	3344.32
POS_7482	[M+NH4]+	Salidroside	0.129663	0.489041	0.117498	318.152	3.02		Organic oxygen compounds	Organooxygen compounds	Carbohydrates and carbohydrate conjugates	C14H20O7	ILRCGYURZSFMEG-RKQHYHRCSA-N	OCC1OC(OCCC2=CC=C(O)C=C2)C(O)C(O)C1O	364.399	2760.98	1894.15	2381.9	4123.05	3759.06
POS_5078	[M+H]+	Sambucinol	0.162467	0.90259	0.760295	267.158	7.033		Organoheterocyclic compounds	Oxepanes		C15H22O4	GFLMBFRNOPTZDK-CMBQYIQPSA-N	CC1=C[C@]23O[C@@H]4[C@@H](O)C[C@](C)([C@@]2(C)CC1)[C@]4(CO)O3	10095.7	26211.8	29756.1	32402.5	19433.5	21357.4
POS_4334	[M+H]+	Santonin	1.21707	12.331	0.392468	247.134	4.86	C02206	Lipids and lipid-like molecules	Prenol lipids	Terpene lactones	C15H18O3	XJHDMGJURBVLLE-BOCCBSBMSA-N	CC1C2CCC3(C)C=CC(=O)C(=C3C2OC1=O)C	604308	11203.1	5650.33	22916.6	9030.58	18426.8
POS_20088	[M+H]+	Satratoxin F	0.419039	0.549726	0.411824	543.216	6.433		Lipids and lipid-like molecules	Prenol lipids	Sesquiterpenoids	C29H34O10	SJCPVUVBUQDGKN-VXWIUBPCSA-N	CC1=CC2OC3CC4OC(=O)/C=C\\C=C/C5(OCCC6(OC6C(=O)OCC2(CC1)C4(C)C37CO7)C5O)C(C)=O	8779.07	31931	23353.9	3152.4	58443	54942.6
POS_20549	[M+Na]+	Satratoxin H	0.150964	0.885795	0.45883	551.227	4.943		Lipids and lipid-like molecules	Prenol lipids	Sesquiterpenoids	C29H36O9	MUACSCLQRGEGOE-MOCAONITSA-N	C[C@H](O)[C@@]\\12OCC\\C(=C/C(=O)OC[C@]34CCC(=C[C@H]3O[C@@H]5CC(OC(=O)/C=C/C=C1)[C@@]4(C)[C@]56CO6)C)[C@H]2O	10903.1	17271.5	11285.1	15230.8	14668.6	14647.7
POS_13873	[M+Na]+	Sayaendoside	0.180014	0.750253	0.371925	439.155	2.884		Organic oxygen compounds	Organooxygen compounds	Carbohydrates and carbohydrate conjugates	C19H28O10	UWKRNCNWJVCHGZ-DERWZFJFSA-N	OCC1OC(OCCC2=CC=CC=C2)C(OC3OCC(O)(CO)C3O)C(O)C1O	7338.44	15009.7	13214.8	22141.9	12791.7	12467.7
POS_14908	[M+Na]+	Schizandrin	0.596547	1.53233	0.220854	455.201	6.041		Phenylpropanoids and polyketides	Tannins	Hydrolyzable tannins	C24H32O7	YEFOAORQXAOVJQ-RZFZLAGVSA-N	COC1=CC2=C(C(=C1OC)OC)C3=C(OC)C(=C(OC)C=C3CC(C)(O)C(C)C2)OC	250365	295680	135118	168175	179819	96534.2
POS_2675	[M+H-H2O]+	Selina-4(14),7(11)-diene-9-ol;[1S-(1alpha,4abeta,8aalpha)]-Decahydro-8a-methyl-5-methylene-3-(1-methylethylidene)-1-naphthalenol	2.25624	2.38026	0.155929	203.176	12.005					C15H24O	KIWHFBIBAJSYHN-JCUKGLBFNA-N	OC1CC(=C(C)C)CC2C(=C)CCCC12C	1.23626e+06	2.34207e+06	4.00155e+06	1.54157e+06	752038	890872
POS_1849	[M+H]+	Serotonin	0.199221	1.04499	0.89058	177.102	2.059	C00780	Organoheterocyclic compounds	Indoles and derivatives	Tryptamines and derivatives	C10H12N2O	QZAYGJVTTNCVMB-UHFFFAOYSA-N	NCCC1=C[NH]C2=C1C=C(O)C=C2	1.01566e+06	1.12582e+06	695427	765934	1.38313e+06	565720
POS_13243	[M+H]+	Shanzhiside methyl ester	0.0568597	0.911984	0.730967	429.136	2.974		Lipids and lipid-like molecules	Prenol lipids	Terpene glycosides	C17H26O11	KKSYAZCUYVRKML-IRDZEPHTSA-N	COC(=O)C1=COC(OC2OC(CO)C(O)C(O)C2O)C3C1C(O)CC3(C)O	9122.31	7858.34	5076.09	7081.13	11021.8	6082.58
POS_5532	[M+H]+	Shogaol	0.960979	0.74712	0.388774	277.179	7.323	C10494	Benzenoids	Phenols	Methoxyphenols	C17H24O3	OQWKEEOHDMUXEO-BQYQJAHWSA-N	CCCCCC=CC(=O)CCC1=CC=C(O)C(=C1)OC	259490	500293	669990	828423	660525	424763
POS_14038	[M+Na]+	Simvastatin	0.291874	0.814374	0.762041	441.268	5.598		Organoheterocyclic compounds	Lactones	Delta valerolactones	C25H38O5	RYMZZMVNJRMUDD-HGQWONQESA-N	CCC(C)(C)C(=O)O[C@H]1C[C@@H](C)C=C2C=C[C@H](C)[C@H](CC[C@@H]3C[C@@H](O)CC(=O)O3)[C@@H]12	6455.09	53754.4	110860	108035	82722.8	19304.4
POS_2832	[M+H]+	Sinapoyl malate	0.195814	1.18504	0.447211	207.063	4.158		Phenylpropanoids and polyketides	Cinnamic acids and derivatives	Hydroxycinnamic acids and derivatives	C15H16O9	DUDGAPSRYCQPBG-UFFNRZRYSA-N	COC1=C(O)C(=CC(=C1)C=CC(=O)OC(CC(O)=O)C(O)=O)OC	63316	47923.3	33366	36287.6	43866.8	41871.1
POS_2320	[M+H-H2O]+	Sinapyl alcohol	0.372898	0.645638	0.390342	193.085	4.186	C02325	Benzenoids	Phenols	Methoxyphenols		LZFOPEXOUVTGJS-ONEGZZNKSA-N	COC1=CC(=CC(=C1O)OC)C=CCO	3023.95	51822.7	22443.5	33384.5	46648.6	39678.2
POS_7766	[M+H]+	Skimmin	0.146033	3.98835	0.448839	325.086	2.943		Phenylpropanoids and polyketides	Coumarins and derivatives	Coumarin glycosides	C15H16O8	VPAOSFFTKWUGAD-TVKJYDDYSA-N	OCC1OC(OC2=CC3=C(C=CC(=O)O3)C=C2)C(O)C(O)C1O	10449.4	586.63	241.386	1502.4	632.585	692.618
POS_27538	[M+H]+	Solanidine base + O-Hex-dHex	0.510761	1.05506	0.863773	706.457	11.219		Lipids and lipid-like molecules	Steroids and steroid derivatives	Steroidal glycosides	C39H63NO10	ZLSYCIYRYZUJCZ-UHFFFAOYSA-N	CC1CCC2C(C)C3C(CC4C5CC=C6CC(CCC6(C)C5CCC34C)OC7OC(CO)C(O)C(O)C7OC8OC(C)C(O)C(O)C8O)N2C1	593100	646334	249918	337096	513942	560592
POS_12647	[M+H]+	Solvent green 3	0.30539	0.712057	0.267185	419.169	4.866		Benzenoids	Anthracenes	Anthraquinones	C28H22N2O2	TVRGPOFMYCMNRB-UHFFFAOYSA-N	CC1=CC=C(NC2=CC=C(NC3=CC=C(C)C=C3)C4=C2C(=O)C5=CC=CC=C5C4=O)C=C1	32060.8	37107.3	15856.6	30089.1	51252.5	38065.5
POS_29313	[M+H]+	Spinetoram	2.23163	1.62883	0.652574	748.496	9.713		Organic oxygen compounds	Organooxygen compounds	Carbohydrates and carbohydrate conjugates	C42H69NO10	GOENIMGKWNZVDA-OAMCMWGQSA-N	CCOC1C(OC)C(C)OC(OC2CC3CCC4C5CC(=O)OC(CC)CCCC(OC6CCC(C(C)O6)N(C)C)C(C)C(=O)C5=CC4C3C2)C1OC	956.461	2.27564e+06	1.65587e+06	2.38535e+06	19977	8961.73
POS_35254	[M+Na]+	Stachybocin C	0.18103	2.31893	0.257376	921.478	10.274		Organoheterocyclic compounds	Isoindoles and derivatives	Isoindolines	C52H70N2O11	GBUQOBUNFQDAQG-CRDDFVEESA-N	C[C@@H]1CCC2C(C)(C)[C@H](O)CC[C@]2(C)[C@@]13CC4=C(O)C=C5C(=O)N(CC5=C4O3)[C@@H](CCCCN6CC7=C8O[C@]9(CC8=C(O)C=C7C6=O)[C@H](C)CCC%10C(C)(C)[C@H](O)[C@H](O)C[C@]9%10C)C(O)=O	15277.5	7912.63	2601.71	4038.46	4303.62	2780.18
POS_907	[M+H]+	Stachydrine	0.883542	0.539866	0.433214	144.101	1.122					C7H13NO2	CMUNUTVVOOHQPW-LURJTMIESA-O	C[N+]1(CCC[C@H]1C(=O)O)C	253591	40878.9	42764.5	66322	199792	358548
POS_12265	[M+H]+	STIGMASTA-4,22-DIEN-3-ONE	0.315512	1.21621	0.25067	411.361	12.504					C29H46O	MKGZDUKUQPPHFM-LPJPOILFSA-N	O=C1C=C2CCC3C(CCC4(C)C(CCC34)C(C=CC(CC)C(C)C)C)C2(C)CC1	329791	347605	410518	346828	215983	331698
POS_12378	[M+H]+	Stigmasterol	1.65505	0.744818	0.204909	413.375	13.092		Lipids and lipid-like molecules	Steroids and steroid derivatives	Stigmastanes and derivatives	C29H48O	HCXVJBMSMIARIN-PHZDYDNGSA-N	CC[C@H](/C=C/[C@@H](C)[C@H]1CC[C@H]2[C@@H]3CC=C4C[C@@H](O)CC[C@]4(C)[C@H]3CC[C@]12C)C(C)C	812954	1.32323e+06	1.40777e+06	1.82448e+06	1.7287e+06	1.20497e+06
POS_20624	[M+H]+	Styraxlignolide F	0.279809	0.518126	0.0235166	552.238	5.305					C27H34O11	AEMJDNJKSCBKRL-ZYKRCLGOSA-N	COC1=C(C=C(C=C1)C[C@H]2[C@@H](COC2=O)CC3=CC(=C(C=C3)O[C@H]4[C@@H]([C@H]([C@@H]([C@H](O4)CO)O)O)O)OC)OC	5744.19	11154	11304	15298.9	20965.3	18166.9
POS_9812	[M+Na]+	Sucrose	1.25995	1.11916	0.848791	365.104	1.096	C00089	Organic oxygen compounds	Organooxygen compounds	Carbohydrates and carbohydrate conjugates	C12H22O11	CZMRCDWAGMRECN-UGDNZRGBSA-N	OCC1OC(OC2(CO)OC(CO)C(O)C2O)C(O)C(O)C1O	2.56998e+06	699385	603091	945961	1.58662e+06	927570
POS_7990	[M+H]+	Sulcotrione	0.190584	0.915884	0.725689	329.022	1.046		Organic oxygen compounds	Organooxygen compounds	Carbonyl compounds	C14H13ClO5S	PQTBTIFWAXVEPB-UHFFFAOYSA-N	C[S](=O)(=O)C1=CC(=C(C=C1)C(=O)C2C(=O)CCCC2=O)Cl	61505.6	38574.9	28873.3	40006.8	54017.8	46772.6
POS_5569	[M+H]+	Sulfamethazine	0.512349	0.459934	0.258514	279.095	6.226	C19530	Benzenoids	Benzene and substituted derivatives	Benzenesulfonamides	C12H14N4O2S	ASWVTGNCAZCNNR-UHFFFAOYSA-N	CC1=NC(=NC(=C1)C)N[S](=O)(=O)C2=CC=C(N)C=C2	51114.2	15909.5	21035.9	19410	100751	71300.1
POS_9546	[M+H]+	Sweroside	0.252116	0.887174	0.608057	359.137	3.879		Organic oxygen compounds	Organooxygen compounds	Carbohydrates and carbohydrate conjugates	C16H22O9	VSJGJMKGNMDJCI-ZASXJUAOSA-N	OCC1OC(OC2OC=C3C(CCOC3=O)C2C=C)C(O)C(O)C1O	46776.9	61486.7	51532.6	82071.4	43977.7	54069.3
POS_18134	[M+H]+	Syringetin-3-o-glucoside	0.239747	0.961195	0.942772	509.128	5.287		Phenylpropanoids and polyketides	Flavonoids	Flavonoid glycosides	C23H24O13	JMFWYRWPJVEZPV-AVGVHVDKSA-N	COC1=CC(=CC(=C1O)OC)C2=C(OC3OC(CO)C(O)C(O)C3O)C(=O)C4=C(O2)C=C(O)C=C4O	83677.8	28441.5	16536.7	28072.9	60102.9	45674.3
POS_11063	[M+H]+	Syringin	0.16417	0.610629	0.172559	390.172	3.404		Organic oxygen compounds	Organooxygen compounds	Carbohydrates and carbohydrate conjugates	C17H24O9	QJVXKWHHAMZTBY-GCPOEHJPSA-N	COC1=C(OC2OC(CO)C(O)C(O)C2O)C(=CC(=C1)C=CCO)OC	5907.42	7659.02	3978.56	7330.09	13528.1	7874.47
POS_25885	[M+H]+	Syrosingopine	0.275308	0.201095	0.0991257	667.309	6.945		Alkaloids and derivatives	Yohimbine alkaloids		C35H42N2O11	ZCDNRPPFBQDQHR-UHFFFAOYNA-N	CCOC(=O)OC1=C(OC)C=C(C=C1OC)C(=O)OC2CC3CN4CCC5=C([NH]C6=C5C=CC(=C6)OC)C4CC3C(C2OC)C(=O)OC	1249.25	5568.65	385.959	9444.02	6315.79	20063.4
POS_10251	[M+H]+	Tangeretin	0.570931	0.759608	0.573998	373.139	7.884	C10190	Phenylpropanoids and polyketides	Flavonoids	O-methylated flavonoids	C20H20O7	ULSUXBXHSYSGDT-UHFFFAOYSA-N	COC1=CC=C(C=C1)C2=CC(=O)C3=C(O2)C(=C(OC)C(=C3OC)OC)OC	207698	175723	62773.7	151753	115208	320441
POS_13190	[M+H]+	Taraxasterol	2.49928	14.0054	0.382132	427.393	13.773		Lipids and lipid-like molecules	Prenol lipids	Triterpenoids		XWMMEBCFHUKHEX-ZJJHUPNDSA-N	C[C@H]1[C@@H]2[C@H]3CC[C@@H]4[C@@]5(C)CC[C@H](O)C(C)(C)[C@@H]5CC[C@@]4(C)[C@]3(C)CC[C@@]2(C)CCC1=C	2.48889e+06	63249.3	28896.2	50897.8	79133.3	54257.9
POS_19737	[M+Na]+	Telmisartan	0.186657	0.651778	0.497813	537.228	7.591	C07710	Benzenoids	Benzene and substituted derivatives	Biphenyls and derivatives	C33H30N4O2	RMMXLENWKUUMAY-UHFFFAOYSA-N	CCCC1=NC2=C(C)C=C(C=C2[N]1CC3=CC=C(C=C3)C4=C(C=CC=C4)C(O)=O)C5=NC6=C(C=CC=C6)[N]5C	1941.21	19241	4593.6	13649.2	18145.5	7752.22
POS_12463	[M+H]+	Tentoxin	0.161971	1.18577	0.482186	415.227	4.625		Organic acids and derivatives	Carboxylic acids and derivatives	Amino acids, peptides, and analogues	C22H30N4O4	SIIRBDOFKDACOK-LFXZBHHUSA-N	CC(C)C[C@@H]1NC(=O)[C@H](C)N(C)C(=O)CNC(=O)C(=C/C2=CC=CC=C2)/N(C)C1=O	39406.9	77509.5	68341.9	61908.1	48086.8	46239.3
POS_15936	[M+H]+	Terfenadine	0.479594	10.9925	0.137762	472.326	10.157	C07463	Benzenoids	Benzene and substituted derivatives	Diphenylmethanes	C32H41NO2	GUGOEEXESWIERI-UHFFFAOYSA-N	CC(C)(C)C1=CC=C(C=C1)C(O)CCCN2CCC(CC2)C(O)(C3=CC=CC=C3)C4=CC=CC=C4	10840.5	158905	92937.5	967.482	9091.99	13837
POS_14274	[M+H]+	Tetracycline	0.142498	1.11077	0.818762	445.165	5.061		Phenylpropanoids and polyketides	Tetracyclines		C22H24N2O8	JYHCQVWYCGHXGP-UHFFFAOYSA-N	CN(C)C1C2CC3C(=C(O)C4=C(C=CC=C4O)C3(C)O)C(=O)C2(O)C(=O)C(=C(N)O)C1=O	35926.8	24940.8	12426.3	35837.1	19018.6	11128.8
POS_10224	[M+H]+	Tetradecanoylcarnitine	0.112329	1.14971	0.673564	372.312	11.086		Lipids and lipid-like molecules	Fatty Acyls	Fatty acid esters	C21H41NO4	PSHXNVGSVNEJBD-LJQANCHMSA-N	CCCCCCCCCCCCCC(=O)O[C@H](CC([O-])=O)C[N+](C)(C)C	78601.3	117310	45619.2	51754	71188	87138.6
POS_9770	[M+H]+	Tetraethylene glycol monododecyl ether	1.26927	0.759724	0.480167	363.309	10.818		Organic oxygen compounds	Organooxygen compounds	Ethers	C20H42O5	WPMWEFXCIYCJSA-UHFFFAOYSA-N	CCCCCCCCCCCCOCCOCCOCCOCCO	124817	802939	570323	733701	594728	643444
POS_24052	[M+H]+	Tetrandrine	0.171706	1.65073	0.224535	623.299	11.372		Lignans, neolignans and related compounds			C38H42N2O6	WVTKBKWTSCPRNU-KYJUHHDHSA-N	COC1=C2OC3=CC=C(C[C@@H]4N(C)CCC5=CC(=C(OC6=C7[C@H](CC(=C2)C=C1)N(C)CCC7=CC(=C6OC)OC)C=C45)OC)C=C3	25504.8	35228.4	57934.5	25080.7	14674.9	32132.3
POS_24637	[M+H]+	Thalsimine	0.0488052	0.99772	0.994749	637.277	10.665		Phenylpropanoids and polyketides	Tannins		C38H40N2O7	YWNUNVSMOKMJMG-LJAQVGFWSA-N	COC1=C2OC3=CC=C(CC4=NCCC5=CC(=C(OC6=C(OC)C(=C(OC)C7=C6[C@H](CC(=C2)C=C1)N(C)CC7)OC)C=C45)OC)C=C3	32863.7	29866.4	42860.4	41696.2	14214	49921.6
POS_1974	[M+H]+	Theobromine	0.0704713	0.771387	0.669211	181.072	2.489	C07480	Organoheterocyclic compounds	Imidazopyrimidines	Purines and purine derivatives	C7H8N4O2	YAPQBXQYLJRXSA-UHFFFAOYSA-N	C[N]1C=NC2=C1C(=O)NC(=O)N2C	230.867	2428.32	2478.33	1072.29	1787.85	3799.96
POS_5003	[M]+	Thiamine	0.114962	1.17804	0.627961	265.109	14.381	C00378	Organoheterocyclic compounds	Diazines	Pyrimidines and pyrimidine derivatives	C12H17N4OS	JZRWCGZRTZMZEH-UHFFFAOYSA-N	CC1=NC(=C(C[N+]2=CSC(=C2C)CCO)C=N1)N	19056.8	11180.6	8262.79	8055.6	14282.9	10343
POS_10141	[M+H]+	Thioridazine	0.416492	0.830949	0.554343	371.166	3.821		Organoheterocyclic compounds	Benzothiazines	Phenothiazines	C21H26N2S2	KLBQZWRITKRQQV-UHFFFAOYSA-N	CSC1=CC2=C(SC3=C(C=CC=C3)N2CCC4CCCCN4C)C=C1	32986.5	116667	87793.6	104557	91582.5	89614.3
POS_8018	[M+H]+	Tiapride	0.193187	0.865927	0.498756	329.154	4.588		Benzenoids	Benzene and substituted derivatives	Benzenesulfonyl compounds	C15H24N2O4S	JTVPZMFULRWINT-UHFFFAOYSA-N	CCN(CC)CCNC(=O)C1=C(OC)C=CC(=C1)[S](C)(=O)=O	24385.2	29898	18576.2	22326.8	35407	26406.5
POS_7019	[M+H]+	Toddalolactone	1.22858	0.866133	0.762314	309.123	4.471					C16H20O6	GLWPLQBQHWYKRK-UHFFFAOYSA-N	CC(C)(C(CC1=C(C=C2C(=C1OC)C=CC(=O)O2)OC)O)O	99497.5	1.23511e+06	758620	898188	725288	793270
POS_22852	[M+H]+	Toosendanin	0.690204	0.798939	0.251328	597.232	4.748					C30H38O11	NAHTXVIXCMUDLF-RFNFAWMESA-N	CC(=O)O[C@@H]1C[C@@H]([C@@]23CO[C@H]([C@@]1([C@@H]2C[C@H]([C@@]4([C@@H]3C(=O)[C@@H]([C@@]5([C@]46[C@H](O6)C[C@H]5C7=COC=C7)C)OC(=O)C)C)O)C)O)O	208434	226891	128489	215151	218827	271725
POS_14315	[M+H]+	Topsentisterol A2	1.0151	0.820652	0.740882	445.366	13.059					C29H48O3	ZCQZIDOFCDVBNA-WDTQPNHXNA-N	OC1CCC2(C)C3CCC4(C)C(CCC4C53OOC2(C=C5)C1)C(C)CC(C)C(C)C(C)C	54329.7	1.1582e+06	1.36569e+06	754289	1.72377e+06	663607
POS_933	[M+H-H2O]+	trans-4-Hydroxycyclohexanecarboxylic acid	0.114643	0.748914	0.544758	145.084	2.184	C04404	Organic oxygen compounds	Organooxygen compounds	Alcohols and polyols	C7H12O3	HCFRWBBJISAZNK-UHFFFAOYSA-N	OC1CCC(CC1)C(O)=O	546.729	7404.34	4262.44	5209.69	6534.43	4564.18
POS_14387	[M+H]+	Trichodermamide C	0.146217	1.21808	0.0812267	447.146	2.408		Phenylpropanoids and polyketides	Coumarins and derivatives		C21H22N2O9	PCMUPOUDXMFDRE-NYGSYELISA-N	COC1=C(OC)C2=C(C=C1)C=C(N(C)C(=O)C3=NO[C@H]4[C@H](O)C=C[C@@H](O)[C@@]4(O)C3)C(=O)O2	64373.6	61159.5	71049.7	48766.7	61998.8	50622.6
POS_14148	[M+Na]+	Trichoverrol A	0.557401	0.955589	0.657799	443.204	5.955		Lipids and lipid-like molecules	Prenol lipids	Sesquiterpenoids	C23H32O7	QFKRKMXPKBHGGO-OYWHZMLYSA-N	C[C@H](O)[C@@H](O)\\C=C\\C=C/C(=O)O[C@@H]1C[C@H]2O[C@@H]3C=C(C)CC[C@]3(CO)[C@]1(C)[C@]24CO4	474123	617367	602788	604123	532355	636542
POS_17144	[M+H]+	Tricin 5-glucoside	0.510013	0.384933	0.145802	493.144	5.288		Phenylpropanoids and polyketides	Flavonoids	Flavonoid glycosides	C23H24O12	FLSOTPIEFVBPBU-LDBVRRDLSA-N	COC1=CC(=CC(=C1O)OC)C2=CC(=O)C3=C(OC4OC(CO)C(O)C(O)C4O)C=C(O)C=C3O2	19944.4	17930.6	15407.5	14871.2	59511.5	64037.6
POS_1122	[M+H]+	Triethanolamine	0.0737564	0.99544	0.939913	150.109	14.379	C06771	Organic nitrogen compounds	Organonitrogen compounds	Amines	C6H15NO3	GSEJCLTVZPLZKY-UHFFFAOYSA-N	OCCN(CCO)CCO	26926.5	27796.2	29875.1	26729.1	31016.6	27239.7
POS_2030	[M+H]+	Triethyl phosphate	0.250354	3.07451	0.391673	183.065	2.729		Organic acids and derivatives	Organic phosphoric acids and derivatives	Phosphate esters	C6H15O4P	DQWPFSLDHJDLRL-UHFFFAOYSA-N	CCO[P](=O)(OCC)OCC	30259.4	5038.05	2550.6	3593.65	3379.95	5336.69
POS_1543	[M+H]+	Triethylene glycol monomethyl ether	0.068062	1.02989	0.851698	165.111	2.708		Organic oxygen compounds	Organooxygen compounds	Ethers	C7H16O4	JLGLQAWTXXGVEM-UHFFFAOYSA-N	COCCOCCOCCO	16442.3	24922.1	25251.4	22430.6	18706.6	23544.9
POS_12078	[M+H]+	Trifloxystrobin	4.69099	1.70339	0.617253	409.139	8.832		Benzenoids	Benzene and substituted derivatives	Trifluoromethylbenzenes	C20H19F3N2O4	ONCZDRURRATYFI-TVJDWZFNSA-N	CO\\N=C(\\C(=O)OC)C1=CC=CC=C1CO\\N=C(/C)C2=CC(=CC=C2)C(F)(F)F	68827.2	9.9135e+06	7.95631e+06	1.03749e+07	98489.6	57734.2
POS_11308	[M+H]+	Trifloxystrobin acid	0.669007	2.52828	0.24307	395.121	7.956		Benzenoids	Benzene and substituted derivatives	Trifluoromethylbenzenes	C19H17F3N2O4	ISZQNKFXNXQTTF-NACSPRHISA-N	CO\\N=C(\\C(O)=O)C1=CC=CC=C1CO\\N=C(/C)C2=CC=CC(=C2)C(F)(F)F	65375.2	127563	139574	130307	808.238	401.984
POS_15729	[M+Na]+	Trifolirhizin	0.0723681	1.78805	0.361085	469.109	4.161		Phenylpropanoids and polyketides	Isoflavonoids	Furanoisoflavonoids		VGSYCWGXBYZLLE-QEEQPWONSA-N	OCC1OC(OC2=CC=C3C4OC5=CC6=C(OCO6)C=C5C4COC3=C2)C(O)C(O)C1O	12169.9	32174.9	11035.3	2601.5	13213.8	15157.1
POS_5084	[M+H]+	Triisobutyl phosphate	0.585377	0.629836	0.132708	267.172	9.295		Organic acids and derivatives	Organic phosphoric acids and derivatives	Phosphate esters	C12H27O4P	HRKAMJBPFPHCSD-UHFFFAOYSA-N	CC(C)CO[P](=O)(OCC(C)C)OCC(C)C	39253.1	77066.8	69005.7	68141.8	119793	106310
POS_2	[M+H-2H2O]+	Trimethylamine	0.740381	0.738788	0.560009	60.0799	1.114	C00565	Organic nitrogen compounds	Organonitrogen compounds	Amines	C3H9N	GETQZCLCWQTVFV-UHFFFAOYSA-N	CN(C)C	14.1912	260978	210153	283400	170382	183945
POS_1393	[M+H]+	Trinoranastreptene	1.26136	0.878425	0.382478	161.131	7.947					C12H16	GOAGZWVCKOCSLC-KNBWJCJHNA-N	C1=CC23C(=CCC2C3(C)CC1)C	896130	1.29487e+06	1.04805e+06	1.34584e+06	1.03291e+06	1.30859e+06
POS_7895	[M+H]+	Triphenyl phosphate	0.197508	0.942905	0.639379	327.077	8.741	C06017	Organic acids and derivatives	Organic phosphoric acids and derivatives	Phosphate esters	C18H15O4P	XZZNDPSIHUTMOC-UHFFFAOYSA-N	O=[P](OC1=CC=CC=C1)(OC2=CC=CC=C2)OC3=CC=CC=C3	79368.5	57830.4	58967.7	66109.5	65598.9	76336.5
POS_5568	[M+H]+	Triphenylphosphine oxide	0.24453	0.893588	0.669623	279.094	7.209		Benzenoids	Benzene and substituted derivatives	Phenylphosphines and derivatives	C18H15OP	FIQMHBFVRAXMOP-UHFFFAOYSA-N	O=[P](C1=CC=CC=C1)(C2=CC=CC=C2)C3=CC=CC=C3	51777.2	61096.5	66982.4	96420	56869.8	47984.2
POS_9547	[M+H]+	Triptonide	0.215959	1.04052	0.906782	359.146	6.324					C20H22O6	SWOVVKGLGOOUKI-ZHGGVEMFSA-N	CC(C)[C@@]12[C@@H](O1)[C@H]3[C@@]4(O3)[C@]5(CCC6=C([C@@H]5C[C@H]7[C@]4(C2=O)O7)COC6=O)C	93669.4	64072.1	36566.3	48718	52433.2	85589.4
POS_7886	[M+H]+	Tris(1-chloro-2-propyl)phosphate	0.0729393	1.07027	0.389796	327.006	7.539		Organic acids and derivatives	Organic phosphoric acids and derivatives	Phosphate esters	C9H18Cl3O4P	KVMPUXDNESXNOH-UHFFFAOYSA-N	CC(CCl)O[P](=O)(OC(C)CCl)OC(C)CCl	107405	87063.9	98485.5	96671.4	91116.6	85931.3
POS_11569	[M+H]+	Tris(2-butoxyethyl) phosphate	0.229546	1.03579	0.723217	399.25	9.615		Organic acids and derivatives	Organic phosphoric acids and derivatives	Phosphate esters	C18H39O7P	WTLBZVNBAKMVDP-UHFFFAOYSA-N	CCCCOCCO[P](=O)(OCCOCCCC)OCCOCCCC	371412	305919	276905	307444	294068	319752
POS_1383	[M+H]+	Tryptamine	0.828506	2.44328	0.237671	161.105	3.375	C00398	Organoheterocyclic compounds	Indoles and derivatives	Tryptamines and derivatives	C10H12N2	APJYDQYYACXCRM-UHFFFAOYSA-N	NCCC1=C[NH]C2=C1C=CC=C2	384134	292921	62575.8	111327	21385.6	170008
POS_903	[M+H-H2O]+	Tryptophol	0.793882	1.22605	0.650522	144.08	3.359	C00955	Organoheterocyclic compounds	Indoles and derivatives	Indoles	C10H11NO	MBBOMCVGYCRMEA-UHFFFAOYSA-N	OCCC1=C[NH]C2=CC=CC=C12	2.44821e+06	2.80012e+06	689571	1.00183e+06	2.25481e+06	1.58649e+06
POS_23402	[M+Na]+	Tulipanin	0.134194	0.890641	0.677114	609.422	11.759	C16315	Phenylpropanoids and polyketides	Flavonoids	Flavonoid glycosides	C27H31O16	PLKUTZNSKRWCCA-LTSKFBHWSA-O	C[C@@H]1O[C@@H](OC[C@H]2O[C@@H](OC3=C([O+]=C4C=C(O)C=C(O)C4=C3)C5=CC(=C(O)C(=C5)O)O)[C@H](O)[C@@H](O)[C@@H]2O)[C@H](O)[C@H](O)[C@H]1O	14601.7	26153	39045.9	27004.6	33176.8	29417.6
POS_21553	[M]+*	Tunaxanthin	0.537892	0.837728	0.576565	568.425	12.398					C40H56O2	BIPAHAFBQLWRMC-DKLMTRRASA-N	C/C(=C\C=C\C=C(/C)\C=C\C=C(/C)\C=C\C1C(=CC(CC1(C)C)O)C)/C=C/C=C(\C)/C=C/C2C(=CC(CC2(C)C)O)C	55098.8	204515	161828	167025	157827	178225
POS_782	[M+H]+	Tyramine	0.102858	1.51977	0.207168	138.09	2.064	C00483	Benzenoids	Benzene and substituted derivatives	Phenethylamines	C8H11NO	DZGWFCGJZKJUFP-UHFFFAOYSA-N	NCCC1=CC=C(O)C=C1	7215.87	5116.86	3334.95	3592.6	2693.1	4023.54
POS_2015	[M+H]+	Tyrosine	0.231477	0.533418	0.189382	182.081	1.244	C00082	Organic acids and derivatives	Carboxylic acids and derivatives	Amino acids, peptides, and analogues	C18H32O7	OUYCCCASQSFEME-QMMMGPOBSA-N	NC(CC1=CC=C(O)C=C1)C(O)=O	13019.9	5664.61	4761.45	7839.34	18993.4	17121.5
POS_249	[M+H]+	Uracil	0.041123	1.08817	0.669453	113.023	1.259	C00106	Organoheterocyclic compounds	Diazines	Pyrimidines and pyrimidine derivatives	C4H4N2O2	ISAKRJDGNUQOIC-UHFFFAOYSA-N	OC1=NC(=NC=C1)O	20047.2	23574	12908.3	16168	16296.1	19485
POS_4259	[M+H]+	Uridine	0.0268903	1.03822	0.886982	245.078	1.254	C00299	Nucleosides, nucleotides, and analogues	Pyrimidine nucleosides		C9H12N2O6	DRTQHJPVMGBUCF-XVFCMESISA-N	OCC1OC(C(O)C1O)N2C=CC(=NC2=O)O	10920.5	7953.51	4646.92	8203.05	6368.62	8083.34
POS_1473	[M+H]+	Valerophenone	0.25596	0.814951	0.513876	163.109	6.882		Organic oxygen compounds	Organooxygen compounds	Carbonyl compounds	C11H14O	XKGLSKVNOSHTAD-UHFFFAOYSA-N	CCCCC(=O)C1=CC=CC=C1	14257.5	41937.1	28603.3	40910.7	36124.8	27017.2
POS_1203	[M+H]+	Vanillin	0.0439551	1.40534	0.678249	153.053	4.124	C00755	Benzenoids	Phenols	Methoxyphenols	C8H8O3	MWOOGOJBHIARFG-UHFFFAOYSA-N	COC1=CC(=CC=C1O)C=O	17415	68270.6	8721.63	9478.88	19948.6	37749.8
POS_8536	[M+Na]+	Verimol A	0.233358	0.903876	0.661499	339.12	7.487		Benzenoids	Benzene and substituted derivatives	Benzoic acids and derivatives	C18H20O5	MHJLKHNHGMUAPQ-UHFFFAOYSA-N	COC1=CC=C(C=C1)C(O)C(C)OC(=O)C2=CC=C(OC)C=C2	41669.5	50157.2	24934.8	33784.3	48891.6	46502.6
POS_7032	[M+H]+	Vincanidine	0.179433	0.504626	0.182853	309.152	3.892		Alkaloids and derivatives	Strychnos alkaloids		C19H20N2O2	JDOFCMASVRMYJU-JYTRXFNOSA-N	C\\C=C1\\CN2CC[C@@]34[C@@H]2C[C@@H]1C(=C3NC5=C4C=CC=C5O)C=O	402.064	5726.07	6142.35	5495.51	11233.3	7587.23
POS_15047	[M+H]+	Vindoline	0.418844	0.681105	0.353111	457.233	6.899					C25H32N2O6	CXBGOBGJHGGWIE-LAVVCGCLSA-N	CC[C@]12C=CCN3[C@H]1[C@@]4(CC3)[C@@H]([C@@]([C@H]2OC(=O)C)(C(=O)OC)O)N(C5=C4C=CC(=C5)OC)C	6347.04	63255.9	45639	49928.4	58863	60407
POS_9153	[M+H]+	Vinpocetine	0.497736	0.678469	0.366347	351.21	7.049		Alkaloids and derivatives	Eburnan-type alkaloids		C22H26N2O2	DDNCQMVWWZOMLN-UHFFFAOYSA-N	CCOC(=O)C1=CC2(CC)CCCN3CCC4=C(C23)[N]1C5=CC=CC=C45	133663	115797	89836.2	199467	66471.5	234153
POS_11473	[M+H]+	Vitamin D2	0.260303	0.706219	0.166646	397.345	12.969					C28H44O	VERALBDTRFBBCN-UHFFFAOYSA-N	CC1CC(CC(CC2CC(CC(C3=CC=C(C=C3)C(C(CC(CC(CC(CC(CC(CC(C4=CC=C1C=C4)C)C5=CC6=C(C=C5)OCCOCCOCCOCCOCCO6)C7=CC8=C(C=C7)OCCOCCOCCOCCOCCO8)C9=CC1=C(C=C9)OCCOCCOCCOCCOCCO1)C1=CC3=C(C=C1)OCCOCCOCCOCCOCCO3)C1=CC3=C(C=C1)OCCOCCOCCOCCOCCO3)C1=CC3=C(C=C1)OCCOCCOCCOCCOCCO3)C)C)C1=CC3=C(C=C1)OCC1(COCCOCCOCCOC4=C(C=C2C=C4)OCCO1)OCCOCCOCCOCCO3)C1=CC2=C(C=C1)OCCOCCOCCOCCOCCO2)C1=CC2=C(C=C1)OCCOCCOCCOCCOCCO2	8814.84	22555.7	18788.7	23602.4	23000.8	24421.9
POS_10855	[M+H]+	Vitamin D3	0.601419	0.506083	0.233725	385.344	12.131					C27H44O	QYSXJUFSXHHAJI-YRZJJWOYSA-N	C[C@H](CCCC(C)C)[C@H]1CC[C@@H]\\2[C@@]1(CCC/C2=C\\C=C/3\\C[C@H](CCC3=C)O)C	106998	96409.3	102057	266492	277450	59643.6
POS_16037	[M+H]+	Vitamin E acetate	0.123859	0.850868	0.583002	473.397	13.42		Lipids and lipid-like molecules	Prenol lipids	Quinone and hydroquinone lipids	C31H52O3	ZAKOWWREFLAJOT-UHFFFAOYSA-N	CC(C)CCCC(C)CCCC(C)CCCC1(C)CCC2=C(O1)C(=C(C)C(=C2C)OC(C)=O)C	32163.5	29593.5	57752.2	52882.6	55668.1	31905.1
POS_22075	[M+H]+	Vitexin 2''-O-rhamnoside	0.105181	0.717222	0.438166	579.181	5.11		Phenylpropanoids and polyketides	Flavonoids	Flavonoid glycosides	C27H30O14	LYGPBZVKGHHTIE-HUBYJIGHSA-N	CC1OC(OC2C(O)C(O)C(CO)OC2C3=C(O)C=C(O)C4=C3OC(=CC4=O)C5=CC=C(O)C=C5)C(O)C(O)C1O	926.431	5341.16	3028.09	4915.28	4976.01	3069.38
POS_3914	[M-H2O+H]+	Walleminone	0.641562	0.874728	0.756278	235.168	5.719		Lipids and lipid-like molecules	Prenol lipids	Sesquiterpenoids	C15H24O3	NGQXJSTYWWTPOG-VGYDOTAVSA-N	C[C@H]1[C@H](O)[C@H](O)CC(=C)[C@@H]2CC(C)(C)[C@@H]2CC1=O	72539	303652	216521	320559	215798	141239
POS_14948	[M+H]+	Wilforlide A	1.98769	0.670695	0.22303	455.349	11.234					C30H46O3	HHQJBWYXBWOFJY-ACXVHNPGSA-N	C[C@]12CC[C@@H](C([C@@H]1CC[C@@]3([C@@H]2CC=C4[C@]3(CC[C@@]5([C@H]4C[C@@]6(C[C@@H]5OC6=O)C)C)C)C)(C)C)O	396743	1.18815e+06	853795	913363	1.435e+06	1.28769e+06
POS_10441	[M+Na]+	Xanthohumol	0.378774	0.851464	0.896622	377.141	2.653	C16417	Phenylpropanoids and polyketides	Linear 1,3-diarylpropanoids	Chalcones and dihydrochalcones	C21H22O5	ORXQGKIUCDPEAJ-YRNVUSSQSA-N	COC1=CC(=C(CC=C(C)C)C(=C1C(=O)C=CC2=CC=C(O)C=C2)O)O	226049	26010.4	16840.7	19622.4	285283	10903.2
POS_4800	[M+H]+	Xanthoxyletin	0.279977	1.198	0.395536	259.093	7.241		Phenylpropanoids and polyketides	Coumarins and derivatives	Pyranocoumarins	C15H14O4	JSJIIHRNDMLJGK-UHFFFAOYSA-N	COC1=C2C=CC(=O)OC2=CC3=C1C=CC(C)(C)O3	186666	184357	103996	140350	130558	125602
POS_2444	[M+H]+	Xanthoxylin	0.364271	0.763541	0.567865	197.078	4.849	C10726	Organic oxygen compounds	Organooxygen compounds	Carbonyl compounds	C10H12O4	FBUBVLUPUDBFME-UHFFFAOYSA-N	COC1=CC(=C(C(C)=O)C(=C1)O)OC	1341.08	72652.3	66564.7	65796.8	51595.1	66695.4
POS_2802	[M+H]+	Xanthurenic acid	0.0365373	0.973612	0.928185	206.044	2.021	C02470	Organoheterocyclic compounds	Quinolines and derivatives	Quinoline carboxylic acids	C10H7NO4	FBZONXHGGPHHIY-UHFFFAOYSA-N	OC(=O)C1=NC2=C(O)C=CC=C2C(=C1)O	781.579	1946.82	1118.09	1493.15	1332.21	1125.38
POS_10515	[M+Na]+	xi-3-Hydroxy-5-phenylpentanoic acid O-beta-D-Glucopyranoside	0.720462	0.758457	0.343042	379.138	3.804		Lipids and lipid-like molecules	Fatty Acyls	Fatty acyl glycosides	C17H24O8	HRYIDVZLDQBLFF-UHFFFAOYSA-N	OCC1OC(OC(CCC2=CC=CC=C2)CC(O)=O)C(O)C(O)C1O	502741	340877	164976	460080	402765	466952
POS_1214	[M+H]+	Xylitol	0.162461	0.965025	0.880364	153.075	1.089	C00379	Organic oxygen compounds	Organooxygen compounds	Carbohydrates and carbohydrate conjugates	C5H12O5	HEBKCHPVOIAQTA-NGQZWQHPSA-N	OC[C@H](O)C(O)[C@H](O)CO	45094.6	44845.5	34357.6	37744.5	31201.8	59856.3
POS_8680	[M+H]+	Yohimbic Acid	1.08281	0.520629	0.261988	341.191	8.488		Alkaloids and derivatives	Corynanthean-type alkaloids		C20H24N2O3	AADVZSXPNRLYLV-UHFFFAOYNA-N	OC1CCC2CN3CCC4=C([NH]C5=CC=CC=C45)C3CC2C1C(O)=O	11378.6	174325	535823	570911	333486	481478
POS_9372	[M+H]+	Yohimbine	0.117533	0.534006	0.0754361	355.188	3.76	C09256	Alkaloids and derivatives	Yohimbine alkaloids		C21H26N2O3	BLGXFZZNTVWLAY-SCYLSFHTSA-N	COC(=O)[C@H]1[C@@H](O)CC[C@H]2CN3CCC4=C([NH]C5=CC=CC=C45)[C@@H]3C[C@H]12	526.016	2511.26	2127.55	3022.99	3546.85	3102.02
POS_7535	[M+H]+	Zearalenone	0.19488	0.909244	0.542714	319.134	2.713		Phenylpropanoids and polyketides	Macrolides and analogues	Zearalenones	C18H22O5	MBMQEIFVQACCCH-QBODLPLBSA-N	C[C@H]1CCCC(=O)CCCC=CC2=C(C(=CC(=C2)O)O)C(=O)O1	27821.4	44031.8	41638.9	46065.7	37055.5	41699.1
POS_20016	[M+H]+	zeta-Carotene	0.145462	0.929099	0.896897	541.472	13.168	C05430	Lipids and lipid-like molecules	Prenol lipids	Tetraterpenoids	C40H60	BIWLELKAFXRPDE-WTXAYMOSSA-N	CC(C)=CCC\\C(C)=C\\CC\\C(C)=C\\C=C\\C(C)=C\\C=C\\C=C(C)\\C=C\\C=C(C)\\CC\\C=C(C)\\CCC=C(C)C	7748.9	33780.5	8025.17	19426.2	21924.9	11985
POS_3224	[M-H2O+H]+	Zizanoic acid	1.25243	0.555181	0.134505	217.156	7.185		Lipids and lipid-like molecules	Prenol lipids	Sesquiterpenoids	C15H22O2	IJGMVUXEZUEDJR-RTWAVKEYSA-N	CC1(C)C2CCC3(C2)C(CCC3C1=C)C(O)=O	491789	165809	301808	426874	763324	537901
