# Supplementary material for: Integration analysis of transcriptome and metabolome reveals role of piceatannol in regulation of fruit drop in Chinese bayberry (Morella rubra Sieb. et Zucc.)
Source: Research Square preprint supplement (doi:10.21203/rs.3.rs-7503570/v1), 2025-10-09
Supplement: Supplementary file 3 [file b80819ee9dd59e1fe920e35e.xlsx]

## Sheet: Table S2
Supplemental Table S2. Information of 636 metabolites in peduncles from the plants treated with 2,4-D compared with the contrast under negative ion mode.
Table legend:
ID	ID of metabolites identified in mass spectrometry detection
adduct	Addition ion information of compounds
Name	Name of identified metabolites
VIP	Variable Importance for the Projection
A	Content of metabolites identified in peduncles from the blank control
B	Content of metabolites identified in peduncles treated with 2,4-D
FoldChange	Fold change value of each metabolite
p-value	Wald test p-value
ID	adduct	Name	VIP	Fold change	p-value	m/z	rt(min)	KEGG	Superclass	Class	Subclass	Formula	INCHIKEY	SMILES	A2-1	A2-2	A2-3	B2-1	B2-2	B2-3
NEG_52688	[M-H]-	Gypenoside XLIX	1.28235	0.286288	0.00811043	1045.55	9.966					C52H86O21	AFEVCSJFNQWWDF-AZFNEDKCSA-N	C[C@H]1[C@@H]([C@H]([C@H]([C@@H](O1)O[C@@H]2[C@H]([C@H](CO[C@H]2O[C@H]3CC[C@@]4([C@H]5CC[C@@H]6[C@H](CC[C@]6([C@@]5(CC[C@H]4C3(C)C)C)C)[C@@](CCC=C(C)C)(CO[C@H]7[C@@H]([C@H]([C@@H]([C@H](O7)CO)O)O)O)O)C=O)O)O[C@H]8[C@@H]([C@H]([C@@H](CO8)O)O)O)O)O)O	23775.5	379956	216190	766483	693809	705085
NEG_4350	[M-H]-	7-Hydroxy-5-methoxy-2-phenylchroman-4-one	10.1168	0.573478	0.0296547	269.081	8.257		Phenylpropanoids and polyketides	Flavonoids	O-methylated flavonoids	C16H14O4	QQQCWVDPMPFUGF-UHFFFAOYSA-N	COC1=C2C(=O)CC(OC2=CC(=C1)O)C3=CC=CC=C3	4.21912e+07	8.44873e+07	8.36133e+07	1.2422e+08	1.08707e+08	1.33769e+08
NEG_3449	[M-H]-	Piceatannol	1.44117	0.333326	0.0312311	243.066	5.117	C05901	Phenylpropanoids and polyketides	Stilbenes		C14H12O4	CDRPUGZCRXZLFL-OWOJBTEDSA-N	OC1=CC(=CC(=C1)O)C=CC2=CC=C(O)C(=C2)O	1670.92	638120	516743	898027	1.22229e+06	1.34936e+06
NEG_3220	[M-H]-	Dihydroartemisinic acid	1.06351	0.330822	0.0428174	235.171	10.049					C15H24O2	JYGAZEJXUVDYHI-DGTMBMJNSA-N	C[C@@H]1CC[C@H]([C@@H]2[C@H]1CCC(=C2)C)[C@@H](C)C(=O)O	6098.18	373134	237732	676731	748216	439997
NEG_4899	[M-H]-	3'-O-Methylinosine	1.47528	0.261372	0.046214	281.081	8.684					C11H14N4O5	ABXDBVMGRKZFRC-VTFQDDHLSA-N	OC1=NC=NC2=C1N=CN2C3OC(CO)C(OC)C3O	3550.46	502410	335903	618728	1.4103e+06	1.1919e+06
NEG_14100	[M-H]-	(-)-Catechin gallate	4.02004	0.411087	0.0570751	441.086	4.085		Phenylpropanoids and polyketides	Flavonoids	Flavans	C22H18O10	LSHVYAFMTMFKBA-CTNGQTDRSA-N	OC1=CC2=C(CC(OC(=O)C3=CC(=C(O)C(=C3)O)O)C(O2)C4=CC=C(O)C(=C4)O)C(=C1)O	2311.48	7.86755e+06	5.81242e+06	9.66249e+06	1.20927e+07	1.1528e+07
NEG_4505	[M-H]-	Naringenin	1.90053	0.43812	0.0656767	271.064	5.988	C00509	Phenylpropanoids and polyketides	Flavonoids	Flavans	C15H12O5	FTVWIRXFELQLPI-ZDUSSCGKSA-N	OC1=CC=C(C=C1)[C@@H]2CC(=O)C3=C(O2)C=C(O)C=C3O	45647.5	1.99051e+06	1.3794e+06	2.51085e+06	2.51637e+06	2.76873e+06
NEG_15393	[M-H]-	(-)-Epigallocatechin gallate	5.91894	0.417004	0.0720222	457.077	3.385	C09731	Phenylpropanoids and polyketides	Flavonoids	Flavans		WMBWREPUVVBILR-WIYYLYMNSA-N	OC1=CC2=C(CC(OC(=O)C3=CC(=C(O)C(=C3)O)O)C(O2)C4=CC(=C(O)C(=C4)O)O)C(=C1)O	5361.69	1.85774e+07	1.13472e+07	2.16133e+07	2.77704e+07	2.23901e+07
NEG_1707	[M-H]-	D-Glucose	3.02507	0.37867	0.0735334	179.057	1.105	C00221	Organic oxygen compounds	Organooxygen compounds	Carbohydrates and carbohydrate conjugates	C6H12O6	WQZGKKKJIJFFOK-GASJEMHNSA-N	OC[C@H]1OC(O)[C@H](O)[C@@H](O)[C@@H]1O	68.7012	4.07719e+06	2.63215e+06	4.03969e+06	7.10061e+06	6.57805e+06
NEG_6058	[M-H]-	Angoletin	1.69748	0.510929	0.0830994	299.119	9.368		Phenylpropanoids and polyketides	Linear 1,3-diarylpropanoids	Chalcones and dihydrochalcones	C18H20O4	HBRYKWADRULLHU-UHFFFAOYSA-N	COC1=C(C(=O)CCC2=CC=CC=C2)C(=C(C)C(=C1C)O)O	450605	2.04611e+06	1.65849e+06	2.6378e+06	2.19798e+06	3.29686e+06
NEG_5493	[M-H]-	(-)-Epicatechin	1.01644	0.122057	0.0954834	289.072	3.001	C09727	Phenylpropanoids and polyketides	Flavonoids	Flavans	C15H14O6	PFTAWBLQPZVEMU-UKRRQHHQSA-N	OC1CC2=C(OC1C3=CC=C(O)C(=C3)O)C=C(O)C=C2O	480.073	109590	52870	132202	744936	457814
NEG_14096	[M-H]-	(-)-Epicatechin gallate	3.16614	9.10079	0.398276	441.084	4.204		Phenylpropanoids and polyketides	Flavonoids	Flavans	C22H18O10	LSHVYAFMTMFKBA-TZIWHRDSSA-N	OC1=CC2=C(CC(OC(=O)C3=CC(=C(O)C(=C3)O)O)C(O2)C4=CC=C(O)C(=C4)O)C(=C1)O	1.01583e+07	230582	176921	387549	404434	368994
NEG_15576	[M+FA-H]-	(-)-Podophyllotoxin	0.211609	0.48558	0.0627301	459.135	5.49					C22H22O8	YJGVMLPVUAXIQN-UHFFFAOYNA-N	O=C1OCC2C(O)C3=CC=4OCOC4C=C3C(C5=CC(OC)=C(OC)C(OC)=C5)C12	7868.54	28392	23099.1	29967.6	46948.6	45328.7
NEG_27090	[M-H]-	(+)-7-Epi-Syringaresinol 4'-glucoside	0.218845	0.567647	0.273981	579.207	4.891		Lignans, neolignans and related compounds	Lignan glycosides		C28H36O13	WEKCEGQSIIQPAQ-UHFFFAOYSA-N	COC1=CC(=CC(=C1O)OC)C2OCC3C2COC3C4=CC(=C(OC5OC(CO)C(O)C(O)C5O)C(=C4)OC)OC	227.959	59654.3	33151.4	48481.1	69035.3	46377.1
NEG_5487	[M-H]-	(+)-Epicatechin	0.432811	0.45398	0.042224	289.07	4.091	C09728	Phenylpropanoids and polyketides	Flavonoids	Flavans	C15H14O6	PFTAWBLQPZVEMU-ZFWWWQNUSA-N	O[C@H]1CC2=C(O[C@H]1C3=CC(=C(O)C=C3)O)C=C(O)C=C2O	32620.9	93459.6	63356.8	111457	175238	130587
NEG_8740	[M-H]-	(+)-Usnic acid	0.561487	0.0103469	0.324937	343.081	9.051		Benzenoids	Benzene and substituted derivatives	Acetophenones	C18H16O7	WEYVVCKOOFYHRW-UHFFFAOYSA-N	CC(=O)C1=C(O)C=C2OC3=C(C(C)=O)C(=C(C)C(=C3C2(C)C1=O)O)O	0	1399.03	4662.1	224.073	46672.2	538896
NEG_6999	[M-C6H10O5-H]-	(12Z)-9,10-Dihydroxyoctadec-12-enoic acid	0.0770148	1.34236	0.777685	313.236	9.017	C14828	Lipids and lipid-like molecules	Fatty Acyls	Fatty acids and conjugates	C18H34O4	XEBKSQSGNGRGDW-YFHOEESVSA-N	CCCCC\\C=C/CC(O)C(O)CCCCCCCC(O)=O	2573.25	21000.9	2759.01	2116.61	2578.2	14922.2
NEG_8006	[M-H]-	(15Z)-9,12,13-Trihydroxy-15-octadecenoic acid	0.174548	0.504175	0.339454	329.231	7.13		Lipids and lipid-like molecules	Fatty Acyls	Fatty acids and conjugates	C18H34O5	DNWUYCUUEGGVPR-CLTKARDFSA-N	CCC=CCC(O)C(O)CCC(O)CCCCCCCC(O)=O	25718.8	9528.32	15109.6	35733.6	7092.98	57052.9
NEG_11342	[M-H]-	(17-Acetyl-10,13-dimethyl-2,3,4,7,8,9,11,12,14,15,16,17-dodecahydro-1H-cyclopenta[a]phenanthren-3-yl) hydrogen sulfate	0.119613	0.635486	0.410505	395.184	10.692		Lipids and lipid-like molecules	Steroids and steroid derivatives	Sulfated steroids	C21H32O5S	DIJBBUIOWGGQOP-UHFFFAOYSA-N	CC(=O)C1CCC2C3CC=C4CC(CCC4(C)C3CCC12C)O[S](O)(=O)=O	447.607	20307.4	16308.3	21688.6	10279.3	26354.8
NEG_18216	[M-H]-	(1R,2S,5aR,5bR,7aS,10R,12bR)-2-Hydroxy-10-isopropenyl-3,3,5a,5b,12b-pentamethyloctadecahydrodicyclopenta[a,i]phenanthrene-1,7a(1H)-dicarboxylic acid	0.313859	0.5801	0.376545	485.323	8.748		Lipids and lipid-like molecules	Prenol lipids	Triterpenoids	C30H46O5	WLCHQSHZHFLMJH-GAVPBTRYSA-N	CC(=C)C1CCC2(CCC3(C)C(CCC4C5(C)C(CCC34C)C(C)(C)C(O)C5C(O)=O)C12)C(O)=O	33576.3	142232	31824.8	53098.2	134112	170717
NEG_31421	[M-H]-	(1S,2R,4As,6aR,6bR,10S,12aR,14bS)-1,2,6b,9,9,12a-hexamethyl-10-[(2R,3R,4S,5S,6R)-3,4,5-trihydroxy-6-methyloxan-2-yl]oxy-2,3,4,5,6,6a,7,8,8a,10,11,12,13,14b-tetradecahydro-1H-picene-4a,6a-dicarboxylic acid	0.251628	1.17036	0.676447	631.367	9.541		Lipids and lipid-like molecules	Prenol lipids	Terpene glycosides	C36H56O9	PUOQHFWXBKTHST-MPLMROMBSA-N	CC1CCC2(CCC3(C(O)=O)C(=CCC4C5(C)CCC(OC6OC(C)C(O)C(O)C6O)C(C)(C)C5CCC34C)C2C1C)C(O)=O	121416	120964	38160.4	62283.1	103612	73808.1
NEG_15299	[M-H]-	(1S,2R,4As,6aS,6bR,10S,12aR)-10-hydroxy-1,2,6a,6b,9,9,12a-heptamethyl-2,3,4,5,6,6a,7,8,8a,10,11,12,13,14b-tetradecahydro-1H-picene-4a-carboxylic acid	1.29977	1.42743	0.584611	455.35	12.021		Lipids and lipid-like molecules	Prenol lipids	Triterpenoids	C30H48O3	WCGUUGGRBIKTOS-POPPTPIPSA-N	CC1CCC2(CCC3(C)C(=CCC4C5(C)CCC(O)C(C)(C)C5CCC34C)C2C1C)C(O)=O	2.48324e+06	781382	531989	532179	1.07094e+06	1.05664e+06
NEG_25709	[M+HCOO]-	(2-Hydroxy-3-octadeca-9,12-dienoyloxypropyl) 2-(trimethylazaniumyl)ethyl phosphate	0.542397	11.6548	0.384582	564.33	10.861		Lipids and lipid-like molecules	Glycerophospholipids	Glycerophosphocholines	C26H50NO7P	SPJFYYJXNPEZDW-UHFFFAOYSA-N	CCCCCC=CCC=CCCCCCCCC(=O)OCC(O)CO[P]([O-])(=O)OCC[N+](C)(C)C	291477	7360.06	5414.78	12427.8	7796.74	5880.79
NEG_25552	[M+HCOO]-	(2-Hydroxy-3-octadeca-9,12,15-trienoyloxypropyl) 2-(trimethylazaniumyl)ethyl phosphate	0.158505	0.810996	0.808814	562.311	10.421		Lipids and lipid-like molecules	Glycerophospholipids	Glycerophosphocholines	C26H48NO7P	WKQNRCYKYCKESD-UHFFFAOYSA-N	CCC=CCC=CCC=CCCCCCCCC(=O)OCC(O)CO[P]([O-])(=O)OCC[N+](C)(C)C	57030	12865.1	2761.76	35999.9	2927.85	50661.9
NEG_33162	[M-H]-	(2E,6E,10E)-14-{[2-O-(beta-D-Glucopyranosyl)-beta-D-glucopyranosyl]oxy}-4-hydroxy-2,6,10,14-tetramethyl-2,6,10,15-hexadecatetraenoic acid	0.188789	5.74209	0.35429	659.324	7.367		Lipids and lipid-like molecules	Fatty Acyls	Fatty acyl glycosides	C32H52O14	ISQUNAAALVXWGI-PGEVILJJSA-N	CC(CCC=C(C)CC(O)C=C(C)C(O)=O)=CCCC(C)(OC1OC(CO)C(O)C(O)C1OC2OC(CO)C(O)C(O)C2O)C=C	34321.1	3453.95	2184.95	2645.89	1958.05	2355.19
NEG_47732	[M+Cl]-	(2R,3R,4R,5R,6S)-2-[(4S,6R,7S,8R,9S,13R,14R,16R)-14-[(2R,3R,4S,5R,6R)-4,5-dihydroxy-6-methyl-3-[(2S,3R,4R,5R,6S)-3,4,5-trihydroxy-6-methyloxan-2-yl]oxyoxan-2-yl]oxy-7,9,13-trimethyl-5'-methylidenespiro[5-oxapentacyclo[10.8.0.02,9.04,8.013,18]icos-18-ene-6,2'-oxane]-16-yl]oxy-6-methyloxane-3,4,5-triol	0.0405086	1.3869	0.467211	901.448	9.899		Lipids and lipid-like molecules	Steroids and steroid derivatives	Steroidal glycosides	C45H70O16	QNYOCAYOHKMFCQ-OLPWHGRMSA-N	CC1OC(OC2CC(OC3OC(C)C(O)C(O)C3OC4OC(C)C(O)C(O)C4O)C5(C)C6CCC7(C)C(CC8OC9(CCC(=C)CO9)C(C)C78)C6CC=C5C2)C(O)C(O)C1O	2687.62	3813.51	1621.82	3319.26	1503.02	1034.64
NEG_898	[M-H]-	(2R,3R,4R)-2,3,4,5-Tetrahydroxypentanal	0.886592	12.5083	0.400522	149.044	1.236		Organic oxygen compounds	Organooxygen compounds	Carbohydrates and carbohydrate conjugates	C5H10O5	PYMYPHUHKUWMLA-LMVFSUKVSA-N	OC[C@@H](O)[C@@H](O)[C@@H](O)C=O	792555	3661.52	7625.2	18831.3	24731.6	20701.9
NEG_15599	[M-H]-	(2R,3S,4S,5R,6R)-2-[[(2S,3R,4R)-3,4-dihydroxy-4-(hydroxymethyl)oxolan-2-yl]oxymethyl]-6-[4-(4-hydroxyphenyl)butan-2-yloxy]oxane-3,4,5-triol	0.101889	1.50565	0.344482	459.182	4.365		Lipids and lipid-like molecules	Fatty Acyls	Fatty acyl glycosides	C21H32O11	QJVVGCSWIOLQDG-PROUKMOUSA-N	CC(CCC1=CC=C(O)C=C1)OC2OC(COC3OCC(O)(CO)C3O)C(O)C(O)C2O	11285.8	5091.39	4998.32	6315.22	3608.34	4273.27
NEG_41673	[M-H]-	(2S,3R,4R,5R,6S)-2-[(2R,3S,4R,5R,6R)-4,5-dihydroxy-2-(hydroxymethyl)-6-[[7-[2-hydroxy-1-[3,4,5-trihydroxy-6-(hydroxymethyl)oxan-2-yl]oxyethyl]-1,1,4a,7-tetramethyl-3,4,4b,5,6,8,10,10a-octahydro-2H-phenanthren-2-yl]oxy]oxan-3-yl]oxy-6-methyloxane-3,4,5-triol	0.116287	2.70076	0.0982315	791.402	8.564		Lipids and lipid-like molecules	Prenol lipids	Terpene glycosides	C38H64O17	IYTSQVVPSDQONH-BINIWEQPSA-N	CC1OC(OC2C(CO)OC(OC3CCC4(C)C5CCC(C)(CC5=CCC4C3(C)C)C(CO)OC6OC(CO)C(O)C(O)C6O)C(O)C2O)C(O)C(O)C1O	8203.99	6371.77	2649.45	2290.98	1356.86	2730.07
NEG_47072	[M-H]-	(2S,3R,4R,5R,6S)-2-[(2R,3S,4S,5R,6R)-4-hydroxy-2-(hydroxymethyl)-6-[(1R,4S,5'S,6R,7S,8R,9S,13S,16S,18R)-5',7,9,13-tetramethylspiro[5-oxapentacyclo[10.8.0.02,9.04,8.013,18]icosane-6,2'-oxane]-16-yl]oxy-5-[(2S,3R,4S,5S,6R)-3,4,5-trihydroxy-6-(hydroxymethyl)oxan-2-yl]oxyoxan-3-yl]oxy-6-methyloxane-3,4,5-triol	0.100179	1.07847	0.844104	885.479	10.952		Lipids and lipid-like molecules	Steroids and steroid derivatives	Steroidal glycosides	C45H74O17	BCUDKRWNGQAFLF-GYMZVKDOSA-N	CC1CCC2(OC1)OC3CC4C5CCC6CC(CCC6(C)C5CCC4(C)C3C2C)OC7OC(CO)C(OC8OC(C)C(O)C(O)C8O)C(O)C7OC9OC(CO)C(O)C(O)C9O	3094.89	12231.3	12692.9	10001.8	7075.48	8903.11
NEG_54342	[M-H]-	(2S,3R,4S,6Ar,6bS,8aS,12aS,14bR)-2-acetyloxy-8a-[(2S,3R,4S,5S,6R)-6-[[(2R,3R,4R,5S,6R)-3,4-dihydroxy-6-(hydroxymethyl)-5-[(2S,3R,4S,5S,6R)-3,4,5-trihydroxy-6-methyloxan-2-yl]oxyoxan-2-yl]oxymethyl]-4,5-dihydroxy-3-[(2S,3R,4S,5S,6R)-3,4,5-trihydroxy-6-(hydroxymethyl)oxan-2-yl]oxyoxan-2-yl]oxycarbonyl-3-hydroxy-4,6a,6b,11,11,14b-hexamethyl-1,2,3,4a,5,6,7,8,9,10,12,12a,14,14a-tetradecahydropicene-4-…	0.0232114	2.25562	0.461184	1175.54	9.867		Lipids and lipid-like molecules	Prenol lipids	Terpene glycosides	C56H88O26	WBCUTGOPTQFPJT-WQPNWDIZSA-N	CC1OC(OC2C(O)C(O)C(OCC3OC(OC(=O)C45CCC(C)(C)CC4C6=CCC7C8(C)CC(OC(C)=O)C(O)C(C)(C8CCC7(C)C6(C)CC5)C(O)=O)C(OC9OC(CO)C(O)C(O)C9O)C(O)C3O)OC2CO)C(O)C(O)C1O	72.0823	709.366	156.24	58.2015	289.518	67.9925
NEG_53910	[M-H]-	(2S,3S,4S,5R,6R)-6-[[(3S,6Ar,6bS,8aS,14bR)-4,4,6a,6b,11,11,14b-heptamethyl-8a-[(2S,3R,4S,5S,6R)-3,4,5-trihydroxy-6-(hydroxymethyl)oxan-2-yl]oxycarbonyl-1,2,3,4a,5,6,7,8,9,10,12,12a,14,14a-tetradecahydropicen-3-yl]oxy]-4-hydroxy-3,5-bis[[(2S,3R,4S,5S,6R)-3,4,5-trihydroxy-6-(hydroxymethyl)oxan-2-yl]oxy]oxane-2-carboxylic acid	0.0590352	0.645862	0.503443	1117.52	11.142		Lipids and lipid-like molecules	Prenol lipids	Terpene glycosides	C54H86O24	LEEYYHJQGXOXHR-MYZNJVEUSA-N	CC1(C)CCC2(CCC3(C)C(=CCC4C5(C)CCC(OC6OC(C(OC7OC(CO)C(O)C(O)C7O)C(O)C6OC8OC(CO)C(O)C(O)C8O)C(O)=O)C(C)(C)C5CCC34C)C2C1)C(=O)OC9OC(CO)C(O)C(O)C9O	1781.04	5695.85	4006.26	1375.61	10463.6	5940.42
NEG_49423	[M-H]-	(2S,3S,4S,5R,6R)-6-[[(3S,6aR,6bS,8aS,14bR)-8a-carboxy-4,4,6a,6b,11,11,14b-heptamethyl-1,2,3,4a,5,6,7,8,9,10,12,12a,14,14a-tetradecahydropicen-3-yl]oxy]-3-hydroxy-5-[(2S,3R,4S,5S,6R)-3,4,5-trihydroxy-6-(hydroxymethyl)oxan-2-yl]oxy-4-[(2S,3R,4R,5R,6S)-3,4,5-trihydroxy-6-methyloxan-2-yl]oxyoxane-2-carboxylic acid	0.0327307	0.944766	0.554936	939.501	11.941		Lipids and lipid-like molecules	Prenol lipids	Terpene glycosides	C48H76O18	HRDMCVCODUFPBQ-YULPUZKJSA-N	CC1OC(OC2C(O)C(OC(OC3CCC4(C)C(CCC5(C)C4CC=C6C7CC(C)(C)CCC7(CCC56C)C(O)=O)C3(C)C)C2OC8OC(CO)C(O)C(O)C8O)C(O)=O)C(O)C(O)C1O	2869.37	2690.62	2806.16	3401.69	2907.14	2546.44
NEG_53645	[M-H]-	(2S,3S)-2-[(2S,4R,5R,6R)-4-[(4R,5S,6R)-4-[(2S,4S,5R,6R)-4,5-Dihydroxy-4,6-dimethyloxan-2-yl]oxy-5-hydroxy-6-methyloxan-2-yl]oxy-5-hydroxy-6-methyloxan-2-yl]oxy-3-[(1S,3S,4R)-3,4-dihydroxy-1-methoxy-2-oxopentyl]-6-[(2S,4R,5R,6R)-4-[(2S,4R,5S,6R)-4,5-dihydroxy-6-methyloxan-2-yl]oxy-5-methoxy-6-methyloxan-2-yl]oxy-8,9-dihydroxy-7-methyl-3,4-dihydro-2H-anthracen-1-one	0.0805932	0.927153	0.924415	1097.46	11.342		Organic oxygen compounds	Organooxygen compounds	Carbohydrates and carbohydrate conjugates	C53H78O24	GRZRQKSQIMICPO-RSCYJRMKSA-N	COC1C(C)OC(CC1OC2CC(O)C(O)C(C)O2)OC3=C(C)C(=C4C(=C5C(=O)C(OC6CC(OC7CC(OC8CC(C)(O)C(O)C(C)O8)C(O)C(C)O7)C(O)C(C)O6)C(CC5=CC4=C3)C(OC)C(=O)C(O)C(C)O)O)O	794.944	20889.1	4288.22	4833.7	9220.46	13958.8
NEG_5380	[M-H]-	(2S,3S)-3,4',5,7-Tetrahydroxyflavanone	0.480111	0.723591	0.565965	287.056	3.919		Phenylpropanoids and polyketides	Flavonoids	Flavans	C15H12O6	PADQINQHPQKXNL-CABCVRRESA-N	OC1C(OC2=C(C(=CC(=C2)O)O)C1=O)C3=CC=C(O)C=C3	4554.16	537943	224199	336463	395677	327430
NEG_16336	[M-H]-	(2S,3S)-3,5,7-Trihydroxy-2-[4-hydroxy-3-[(2S,3R,4S,5S,6R)-3,4,5-trihydroxy-6-(hydroxymethyl)oxan-2-yl]oxyphenyl]-2,3-dihydrochromen-4-one	0.486789	0.500659	0.0862026	465.104	4.253		Phenylpropanoids and polyketides	Flavonoids	Flavonoid glycosides	C21H22O12	CZOXIGOPZRIBJM-TZWBTVLISA-N	OC[C@H]1O[C@@H](OC2=C(O)C=CC(=C2)[C@@H]3OC4=CC(=CC(=C4C(=O)[C@H]3O)O)O)[C@H](O)[C@@H](O)[C@@H]1O	17241.9	171892	143395	232986	232094	199103
NEG_7932	[M-H]-	(2Z)-4,6-Dihydroxy-2-[(4-hydroxy-3,5-dimethoxyphenyl)methylidene]-1-benzofuran-3-one	0.125021	0.608485	0.315851	329.067	6.482		Phenylpropanoids and polyketides	Aurone flavonoids		C17H14O7	LOVMOOUQHWMIHZ-RZNTYIFUSA-N	COC1=CC(=CC(=C1O)OC)C=C2OC3=C(C(=CC(=C3)O)O)C2=O	4526.2	23796.1	17045.2	17119.5	37435.7	20003
NEG_47456	[M-H]-	(3beta,5xi,9xi,18xi)-22-Hydroxyolean-12-en-3-yl O--6-deoxyhexopyranosyl-(1->2)-O-pentopyranosyl-(1->2)-hexopyranosiduronic acid	0.135204	1.2896	0.705377	895.509	11.295		Lipids and lipid-like molecules	Prenol lipids	Terpene glycosides	C47H76O16	AVJNWIDNAJCPRK-AHDPYWBXSA-N	CC1OC(OC2C(O)C(O)COC2OC3C(O)C(O)C(OC3OC4CCC5(C)C(CCC6(C)C5CC=C7C8CC(C)(C)CC(O)C8(C)CCC67C)C4(C)C)C(O)=O)C(O)C(O)C1O	3963.32	27688	19451.7	25611.8	4647.56	9367.69
NEG_49420	[M-H]-	(3beta,5xi,9xi,22beta)-22-Hydroxyolean-12-en-3-yl 6-deoxy-alpha-L-mannopyranosyl-(1->2)-beta-D-galactopyranuronosyl-(1->2)-beta-D-glucopyranosiduronic acid	0.0402019	0.618633	0.480456	939.485	10.638		Lipids and lipid-like molecules	Prenol lipids	Terpene glycosides	C48H76O18	VVWSVSOPOPDXMM-VXHRKZPFSA-N	CC1OC(OC2C(O)C(O)C(OC2OC3C(O)C(O)C(OC3OC4CCC5(C)C(CCC6(C)C5CC=C7C8CC(C)(C)CC(O)C8(C)CCC67C)C4(C)C)C(O)=O)C(O)=O)C(O)C(O)C1O	1654.04	2554.25	705.366	2169.7	4895.93	877.131
NEG_9498	[M-H]-	(4-Hydroxy-2,5,5,9-tetramethylcycloundeca-2,9-dien-1-yl) 4-hydroxybenzoate	0.338475	0.246608	0.00842968	357.204	8.711		Lipids and lipid-like molecules	Prenol lipids	Sesquiterpenoids	C22H30O4	JDZBITULCWBIMC-UHFFFAOYSA-N	CC1=CCC(OC(=O)C2=CC=C(O)C=C2)C(=CC(O)C(C)(C)CCC1)C	1785.69	18834.7	14134.4	50248.7	36671.3	54010.9
NEG_19990	[M-H]-	(4As,6aS,6bR,8R,9R,10R,11R,12aR,14bS)-8,10,11-trihydroxy-9-(hydroxymethyl)-2,2,6a,6b,9,12a-hexamethyl-1,3,4,5,6,6a,7,8,8a,10,11,12,13,14b-tetradecahydropicene-4a-carboxylic acid	0.426735	0.42976	0.157507	503.339	10.414		Lipids and lipid-like molecules	Prenol lipids	Triterpenoids	C30H48O6	IDQVFXZQPGAVAM-LWWFSHPVSA-N	CC1(C)CCC2(CCC3(C)C(=CCC4C5(C)CC(O)C(O)C(C)(CO)C5C(O)CC34C)C2C1)C(O)=O	10640.9	111078	93617.1	171711	242969	86381.2
NEG_8279	[M-H]-	(5R)-5-Hydroxy-1-(4-hydroxy-3-methoxyphenyl)decan-3-one	0.535574	0.400783	0.104641	333.171	7.735		Benzenoids	Phenols	Methoxyphenols	C17H26O4	NLDDIKRKFXEWBK-CQSZACIVSA-N	CCCCCC(O)CC(=O)CCC1=CC=C(O)C(=C1)OC	7655.23	117035	103631	233476	105693	230520
NEG_10240	[M-C6H8O6-H]-	(5R)-5-Hydroxy-1-(4-hydroxy-3-methoxyphenyl)tetradecan-3-one	0.134011	1.73627	0.108056	373.255	6.918		Benzenoids	Phenols	Methoxyphenols	C21H34O4	AIULWNKTYPZYAN-GOSISDBHSA-N	CCCCCCCCCC(O)CC(=O)CCC1=CC=C(O)C(=C1)OC	8993.2	14067.5	7315.07	6736.44	5513.31	5245.13
NEG_26819	[M+FA-H]-	(5xi,6alpha,7alpha,9xi,16xi)-16-(beta-D-Glucopyranosyloxy)-6,7,17-trihydroxykauran-19-oic acid	0.551684	1.09413	0.859802	575.27	6.655		Lipids and lipid-like molecules	Prenol lipids	Terpene glycosides	C26H42O11	QUCGBWQRLWOVBR-BBJJSLPGSA-N	CC12CCCC(C)(C1C(O)C(O)C34CC(CCC23)C(CO)(C4)OC5OC(CO)C(O)C(O)C5O)C(O)=O	38823.5	387979	373353	329570	204785	196965
NEG_18958	[M+FA-H]-	(6,6-Dimethylbicyclo[3.1.1]hept-2-yl)methyl 6-O-[(2R,3R,4R)-3,4-dihydroxy-4-(hydroxymethyl)tetrahydro-2-furanyl]-beta-D-glucopyranoside	0.0770229	0.797415	0.436649	493.225	6.32		Lipids and lipid-like molecules	Prenol lipids	Terpene glycosides	C21H36O10	RSKTWDAINBIMPD-MCVCZSGFSA-N	CC1(C)C2CCC(CO[C@@H]3O[C@H](CO[C@@H]4OC[C@](O)(CO)[C@H]4O)[C@@H](O)[C@H](O)[C@H]3O)C1C2	15797.4	34658.6	16398.9	32264.5	25456.1	26118.9
NEG_20846	[M-H]-	(8S,9R,13R,14S,16R,17R)-17-[(E,2R)-2,6-Dihydroxy-6-methyl-3-oxohept-4-en-2-yl]-2,16-dihydroxy-4,4,9,13,14-pentamethyl-8,10,12,15,16,17-hexahydro-7H-cyclopenta[a]phenanthrene-3,11-dione	0.0103856	0.968071	0.9317	513.301	6.359		Lipids and lipid-like molecules	Steroids and steroid derivatives	Cucurbitacins	C30H42O7	NISPVUDLMHQFRQ-DRMFCQGMSA-N	CC(C)(O)/C=C/C(=O)[C@](C)(O)[C@H]1[C@H](O)C[C@@]2(C)[C@@H]3CC=C4C(C=C(O)C(=O)C4(C)C)[C@]3(C)C(=O)C[C@]12C	909.481	1358.34	589.645	1282.64	460.734	1208.34
NEG_6866	[M-H]-	(9Z,15Z)-12,13-Dihydroxyoctadeca-9,15-dienoate	0.652423	0.286349	0.139366	311.221	8.674		Lipids and lipid-like molecules	Fatty Acyls	Fatty acids and conjugates	C18H32O4	NMONGVDUESEHOK-UHFFFAOYSA-N	CC\C=C/CC(O)C(O)C\C=C/CCCCCCCC(O)=O	9768.75	140055	55014.3	201684	114598	399061
NEG_3703	[2M+Hac-H]-	(E)-2-(Hydroxymethyl)-3-[3-(hydroxymethyl)-6-propan-2-ylcyclohex-2-en-1-yl]prop-2-enoic acid	0.136048	0.547623	0.335424	253.033	3.59		Lipids and lipid-like molecules	Prenol lipids	Monoterpenoids	C14H22O4	SLVSUVFUFJKMCV-WUXMJOGZSA-N	CC(C)C1CCC(=CC1C=C(CO)C(O)=O)CO	367.387	24861.8	8674.8	21770.4	12174.7	27966.2
NEG_6098	[M-H]-	(R)-2-Hydroxystearic acid	0.577834	0.949071	0.932795	299.257	11.37					C18H36O3	KIHBGTRZFAVZRV-QGZVFWFLSA-N	CCCCCCCCCCCCCCCC[C@H](C(=O)O)O	5597.91	907585	402115	509816	433306	442757
NEG_818	[M-H]-	(S)-3-Amino-5-methyl-hexanoic acid	0.151456	960.838	0.374174	144.105	0.09		Organic acids and derivatives	Carboxylic acids and derivatives	Amino acids, peptides, and analogues	C7H15NO2	MLYMSIKVLAPCAK-LURJTMIESA-N	CC(C)CC(N)CC(O)=O	21930.7	4.20512	1.71801	11.2362	2.88537	8.70918
NEG_8014	[M-H]-	(Z)-5,8,11-Trihydroxyoctadec-9-enoic acid	1.3583	0.52071	0.304189	329.233	7.48		Lipids and lipid-like molecules	Fatty Acyls	Fatty acids and conjugates	C18H34O5	FITAKYVPWCVTII-QBFSEMIESA-N	CCCCCCCC(O)C=CC(O)CCC(O)CCCC(O)=O	1.5107e+06	879828	448645	2.05722e+06	551848	2.84342e+06
NEG_54375	[M-H]-	[(2R,3R,4R,6S)-6-[[(6S,7S)-6-[(2S,4R,5R,6R)-4-[(4R,5S,6R)-4-[(2S,4S,5R,6R)-5-Acetyloxy-4-hydroxy-4,6-dimethyloxan-2-yl]oxy-5-hydroxy-6-methyloxan-2-yl]oxy-5-hydroxy-6-methyloxan-2-yl]oxy-7-[(1S,3S,4R)-3,4-dihydroxy-1-methoxy-2-oxopentyl]-4,10-dihydroxy-3-methyl-5-oxo-7,8-dihydro-6H-anthracen-2-yl]oxy]-4-[(2S,4R,5S,6R)-4-hydroxy-5-methoxy-6-methyloxan-2-yl]oxy-2-methyloxan-3-yl] acetate	0.0120961	0.822997	0.690285	1181.5	10.313		Organic oxygen compounds	Organooxygen compounds	Carbohydrates and carbohydrate conjugates	C57H82O26	ZYVSOIYQKUDENJ-YVQLHGKOSA-N	COC1C(O)CC(OC1C)OC2CC(OC(C)C2OC(C)=O)OC3=C(C)C(=C4C(=C5C(=O)C(OC6CC(OC7CC(OC8CC(C)(O)C(OC(C)=O)C(C)O8)C(O)C(C)O7)C(O)C(C)O6)C(CC5=CC4=C3)C(OC)C(=O)C(O)C(C)O)O)O	157.081	561.297	269.555	380.41	605.196	214.801
NEG_54113	[M-H]-	[(2R,3R,4S,6S)-6-[(2R,3S,4R)-6-[(2R,3R,4R,6S)-6-[[(2S,3S)-3-[(1S,3S,4R)-3,4-Dihydroxy-1-methoxy-2-oxopentyl]-6-[(2S,4R,5R,6R)-4-[(2S,4R,5S,6R)-4,5-dihydroxy-6-methyloxan-2-yl]oxy-5-methoxy-6-methyloxan-2-yl]oxy-8,9-dihydroxy-7-methyl-1-oxo-3,4-dihydro-2H-anthracen-2-yl]oxy]-3-hydroxy-2-methyloxan-4-yl]oxy-3-hydroxy-2-methyloxan-4-yl]oxy-4-hydroxy-2,4-dimethyloxan-3-yl] acetate	0.0684832	0.22109	0.174201	1139.5	11.64		Organic oxygen compounds	Organooxygen compounds	Carbohydrates and carbohydrate conjugates	C55H80O25	DWKUSIQEYCEKNA-PGYZNXCJSA-N	COC1C(C)OC(CC1OC2CC(O)C(O)C(C)O2)OC3=C(C)C(=C4C(=C5C(=O)C(OC6CC(OC7CC(OC8CC(C)(O)C(OC(C)=O)C(C)O8)C(O)C(C)O7)C(O)C(C)O6)C(CC5=CC4=C3)C(OC)C(=O)C(O)C(C)O)O)O	457.403	954.218	255.108	3458.24	3889.47	190.964
NEG_25512	[M+HCOO]-	[2-Hydroxy-3-[3,4,5-trihydroxy-6-(hydroxymethyl)oxan-2-yl]oxypropyl] octadeca-9,12-dienoate	0.34798	0.479306	0.15992	561.326	10.698		Lipids and lipid-like molecules	Glycerolipids	Glycosylglycerols	C27H48O9	LBHUIJRTHBBWHP-UHFFFAOYSA-N	CCCCCC=CCC=CCCCCCCCC(=O)OCC(O)COC1OC(CO)C(O)C(O)C1O	3651.63	93047.6	71351.5	92898.2	95162.1	162552
NEG_37036	[M+HCOO]-	[2-Hydroxy-3-[3,4,5-trihydroxy-6-[[3,4,5-trihydroxy-6-(hydroxymethyl)oxan-2-yl]oxymethyl]oxan-2-yl]oxypropyl] octadeca-9,12,15-trienoate	0.595486	4.66846	0.377972	721.365	10.181		Lipids and lipid-like molecules	Glycerolipids	Glycosylglycerols	C33H56O14	MPSGDHOYFIUPSO-UHFFFAOYSA-N	CCC=CCC=CCC=CCCCCCCCC(=O)OCC(O)COC1OC(COC2OC(CO)C(O)C(O)C2O)C(O)C(O)C1O	358258	31223.5	26675.2	43770.6	17475.1	27896.5
NEG_17363	[M-H]-	[3-[2-Aminoethoxy(hydroxy)phosphoryl]oxy-2-hydroxypropyl] octadeca-9,12-dienoate	0.807058	2.27511	0.539945	476.278	10.751		Lipids and lipid-like molecules	Glycerophospholipids	Glycerophosphoethanolamines	C23H44NO7P	DBHKHNGBVGWQJE-UHFFFAOYSA-N	CCCCCC=CCC=CCCCCCCCC(=O)OCC(O)CO[P](O)(=O)OCCN	866577	81901.3	29547.5	105344	110873	213663
NEG_42012	[M-H]-	[3,4-Dihydroxy-6-[5-hydroxy-2-(4-hydroxyphenyl)-4-oxo-7-[3,4,5-trihydroxy-6-(hydroxymethyl)oxan-2-yl]oxychromen-3-yl]oxy-5-[(2S,3R,4R,5R,6S)-3,4,5-trihydroxy-6-methyloxan-2-yl]oxyoxan-2-yl]methyl acetate	0.0839618	0.471645	0.130197	797.194	6.673		Phenylpropanoids and polyketides	Flavonoids	Flavonoid glycosides	C35H42O21	HRRAIHOSJIFLNS-FXFIXYPNSA-N	CC1OC(OC2C(O)C(O)C(COC(C)=O)OC2OC3=C(OC4=CC(=CC(=C4C3=O)O)OC5OC(CO)C(O)C(O)C5O)C6=CC=C(O)C=C6)C(O)C(O)C1O	704.055	4975.07	2294.43	4401.76	7502.78	5001.3
NEG_12527	[M-H]-	[3,4,5-Trihydroxy-6-(hydroxymethyl)oxan-2-yl] 2,4-dihydroxy-6-[(E)-2-phenylethenyl]benzoate	1.11668	33.9821	0.383533	417.116	3.779		Phenylpropanoids and polyketides	Stilbenes		C21H22O9	WPPYDDRXZLFEFL-VOTSOKGWSA-N	OCC1OC(OC(=O)C2=C(C=CC3=CC=CC=C3)C=C(O)C=C2O)C(O)C(O)C1O	1.21857e+06	4218.82	1851.34	18367.5	7791.37	9878.8
NEG_28300	[M-H]-	[6-[2-(3,4-Dihydroxyphenyl)-8-hydroxy-4-oxochromen-7-yl]oxy-3,4,5-trihydroxyoxan-2-yl]methyl (E)-3-(4-hydroxyphenyl)prop-2-enoate	0.0563166	0.849926	0.565933	593.125	8.065		Phenylpropanoids and polyketides	Flavonoids	Flavonoid glycosides	C30H26O13	VXAHTPDZSOTOPQ-XCVCLJGOSA-N	OC1C(O)C(COC(=O)C=CC2=CC=C(O)C=C2)OC(OC3=CC=C4C(=O)C=C(OC4=C3O)C5=CC(=C(O)C=C5)O)C1O	26256.4	19182.5	12932.2	29218.7	23758.5	15700.7
NEG_4523	[M-H]-	1-(2,6-Dihydroxy-4-methoxyphenyl)-3-phenylpropan-1-one	3.68002	21.6245	0.380689	271.097	8.543	C09644	Phenylpropanoids and polyketides	Linear 1,3-diarylpropanoids	Chalcones and dihydrochalcones	C16H16O4	MDMCODCJMHTFIZ-UHFFFAOYSA-N	COC1=CC(=C(C(=O)CCC2=CC=CC=C2)C(=C1)O)O	1.31727e+07	138232	140373	192234	161514	268293
NEG_1909	[M-H]-	1-Carboxycyclohexaneacetic Acid	0.406449	0.0315739	0.354313	185.082	5.064		Organic acids and derivatives	Carboxylic acids and derivatives	Dicarboxylic acids and derivatives	C9H14O4	SDAXMMUAZRUWNL-UHFFFAOYSA-N	OC(=O)CC1(CCCCC1)C(O)=O	6081.79	2331.78	1842.92	9638.47	6583.82	308619
NEG_35464	[M+FA-H]-	1-O-[(2alpha,3beta,5xi,9xi,18xi)-2,3,23-Trihydroxy-28-oxoolean-12-en-28-yl]-beta-D-glucopyranose	0.996303	0.422579	0.254107	695.401	7.485		Lipids and lipid-like molecules	Prenol lipids	Terpene glycosides	C36H58O10	CJHYKSSBQRABTM-GKNYHGHUSA-N	CC1(C)CC[C@@]2(CC[C@]3(C)C(=CCC4[C@@]5(C)C[C@@H](O)[C@H](O)[C@@](C)(CO)C5CC[C@@]34C)C2C1)C(=O)O[C@@H]6O[C@H](CO)[C@@H](O)[C@H](O)[C@H]6O	11747.4	722951	259576	611365	1.31207e+06	429441
NEG_42835	[M-H]-	1-O-[(3beta,5xi,9xi,18xi)-3-(beta-D-Glucopyranuronosyloxy)-23-hydroxy-28-oxoolean-12-en-28-yl]-beta-D-glucopyranose	0.574792	11.5403	0.385423	809.424	10.692		Lipids and lipid-like molecules	Prenol lipids	Terpene glycosides	C42H66O15	RZQHWSDMLZHIRN-MCTPBCADSA-N	CC1(C)CCC2(CCC3(C)C(=CCC4C5(C)CCC(OC6OC(C(O)C(O)C6O)C(O)=O)C(C)(CO)C5CCC34C)C2C1)C(=O)OC7OC(CO)C(O)C(O)C7O	328164	8914.61	5231.9	13572.7	8153.91	7935.67
NEG_41813	[M-H]-	1-O-[(3beta,5xi,9xi,18xi)-3-(beta-D-Glucopyranuronosyloxy)-28-oxoolean-12-en-28-yl]-beta-D-glucopyranose	0.18485	2.71919	0.0114295	793.426	9.106		Lipids and lipid-like molecules	Prenol lipids	Terpene glycosides	C42H66O14	YOSRLTNUOCHBEA-SNRHWUJASA-N	CC1(C)CCC2(CCC3(C)C(=CCC4C5(C)CCC(OC6OC(C(O)C(O)C6O)C(O)=O)C(C)(C)C5CCC34C)C2C1)C(=O)OC7OC(CO)C(O)C(O)C7O	10184.8	10311.5	12972	1820.2	6350.12	4137.91
NEG_40765	[M-H]-	1-O-[4-O-(p-Hydroxycinnamoyl)-beta-D-fructofuranosyl]-2-O,6-O-bis(p-hydroxycinnamoyl)-alpha-D-glucopyranose	1.813	38.2067	0.371555	779.221	5.892		Phenylpropanoids and polyketides	Cinnamic acids and derivatives	Hydroxycinnamic acids and derivatives	C39H40O17	SMVZSPTUXANNGQ-OHRRTPEXSA-N	OCC1OC(CO)(OC2OC(COC(=O)C=CC3=CC=C(O)C=C3)C(O)C(O)C2OC(=O)C=CC4=CC=C(O)C=C4)C(O)C1OC(=O)C=CC5=CC=C(O)C=C5	3.14121e+06	34597	32744.4	32349.5	26205.8	25423.6
NEG_10771	[M-H]-	1-O-Sinapoyl-beta-D-glucose	0.257447	9.73932	0.395548	385.113	3.685		Phenylpropanoids and polyketides	Cinnamic acids and derivatives	Hydroxycinnamic acids and derivatives	C17H22O10	XRKBRPFTFKKHEF-DGDBGZAXSA-N	COC1=C(O)C(=CC(=C1)C=CC(=O)OC2OC(CO)C(O)C(O)C2O)OC	66920.9	1577.44	1031.88	2646.62	2080.57	2411.93
NEG_23583	[M+HCOO]-	1-Palmitoylphosphatidylcholine	0.551234	1.17392	0.432415	540.327	11.205		Lipids and lipid-like molecules	Glycerophospholipids	Glycerophosphocholines	C24H50NO7P	ASWBNKHCZGQVJV-UHFFFAOYSA-N	CCCCCCCCCCCCCCCC(=O)OCC(O)CO[P]([O-])(=O)OCC[N+](C)(C)C	305400	236861	214861	148966	243875	252111
NEG_8292	[M-H]-	1,10a-Dihydroxy-4,4,7,11b-tetramethyl-2,3,4,4a,5,6,6a,7,10a,11,11a,11b-dodecahydrophenanthro[3,2-b]furan-9(1H)-one	0.100678	0.501423	0.194809	333.209	8.567		Organoheterocyclic compounds	Naphthofurans		C20H30O4	PUFYSEQCTZERQM-UHFFFAOYSA-N	CC1C2CCC3C(C)(C)CCC(O)C3(C)C2CC4(O)OC(=O)C=C14	2865.41	8242.98	4730.95	14755.1	12067.4	4766.37
NEG_31616	[M-H]-	1,2,3-Tri-O-galloyl-beta-D-glucose	0.0520796	0.864729	0.659897	635.088	3.751		Phenylpropanoids and polyketides	Tannins		C27H24O18	MACFXELYCBWKGT-VFTFQOQOSA-N	OCC1OC(OC(=O)C2=CC(=C(O)C(=C2)O)O)C(OC(=O)C3=CC(=C(O)C(=C3)O)O)C(OC(=O)C4=CC(=C(O)C(=C4)O)O)C1O	16241.5	34694	13394.9	29278.8	23640.6	21474.4
NEG_41335	[M-H]-	1,2,3,6-Tetrakis-O-galloyl-beta-D-glucose	0.251695	0.968162	0.966988	787.097	3.83		Phenylpropanoids and polyketides	Tannins		C34H28O22	RATQVALKDAUZBW-XPMKZLBQSA-N	OC1C(COC(=O)C2=CC(=C(O)C(=C2)O)O)OC(OC(=O)C3=CC(=C(O)C(=C3)O)O)C(OC(=O)C4=CC(=C(O)C(=C4)O)O)C1OC(=O)C5=CC(=C(O)C(=C5)O)O	1131.07	282794	70524.9	168462	84489.5	113154
NEG_8412	[M-H]-	1,3,4-Trihydroxy-5-[[3-(4-hydroxyphenyl)-1-oxo-2-propenyl]oxy]-,(1r,3r,4s,5r)-cyclohexanecarboxylic acid	0.0115836	0.59463	0.605339	337.091	3.295		Organic oxygen compounds	Organooxygen compounds	Alcohols and polyols	C16H18O8	BMRSEYFENKXDIS-UHFFFAOYSA-N	OC1CC(O)(CC(OC(=O)C=CC2=CC=C(O)C=C2)C1O)C(O)=O	218.09	177.653	131.727	175.086	709.042	2.92762
NEG_31615	[M-H]-	1,3,6-Tri-O-galloyl-beta-D-glucose	0.114132	1.47611	0.509555	635.087	3.889		Phenylpropanoids and polyketides	Tannins		C27H24O18	RNKMOGIPOMVCHO-SJMVAQJGSA-N	OC1C(COC(=O)C2=CC(=C(O)C(=C2)O)O)OC(OC(=O)C3=CC(=C(O)C(=C3)O)O)C(O)C1OC(=O)C4=CC(=C(O)C(=C4)O)O	24870.7	16036.6	2951.95	12588.6	7848.83	9275.18
NEG_1098	[M]-	1,4-Naphthoquinone	0.0527177	2.00819	0.578197	158.036	5.508		Benzenoids	Naphthalenes	Naphthoquinones	C10H6O2	FRASJONUBLZVQX-UHFFFAOYSA-N	O=C1C=CC(=O)C2=CC=CC=C12	44.9141	636.028	2579.11	1495.06	128.321	0
NEG_21025	[M-H]-	1,5-Dicaffeoyl quinic acid	0.0839185	0.489793	0.182773	515.32	7.028					C25H24O12	YDDUMTOHNYZQPO-ZSGFIFMUSA-N	C1[C@@H]([C@@H]([C@H](C[C@]1(C(=O)O)OC(=O)/C=C/C2=CC(=C(C=C2)O)O)OC(=O)/C=C/C3=CC(=C(C=C3)O)O)O)O	1659.12	4114.51	2639.17	8695.68	2922.59	5557.93
NEG_7796	[M-H]-	10-(4-Sulfophenyl)decanoic acid	0.104932	0.625042	0.142771	327.121	6.004		Benzenoids	Benzene and substituted derivatives	Benzenesulfonic acids and derivatives	C16H24O5S	VCKAUONIDRWIGP-UHFFFAOYSA-N	OC(=O)CCCCCCCCCC1=CC=C(C=C1)[S](O)(=O)=O	14981.7	8020.91	7102.43	13339.5	14462.2	20363.1
NEG_5923	[M-H]-	12-Hydroxyoctadec-9-enoic acid	0.133306	0.87413	0.745636	297.239	10.216		Lipids and lipid-like molecules	Fatty Acyls	Fatty acids and conjugates	C18H34O3	WBHHMMIMDMUBKC-UHFFFAOYSA-N	CCCCCCC(O)CC=CCCCCCCCC(O)=O	130181	208180	75989.3	99536.9	133956	240521
NEG_7357	[M-H]-	12S-Hepe	0.0200104	0.95873	0.958287	317.214	10.001		Lipids and lipid-like molecules	Fatty Acyls	Eicosanoids	C20H30O3	MCRJLMXYVFDXLS-UOLHMMFFSA-N	CC\\C=C/C/C=C\\C[C@H](O)\\C=C\\C=C/C/C=C\\CCCC(O)=O	1268.18	370.438	652.459	212.128	1850.27	327.303
NEG_5686	[M-H]-	14-(3-Ethyloxiran-2-YL)tetradeca-9,12-dienoic acid	0.907028	6.17028	0.407803	293.213	9.905		Lipids and lipid-like molecules	Fatty Acyls	Fatty acids and conjugates	C18H30O3	HKSDVVJONLXYKL-UHFFFAOYSA-N	CCC1OC1CC=CCC=CCCCCCCCC(O)=O	856112	37081.4	20632.8	44105.2	24868.8	79127.2
NEG_9491	[M-H]-	15,16-Dimethoxytricyclo[12.3.1.1~2,6~]nonadeca-1(18),2(19),3,5,14,16-hexaene-3,9,17-triol	0.455612	0.2355	0.00298091	357.169	6.014		Phenylpropanoids and polyketides	Diarylheptanoids	Cyclic diarylheptanoids	C21H26O5	UTKZLHKWTSXNQI-UHFFFAOYSA-N	COC1=C(O)C2=CC(=C1OC)CCCCC(O)CCC3=CC=C(O)C2=C3	6822.62	20821.5	35492.7	82667.4	82824.1	102606
NEG_31564	[M-H]-	16-Hydroxy-3-(beta-D-xylopyranosyloxy)-, (3beta,5xi,9xi,16alpha)-olean-12-ene-23,28-dioic acid	1.67708	5.41742	0.389294	633.378	9.452		Lipids and lipid-like molecules	Prenol lipids	Triterpenoids	C35H54O10	CFAJIMXUZRPYDP-GHCUZIKHSA-N	CC1(C)CCC2(C(O)CC3(C)C(=CCC4C5(C)CCC(OC6OCC(O)C(O)C6O)C(C)(C5CCC34C)C(O)=O)C2C1)C(O)=O	2.86532e+06	236799	95905.3	143073	224450	222800
NEG_9283	[M-H]-	19S-Methoxytubotaiwine	0.147869	0.855921	0.785488	353.2	9.95					C21H26N2O3	LTOOPESWVADEAE-UHFFFAOYNA-N	O=C(OC)C1=C2NC=3C=CC=CC3C24CCN5CCC1C(C(OC)C)C54	531.118	57731.9	29709.1	41979.1	29958.8	30842.8
NEG_28475	[M-H]-	2-(3,4-Dihydroxyphenyl)-5,7-dihydroxy-3-[(2S,3R,4S,5S,6R)-3,4,5-trihydroxy-6-[[(2S,3R,4S,5R)-3,4,5-trihydroxyoxan-2-yl]oxymethyl]oxan-2-yl]oxychromen-4-one	0.362859	0.479601	0.179786	595.146	6.28		Phenylpropanoids and polyketides	Flavonoids	Flavonoid glycosides	C26H28O16	YNMFDPCLPIMRFD-PEXUZNNCSA-N	OC1COC(OCC2OC(OC3=C(OC4=C(C(=CC(=C4)O)O)C3=O)C5=CC(=C(O)C=C5)O)C(O)C(O)C2O)C(O)C1O	8552.09	103440	60453.4	158729	132606	68223.9
NEG_6818	[2M+Hac-H]-	2-(3,4-Dimethoxyphenyl)-7-hydroxy-4H-chromen-4-one	0.178221	4.96729	0.349383	311.089	8.489		Phenylpropanoids and polyketides	Flavonoids	O-methylated flavonoids	C17H14O5	MEDOAKSPIIOKFU-UHFFFAOYSA-N	COC1=C(OC)C=C(C=C1)C2=CC(=O)C3=CC=C(O)C=C3O2	29985.6	2574.35	3325.27	3164.54	1881.71	2178.06
NEG_3604	[M-H]-	2-[(1S,2S,4aR,8aS)-1-Hydroxy-4a-methyl-8-methylenedecahydro-2-naphthalenyl]acrylic acid	0.248668	0.580225	0.167112	249.149	8.119		Lipids and lipid-like molecules	Prenol lipids	Sesquiterpenoids	C15H22O3	QTSQCCVLTMKKDP-SFDCQRBFSA-N	CC12CCCC(=C)C1C(O)C(CC2)C(=C)C(O)=O	88399.9	55205.9	64396.8	116542	169509	72435.8
NEG_48394	[M-H]-	2-[[6-[[17-[5,6-Dimethyl-3-[3,4,5-trihydroxy-6-(hydroxymethyl)oxan-2-yl]oxyhept-5-en-2-yl]-1-hydroxy-10,13-dimethyl-2,3,4,7,8,9,11,12,14,15,16,17-dodecahydro-1H-cyclopenta[a]phenanthren-3-yl]oxy]-3,4,5-trihydroxyoxan-2-yl]methoxy]-6-(hydroxymethyl)oxane-3,4,5-triol	0.121843	1.04124	0.937005	915.506	11.625		Lipids and lipid-like molecules	Steroids and steroid derivatives	Steroidal glycosides	C46H76O18	HBCGNAJUSBIBGA-UHFFFAOYSA-N	CC(C(CC(C)=C(C)C)OC1OC(CO)C(O)C(O)C1O)C2CCC3C4CC=C5CC(CC(O)C5(C)C4CCC23C)OC6OC(COC7OC(CO)C(O)C(O)C7O)C(O)C(O)C6O	1465.2	23392.7	18585.6	15051.4	15719.4	10951.9
NEG_4407	[M-C6H8O6-H]-	2-[2-(4-Methoxyphenyl)-2-oxoethyl]benzoic acid	0.278704	1.02431	0.965606	269.177	5.944		Phenylpropanoids and polyketides	Stilbenes		C16H14O4	DPXWHZUTDZONDB-UHFFFAOYSA-N	COC1=CC=C(C=C1)C(=O)CC2=C(C=CC=C2)C(O)=O	1780.23	114495	96144.2	79754.4	46974.7	80648.2
NEG_23481	[M-H]-	2-[3-[4-[1,3-Dihydroxy-1-(4-hydroxy-3-methoxyphenyl)propan-2-yl]oxy-3-methoxyphenyl]propoxy]-6-(hydroxymethyl)oxane-3,4,5-triol	0.451976	0.472867	0.0279858	539.21	4.272		Lignans, neolignans and related compounds	Lignan glycosides		C26H36O12	NFUHNVZGHNEYRG-UHFFFAOYSA-N	COC1=C(O)C=CC(=C1)C(O)C(CO)OC2=C(OC)C=C(CCCOC3OC(CO)C(O)C(O)C3O)C=C2	37509.1	99550.1	76069.6	157344	121477	171895
NEG_23246	[M-H]-	2-[4-[4-[Hydroxy-(4-hydroxy-3-methoxyphenyl)methyl]-3-(hydroxymethyl)oxolan-2-yl]-2-methoxyphenoxy]-6-(hydroxymethyl)oxane-3,4,5-triol	0.152751	0.621419	0.259985	537.194	4.119		Lignans, neolignans and related compounds	Lignan glycosides		C26H34O12	AWTYKUNFPBFFHC-UHFFFAOYSA-N	COC1=CC(=CC=C1O)C(O)C2COC(C2CO)C3=CC=C(OC4OC(CO)C(O)C(O)C4O)C(=C3)OC	5357.66	36071.9	18420.7	37034	31027.7	28250.6
NEG_7737	[M-H]-	2-Amido-3,5,6-trichloro-4-cyanobenzenesulfonic acid	0.0390616	0.160571	0.392962	326.884	3.546		Benzenoids	Benzene and substituted derivatives	Benzenesulfonic acids and derivatives	C8H3Cl3N2O4S	JNMMKKYUIIQPDG-UHFFFAOYSA-N	NC(=O)C1=C(C(=C(Cl)C(=C1Cl)C#N)Cl)[S](O)(=O)=O	0	63.9235	250.671	1787.85	34.5254	136.851
NEG_17573	[M-H]-	2-Azaniumylethyl (2-hydroxy-3-octadec-9-enoyloxypropyl) phosphate	0.442982	2.90975	0.407937	478.292	11.146		Lipids and lipid-like molecules	Glycerophospholipids	Glycerophosphoethanolamines	C23H46NO7P	PYVRVRFVLRNJLY-UHFFFAOYSA-N	CCCCCCCCC=CCCCCCCCC(=O)OCC(O)CO[P](O)(=O)OCCN	219687	47658.5	7986.91	22297.3	30634.6	41692.2
NEG_9338	[M-H]-	2-beta-D-Glucopyranosyloxy-4-methoxy-cis-cinnamic acid	0.503246	1.51817	0.657756	355.103	3.024		Organic oxygen compounds	Organooxygen compounds	Carbohydrates and carbohydrate conjugates	C16H20O9	FQWZGEBZILOCET-QEQKPWIDSA-N	COC1=CC=C(C=CC(O)=O)C(=C1)OC2OC(CO)C(O)C(O)C2O	420504	56040.4	53214.6	173567	61957.8	113420
NEG_6754	[M-H]-	2-Dodecoxyethyl hydrogen sulfate	0.171489	0.65719	0.286442	309.168	8.012		Organic acids and derivatives	Organic sulfuric acids and derivatives	Sulfuric acid esters	C14H30O5S	QTDIEDOANJISNP-UHFFFAOYSA-N	CCCCCCCCCCCCOCCO[S](O)(=O)=O	6934.85	46301.3	34020.6	51399.1	37043.2	44330.2
NEG_257	[M-H]-	2-Furoic acid	2.32897	0.504719	0.237414	111.009	1.144	C01546	Organoheterocyclic compounds	Furans	Furoic acid and derivatives	C5H4O3	SMNDYUVBFMFKNZ-UHFFFAOYSA-N	OC(=O)C1=CC=CO1	64.8616	2.74094e+06	9.58836e+06	7.12184e+06	8.26296e+06	9.04338e+06
NEG_2198	[M-H]-	2-Hydroxy-3,4-dimethoxybenzoic acid	0.116621	1.24304	0.803398	197.043	3.499		Benzenoids	Benzene and substituted derivatives	Benzoic acids and derivatives	C9H10O5	CJFQIVAOBBTJCI-UHFFFAOYSA-N	COC1=CC=C(C(O)=O)C(=C1OC)O	25889.2	5391.75	1410.05	3983.28	9486.28	12829.6
NEG_8672	[M-H]-	2-Hydroxy-6-[(8Z,11Z)-pentadeca-8,11,14-trienyl]benzoic acid	0.236334	0.648206	0.469842	341.211	11.288		Benzenoids	Benzene and substituted derivatives	Benzoic acids and derivatives	C22H30O3	QUVGEKPNSCFQIR-UTOQUPLUSA-N	OC(=O)C1=C(CCCCCCCC=CCC=CCC=C)C=CC=C1O	106.042	75368.9	100922	71799.5	57871.6	142459
NEG_2871	[M-H]-	2-Hydroxychalcone	0.425471	0.39559	0.0635825	223.132	6.979		Phenylpropanoids and polyketides	Linear 1,3-diarylpropanoids	Chalcones and dihydrochalcones	C15H12O2	UDOOPSJCRMKSGL-ZHACJKMWSA-N	OC1=C(C=CC=C1)C=CC(=O)C2=CC=CC=C2	2952.25	77191.1	60295.8	149682	113473	91857.6
NEG_9393	[M-H]-	2-Hydroxydocosanoic acid	0.446112	1.27173	0.828439	355.317	11.715		Lipids and lipid-like molecules	Fatty Acyls	Fatty acids and conjugates	C22H44O3	RPGJJWLCCOPDAZ-UHFFFAOYSA-N	O=C(O)C(O)CCCCCCCCCCCCCCCCCCCC	260141	2961.43	321201	1207.07	2659.02	455589
NEG_932	[M-H]-	2-Hydroxyphenylacetic acid	0.117195	0.530934	0.496116	151.042	4.133	C05852	Benzenoids	Benzene and substituted derivatives	Phenylacetic acids	C8H8O3	CCVYRRGZDBSHFU-UHFFFAOYSA-N	OC(=O)CC1=C(O)C=CC=C1	7105.4	27345.4	4847.51	10588.4	11314.6	52114.3
NEG_2397	[M-H]-	2-Naphthalenesulfonic acid	0.11275	0.835855	0.868522	207.011	4.293		Benzenoids	Naphthalenes	Naphthalene sulfonic acids and derivatives	C10H8O3S	KVBGVZZKJNLNJU-UHFFFAOYSA-N	O[S](=O)(=O)C1=CC2=C(C=CC=C2)C=C1	304.922	10785.2	14396.4	27073.4	1254.27	2163.97
NEG_11653	[M+FA-H]-	2-O-Glucosyloxy-4-methoxycinnamic acid	0.483101	0.409599	0.0633411	401.109	2.841		Organic oxygen compounds	Organooxygen compounds	Carbohydrates and carbohydrate conjugates	C16H20O9	FQWZGEBZILOCET-BJGSYIFTSA-N	COC1=CC(=C(\\C=C\\C(O)=O)C=C1)O[C@@H]2O[C@H](CO)[C@@H](O)[C@H](O)[C@H]2O	19065.9	100396	59034.3	187077	103627	145080
NEG_25693	[M-H]-	2-Oahsa	0.0919009	0.598996	0.665397	563.504	11.795		Lipids and lipid-like molecules	Fatty Acyls	Fatty acids and conjugates	C36H68O4	XHLKZBFZGPVOIC-ZPHPHTNESA-N	CCCCCCCCCCCCCCCCC(OC(=O)CCCCCCCC=CCCCCCCCC)C(O)=O	18608.9	275.312	430.108	84.1884	8325.38	23835
NEG_23361	[M-H]-	2-Palmitoyloxystearic acid	0.185475	0.372632	0.131181	537.482	11.705		Lipids and lipid-like molecules	Fatty Acyls	Fatty acids and conjugates	C34H66O4	JFVDDJAUQXHRIZ-UHFFFAOYSA-N	CCCCCCCCCCCCCCCCC(OC(=O)CCCCCCCCCCCCCCC)C(O)=O	0	16067.6	10550.2	19531.2	15641.3	36259.3
NEG_4603	[M-H]-	2-Phenyl-3H-benzimidazol-1-ium-5-sulfonate	0.286946	1.57876	0.76381	273.037	4.275		Organoheterocyclic compounds	Benzimidazoles	Phenylbenzimidazoles	C13H10N2O3S	UVCJGUGAGLDPAA-UHFFFAOYSA-N	O[S](=O)(=O)C1=CC2=C(C=C1)N=C([NH]2)C3=CC=CC=C3	146521	2075.87	944.743	1487.95	1972.78	91260
NEG_975	[M-H]-	2,3-Dihydroxybenzoic acid	0.239653	0.794732	0.674705	153.019	2.087	C00196	Benzenoids	Benzene and substituted derivatives	Benzoic acids and derivatives	C7H6O4	GLDQAMYCGOIJDV-UHFFFAOYSA-N	OC(=O)C1=C(O)C(=CC=C1)O	37796.5	221048	88852.4	101027	116183	220292
NEG_2117	[M-H]-	2,3,5-Trichlorophenol	0.493794	2.67845	0.503501	194.916	7.777	C11447	Benzenoids	Phenols	Halophenols	C6H3Cl3O	WWGQHTJIFOQAOC-UHFFFAOYSA-N	OC1=C(Cl)C(=CC(=C1)Cl)Cl	53.2714	40481.3	207574	92430.8	200.586	0
NEG_4079	[M-H]-	2,3,6-Trichloro-5-cyano-4-hydroxybenzamide	0.00568631	1.75337	0.610781	262.913	6.349		Benzenoids	Benzene and substituted derivatives	Benzoic acids and derivatives	C8H3Cl3N2O2	WUYYRWIYXBUPBS-UHFFFAOYSA-N	NC(=O)C1=C(Cl)C(=C(O)C(=C1Cl)Cl)C#N	0	41.7914	27.4501	39.4905	0	0
NEG_2721	[M-H]-	2,4-Dichlorophenoxyacetic acid	0.23009	0.762755	0.83531	218.962	5.718	C03664	Benzenoids	Benzene and substituted derivatives	Phenoxyacetic acid derivatives	C8H6Cl2O3	OVSKIKFHRZPJSS-UHFFFAOYSA-N	OC(=O)COC1=CC=C(Cl)C=C1Cl	52.5079	61283.3	47657.1	142509	93.0359	291.505
NEG_3038	[M-H]-	2,4,6-Trihydroxybenzophenone	0.435289	1.30024	0.763441	229.051	5.47	C06356	Benzenoids	Benzene and substituted derivatives	Benzophenones	C13H10O4	CPEXFJVZFNYXGU-UHFFFAOYSA-N	OC1=CC(=C(C(=C1)O)C(=O)C2=CC=CC=C2)O	3217.47	424477	108924	100661	171711	140334
NEG_977	[M-H]-	2,5-Dihydroxybenzoic acid	0.299566	0.659422	0.771014	153.019	1.448	C00628	Benzenoids	Benzene and substituted derivatives	Benzoic acids and derivatives	C7H6O4	WXTMDXOMEHJXQO-UHFFFAOYSA-N	OC(=O)C1=CC(=CC=C1O)O	2666.11	34078.5	394494	1669.56	622740	29554.9
NEG_18787	[M-H]-	2'-Deoxyinosine triphosphate	1.0018	0.685981	0.526661	491.31	11.776		Nucleosides, nucleotides, and analogues	Purine nucleotides	Purine deoxyribonucleotides	C10H15N4O13P3	UFJPAQSLHAGEBL-RRKCRQDMSA-N	OC1CC(OC1CO[P](O)(=O)O[P](O)(=O)O[P](O)(O)=O)[N]2C=NC3=C2NC=NC3=O	107355	2.19014e+06	889700	903187	1.62716e+06	2.11582e+06
NEG_5823	[M-H]-	2'-Methoxyformonetin	0.116563	0.344232	0.159229	297.072	8.979		Phenylpropanoids and polyketides	Isoflavonoids	O-methylated isoflavonoids	C17H14O5	SSRCYGATNWFTBJ-UHFFFAOYSA-N	COC1=CC(=C(C=C1)C2=COC3=CC(=CC=C3C2=O)O)OC	677.677	5683.35	3132.4	3416.92	14375.5	9786.17
NEG_30160	[M-H]-	2'-O-Galloylhyperin	0.404915	0.497097	0.127025	615.1	4.798		Phenylpropanoids and polyketides	Flavonoids	Flavonoid glycosides	C28H24O16	PXGWEUQZDRUMRE-UNZYZCBSSA-N	OCC1OC(OC2=C(OC3=C(C(=CC(=C3)O)O)C2=O)C4=CC(=C(O)C=C4)O)C(OC(=O)C5=CC(=C(O)C(=C5)O)O)C(O)C1O	0	128213	94546.8	158150	155379	134593
NEG_3904	[M-H]-	2',4',6'-Trihydroxydihydrochalcone	0.539042	4.3747	0.204743	257.08	7.491		Phenylpropanoids and polyketides	Linear 1,3-diarylpropanoids	Chalcones and dihydrochalcones	C15H14O4	QWQGMMRHTWIOGH-UHFFFAOYSA-N	OC1=CC(=C(C(=C1)O)C(=O)CCC2=CC=CC=C2)O	190394	21626.4	80016.9	29623.7	18531.2	18601.2
NEG_6901	[M-H]-	2',7-Dihydroxy-4',5'-dimethoxyisoflavone	0.196907	0.741616	0.592274	312.998	5.588		Phenylpropanoids and polyketides	Isoflavonoids	O-methylated isoflavonoids	C17H14O6	UYOJEKMKWXYOEQ-UHFFFAOYSA-N	COC1=CC(=C(C=C1OC)C2=COC3=CC(=CC=C3C2=O)O)O	108.871	85131.6	50894.3	64248.1	40093.8	79223.3
NEG_41819	[M-H]-	28-Dioic acid, 3-[(6-deoxy-4-O-beta-D-glucopyranosyl-alpha-L-mannopyranosyl)oxy]-, (3beta,5xi,9xi,18xi)-urs-12-ene-27	0.251959	0.89767	0.836215	793.448	11.276		Lipids and lipid-like molecules	Prenol lipids	Terpene glycosides	C42H66O14	IIIOQVDDEWZCEQ-YKQGQIHISA-N	CC1CCC2(CCC3(C(O)=O)C(=CCC4C5(C)CCC(OC6OC(C)C(OC7OC(CO)C(O)C(O)C7O)C(O)C6O)C(C)(C)C5CCC34C)C2C1C)C(O)=O	20934.1	178660	84564.6	97399.3	138593	80560.1
NEG_2086	[M-H]-	3-(4-Hydroxy-3-methoxyphenyl)-2-propenoic acid	0.367012	0.662792	0.329382	193.048	3.985		Phenylpropanoids and polyketides	Cinnamic acids and derivatives	Hydroxycinnamic acids and derivatives	C10H10O4	KSEBMYQBYZTDHS-UHFFFAOYSA-N	COC1=C(O)C=CC(=C1)C=CC(O)=O	38191.8	159318	176301	256788	129707	177499
NEG_1191	[M-H]-	3-(4-Hydroxyphenyl)-2-propenoic acid	0.048494	0.56968	0.0267855	163.039	4.544		Phenylpropanoids and polyketides	Cinnamic acids and derivatives	Hydroxycinnamic acids and derivatives	C9H8O3	NGSWKAQJJWESNS-UHFFFAOYSA-N	OC(=O)C=CC1=CC=C(O)C=C1	1472.81	1727.11	2529.7	3217.77	2955.19	3884.64
NEG_25371	[M+FA-H]-	3-(Hexopyranosyloxy)-2-hydroxypropyl ester, (9Z,12Z,15Z)-9,12,15-octadecatrienoic acid	0.434924	2.91116	0.413927	559.314	10.459		Lipids and lipid-like molecules	Glycerolipids	Glycosylglycerols	C27H46O9	HUSISCNTLUEZCN-PDBXOOCHSA-N	CC\\C=C/C/C=C\\C\\C=C/CCCCCCCC(=O)OCC(O)COC1OC(CO)C(O)C(O)C1O	207987	24111.3	24243.7	41404.8	20308.7	26341.2
NEG_31920	[M-H]-	3-[(2S,3R,4S,5R,6R)-3-[(2S,3S,4R,5R,6S)-3,5-Dihydroxy-4-methoxy-6-methyloxan-2-yl]oxy-4,5-dihydroxy-6-methyloxan-2-yl]oxy-8-hydroxy-15-methyl-11,18-dioxapentacyclo[10.6.2.02,7.09,19.016,20]icosa-1(19),2(7),3,5,8,12(20),13,15-octaene-10,17-dione	0.115979	0.628207	0.372154	639.171	6.235		Organoheterocyclic compounds	Naphthopyrans	Naphthopyranones	C32H32O14	PONPPNYZKHNPKZ-BAHCCNBTSA-N	COC1C(O)C(C)OC(OC2C(O)C(O)C(C)OC2OC3=CC=CC4=C3C5=C6C(=C4O)C(=O)OC7=CC=C(C)C(=C67)C(=O)O5)C1O	1468.32	21584.1	14611	14494.2	28840.2	16619.5
NEG_48365	[M-H]-	3-[(2S,3R,4S,5S,6R)-4,5-Dihydroxy-3-[(2S,3R,4R,5R,6S)-3,4,5-trihydroxy-6-methyloxan-2-yl]oxy-6-[[(2S,3R,4R,5R,6S)-3,4,5-trihydroxy-6-methyloxan-2-yl]oxymethyl]oxan-2-yl]oxy-5-hydroxy-2-(4-hydroxyphenyl)-6-methoxy-7-[(2S,3R,4R,5R,6S)-3,4,5-trihydroxy-6-methyloxan-2-yl]oxychromen-4-one	0.0182796	0.598615	0.365154	915.287	7.91		Phenylpropanoids and polyketides	Flavonoids	Flavonoid glycosides	C40H52O24	TXZUPPVCNIMVHW-AJMZACEDSA-N	COC1=C(O)C2=C(OC(=C(OC3OC(COC4OC(C)C(O)C(O)C4O)C(O)C(O)C3OC5OC(C)C(O)C(O)C5O)C2=O)C6=CC=C(O)C=C6)C=C1OC7OC(C)C(O)C(O)C7O	107.312	587.521	107.905	591.033	355.391	394.566
NEG_8751	[M-H]-	3-[2-Hydroxy-3-[(2S,3R,4S,5S,6R)-3,4,5-trihydroxy-6-(hydroxymethyl)oxan-2-yl]oxyphenyl]propanoic acid	0.358784	0.314353	0.0510031	343.103	3.122		Organic oxygen compounds	Organooxygen compounds	Carbohydrates and carbohydrate conjugates	C15H20O9	JDNUVLAJLPVYNP-SWMGHYKJSA-N	OC[C@H]1O[C@@H](OC2=CC=CC(=C2O)CCC(O)=O)[C@H](O)[C@@H](O)[C@@H]1O	7589.22	37587.9	13062.8	73068.4	37221.6	74979.4
NEG_26858	[M-H]-	3-[5-(3,5-Dihydroxydecanoyloxy)-3-hydroxydecanoyl]oxy-5-hydroxydecanoic acid	0.0936395	0.248826	0.123683	575.383	9.964		Lipids and lipid-like molecules	Fatty Acyls	Fatty acid esters	C30H56O10	XBEDTLDOFCRJHC-UHFFFAOYSA-N	CCCCCC(O)CC(O)CC(=O)OC(CCCCC)CC(O)CC(=O)OC(CC(O)CCCCC)CC(O)=O	1259.18	1735.69	619.438	1319.95	5667.28	7538.19
NEG_11980	[M-H]-	3-Dehydrocholic acid	0.0588104	0.741008	0.428082	405.26	8.704		Lipids and lipid-like molecules	Steroids and steroid derivatives	Bile acids, alcohols and derivatives	C24H38O5	OEKUSRBIIZNLHZ-YXRVOZSUSA-N	C[C@H](CCC(O)=O)[C@@H]1CC[C@H]2[C@@H]3[C@H](O)C[C@@H]4CC(=O)CC[C@]4(C)[C@H]3C[C@H](O)[C@]12C	8386.01	14705.2	3296.56	13765.4	9839.44	12005.7
NEG_6069	[M-H]-	3-Hydroxy-3',4'-dimethoxyflavone	0.589094	0.325117	0.082112	299.13	7.78		Phenylpropanoids and polyketides	Flavonoids	Flavones	C17H14O5	BXLAVJWSFYZDPF-UHFFFAOYSA-N	COC1=C(OC)C=C(C=C1)C2=C(O)C(=O)C3=CC=CC=C3O2	94284.4	60319.1	57358.2	103352	230252	318352
NEG_47369	[M-H]-	3-Hydroxy-6-[(9-hydroxy-4,4,6a,6b,8a,11,11,14b-octamethyl-1,2,3,4a,5,6,7,8,9,10,12,14a-dodecahydropicen-3-yl)oxy]-4-(3,4,5-trihydroxy-6-methyloxan-2-yl)oxy-5-(3,4,5-trihydroxyoxan-2-yl)oxyoxane-2-carboxylic acid	0.0876673	1.33232	0.571398	893.482	11.027		Lipids and lipid-like molecules	Prenol lipids	Terpene glycosides	C47H74O16	LXAMCLNOVGHDMD-UHFFFAOYSA-N	CC1OC(OC2C(O)C(OC(OC3CCC4(C)C(CCC5(C)C4C=CC6=C7CC(C)(C)CC(O)C7(C)CCC56C)C3(C)C)C2OC8OCC(O)C(O)C8O)C(O)=O)C(O)C(O)C1O	6146.03	8837.14	4877.73	2756.65	9792.7	2357.7
NEG_5828	[M-H]-	3-Hydroxy-7-methoxy-2-(4-methoxyphenyl)-4H-chromen-4-one	0.340446	0.424014	0.0606431	297.075	10.299		Phenylpropanoids and polyketides	Flavonoids	Flavones	C17H14O5	IFHXSMSQHPVVSF-UHFFFAOYSA-N	COC1=CC=C(C=C1)C2=C(O)C(=O)C3=C(O2)C=C(OC)C=C3	587.885	57384.4	59685.1	84179.4	106464	86841.2
NEG_960	[M-H]-	3-Hydroxyanthranilic acid	0.152439	0.658796	0.184339	152.036	4.153	C00632	Benzenoids	Benzene and substituted derivatives	Benzoic acids and derivatives	C7H7NO3	WJXSWCUQABXPFS-UHFFFAOYSA-N	NC1=C(C=CC=C1O)C(O)=O	20349.8	35622.1	21051.6	46189.4	25709.3	45016.8
NEG_485	[M-H]-	3-Hydroxyproline	0.108392	0.898557	0.871956	130.053	1.159		Organic acids and derivatives	Carboxylic acids and derivatives	Amino acids, peptides, and analogues	C5H9NO3	BJBUEDPLEOHJGE-BKLSDQPFSA-N	OC1CCNC1C(O)=O	3.41022	30328	11068.9	11930.6	18650.5	15493.1
NEG_91	[M-H]-	3-Hydroxypropionic acid	1.16655	13.1417	0.390357	89.0244	1.22	C01013	Organic acids and derivatives	Hydroxy acids and derivatives	Beta hydroxy acids and derivatives	C3H6O3	ALRHLSYJTWAHJZ-UHFFFAOYSA-N	OCCC(O)=O	1.35148e+06	22404.7	14679.5	25652.3	36018.2	43991
NEG_2599	[M-H]-	3-Phenoxybenzoic acid	0.0756243	1.11984	0.914053	213.058	7.111		Benzenoids	Benzene and substituted derivatives	Diphenylethers	C13H10O3	NXTDJHZGHOFSQG-UHFFFAOYSA-N	OC(=O)C1=CC=CC(=C1)OC2=CC=CC=C2	700.176	7647.11	6805.31	12837	364.327	329.771
NEG_18685	[M-H]-	3,3'-Di-O-Methylellagic Acid 4'-Glucoside	0.352483	0.355246	0.116318	491.078	5.133		Phenylpropanoids and polyketides	Tannins	Hydrolyzable tannins	C22H20O13	PNYQFRZBMVRYFC-CGWYSGAGSA-N	COC1=C2OC(=O)C3=CC(=C(OC)C4=C3C2=C(C=C1O)C(=O)O4)OC5OC(CO)C(O)C(O)C5O	1801.33	43897.3	43366.2	76995.6	47297.9	126420
NEG_982	[M-H]-	3,4-Dihydroxybenzoic acid	0.960914	0.366609	0.0119992	153.02	2.208	C00230	Benzenoids	Benzene and substituted derivatives	Benzoic acids and derivatives	C7H6O4	YQUVCSBJEUQKSH-UHFFFAOYSA-N	OC(=O)C1=CC=C(O)C(=C1)O	134230	251099	174827	538073	605532	384334
NEG_1291	[M-H]-	3,4-Dihydroxyphenylacetic acid	0.0635994	1.16107	0.853202	167.034	2.704	C01161	Benzenoids	Phenols	Benzenediols	C8H8O4	CFFZDZCDUFSOFZ-UHFFFAOYSA-N	OC(=O)CC1=CC=C(O)C(=C1)O	8788.28	2168.49	3572.15	1370.91	9661.94	1480.52
NEG_2124	[M-H]-	3,4,5-Trichlorophenol	1.05672	2.79096	0.433613	194.919	8.794		Benzenoids	Phenols	Halophenols	C6H3Cl3O	GBNHEBQXJVDXSW-UHFFFAOYSA-N	OC1=CC(=C(Cl)C(=C1)Cl)Cl	35.4389	305803	855840	414189	1530.46	509.78
NEG_14758	[M-H]-	3,5-Dihydroxy-2-(4-hydroxyphenyl)-7-[3,4,5-trihydroxy-6-(hydroxymethyl)oxan-2-yl]oxy-2,3-dihydrochromen-4-one	0.852326	7.38564	0.412713	449.109	3.8		Phenylpropanoids and polyketides	Flavonoids	Flavonoid glycosides	C21H22O11	UDIXYHJHYVDNOG-UHFFFAOYSA-N	OCC1OC(OC2=CC(=C3C(=O)C(O)C(OC3=C2)C4=CC=C(O)C=C4)O)C(O)C(O)C1O	756526	12975.3	15064.8	41914.7	25525.2	38788.7
NEG_19259	[M-H]-	3,5-Dihydroxy-4-[3,4,5-trihydroxy-6-[[4-(2-hydroxypropan-2-yl)cyclohexene-1-carbonyl]oxymethyl]oxan-2-yl]oxybenzoic acid	0.120594	2.38204	0.548599	497.162	8.489		Lipids and lipid-like molecules	Saccharolipids		C23H30O12	PEERGVFNQUXNQA-UHFFFAOYSA-N	CC(C)(O)C1CCC(=CC1)C(=O)OCC2OC(OC3=C(O)C=C(C=C3O)C(O)=O)C(O)C(O)C2O	18601.9	506.685	1202.97	1005.23	4450.47	3071.27
NEG_24327	[M+FA-H]-	3,5,5-Trimethyl-4-[3-[(6-O-beta-D-xylopyranosyl-beta-D-glucopyranosyl)oxy]butyl]-2-cyclohexen-1-one	0.230803	0.588128	0.056915	549.252	5.045		Lipids and lipid-like molecules	Fatty Acyls	Fatty acyl glycosides	C24H40O11	LYJZPTUVRHPVNB-WRZQMYAXSA-N	CC(CCC1C(=CC(=O)CC1(C)C)C)O[C@@H]2O[C@H](CO[C@@H]3OC[C@@H](O)[C@H](O)[C@H]3O)[C@@H](O)[C@H](O)[C@H]2O	45550	35158.3	23761.4	54032.6	72521.9	51076.6
NEG_28799	[M-H]-	3'-Galloylquercitrin	1.74918	0.468608	0.471153	599.107	5.701		Phenylpropanoids and polyketides	Flavonoids	Flavonoid glycosides	C28H24O15	JFLAOPHOUGDFGC-ILADGKKJSA-N	CC1OC(OC2=C(OC3=C(C(=CC(=C3)O)O)C2=O)C4=CC(=C(O)C=C4)O)C(O)C(OC(=O)C5=CC(=C(O)C(=C5)O)O)C1O	2.54538e+06	72255.9	54359.9	3.38639e+06	93082.6	2.22251e+06
NEG_17397	[M-H]-	3',4',5,8-Tetrahydroxy-7-methoxy-flavonol 3-O-alpha-l-rhamnopyranoside	1.51924	0.464134	0.130106	477.101	5.3		Phenylpropanoids and polyketides	Flavonoids	Flavonoid glycosides	C22H22O12	PTUBUBVQXWVBPI-QJCKQCIOSA-N	COC1=CC(=C2C(=O)C(=C(OC2=C1O)C3=CC(=C(O)C=C3)O)OC4OC(C)C(O)C(O)C4O)O	6388.17	1.67556e+06	853148	1.74286e+06	2.15816e+06	1.56097e+06
NEG_7812	[M-H]-	4-(3-Hydroxybutyl)phenyl beta-D-glucopyranoside	0.135327	0.62757	0.387098	327.145	1.142		Organic oxygen compounds	Organooxygen compounds	Carbohydrates and carbohydrate conjugates	C16H24O7	SCUSKAVTYFDOEU-YLHHEPAUSA-N	CC(O)CCC1=CC=C(OC2OC(CO)C(O)C(O)C2O)C=C1	4.45377	27545.5	19103.9	33449.4	24478.2	16412.8
NEG_20131	[M+FA-H]-	4-(4-Hydroxyphenyl)-2-butanyl 6-O-[(4xi)-alpha-L-threo-pentofuranosyl]-beta-D-glucopyranoside	0.0392487	0.854744	0.825936	505.199	4.153		Lipids and lipid-like molecules	Fatty Acyls	Fatty acyl glycosides	C21H32O11	DJDISCKFJXDADJ-COUYJTLKSA-N	CC(CCC1=CC=C(O)C=C1)OC2OC(COC3OC(CO)C(O)C3O)C(O)C(O)C2O	377.147	1171.87	4168.49	1155.11	3687.48	1846.55
NEG_5907	[M-H]-	4-(Decan-4-yl)benzenesulfonic acid	0.16973	1.0245	0.9421	297.153	9.316		Benzenoids	Benzene and substituted derivatives	Benzenesulfonic acids and derivatives	C16H26O3S	NANHIUZYPFDGJS-UHFFFAOYSA-N	CCCCCCC(CCC)C1=CC=C(C=C1)[S](O)(=O)=O	14256.7	43466.4	43412.8	38160.1	34954.9	25601.9
NEG_24119	[M+FA-H]-	4-[(E)-3-[(2R,3R,4S,5S,6R)-3-[(2S,3R,4R)-3,4-Dihydroxy-4-(hydroxymethyl)oxolan-2-yl]oxy-4,5-dihydroxy-6-(hydroxymethyl)oxan-2-yl]oxybut-1-enyl]-3,5,5-trimethylcyclohex-2-en-1-one	0.238141	9.17335	0.117572	547.237	5.396		Lipids and lipid-like molecules	Fatty Acyls	Fatty acyl glycosides	C24H38O11	IDPRQTHSAHGSDW-BTOUMFIXSA-N	CC(OC1OC(CO)C(O)C(O)C1OC2OCC(O)(CO)C2O)C=CC3C(=CC(=O)CC3(C)C)C	31451.4	31904.1	2283.01	2060.53	2447.03	2647.79
NEG_21330	[M+FA-H]-	4-Allyl-o-phenylenebis(beta-D-glucopyranoside)	0.12189	0.494395	0.25996	519.165	3.667		Organic oxygen compounds	Organooxygen compounds	Carbohydrates and carbohydrate conjugates	C21H30O12	SFQLDKSMEHBZRN-LWZURRPWSA-N	OCC1OC(OC2=CC=C(CC=C)C=C2OC3OC(CO)C(O)C(O)C3O)C(O)C(O)C1O	884.713	14987.5	3908.63	15718.7	7679.77	16611.7
NEG_3476	[M-H]-	4-Hydroxy-2,5,6-trichloroisophthalonitrile	0.0564087	13.5075	0.358664	244.908	6.371		Benzenoids	Benzene and substituted derivatives	Benzonitriles	C8HCl3N2O	MDQKYGOECVSPIW-UHFFFAOYSA-N	OC1=C(C#N)C(=C(C#N)C(=C1Cl)Cl)Cl	3010.37	94.6871	139.733	206.401	0	33.8209
NEG_8763	[M-H]-	4-Hydroxy-2',3,4',6'-tetramethoxychalcone	0.205859	0.428221	0.0625424	343.117	6.379		Phenylpropanoids and polyketides	Linear 1,3-diarylpropanoids	Cinnamylphenols	C19H20O6	BAHHZVVNFAOLAZ-SOFGYWHQSA-N	COC1=CC(=C(C(=O)\\C=C\\C2=CC(=C(O)C=C2)OC)C(=C1)OC)OC	1923.92	21156.7	23314.6	28612	43617.1	36115.1
NEG_10380	[M-H]-	4-Hydroxy-5-[(2S,3R,4S,5S,6R)-3,4,5-trihydroxy-6-(hydroxymethyl)oxan-2-yl]oxy-1H-benzo[f][2]benzofuran-3-one	0.240278	0.443938	0.0533988	377.084	13.56		Organic oxygen compounds	Organooxygen compounds	Carbohydrates and carbohydrate conjugates	C18H18O9	SGQJDTLFQCDZGS-UQEKQVNISA-N	OCC1OC(OC2=CC=CC3=C2C(=C4C(=O)OCC4=C3)O)C(O)C(O)C1O	13867.3	26756.5	6375.54	28167.5	42413.2	35288.7
NEG_371	[M-H]-	4-Hydroxybenzaldehyde	0.272781	0.408847	0.0784838	121.028	3.041	C00633	Organic oxygen compounds	Organooxygen compounds	Carbonyl compounds	C7H6O2	RGHHSNMVTDWUBI-UHFFFAOYSA-N	OC1=CC=C(C=O)C=C1	1938.74	40376.2	13657.3	46482.8	42648	47772
NEG_1195	[M-H]-	4-Hydroxycinnamic acid	0.312595	0.881811	0.799552	163.04	2.557	C00811	Phenylpropanoids and polyketides	Cinnamic acids and derivatives	Hydroxycinnamic acids and derivatives	C9H8O3	NGSWKAQJJWESNS-ZZXKWVIFSA-N	OC(=O)C=CC1=CC=C(O)C=C1	42719.9	214470	126921	76162	212107	147324
NEG_927	[M-H]-	4-Hydroxyphenyl acetate	0.0740244	0.742706	0.569296	151.038	3.45	C13636	Benzenoids	Phenol esters		C8H8O3	HBMCQTHGYMTCOF-UHFFFAOYSA-N	CC(=O)OC1=CC=C(O)C=C1	568.295	12982.1	6066.47	7880.54	10169.1	8363.05
NEG_914	[M-H]-	4-Hydroxyphenylacetic acid	0.125475	11.2092	0.372135	151.003	2.017	C00642	Benzenoids	Phenols	1-hydroxy-2-unsubstituted benzenoids	C8H8O3	XQXPVVBIMDBYFF-UHFFFAOYSA-N	OC(=O)CC1=CC=C(O)C=C1	15213.2	554.574	451.164	431.825	581.629	433.482
NEG_813	[M-H]-	4-Hydroxyquinoline	0.136359	0.464937	0.340641	144.044	2.748		Organoheterocyclic compounds	Quinolines and derivatives	Quinolones and derivatives	C9H7NO	PMZDQRJGMBOQBF-UHFFFAOYSA-N	O=C1C=CNC2=C1C=CC=C2	197.427	15888.5	6296.05	28757.7	12061	7321.24
NEG_4222	[M-C6H10O4-H]-	4-Malonyl ononin	0.183299	0.408769	0.0626434	267.066	6.871		Phenylpropanoids and polyketides	Isoflavonoids	Isoflavonoid O-glycosides	C25H24O12	QMHKWODSZRYFTD-FSIWAFGDSA-N	COC1=CC=C(C=C1)C2=COC3=C(C=CC(=C3)O[C@@H]4O[C@H](CO)[C@@H](OC(=O)CC(O)=O)[C@H](O)[C@H]4O)C2=O	5178.15	13983.1	8823.89	13926.3	29373.2	25162.5
NEG_1647	[M-H]-	4-Methoxycinnamic acid	0.142407	0.424615	0.144441	177.053	5.789		Phenylpropanoids and polyketides	Cinnamic acids and derivatives	Cinnamic acids	C10H10O3	AFDXODALSZRGIH-UHFFFAOYSA-N	COC1=CC=C(C=CC(O)=O)C=C1	396.093	12368.9	7022.32	10126.9	22136	14337.7
NEG_2038	[M-H]-	4-Methylesculetin	0.233222	0.595153	0.301201	191.036	5.361		Phenylpropanoids and polyketides	Coumarins and derivatives	Hydroxycoumarins	C10H8O4	KVOJTUXGYQVLAJ-UHFFFAOYSA-N	CC1=CC(=O)OC2=C1C=C(O)C(=C2)O	163.247	73965.6	53582.1	53340.9	89965.2	71278.9
NEG_1026	[M-H]-	4-Nitrocatechol	0.818166	0.8163	0.683913	154.015	3.887	C02235	Benzenoids	Phenols	Nitrophenols	C6H5NO4	XJNPNXSISMKQEX-UHFFFAOYSA-N	OC1=CC=C(C=C1O)[N](=O)=O	4499.17	1.10882e+06	1.00378e+06	1.01788e+06	717140	858505
NEG_745	[M-H]-	4-Nitrophenol	0.0908361	0.511902	0.46475	138.054	1.687	C00870	Benzenoids	Phenols	Nitrophenols	C6H5NO3	BTJIUGUIPKRLHP-UHFFFAOYSA-N	OC1=CC=C(C=C1)[N](=O)=O	44.3601	13624.3	455.582	10027.8	3074.51	14489.4
NEG_1799	[M-H]-	4-Pyridoxic acid	0.173887	0.629975	0.64022	182.045	1.694	C00847	Organoheterocyclic compounds	Pyridines and derivatives	Pyridinecarboxylic acids and derivatives	C8H9NO4	HXACOUQIXZGNBF-UHFFFAOYSA-N	CC1=NC=C(CO)C(=C1O)C(O)=O	360.887	94335.3	3504.33	59393.5	10015	86471.6
NEG_350	[M-H]-	4-Vinylphenol	0.306493	0.790434	0.598951	119.049	3.884	C05627	Benzenoids	Benzene and substituted derivatives	Styrenes	C8H8O	FUGYGGDSWSUORM-UHFFFAOYSA-N	OC1=CC=C(C=C)C=C1	49491.3	278306	155854	274384	164409	173089
NEG_5582	[M-H]-	4,5,6,7,8,9-Hexahydro-11,13-dihydroxy-4-methyl-, (S)-2H-3-benzoxacyclododecin-2,10(1H)-dione	0.805996	122.876	0.375706	291.125	5.081		Phenylpropanoids and polyketides	Macrolides and analogues		C16H20O5	VDUIGYAPSXCJFC-UHFFFAOYSA-N	CC1CCCCCC(=O)C2=C(CC(=O)O1)C=C(O)C=C2O	623340	775.774	873.926	1997.79	1797.33	1291.21
NEG_6043	[M-H]-	4',7-Di-O-methylnaringenin	0.664467	0.853957	0.382302	299.094	8.143		Phenylpropanoids and polyketides	Flavonoids	O-methylated flavonoids	C17H16O5	CKEXCBVNKRHAMX-UHFFFAOYSA-N	COC1=CC=C(C=C1)C2CC(=O)C3=C(O2)C=C(OC)C=C3O	1.29142e+06	1.49537e+06	1.29356e+06	1.94187e+06	1.16587e+06	1.67042e+06
NEG_9130	[M-H]-	5-(5-Methoxycarbonyl-5,8a-dimethyl-2-methylidene-3,4,4a,6,7,8-hexahydro-1H-naphthalen-1-yl)-3-methylpentanoic acid	0.903325	336.909	0.374614	349.238	11.543		Lipids and lipid-like molecules	Prenol lipids	Diterpenoids	C21H34O4	WTDIRAZPDUAJEB-UHFFFAOYSA-N	COC(=O)C1(C)CCCC2(C)C(CCC(C)CC(O)=O)C(=C)CCC12	780793	232.825	449.774	700.536	662.075	956.938
NEG_10710	[M-H]-	5-[(Z)-12-(3,5-Dihydroxyphenyl)dodec-8-enyl]benzene-1,3-diol	0.0920754	0.588068	0.229679	383.221	8.815		Benzenoids	Phenols	Benzenediols	C24H32O4	JDIDEXHTJXTVES-HYXAFXHYSA-N	OC1=CC(=CC(=C1)O)CCCCCCCC=CCCCC2=CC(=CC(=C2)O)O	11648.8	9422.32	7840.76	15481.8	24834.9	8847.59
NEG_12275	[M-H]-	5-[(Z)-14-(3,5-Dihydroxyphenyl)tetradec-10-enyl]benzene-1,3-diol	0.107817	1.45074	0.607445	411.24	10.429		Benzenoids	Phenols	Benzenediols	C26H36O4	PFIQXUYXVYYERO-ALCCZGGFSA-N	OC1=CC(=CC(=C1)O)CCCCCCCCCC=CCCCC2=CC(=CC(=C2)O)O	1742.19	20573.8	9229.72	9513.45	3017.57	9213.59
NEG_2823	[M-H]-	5-Ammonio-2-naphthalenesulfonate	0.277003	0.350486	0.171081	222.024	2.637		Benzenoids	Naphthalenes	Naphthalene sulfonic acids and derivatives	C10H9NO3S	UWPJYQYRSWYIGZ-UHFFFAOYSA-N	NC1=C2C=CC(=CC2=CC=C1)[S](O)(=O)=O	392.941	35624.8	10838.6	72044	27374.5	34271.5
NEG_9246	[M-H]-	5-Caffeoylquinic acid	0.0480221	0.836515	0.728664	353.086	2.527					C16H18O9	CWVRJTMFETXNAD-XYXZIBEBSA-N	O=C(O)C1(O)CC(O)C(O)C(OC(=O)C=CC2=CC=C(O)C(O)=C2)C1	7686.05	3719.84	1394.84	3177.87	4588.73	7535.85
NEG_29613	[M-H]-	5-Hydroxy-2-(3-hydroxy-4-methoxyphenyl)-7-[(2S,3R,4S,5S,6R)-3,4,5-trihydroxy-6-[[(2R,3R,4R,5R,6S)-3,4,5-trihydroxy-6-methyloxan-2-yl]oxymethyl]oxan-2-yl]oxy-2,3-dihydrochromen-4-one	0.0651785	2.18482	0.288557	609.177	5.124		Phenylpropanoids and polyketides	Flavonoids	Flavonoid glycosides	C28H34O15	QUQPHWDTPGMPEX-LLHRBZKSSA-N	COC1=CC=C(C=C1O)C2CC(=O)C3=C(O)C=C(OC4OC(COC5OC(C)C(O)C(O)C5O)C(O)C(O)C4O)C=C3O2	4016.36	1758.95	835.314	981.371	1454.51	589.826
NEG_5243	[M-H]-	5-Hydroxy-2-(4-hydroxyphenyl)-7-methoxychroman-4-one	0.801454	0.965951	0.878012	285.077	7.218		Phenylpropanoids and polyketides	Flavonoids	O-methylated flavonoids	C16H14O5	DJOJDHGQRNZXQQ-UHFFFAOYSA-N	COC1=CC2=C(C(=O)CC(O2)C3=CC=C(O)C=C3)C(=C1)O	2.03953e+06	1.31997e+06	1.15839e+06	1.56409e+06	1.24676e+06	1.8663e+06
NEG_6026	[M-H]-	5-Hydroxy-3',4'-dimethoxyflavanone	0.413307	0.384687	0.0669022	299.091	6.262		Phenylpropanoids and polyketides	Flavonoids	O-methylated flavonoids	C17H16O5	GREZGBHTSQIMAQ-UHFFFAOYSA-N	COC1=CC=C(C=C1OC)C2CC(=O)C3=C(O2)C=CC=C3O	59919.4	37430.3	27050.6	70502.3	98339.9	154538
NEG_1632	[M-H]-	5,7-Dihydroxychromone	0.22414	0.748235	0.423985	177.018	3.799					C9H6O4	NYCXYKOXLNBYID-UHFFFAOYSA-N	C1=COC2=CC(=CC(=C2C1=O)O)O	30105.5	129324	86291.2	129505	109603	89291.4
NEG_3811	[M-H]-	5,7-Dihydroxyflavanone	3.93275	12.1218	0.390137	255.067	7.416		Phenylpropanoids and polyketides	Flavonoids	Flavans	C15H12O4	URFCJEUYXNAHFI-UHFFFAOYSA-N	OC1=CC(=C2C(=O)CC(OC2=C1)C3=CC=CC=C3)O	1.53648e+07	232974	266018	439063	337156	532484
NEG_8839	[M-H]-	5,7,3',4'-Tetrahydroxy-6,8-dimethoxyflavone	0.273852	0.326201	0.171042	345.06	6.496		Phenylpropanoids and polyketides	Flavonoids	O-methylated flavonoids	C17H14O8	GLMWHQIFJIURES-UHFFFAOYSA-N	COC1=C(O)C2=C(OC(=CC2=O)C3=CC(=C(O)C=C3)O)C(=C1O)OC	3062.7	29418.2	15659.3	24897.6	85237	37443.9
NEG_15750	[M-H]-	5,8-Dihydroxy-2-(4-hydroxyphenyl)-7-methoxy-3-[(2S,3R,4R,5R,6S)-3,4,5-trihydroxy-6-methyloxan-2-yl]oxychromen-4-one	0.717664	0.943744	0.966283	461.106	5.823		Phenylpropanoids and polyketides	Flavonoids	Flavonoid glycosides	C22H22O11	SSVHQKZUFBBLJY-OELQVNMVSA-N	COC1=CC(=C2C(=O)C(=C(OC2=C1O)C3=CC=C(O)C=C3)OC4OC(C)C(O)C(O)C4O)O	930277	18816	9783.41	925972	48104.2	41958.9
NEG_50098	[M-H]-	6-Deoxy-alpha-L-mannopyranosyl-(1->4)-beta-D-glucopyranosyl-(1->6)-1-O-[(3beta)-3,23-dihydroxy-23,28-dioxoolean-12-en-28-yl]-beta-D-glucopyranose	0.0335151	0.865715	0.681675	955.478	10.847		Lipids and lipid-like molecules	Prenol lipids	Terpene glycosides	C48H76O19	LEXLFIULVWKBPT-FXLGSDSZSA-N	CC1OC(OC2C(O)C(O)C(OCC3OC(OC(=O)C45CCC(C)(C)CC4C6=CCC7C8(C)CCC(O)C(C)(C8CCC7(C)C6(C)CC5)C(O)=O)C(O)C(O)C3O)OC2CO)C(O)C(O)C1O	3727.98	1184.09	1861.53	2765.95	2163.71	2894.63
NEG_26116	[M+FA-H]-	6-Hydroxy-2,6,10,10-tetramethyl-1-oxaspiro[4.5]dec-8-yl 6-O-[(2R,3R,4R)-3,4-dihydroxy-4-(hydroxymethyl)tetrahydro-2-furanyl]-beta-D-glucopyranoside	0.178192	0.624536	0.114702	567.262	6.396		Organic oxygen compounds	Organooxygen compounds	Carbohydrates and carbohydrate conjugates	C24H42O12	PXBJHMFLTVPWQM-BJPXCADXSA-N	CC1CCC2(O1)C(C)(C)CC(CC2(C)O)O[C@@H]3O[C@H](CO[C@@H]4OC[C@](O)(CO)[C@H]4O)[C@@H](O)[C@H](O)[C@H]3O	19100	43226.3	25806.6	44229.1	56837.6	40050.9
NEG_5199	[M-H]-	6-Hydroxyapigenin	0.515686	7.94517	0.399189	285.039	4.425	C10184	Phenylpropanoids and polyketides	Flavonoids	Flavones	C15H10O6	JVXZRQGOGOXCEC-UHFFFAOYSA-N	OC1=CC=C(C=C1)C2=CC(=O)C3=C(O)C(=C(O)C=C3O2)O	270564	6724.72	7082.94	13820.1	11192.9	10778.8
NEG_31195	[M-H]-	6-O-(4-Hydroxycinnamoyl)-beta-D-glucopyranose 1,2-bis(3,4,5-trihydroxybenzoate)	0.209984	1.09363	0.845288	629.112	5.603		Phenylpropanoids and polyketides	Tannins		C29H26O16	QDSDUIWGMCGLHI-VTULTLKESA-N	OC1C(O)C(OC(=O)C2=CC(=C(O)C(=C2)O)O)C(OC1COC(=O)C=CC3=CC=C(O)C=C3)OC(=O)C4=CC(=C(O)C(=C4)O)O	31275.4	115557	51407.9	48318.8	53460.4	79488.5
NEG_43895	[M-H]-	6-O-beta-D-Glucopyranosyl-1-O-[(3beta,5xi,9xi)-3,19,24-trihydroxy-24,28-dioxours-12-en-28-yl]-beta-D-glucopyranose	0.0229181	0.614685	0.526887	825.428	8.613		Lipids and lipid-like molecules	Prenol lipids	Terpene glycosides	C42H66O16	LCQFYEBJTAIMPC-PVSIORMYSA-N	CC1CCC2(CCC3(C)C(=CCC4C5(C)CCC(O)C(C)(C5CCC34C)C(O)=O)C2C1(C)O)C(=O)OC6OC(COC7OC(CO)C(O)C(O)C7O)C(O)C(O)C6O	663.572	852.622	516.422	681.04	2296.68	329.042
NEG_20334	[M+FA-H]-	6-O-Pentopyranosyl-1-O-[(2,6,6-trimethyl-1-cyclohexen-1-yl)carbonyl]-beta-D-glucopyranose	0.323618	0.883532	0.850826	507.207	6.387		Organic oxygen compounds	Organooxygen compounds	Carbohydrates and carbohydrate conjugates	C21H34O11	JGMROMZJBQKIDK-RHDZYIEMSA-N	CC1=C(C(=O)O[C@@H]2O[C@H](COC3OCC(O)C(O)C3O)[C@@H](O)[C@H](O)[C@H]2O)C(C)(C)CCC1	6083.96	315988	100824	146618	186227	145799
NEG_14410	[M-H]-	7-Formyl-4,6'-dihydroxy-6-(hydroxymethyl)-2',5',5',8a'-tetramethyl-3',4',4a',5',6',7',8',8a'-octahydro-2'H,3H-spiro[1-benzofuran-2,1'-naphthalen]-7'-yl acetate	0.167228	0.600494	0.245644	445.22	8.528		Organoheterocyclic compounds	Benzofurans		C25H34O7	GWNPFKVCTQYFQY-UHFFFAOYSA-N	CC1CCC2C(C)(C)C(O)C(CC2(C)C13CC4=C(O3)C(=C(CO)C=C4O)C=O)OC(C)=O	26718.4	31675.9	11093.2	55151.3	38285.2	22280.8
NEG_40022	[M-H]-	7-O-Methylquercetin-3-O-galactoside-6''-rhamnoside	0.0226804	0.581106	0.533516	769.204	3.288		Phenylpropanoids and polyketides	Flavonoids	Flavonoid glycosides	C34H42O20	NMGVHLDIHNFGQB-UHFFFAOYNA-N	COC1=CC(=C2C(=O)C(=C(OC2=C1)C3=CC(=C(O)C=C3)O)OC4OC(COC5OC(C)C(O)C(OC6OC(C)C(O)C(O)C6O)C5O)C(O)C(O)C4O)O	136.922	672.155	94.7381	0	795.355	759.98
NEG_18357	[M-H]-	7-Sulfocholic acid	0.31565	0.711453	0.527621	487.246	9.355		Lipids and lipid-like molecules	Steroids and steroid derivatives	Bile acids, alcohols and derivatives	C24H40O8S	RRVLNNMINXAIKC-OELDTZBJSA-N	C[C@H](CCC(O)=O)[C@H]1CC[C@H]2[C@@H]3[C@@H](C[C@@H]4C[C@H](O)CC[C@]4(C)[C@H]3C[C@H](O)[C@]12C)O[S](O)(=O)=O	7935.96	137333	135244	199960	92364.1	101959
NEG_5589	[M-H]-	8-(2-Oxo-5-pent-2-enylcyclopent-3-en-1-yl)octanoic acid	0.397085	0.262724	0.13702	291.195	7.872		Lipids and lipid-like molecules	Fatty Acyls	Eicosanoids	C18H28O3	IYEHRWJNUWAXAD-UHFFFAOYSA-N	CCC=CCC1C=CC(=O)C1CCCCCCCC(O)=O	294.22	36510.4	23287.8	105490	19498.2	103740
NEG_6047	[M-H]-	8-(4-Sulfophenyl)octanoic acid	0.271073	1.06847	0.898564	299.095	7.748		Benzenoids	Benzene and substituted derivatives	Benzenesulfonic acids and derivatives	C14H20O5S	KCKCVKAROJRVBA-UHFFFAOYSA-N	OC(=O)CCCCCCCC1=CC=C(C=C1)[S](O)(=O)=O	171398	56271.2	42794	60253.8	96773.4	96104.1
NEG_5762	[M-H]-	8-Butyl-5-ethyl-5,6,7,8-tetrahydronaphthalene-2-sulfonic acid	0.446055	0.449913	0.157727	295.134	7.391		Benzenoids	Tetralins		C16H24O3S	ZANYAOJPVAPRQY-UHFFFAOYSA-N	CCCCC1CCC(CC)C2=C1C=C(C=C2)[S](O)(=O)=O	286.042	134720	77993.5	156639	104052	212732
NEG_10487	[M-H]-	8-Desoxygartanin	0.0409534	1.28732	0.734322	379.148	8.484					C23H24O5	GVQOVMKBYJKZSY-UHFFFAOYSA-N	CC(=CCC1=C(C(=C2C(=C1O)C(=O)C3=C(O2)C(=CC=C3)O)CC=C(C)C)O)C	11.8351	3374.23	1528.62	1750.25	887.331	1180.2
NEG_5685	[M-H]-	8-hydroxyoctadeca-9,12,15-trienoic acid	0.613668	0.586694	0.275009	293.212	9.692		Lipids and lipid-like molecules	Fatty Acyls	Fatty acids and conjugates	C18H30O3	NFIYYIXFARWVBH-UHFFFAOYSA-N	O=C(O)CCCCCCC(O)C=CCC=CCC=CCC	7857.99	503046	267731	472540	455241	399377
NEG_3763	[M-H]-	9-Hexadecenoic acid	0.827925	0.313818	0.127054	253.216	11.225		Lipids and lipid-like molecules	Fatty Acyls	Fatty acids and conjugates	C16H30O2	SECPZKHBENQXJG-BQYQJAHWSA-N	CCCCCC\\C=C\\CCCCCCCC(O)=O	79.4569	256033	163658	230057	397818	709751
NEG_5689	[M-H]1-	9-HOTrE	1.03064	0.384472	0.141483	293.214	9.432		Lipids and lipid-like molecules	Fatty Acyls	Lineolic acids and derivatives	C18H30O3	RIGGEAZDTKMXSI-CUHSZNQNSA-N	CC\\C=C/C/C=C\\C=C\\C(O)CCCCCCCC(O)=O	11517.9	532272	330625	631586	483072	1.15967e+06
NEG_6867	[M-H]-	9-Hydroperoxyoctadeca-10,12-dienoic acid	0.602498	3.87839	0.456165	311.221	9.022		Lipids and lipid-like molecules	Fatty Acyls	Lineolic acids and derivatives	C18H32O4	JGUNZIWGNMQSBM-UHFFFAOYSA-N	CCCCCC=CC=CC(CCCCCCCC(O)=O)OO	414217	22070.6	8294.02	30898.7	25582.9	58148.7
NEG_5773	[M-H]1-	9-Hydroxy-10E,12Z-octadecadienoic acid	1.84884	0.334706	0.13264	295.228	9.827		Lipids and lipid-like molecules	Fatty Acyls	Lineolic acids and derivatives	C18H32O3	NPDSHTNEKLQQIJ-ZJHFMPGASA-N	CCCCC\\C=C/C=C/C(O)CCCCCCCC(O)=O	38321.7	1.30695e+06	849413	1.81004e+06	1.24736e+06	3.49966e+06
NEG_25343	[M+FA-H]-	9-Hydroxy-2,6,12-trimethyl-12-[2-[3,4,5-trihydroxy-6-(hydroxymethyl)oxan-2-yl]oxyethyl]-15-oxatetracyclo[8.4.1.01,10.02,7]pentadecane-6-carboxylic acid	0.42011	0.748067	0.567333	559.272	8.381		Lipids and lipid-like molecules	Fatty Acyls	Fatty acyl glycosides	C26H42O10	YKVWDRYOZQXKSV-UHFFFAOYSA-N	CC1(CCOC2OC(CO)C(O)C(O)C2O)CCC34OC3(C1)C(O)CC5C(C)(CCCC45C)C(O)=O	21834.1	222530	292526	342593	206712	168398
NEG_21008	[M-H]-	9-Hydroxy-5b,8,11a-trimethyl-1-prop-1-en-2-yl-1,2,3,4,5,6,7,7a,9,10,11,11b,12,13,13a,13b-hexadecahydrocyclopenta[a]chrysene-3a,5a,8-tricarboxylic acid	0.111045	0.536775	0.0437042	515.299	7.02		Lipids and lipid-like molecules	Prenol lipids	Triterpenoids	C30H44O7	FTGKHGAVFGGOMW-UHFFFAOYSA-N	CC(=C)C1CCC2(CCC3(C(CCC4C5(C)CCC(O)C(C)(C5CCC34C)C(O)=O)C12)C(O)=O)C(O)=O	4135.73	9267.27	11659.9	15711.5	17394.5	13585.6
NEG_6770	[M-H]-	9-Oxo-11-(3-pentyloxiran-2-YL)undec-10-enoic acid	0.694474	0.232382	0.059425	309.208	8.821		Lipids and lipid-like molecules	Fatty Acyls	Fatty acids and conjugates	C18H30O4	RCMABBHQYMBYKV-UHFFFAOYSA-N	CCCCCC1OC1C=CC(=O)CCCCCCCC(O)=O	19137.6	80807.2	54358.7	183785	136677	343545
NEG_8015	[M-H]-	9,12,13-Trihydroxyoctadec-10-enoic acid	1.97603	0.244982	0.138017	329.235	7.398		Lipids and lipid-like molecules	Fatty Acyls	Fatty acids and conjugates	C18H34O5	MDIUMSLCYIJBQC-UHFFFAOYSA-N	CCCCCC(O)C(O)C=CC(O)CCCCCCCC(O)=O	7692.4	945016	464117	2.13732e+06	556253	3.08982e+06
NEG_7837	[M-H]-	9,12,13-Trihydroxyoctadeca-10,15-dienoic acid	1.6479	0.294603	0.155489	327.219	7.054		Lipids and lipid-like molecules	Fatty Acyls	Lineolic acids and derivatives	C18H32O5	MKYUCBXUUSZMQB-UHFFFAOYSA-N	CCC=CCC(O)C(O)C=CC(O)CCCCCCCC(O)=O	19223	785508	493358	1.80511e+06	394904	2.20622e+06
NEG_6322	[M-H]-	Abietic acid	0.135812	0.620733	0.299299	301.217	11.249	C06087	Lipids and lipid-like molecules	Prenol lipids	Diterpenoids	C20H30O2	RSWGJHLUYNHPMX-ONCXSQPRSA-N	CC(C)C1=CC2=CCC3C(C)(CCCC3(C)C(O)=O)C2CC1	143.737	26043.3	20932.3	22548.5	25830.3	27530.5
NEG_4996	[M-H]-	Acacetin	0.0550091	0.771984	0.196797	283.056	8.793	C01470	Phenylpropanoids and polyketides	Flavonoids	O-methylated flavonoids	C16H12O5	DANYIYRPLHHOCZ-UHFFFAOYSA-N	COC1=CC=C(C=C1)C2=CC(=O)C3=C(O2)C=C(O)C=C3O	15482.6	17524.6	10245.1	20999.9	19655.2	15372.5
NEG_1739	[M-H]-	Acamprosate	0.123348	0.425888	0.0679524	180.031	2.354		Organic acids and derivatives	Organic sulfonic acids and derivatives	Organosulfonic acids and derivatives	C5H11NO4S	AFCGFAGUEYAMAO-UHFFFAOYSA-N	CC(O)=NCCC[S](O)(=O)=O	5771.39	4544.37	1241.65	12004.4	6535.01	8597.81
NEG_27091	[M-H]-	Acanthoside B	0.204935	6.65063	0.402076	579.207	5.007		Lignans, neolignans and related compounds	Lignan glycosides		C28H36O13	WEKCEGQSIIQPAQ-IRBNZIFYSA-N	COC1=C(O)C(=CC(=C1)C2OCC3C2COC3C4=CC(=C(OC5OC(CO)C(O)C(O)C5O)C(=C4)OC)OC)OC	43077.1	1830.76	1019.14	1605.62	2669.99	2630.05
NEG_613	[M-H]-	Adenine	0.610534	5.51735	0.195824	134.047	1.897	C00147	Organoheterocyclic compounds	Imidazopyrimidines	Purines and purine derivatives	C5H5N5	GFFGJBXGBJISGV-UHFFFAOYSA-N	NC1=C2N=CN=C2[NH]C=N1	275106	103249	31928.2	21451.3	26425.8	26485.3
NEG_4209	[M-H]-	Adenosine	0.19209	60.6425	0.369859	266.086	2.486	C00212	Nucleosides, nucleotides, and analogues	Purine nucleosides		C10H13N5O4	OIRDTQYFTABQOQ-KQYNXXCUSA-N	NC1=NC=NC2=C1N=C[N]2C3OC(CO)C(O)C3O	35097.1	386.984	225.723	42.8275	232.698	313.332
NEG_17403	[M+FA-H]-	Afzelin	0.123776	0.617161	0.100558	477.106	5.672		Phenylpropanoids and polyketides	Flavonoids	Flavonoid glycosides	C21H20O10	SOSLMHZOJATCCP-AEIZVZFYSA-N	CC1OC(OC2=C(OC3=C(C(=CC(=C3)O)O)C2=O)C4=CC=C(O)C=C4)C(O)C(O)C1O	9287.55	17955.6	12532.3	27210.8	19655.8	17582.5
NEG_23098	[M-H]-	Alisol A	0.452769	0.631495	0.096796	535.362	10.473		Lipids and lipid-like molecules	Prenol lipids	Triterpenoids	C30H50O5	HNOSJVWYGXOFRP-UNPOXIGHSA-N	CC(CC(O)C(O)C(C)(C)O)C1=C2CC(O)C3C4(C)CCC(=O)C(C)(C)C4CCC3(C)C2(C)CC1	119545	282890	285008	390482	392707	305407
NEG_1703	[M-H]-	alpha D-Galactose	0.417121	5.41868	0.399021	179.055	3.894	C00984	Organic oxygen compounds	Organooxygen compounds	Carbohydrates and carbohydrate conjugates	C6H12O6	WQZGKKKJIJFFOK-PHYPRBDBSA-N	OC[C@H]1O[C@H](O)[C@H](O)[C@@H](O)[C@H]1O	180466	10567	7416.44	15840.1	11049.9	9733.2
NEG_45369	[M-H]-	alpha-Chaconine	0.164594	8.40266	0.406156	850.49	12.673					C45H73NO14	TYNQWWGVEGFKRU-UHFFFAOYNA-N	OCC1OC(OC2CC3=CCC4C(CCC5(C)C4CC6N7CC(C)CCC7C(C)C65)C3(C)CC2)C(OC8OC(C)C(O)C(O)C8O)C(O)C1OC9OC(C)C(O)C(O)C9O	27923.4	622.998	346.391	1280.59	850.777	1307.16
NEG_38688	[M-H]-	alpha-Hederin	0.16646	1.02543	0.952587	749.443	11.323		Lipids and lipid-like molecules	Prenol lipids	Triterpenoids	C41H66O12	KEOITPILCOILGM-UHFFFAOYSA-N	CC1OC(OC2C(O)C(O)COC2OC3CCC4(C)C(CCC5(C)C4CC=C6C7CC(C)(C)CCC7(CCC56C)C(O)=O)C3(C)CO)C(O)C(O)C1O	49267.4	136482	56452.1	91599.1	95461.5	49133.8
NEG_4360	[M-H]-	Alpinetin	0.786104	0.373278	0.0686105	269.082	6.617					C16H14O4	QQQCWVDPMPFUGF-ZDUSSCGKSA-N	COC1=CC(=CC2=C1C(=O)C[C@H](O2)C3=CC=CC=C3)O	7524.56	232834	244983	338205	373927	588085
NEG_36685	[M-H]-	Amatain	0.0928571	0.843844	0.7665	715.35	10.438		Alkaloids and derivatives	Aspidospermatan-type alkaloids		C43H48N4O6	RZBFPDQKWUWUCK-UHFFFAOYNA-N	COC(=O)C1=C2NC3=CC=CC=C3C24CCN5C6OC78C9CC%10%11CCOC%10CCN%12CCC7(C%11%12)C%13=C(N8CC6(C9)C%14OCCC%14(C1)C45)C(=CC=C%13)OC	1066.07	24276.4	10749.7	11656.3	13068	18046.8
NEG_23188	[M-H]-	Amentoflavone	0.374479	0.23636	0.00500958	537.078	7.166	C10018	Phenylpropanoids and polyketides	Flavonoids	Biflavonoids and polyflavonoids	C30H18O10	YUSWMAULDXZHPY-UHFFFAOYSA-N	OC1=CC=C(C=C1)C2=CC(=O)C3=C(O2)C(=C(O)C=C3O)C4=C(O)C=CC(=C4)C5=CC(=O)C6=C(O)C=C(O)C=C6O5	172.188	17633.9	26076.2	66407.1	64545.1	54706.1
NEG_12154	[M-H]-	Amorphigenin	3.79722	28.5406	0.377774	409.134	6.285		Phenylpropanoids and polyketides	Isoflavonoids	Rotenoids	C23H22O7	ZJMLELXRQUXRIU-HBGVWJBISA-N	COC1=C(OC)C=C2[C@H]3[C@@H](COC2=C1)OC4=C(C=CC5=C4C[C@@H](O5)C(=C)CO)C3=O	1.39865e+07	172137	77958.6	242508	96968.7	159340
NEG_9046	[M-H]-	Anacardic acid	0.0296786	0.525143	0.640601	347.254	11.645	C10759	Benzenoids	Benzene and substituted derivatives	Benzoic acids and derivatives	C22H36O3	ADFWQBGTDJIESE-UHFFFAOYSA-N	CCCCCCCCCCCCCCCC1=C(C(O)=O)C(=CC=C1)O	0	983.84	3308.39	357.863	349.41	7466.18
NEG_8161	[M-H]-	Anasterone	0.0349416	1.19229	0.719233	331.225	10.342		Lipids and lipid-like molecules	Steroids and steroid derivatives	Androstane steroids	C21H32O3	ICMWWNHDUZJFDW-CCTJMHFWSA-N	CC1(O)CCC2C3CCC4CC(=O)C(CC4(C)C3CCC12C)=CO	952.289	296.834	1661.15	905.425	621.825	913.655
NEG_15484	[M-H]-	Andrastin C	0.752313	18.3638	0.391135	457.268	11.773		Lipids and lipid-like molecules	Steroids and steroid derivatives	Steroid esters	C27H38O6	LBBHTACWNVOYKN-SNQWNFAUSA-N	CC(=O)O[C@H]1CC[C@]2(C)[C@H](CC[C@@]3(C)[C@H]2C=C(C)[C@@]4(C)C(=C(C)C(=O)[C@@]34C(O)=O)O)C1(C)C	560185	573.202	5375.15	12157.3	7766.12	10905.3
NEG_7787	[M-H]-	Androsin	0.185578	1.54499	0.441171	327.108	2.992		Organic oxygen compounds	Organooxygen compounds	Carbohydrates and carbohydrate conjugates	C15H20O8	QUOZWMJFTQUXON-UXXRCYHCSA-N	COC1=C(O[C@@H]2O[C@H](CO)[C@@H](O)[C@H](O)[C@H]2O)C=CC(=C1)C(C)=O	37587.7	82446.9	19952.2	38415.3	21057.3	31134.2
NEG_4311	[M-H]-	Apigenin	0.165458	1.19725	0.263971	269.043	6.572	C01477	Phenylpropanoids and polyketides	Flavonoids	Flavones	C15H10O5	KZNIFHPLKGYRTM-UHFFFAOYSA-N	OC1=CC=C(C=C1)C2=CC(=O)C3=C(O2)C=C(O)C=C3O	19847.3	26046.8	24326.2	18156.6	24090.2	16404.4
NEG_17807	[M-H]-	Apigenin-6-C-arabinoside-8-C-glucoside	0.0340087	0.814958	0.224869	481.101	3.625		Lignans, neolignans and related compounds	Flavonolignans		C25H22O10	SEBFKMXJBCUCAI-WAABAYLZSA-N	COC1=CC(=CC=C1O)C2OC3=CC(=CC=C3OC2CO)C4OC5=C(C(=CC(=C5)O)O)C(=O)C4O	5670.83	5500.87	4139.46	7463.16	5245.83	6078.66
NEG_26922	[M-H]-	Apigenin-7-O-neohesperidoside	0.0889733	0.550725	0.31537	577.156	4.462					C27H30O14	RPMNUQRUHXIGHK-UHFFFAOYNA-N	O=C1C=C(OC2=CC(OC3OC(CO)C(O)C(O)C3OC4OC(C)C(O)C(O)C4O)=CC(O)=C12)C=5C=CC(O)=CC5	9242.8	3182.9	1520.82	4851.36	12809.1	7663.46
NEG_6877	[M-H]1-	Arachidonic acid	0.222073	0.420603	0.124534	311.296	12.177	C00219	Lipids and lipid-like molecules	Fatty Acyls	Fatty acids and conjugates	C20H32O2	YZXBAPSDXZZRGB-DOFZRALJSA-N	CCCCC\\C=C/C/C=C\\C\\C=C/C/C=C\\CCCC(O)=O	195.825	28631.1	24849.3	24422.3	51192.3	52002.8
NEG_4506	[M-H]-	Arbutin	0.0827624	0.399581	0.119956	271.079	3.085					C12H16O7	BJRNKVDFDLYUGJ-UHFFFAOYNA-N	OC1=CC=C(OC2OC(CO)C(O)C(O)C2O)C=C1	542.657	3337.48	2603.95	3649.3	4360.64	8217.27
NEG_10121	[M-H]-	Arctigenin	1.41667	35.4461	0.381858	371.147	6.47					C21H24O6	NQWVSMVXKMHKTF-UHFFFAOYNA-N	O=C1OCC(CC2=CC=C(OC)C(OC)=C2)C1CC3=CC=C(O)C(OC)=C3	1.95031e+06	8639.28	4527.08	9679.74	19859.4	25854.1
NEG_27092	[M-H]-	Arctiin	0.0276986	0.964393	0.929104	579.209	5.165		Lignans, neolignans and related compounds	Lignan glycosides		C27H34O11	XOJVHLIYNSOZOO-SWOBOCGESA-N	COC1=CC=C(CC2COC(=O)C2CC3=CC=C(OC4OC(CO)C(O)C(O)C4O)C(=C3)OC)C=C1OC	2898.23	1451.38	786.788	2216.5	1713.24	1396.3
NEG_22863	[M+FA-H]-	Asiatic acid	0.453954	0.622041	0.40842	533.346	10.096		Lipids and lipid-like molecules	Prenol lipids	Triterpenoids	C30H48O5	JXSVIVRDWWRQRT-UYDOISQJSA-N	C[C@@H]1CC[C@@]2(CC[C@]3(C)C(=CC[C@@H]4[C@@]5(C)C[C@@H](O)[C@H](O)[C@@](C)(CO)[C@@H]5CC[C@@]34C)[C@@H]2[C@H]1C)C(O)=O	8354.12	337069	127518	199824	330112	230370
NEG_50182	[M-H]-	Asiaticoside	0.0199847	0.766568	0.161702	957.518	12.364					C48H78O19	WYQVAPGDARQUBT-UHFFFAOYNA-N	O=C(OC1OC(COC2OC(CO)C(OC3OC(C)C(O)C(O)C3O)C(O)C2O)C(O)C(O)C1O)C45CCC(C)C(C)C5C6=CCC7C8(C)CC(O)C(O)C(C)(CO)C8CCC7(C)C6(C)CC4	3435.33	3429.2	2862.27	3293.37	5177.16	4218.24
NEG_573	[M-H]-	Asparagine	0.386896	0.421089	0.0954023	131.035	1.106	C00152	Organic acids and derivatives	Carboxylic acids and derivatives	Amino acids, peptides, and analogues	C4H8N2O3	DCXYFEDJOCDNAF-REOHCLBHSA-N	NC(CC(O)=N)C(O)=O	42.8063	82782	64783	80163.5	133714	136660
NEG_11913	[M-H]-	Astringin	0.204484	1.24137	0.730341	405.121	3.782	C10245	Phenylpropanoids and polyketides	Stilbenes	Stilbene glycosides	C20H22O9	PERPNFLGJXUDDW-CUYWLFDKSA-N	OC[C@H]1O[C@@H](OC2=CC(=CC(=C2)O)C=CC3=CC(=C(O)C=C3)O)[C@H](O)[C@@H](O)[C@@H]1O	91313.5	30651.8	18721.5	58084	28148.8	27099.2
NEG_25181	[M-H]-	Atorvastatin	0.0406184	0.586045	0.385008	557.241	3.927	C06834	Organoheterocyclic compounds	Pyrroles	Substituted pyrroles	C33H35FN2O5	XUKUURHRXDUEBC-KAYWLYCHSA-N	CC(C)C1=C(C(O)=NC2=CC=CC=C2)C(=C([N]1CC[C@@H](O)C[C@@H](O)CC(O)=O)C3=CC=C(F)C=C3)C4=CC=CC=C4	929.197	818.879	1949.32	3672.95	1714.77	921.336
NEG_18960	[M-H]-	Atractyloside A	0.230764	0.519931	0.104249	493.227	6.7					C21H36O10	QNBLVYVBWDIWDM-BSLJOXIBSA-N	C[C@@]1([C@@H]2C[C@@H](CC[C@@]([C@H]2CC1=O)(CO)O)C(C)(C)O[C@H]3[C@@H]([C@H]([C@@H]([C@H](O3)CO)O)O)O)O	9990.45	43894.5	26701.2	47574	64690.4	42729.5
NEG_4317	[M-H]-	Baicalein	0.069636	0.72233	0.280242	269.044	6.783	C10023	Phenylpropanoids and polyketides	Flavonoids	Flavones	C15H10O5	FXNFHKRTJBSTCS-UHFFFAOYSA-N	OC1=CC2=C(C(=O)C=C(O2)C3=CC=CC=C3)C(=C1O)O	10849.3	12968.7	5979.37	12296.8	18175	10780.1
NEG_8441	[M-H]-	Bavachalcone	0.091992	0.588645	0.470274	337.148	2.477					C20H20O4	BLZGPHNVMRXDCB-UXBLZVDNSA-N	CC(=CCC1=CC(=C(C=C1O)O)C(=O)/C=C/C2=CC=C(C=C2)O)C	3722.7	13640.6	1918.47	19204.8	4767.63	8783.77
NEG_18397	[M-H]-	Bayogenin	0.480176	0.497427	0.162115	487.338	9.895					C30H48O5	RWNHLTKFBKYDOJ-JEERONPWSA-N	C[C@@]12CC[C@@H]3[C@@]([C@H]1CC=C4[C@]2(CC[C@@]5([C@H]4CC(CC5)(C)C)C(=O)O)C)(C[C@@H]([C@@H]([C@@]3(C)CO)O)O)C	174765	101947	75541.9	111241	307742	289168
NEG_9548	[M-H]-	Benzoic acid + 1O, 2MeO, O-Hex	0.129436	2.08329	0.451453	359.095	1.962		Phenylpropanoids and polyketides	Tannins	Hydrolyzable tannins	C15H20O10	CIYLTHWUJCCASO-UHFFFAOYSA-N	COC1=CC(=CC(=C1O)OC)C(=O)OC2OC(CO)C(O)C(O)C2O	19862.3	3233.62	3419.93	4475.86	4300.43	3951.57
NEG_7091	[M-H]-	Benzoic acid + 2O, O-Hex	0.329368	3.75988	0.422885	315.069	1.866		Organic oxygen compounds	Organooxygen compounds	Carbohydrates and carbohydrate conjugates	C13H16O9	CBTFERBMQQAROP-UHFFFAOYSA-N	OCC1OC(OC2=CC=C(O)C(=C2)C(O)=O)C(O)C(O)C1O	122580	12262.4	5097.03	22655.9	9739.54	4823.68
NEG_8085	[M-C6H10O4-H]-	Benzophenone fragment, 2	0.233165	1.21472	0.79901	331.092	4.28		Benzenoids	Benzene and substituted derivatives	Benzophenones	C16H12O8	QPQRGIHXJVTGCW-UHFFFAOYSA-N	COC(=O)C1=CC(=C(C(=C1)O)C(=O)C2=C(C=CC=C2O)C(O)=O)O	106960	30692.1	8367.48	20697.6	43027.2	56483.9
NEG_931	[M-H]-	Benzoylformic acid	0.0943106	0.650058	0.411136	151.042	2.753	C02137	Benzenoids	Benzene and substituted derivatives	Benzoyl derivatives	C8H6O3	FAQJJMHZNSSFSM-UHFFFAOYSA-N	OC(=O)C(=O)C1=CC=CC=C1	650.548	15704.9	8960.81	17395.9	12252.3	9296.4
NEG_11679	[M-H]-	Benzyl alcohol + Hex-Pen	0.784351	0.589317	0.28197	401.144	3.843		Organic oxygen compounds	Organooxygen compounds	Carbohydrates and carbohydrate conjugates	C18H26O10	NJMQSVWMCODQIP-UHFFFAOYSA-N	OCC1(O)COC(OCC2OC(OCC3=CC=CC=C3)C(O)C(O)C2O)C1O	79015.1	849967	343533	636762	867122	655422
NEG_1716	[M-H]-	beta-D-Fructofuranose	0.312943	0.730243	0.331132	179.058	3.782	C02336	Organic oxygen compounds	Organooxygen compounds	Carbohydrates and carbohydrate conjugates	C6H12O6	RFSUNEUAIZKAJO-ARQDHWQXSA-N	OC[C@H]1O[C@](O)(CO)[C@@H](O)[C@@H]1O	232378	150897	89280	280314	189357	177449
NEG_15298	[M-H]-	Betulinic acid	1.13573	0.401782	0.226866	455.35	12.156		Lipids and lipid-like molecules	Prenol lipids	Triterpenoids	C30H48O3	QGJZLNKBHJESQX-FZFNOLFKSA-N	CC(=C)C1CCC2(CCC3(C)C(CCC4C5(C)CCC(O)C(C)(C)C5CCC34C)C12)C(O)=O	989146	19080.7	15077.8	554003	994790	998119
NEG_27513	[M-H]-	Biliverdin	0.379227	2.08618	0.175505	583.233	9.289		Organoheterocyclic compounds	Tetrapyrroles and derivatives	Bilirubins	C33H34N4O6	RCNSAJSGRJSBKK-NSQVQWHSSA-N	CC1=C(CCC(O)=O)C(NC1=CC2=NC(=O)C(=C2C)C=C)=CC3=C(CCC(O)=O)C(=C([NH]3)C=C4N=C(O)C(=C4C=C)C)C	100806	53504.7	41832.7	24777.8	17930.8	51311.7
NEG_15774	[M-H]-	Bioside	0.321076	1.37353	0.59802	461.163	4.461		Organic oxygen compounds	Organooxygen compounds	Carbohydrates and carbohydrate conjugates	C20H30O12	DORPKYRPJIIARM-GYAWPQPFSA-N	CC1OC(OC2C(O)C(CO)OC(OCCC3=CC=C(O)C(=C3)O)C2O)C(O)C(O)C1O	162898	48162.1	39743.7	57834.5	61249.8	63513.2
NEG_16763	[M-H]-	Biosone	4.94456	0.828902	0.823951	469.333	11.777	C02283	Lipids and lipid-like molecules	Prenol lipids	Triterpenoids	C30H46O4	MPDGHEJMBKOTSU-WFJWTYAKSA-N	CC1(C)[C@@H](O)CC[C@@]2(C)C1CC[C@]3(C)C2C(=O)C=C4C5C[C@](C)(CC[C@]5(C)CC[C@@]34C)C(O)=O	33745	6.08438e+07	1.13009e+07	1.03382e+07	3.65042e+07	4.02347e+07
NEG_3962	[M-H]-	Bromacil	0.251491	0.476709	0.138626	259.008	1.078		Organoheterocyclic compounds	Diazines	Pyrimidines and pyrimidine derivatives	C9H13BrN2O2	CTSLUCNDVMMDHG-UHFFFAOYSA-N	CCC(C)N1C(=O)NC(=C(Br)C1=O)C	24.4906	34281.1	50402.8	74883.9	51706.2	51104.2
NEG_13436	[M+FA-H]-	Bufalin	0.104217	1.13841	0.703608	431.228	6.935					C24H34O4	QEEBRPGZBVVINN-UHFFFAOYNA-N	O=C1OC=C(C=C1)C2CCC3(O)C4CCC5CC(O)CCC5(C)C4CCC23C	6372.55	17707.5	13362.9	13563.1	11550.6	7776.8
NEG_2106	[M-H]-	Butylparaben	0.16643	1.44468	0.803849	193.087	7.234		Benzenoids	Benzene and substituted derivatives	Benzoic acids and derivatives	C11H14O3	QFOHBWFCKVYLES-UHFFFAOYSA-N	CCCCOC(=O)C1=CC=C(O)C=C1	52779.7	730.124	1021.29	549.195	513.292	36683.7
NEG_1684	[M-H]-	Caffeic acid	0.521769	1.19124	0.780325	179.034	2.886	C01481	Phenylpropanoids and polyketides	Cinnamic acids and derivatives	Hydroxycinnamic acids and derivatives	C9H8O4	QAIPRVGONGVQAS-DUXPYHPUSA-N	OC(=O)C=CC1=CC=C(O)C(=C1)O	677504	299056	114759	412890	96708.1	406523
NEG_8607	[M-H]-	Caffeic acid hexoside	0.329229	0.767346	0.684446	341.088	2.991		Phenylpropanoids and polyketides	Cinnamic acids and derivatives	Hydroxycinnamic acids and derivatives	C15H18O9	WQSDYZZEIBAPIN-UHFFFAOYSA-N	OCC1OC(OC(=O)C=CC2=CC(=C(O)C=C2)O)C(O)C(O)C1O	254356	72822.3	43445.3	181608	57750.9	243634
NEG_5042	[M-H]-	Caffeic acid phenethyl ester	0.374233	0.52932	0.179683	283.099	7.437		Phenylpropanoids and polyketides	Cinnamic acids and derivatives	Hydroxycinnamic acids and derivatives	C17H16O4	SWUARLUWKZWEBQ-VQHVLOKHSA-N	OC1=C(O)C=C(\\C=C\\C(=O)OCCC2=CC=CC=C2)C=C1	4419.59	133114	163851	139192	213688	216500
NEG_2714	[M-H]-	Calcium pantothenate	0.117737	1.99586	0.593163	218.102	1.911					C9H17NO5.1/2 Ca	FAPWYRCQGJNNSJ-UBKPKTQASA-L	CC(C)(CO)[C@H](C(=O)NCCC(=O)[O-])O.CC(C)(CO)[C@H](C(=O)NCCC(=O)[O-])O.[Ca+2]	7.57667	17254	4764.43	2.23232	11021.5	12.0891
NEG_4480	[M-H]-	Canarione	0.317311	0.506759	0.195795	271.019	5.212		Organoheterocyclic compounds	Naphthopyrans	Naphthopyranones	C14H8O6	NPUXQAACUNUHIX-UHFFFAOYSA-N	CC1=CC(=O)C2=C(O1)C=C3C(=O)C(=O)C=C(O)C3=C2O	2071.67	92869.6	63715.7	65436.2	128079	119566
NEG_8545	[M-H]-	Canrenone	1.68998	53.8939	0.371447	339.199	10.734		Lipids and lipid-like molecules	Steroids and steroid derivatives	Steroid lactones	C22H28O3	UJVLDDZCTMKXJK-AFDHUMPMSA-N	CC12CCC(=O)C=C1C=CC3[C@@H]2CCC4(C)[C@H]3CCC45CCC(=O)O5	2.72468e+06	22758.4	21830.9	17103.8	13076.7	21203.2
NEG_4356	[M-H]-	Cardamonin	1.15674	268.551	0.344975	269.082	7.518		Phenylpropanoids and polyketides	Linear 1,3-diarylpropanoids	Chalcones and dihydrochalcones	C16H14O4	NYSZJNUIVUBQMM-BQYQJAHWSA-N	COC1=C(C(=CC(=C1)O)O)C(=O)\\C=C\\C2=CC=CC=C2	1.2171e+06	31464	26972.6	2590.63	864.713	1294.35
NEG_5494	[M-H]-	Catechin hydrate	4.4757	0.275476	0.116466	289.072	3.623		Phenylpropanoids and polyketides	Flavonoids	Flavans	C15H14O6.H2O	OFUMQWOJBVNKLR-NQQJLSKUSA-N	O.O[C@H]1CC2=C(O[C@@H]1C3=CC(=C(O)C=C3)O)C=C(O)C=C2O	6786.64	6.02065e+06	3.1639e+06	7.05115e+06	1.83868e+07	7.92733e+06
NEG_223	[M-H]-	Catechol	0.159502	0.620754	0.628218	109.029	1.617	C15571	Benzenoids	Phenols	Benzenediols	C6H6O2	YCIMNLLNPGFGHC-UHFFFAOYSA-N	OC1=C(O)C=CC=C1	562.186	62701.5	3866.76	67374	11071.1	29698.3
NEG_18602	[M-H]-	Caudatin	1.61762	0.48465	0.133581	489.299	11.616					C28H42O7	VWLXIXALPNYWFH-UHFFFAOYSA-N	CC(C)C(=CC(=O)OC1CC2C3(CCC(CC3=CCC2(C4(C1(C(CC4)(C(=O)C)O)C)O)O)O)C)C	64909.7	1.85752e+06	1.30464e+06	2.81834e+06	1.95493e+06	1.88529e+06
NEG_41821	[M-H]-	Chikusetsu saponin IVa	0.145986	1.10488	0.868166	793.451	11.599					C42H66O14	YOSRLTNUOCHBEA-UHFFFAOYSA-N	CC1(CCC2(CCC3(C(=CCC4C3(CCC5C4(CCC(C5(C)C)OC6C(C(C(C(O6)C(=O)O)O)O)O)C)C)C2C1)C)C(=O)OC7C(C(C(C(O7)CO)O)O)O)C	25272.1	47768.4	20109.6	18234	56343.9	9730.21
NEG_3710	[M-H]-	Chrysin	0.992959	0.37357	0.0388115	253.052	7.582	C10028	Phenylpropanoids and polyketides	Flavonoids	Flavones	C15H10O4	RTIXKCRFFJGDFG-UHFFFAOYSA-N	OC1=CC2=C(C(=C1)O)C(=O)C=C(O2)C3=CC=CC=C3	2492.25	389497	260772	504552	609937	632872
NEG_5495	[M-H]-	Cianidanol	3.21686	28.4875	0.383698	289.075	3.744	C06562	Phenylpropanoids and polyketides	Flavonoids	Flavans	C15H14O6	PFTAWBLQPZVEMU-DZGCQCFKSA-N	OC1CC2=C(O)C=C(O)C=C2OC1C3=CC(=C(O)C=C3)O	1.01007e+07	52962.3	34453.4	91486.5	179464	86684.1
NEG_877	[M-H]-	Cinnamic acid	0.282683	0.309758	0.068388	147.044	5.642	C10438	Phenylpropanoids and polyketides	Cinnamic acids and derivatives	Cinnamic acids	C9H8O2	WBYWAXJHAXSJNI-VOTSOKGWSA-N	OC(=O)C=CC1=CC=CC=C1	438.835	25030.3	16848.8	24689.1	56067.9	55859.3
NEG_1488	[M-H]-	cis-Aconitic acid	1.42954	0.524327	0.174332	173.008	1.15	C00417	Organic acids and derivatives	Carboxylic acids and derivatives	Tricarboxylic acids and derivatives	C6H6O6	GTZCVFVGUGFEME-IWQZZHSRSA-N	OC(=O)CC(=CC(O)=O)C(O)=O	27.632	1.65169e+06	2.64603e+06	2.43525e+06	2.97694e+06	2.7845e+06
NEG_10961	[M-H]-	cis-Piceid	0.256433	12.3272	0.38732	389.121	5.298		Phenylpropanoids and polyketides	Stilbenes	Stilbene glycosides	C20H22O8	HSTZMXCBWJGKHG-BUFXCDORSA-N	OCC1OC(OC2=CC(=CC(=C2)C=CC3=CC=C(O)C=C3)O)C(O)C(O)C1O	65103.8	1787.45	569.351	822.594	2786.41	1863.48
NEG_13716	[M-H]-	Coatlin A	0.993202	0.579962	0.23828	435.128	4.878		Phenylpropanoids and polyketides	Linear 1,3-diarylpropanoids	Chalcones and dihydrochalcones	C21H24O10	CSATWRZOLKGPRW-KXIDKYMXSA-N	OCC1OC(C(O)C(O)C1O)C2=C(O)C(=CC=C2O)C(=O)C(O)CC3=CC=C(O)C=C3	115.596	1.0105e+06	1.14956e+06	1.42431e+06	1.23207e+06	1.06832e+06
NEG_16949	[M-H]-	Colosolic acid	0.26698	0.512964	0.383147	471.346	9.574		Lipids and lipid-like molecules	Prenol lipids	Triterpenoids	C30H48O4	HFGSQOYIOKBQOW-UHFFFAOYSA-N	CC1CCC2(CCC3(C)C(=CCC4C5(C)CC(O)C(O)C(C)(C)C5CCC34C)C2C1C)C(O)=O	763.625	76989.5	15458	29116.2	94958.2	57636.4
NEG_31472	[M-H]-	Corilagin	0.200757	0.544756	0.180921	633.069	2.373	C10219	Phenylpropanoids and polyketides	Tannins	Hydrolyzable tannins		TUSDEZXZIZRFGC-XIGLUPEJSA-N	O[C@@H]1[C@H]2COC(=O)C3=CC(=C(O)C(=C3C4=C(O)C(=C(O)C=C4C(=O)O[C@@H]1[C@@H](O)[C@@H](O2)OC(=O)C5=CC(=C(O)C(=C5)O)O)O)O)O	20450.9	32610.8	12820.5	47972.1	20919.8	52046.9
NEG_6102	[M-H]1-	Coronaric acid	0.46762	0.240713	0.0144056	299.26	10.436	C14825	Lipids and lipid-like molecules	Fatty Acyls	Fatty acids and conjugates	C18H32O3	FBUKMFOXMZRGRB-YFHOEESVSA-N	CCCCC\\C=C/CC1OC1CCCCCCCC(O)=O	127.551	35575.3	35026.9	72627.3	101886	119322
NEG_16959	[M-H]-	Corosolic acid	2.85352	0.597818	0.344857	471.348	10.434					C30H48O4	HFGSQOYIOKBQOW-UHFFFAOYNA-N	O=C(O)C12CCC(C)C(C)C2C3=CCC4C5(C)CC(O)C(O)C(C)(C)C5CCC4(C)C3(C)CC1	597618	1.17774e+07	5.65737e+06	6.15607e+06	1.23227e+07	1.16849e+07
NEG_13351	[M-H]-	Cosmosiin	0.110363	0.601245	0.0657531	431.098	5.908	C04608	Phenylpropanoids and polyketides	Flavonoids	Flavonoid glycosides	C21H20O10	KMOUJOKENFFTPU-QNDFHXLGSA-N	OC[C@H]1O[C@@H](OC2=CC(=C3C(=O)C=C(OC3=C2)C4=CC=C(O)C=C4)O)[C@H](O)[C@@H](O)[C@@H]1O	9107.14	8617.14	11339.2	20866.3	13002	14470.6
NEG_7658	[M-H]-	Coumaroyl Hexoside	1.11468	3.14088	0.238955	325.09	2.551		Phenylpropanoids and polyketides	Cinnamic acids and derivatives	Hydroxycinnamic acids and derivatives	C15H18O8	DSNCQKUYZOSARM-UHFFFAOYSA-N	OCC1OC(OC(=O)C=CC2=CC=C(O)C=C2)C(O)C(O)C1O	59234.2	802942	495841	64300	254385	113684
NEG_8411	[M-H]-	Coumaroyl quinic acid	0.144503	0.200187	0.141953	337.091	2.802		Organic oxygen compounds	Organooxygen compounds	Alcohols and polyols	C16H18O8	XWRHBGVVCOSNKO-UHFFFAOYSA-N	OC1CC(O)(CC(O)C1OC(=O)C=CC2=CC=C(O)C=C2)C(O)=O	585.872	2490.8	4161.14	13099	20450.7	2605.5
NEG_16966	[M-H]-	Crategolic acid	0.349826	1.1192	0.61447	471.362	11.63		Lipids and lipid-like molecules	Prenol lipids	Triterpenoids	C30H48O4	MDZKJHQSJHYOHJ-UHFFFAOYSA-N	CC1(C)CCC2(CCC3(C)C(=CCC4C5(C)CC(O)C(O)C(C)(C)C5CCC34C)C2C1)C(O)=O	210009	159267	105687	141177	153684	129516
NEG_47157	[M-H]-	Cy 3-coumSamb-5-Glc	0.0419239	0.621232	0.231086	887.48	9.702		Phenylpropanoids and polyketides	Flavonoids	Flavonoid glycosides	C41H45O22	JSYDBTWJIIAZPU-NEVABJEQSA-O	OCC1OC(OC2=CC(=CC3=[O+]C(=C(OC4OC(COC(=O)C=CC5=CC=C(O)C=C5)C(O)C(O)C4OC6OCC(O)C(O)C6O)C=C23)C7=CC(=C(O)C=C7)O)O)C(O)C(O)C1O	1037.6	2078.13	1322.04	3123.47	1286.61	2733.43
NEG_5191	[M-2H]-	Cyanidin	0.0686635	0.999033	0.998218	285.038	9.527		Phenylpropanoids and polyketides	Flavonoids	Hydroxyflavonoids	C15H11O6	VEVZSMAEJFVWIL-UHFFFAOYSA-O	OC1=CC(=C2C=C(O)C(=[O+]C2=C1)C3=CC(=C(O)C=C3)O)O	1644.13	7119.16	7290.75	7489.75	5011.81	3568.02
NEG_39013	[M-2H]-	Cyanidin 3-(2G-glucosylrutinoside)	0.290585	1.45707	0.396069	755.206	5.04					C33H41O20	MSUVUDCULKNUJL-UHFFFAOYNA-O	OC=1C=C(O)C=2C=C(OC3OC(COC4OC(C)C(O)C(O)C4O)C(O)C(O)C3OC5OC(CO)C(O)C(O)C5O)C(=[O+]C2C1)C=6C=CC(O)=C(O)C6	132692	109677	35635	81041.1	58172.3	51583.4
NEG_13352	[M-2H]-	Cyanidin-3-o-rhamnoside	0.939124	17.9791	0.389108	431.099	5.779		Phenylpropanoids and polyketides	Flavonoids	Flavonoid glycosides	[C21H21O10]+	USWXMMRFOWNEOR-VWLKIGRWSA-O	CC1OC(OC2=CC3=C(O)C=C(O)C=C3[O+]=C2C4=CC(=C(O)C=C4)O)C(O)C(O)C1O	872825	7685.22	5050.88	18061.8	13742.6	17450.5
NEG_611	[M-H]-	Cyclic AMP	0.196677	0.868938	0.777854	134.046	1.282	C00575	Nucleosides, nucleotides, and analogues	Purine nucleotides	Cyclic purine nucleotides	C10H12N5O6P	IVOMOUWHDPKRLL-KQYNXXCUSA-N	NC1=NC=NC2=C1N=C[N]2C3OC4CO[P](O)(=O)OC4C3O	1330.61	73648.4	55472.4	48864.2	51431.7	49831.5
NEG_10041	[M-H]-	Cylindrol B	0.295896	0.163485	0.071343	369.206	9.165		Organic oxygen compounds	Organooxygen compounds	Carbonyl compounds	C23H30O4	AQCKKGIVKOHRLM-HBFAXEOFSA-N	CC1CCC(=O)C(C)C1(C)C=CC(C)=CCC2=C(O)C=C(C)C(=C2O)C=O	1168.74	10158.7	8397.75	17219.7	39398.2	64036.8
NEG_10218	[M-H]-	Cyproterone	0.844503	3.38423	0.371996	373.163	7.391		Lipids and lipid-like molecules	Steroids and steroid derivatives	Pregnane steroids	C22H27ClO3	DUSHUSLJJMDGTE-ZJPMUUANSA-N	CC(=O)[C@@]1(O)CC[C@H]2[C@@H]3C=C(Cl)C4=CC(=O)[C@@H]5C[C@@H]5[C@]4(C)[C@H]3CC[C@]12C	728286	99710.7	84637.3	127356	46800.8	95516.1
NEG_3708	[M-H]-	Daidzein	0.1683	4.79319	0.222111	253.051	5.737	C10208	Phenylpropanoids and polyketides	Isoflavonoids	Isoflav-2-enes	C15H10O4	ZQSIJRDFPHDXIC-UHFFFAOYSA-N	OC1=CC=C(C=C1)C2=COC3=CC(=CC=C3C2=O)O	14330.4	29165.8	1200.11	1441.75	2515.43	5367.76
NEG_1630	[M-H]-	Daphnetin	0.470106	0.482359	0.153409	177.017	4.845	C03093	Phenylpropanoids and polyketides	Coumarins and derivatives	Hydroxycoumarins	C9H6O4	ATEFPOUAMCWAQS-UHFFFAOYSA-N	OC1=C(O)C2=C(C=CC(=O)O2)C=C1	0	167529	117941	184688	152703	254429
NEG_31852	[M-H]-	Decahydrogambogic acid	0.256274	1.24425	0.680247	637.367	10.892		Organoheterocyclic compounds	Benzopyrans	1-benzopyrans	C38H54O8	ZZGVJHSBRGZEML-UHFFFAOYSA-N	CC(C)CCCC1(C)OC2=C(C=C1)C(=C3C(=O)C4CC5CC6C(C)(C)OC(CCC(C)C(O)=O)(C5O)C46OC3=C2CCC(C)C)O	12989.2	98993.8	61456.4	51245.5	53400.6	34746.3
NEG_6093	[M-H]-	Dehydroabietic acid	0.230105	0.514818	0.175569	299.204	10.742		Lipids and lipid-like molecules	Prenol lipids	Diterpenoids		NFWKVWVWBFBAOV-UHFFFAOYSA-N	CC(C)C1=CC2=C(C=C1)C3(C)CCCC(C)(C3CC2)C(O)=O	0	48687.7	42658.8	43156.2	62881.6	71396.8
NEG_9908	[M-H]-	Dehydroepiandrosterone sulfate	0.0818544	0.586363	0.36495	367.154	9.625	C04555	Lipids and lipid-like molecules	Steroids and steroid derivatives	Sulfated steroids	C19H28O5S	CZWCKYRVOZZJNM-USOAJAOKSA-N	CC12CCC3C(CC=C4CC(CCC34C)O[S](O)(=O)=O)C1CCC2=O	44.4447	9934.69	3743.47	7487.87	10174.5	5740.56
NEG_15169	[M-H]-	Dehydrotrametenolic acid	1.03131	20.1609	0.383505	453.338	12.207					C30H46O3	QFPLAAZRZNKRRY-UHFFFAOYSA-N	CC(=CCCC(C1CCC2(C1(CC=C3C2=CCC4C3(CCC(C4(C)C)O)C)C)C)C(=O)O)C	1.03732e+06	11551.3	8449.96	4006.55	32138.1	16299.5
NEG_18080	[M-H]-	Dehydrotumulosic acid	0.417678	0.285436	0.0546537	483.343	11.222					C31H48O4	LADJWZMBZBVBSB-DWSVKRSBSA-N	CC(C)C(=C)CC[C@H]([C@H]1[C@@H](C[C@@]2([C@@]1(CC=C3C2=CCC4[C@@]3(CC[C@@H](C4(C)C)O)C)C)C)O)C(=O)O	1585.74	41249.1	43606	54865.8	126645	121327
NEG_12372	[M-H]-	delta(4)-Dafachronic acid	0.570972	125.347	0.37509	413.302	11.509		Lipids and lipid-like molecules	Steroids and steroid derivatives	Bile acids, alcohols and derivatives	C27H42O3	PSXQJZDFWDKBIP-NNWQCNCGSA-N	C[C@H](CCCC(C)C(O)=O)[C@H]1CC[C@H]2[C@@H]3CCC4=CC(=O)CC[C@]4(C)[C@H]3CC[C@]12C	312320	484.19	608.426	474.369	962.963	1063.04
NEG_3966	[M-H]-	Demethylbellidifolin	0.0729915	0.560139	0.662958	259.024	5.482		Organoheterocyclic compounds	Benzopyrans	1-benzopyrans	C13H8O6	MPXAWSABMVLIBU-UHFFFAOYSA-N	OC1=CC(=C2C(=O)C3=C(O)C=CC(=C3OC2=C1)O)O	15319.8	3491.29	1173.81	1058.58	2265.31	32354.6
NEG_19882	[M+HCOO]-	Deoxynivalenol 3-glucoside	0.0337983	1.75077	0.566379	503.172	3.195		Lipids and lipid-like molecules	Prenol lipids	Sesquiterpenoids	C21H30O11	PUMXWMGECQIOGB-SMSDQXDJSA-N	CC1=C[C@H]2O[C@@H]3[C@@H](C[C@@](C)([C@]34CO4)[C@@]2(CO)[C@H](O)C1=O)O[C@@H]5O[C@H](CO)[C@@H](O)[C@H](O)[C@H]5O	1730.98	320.885	166.437	610.433	261.376	395.237
NEG_29784	[M-H]-	Dihydrohesperetin-7-O-neohesperidoside	0.41258	0.397202	0.0401089	611.194	6.75					C28H36O15	ITVGXXMINPYUHD-UHFFFAOYNA-N	O=C(C1=C(O)C=C(OC2OC(CO)C(O)C(O)C2OC3OC(C)C(O)C(O)C3O)C=C1O)CCC4=CC=C(OC)C(O)=C4	4722.37	72916.5	45114.4	101975	92935.1	114135
NEG_7379	[M-H]-	Dihydromyricetin	0.504098	2.38643	0.504228	319.043	3.598		Phenylpropanoids and polyketides	Flavonoids	Flavans	C15H12O8	KJXSIXMJHKAJOD-LSDHHAIUSA-N	O[C@@H]1[C@H](OC2=CC(=CC(=C2C1=O)O)O)C3=CC(=C(O)C(=C3)O)O	318312	22171.1	29001.5	53760.9	54093.3	46973.2
NEG_6381	[M-H]-	Dihydroquercetin	0.976917	0.446853	0.0827422	303.051	4.306		Phenylpropanoids and polyketides	Flavonoids	Flavans	C15H12O7	CXQWRCVTCMQVQX-UHFFFAOYSA-N	OC1C(OC2=CC(=CC(=C2C1=O)O)O)C3=CC(=C(O)C=C3)O	5529.99	566958	367981	776120	670807	657721
NEG_9504	[M-H]1-	Dinoprost	0.0535889	3.83442	0.154218	357.262	7.954		Lipids and lipid-like molecules	Fatty Acyls	Eicosanoids	C20H34O5	PXGPLTODNUVGFL-YNNPMVKQSA-N	CCCCC[C@H](O)\\C=C\\[C@H]1[C@H](O)C[C@H](O)[C@@H]1C\\C=C/CCCC(O)=O	488.641	2000.16	818.08	224.698	207.508	430.214
NEG_37085	[M-H]-	Dipalmitoylphosphatidylglycerol	1.59225	2.42018	0.332597	721.497	12.879		Lipids and lipid-like molecules	Glycerophospholipids	Glycerophosphoglycerols	C38H75O10P	BIABMEZBCHDPBV-UHFFFAOYSA-N	CCCCCCCCCCCCCCCC(=O)OCC(CO[P](O)(=O)OCC(O)CO)OC(=O)CCCCCCCCCCCCCCC	7504.04	1.12729e+06	1.66968e+06	245728	561798	351262
NEG_8563	[M-H]-	Docosanoic acid	0.197682	1.75365	0.458433	339.326	13.221	C08281	Lipids and lipid-like molecules	Fatty Acyls	Fatty acids and conjugates	C22H44O2	UKMSUNONTOPOIO-UHFFFAOYSA-N	CCCCCCCCCCCCCCCCCCCCCC(O)=O	498.332	22542.1	30292.5	6551.49	15401.8	8459.15
NEG_7701	[M-H]-	Dodecylbenzenesulfonic acid	1.55552	26.1577	0.374893	325.181	10.368		Benzenoids	Benzene and substituted derivatives	Benzenesulfonic acids and derivatives	C18H30O3S	KWXICGTUELOLSQ-UHFFFAOYSA-N	CCCCCCCCCCCCC1=CC=C(C=C1)[S](O)(=O)=O	2.32624e+06	25281.1	32016.8	29208.1	17505.2	44408.6
NEG_964	[M-H]-	Dopamine	0.0105872	0.891763	0.820139	152.07	1.555	C03758	Benzenoids	Phenols	Benzenediols	C8H11NO2	VYFYYTLLBUKUHU-UHFFFAOYSA-N	NCCC1=CC=C(O)C(=C1)O	323.646	303.768	474.504	211.988	761.833	261.842
NEG_4108	[M-H]-	Dormin	0.999824	16.4109	0.385462	263.128	5.807		Lipids and lipid-like molecules	Prenol lipids	Sesquiterpenoids	C15H20O4	JLIDBLDQVAYHNE-LXGGSRJLSA-N	CC(C=CC1(O)C(=CC(=O)CC1(C)C)C)=CC(O)=O	985797	18005.2	5799.35	18568.8	19247.7	23703.7
NEG_25046	[M-H]-	Dronedarone	0.0477661	1.09414	0.801846	555.289	6.368		Organic oxygen compounds	Organooxygen compounds	Carbonyl compounds	C31H44N2O5S	ZQTNQVWKHCQYLQ-UHFFFAOYSA-N	CCCCN(CCCC)CCCOC1=CC=C(C=C1)C(=O)C2=C(CCCC)OC3=C2C=C(N[S](C)(=O)=O)C=C3	4690.14	2907.92	1702.81	2021.96	3703.98	2774.7
NEG_16960	[M-H]-	Echinocystic acid	3.39485	7.83556	0.390341	471.349	10.549		Lipids and lipid-like molecules	Prenol lipids	Triterpenoids		YKOPWPOFWMYZJZ-PRIAQAIDSA-N	CC1(C)CC[C@@]2([C@H](O)C[C@]3(C)C(=CC[C@@H]4[C@@]5(C)CC[C@H](O)C(C)(C)[C@@H]5CC[C@@]34C)[C@@H]2C1)C(O)=O	1.15464e+07	543532	233545	225613	614186	732963
NEG_31573	[M-H]-	Echinocystic acid-3-O-glucoside	0.712807	0.89712	0.773516	633.386	10.265					C36H58O9	WYDPEADEZMZKNM-UHFFFAOYNA-N	O=C(O)C12CCC(C)(C)CC2C3=CCC4C5(C)CCC(OC6OC(CO)C(O)C(O)C6O)C(C)(C)C5CCC4(C)C3(C)CC1O	274305	785777	955098	696272	529909	1.0201e+06
NEG_41356	[M+FA-H]-	Eleutheroside E	0.10549	0.536689	0.197535	787.272	4.341					C34H46O18	FFDULTAFAQRACT-UHFFFAOYNA-N	COC1=CC(=CC(=C1O[C@H]2[C@@H]([C@H]([C@@H]([C@H](O2)CO)O)O)O)OC)[C@H]3[C@@H]4CO[C@@H]([C@H]4CO3)C5=CC(=C(C(=C5)OC)O[C@H]6[C@@H]([C@H]([C@@H]([C@H](O6)CO)O)O)O)OC	417.667	11530.7	7008.23	12173.6	14045.5	9102.33
NEG_6163	[M-H]-	Ellagic acid	0.714497	2.48003	0.332513	300.995	4.961	C10788	Phenylpropanoids and polyketides	Tannins	Hydrolyzable tannins	C14H6O8	AFSDNFLWKVMVRB-UHFFFAOYSA-N	OC1=CC2=C3C(=C1O)OC(=O)C4=CC(=C(O)C(=C34)OC2=O)O	482775	133147	89503.2	55972.8	147293	81177.1
NEG_5672	[M-H]-	Embelin	0.293011	0.404568	0.0436728	293.178	9.132		Organic oxygen compounds	Organooxygen compounds	Carbonyl compounds	C17H26O4	IRSFLDGTOHBADP-UHFFFAOYSA-N	CCCCCCCCCCCC1=C(O)C(=O)C=C(O)C1=O	4429.91	35642.4	39225.3	56800.2	80335.2	58870.4
NEG_4314	[M-H]-	Emodin	0.295663	49.2257	0.360738	269.043	9.355	C10343	Benzenoids	Anthracenes	Anthraquinones	C15H10O5	RHMXXJGYXNZAPX-UHFFFAOYSA-N	CC1=CC2=C(C(=C1)O)C(=O)C3=C(C=C(O)C=C3O)C2=O	82450.7	2623.98	238.047	88.6262	251.304	1393.16
NEG_16752	[M-H]-	Enoxolone	0.359106	1.024	0.960669	469.326	11.204		Lipids and lipid-like molecules	Prenol lipids	Triterpenoids	C30H46O4	MPDGHEJMBKOTSU-YKLVYJNSSA-N	CC1(C)[C@@H](O)CC[C@@]2(C)[C@H]1CC[C@]3(C)[C@@H]2C(=O)C=C4[C@@H]5C[C@](C)(CC[C@]5(C)CC[C@@]34C)C(O)=O	269556	233214	96779.4	51264	258520	275715
NEG_6292	[M-H]-	Enterodiol	0.195757	0.666525	0.265974	301.143	6.615					C18H22O4	DWONJCNDULPHLV-UHFFFAOYNA-N	OC1=CC=CC(=C1)CC(CO)C(CO)CC=2C=CC=C(O)C2	62581.5	37967.8	28967.2	68821.1	39867.4	85627.6
NEG_5868	[M-H]-	Enterolactone	0.598593	0.271175	0.106243	297.112	8.424					C18H18O4	HVDGDHBAMCBBLR-UHFFFAOYNA-N	O=C1OCC(CC=2C=CC=C(O)C2)C1CC=3C=CC=C(O)C3	22082.7	88730.2	55693.1	116446	156543	341027
NEG_6491	[M-H]-	Epigallocatechin	1.79714	2.62216	0.508006	305.05	2.738	C12136	Phenylpropanoids and polyketides	Flavonoids	Flavans	C15H14O7	XMOCLSLCDHWDHP-IUODEOHRSA-N	OC1CC2=C(OC1C3=CC(=C(O)C(=C3)O)O)C=C(O)C=C2O	8894.88	578674	2.9982e+06	6722.74	1.34451e+06	16258.2
NEG_24488	[M-H]-	Epitheaflagallin 3-O-gallate	0.211786	0.60404	0.422583	551.08	5.334					C27H20O13	CMGRMMSVGCHWOK-UHFFFAOYSA-N	C1C(C(OC2=CC(=CC(=C21)O)O)C3=CC(=O)C(=C4C(=C3)C=C(C(=C4O)O)O)O)OC(=O)C5=CC(=C(C(=C5)O)O)O	473.796	78161.9	32656.2	62868.6	34190.4	87187.1
NEG_5376	[M-H]-	Eriodictyol	0.533468	1.8145	0.633026	287.056	5.607	C05631	Phenylpropanoids and polyketides	Flavonoids	Flavans	C15H12O6	SBHXYTNGIZCORC-ZDUSSCGKSA-N	OC1=CC2=C(C(=O)C[C@H](O2)C3=CC(=C(O)C=C3)O)C(=C1)O	429486	34105.3	11828	58359.2	67727.4	135924
NEG_14764	[M-H]-	Eriodictyol-7-O-glucoside	0.25291	0.653534	0.074045	449.114	4.385		Phenylpropanoids and polyketides	Flavonoids	Flavonoid glycosides	C21H22O11	RAFHNDRXYHOLSH-SFTVRKLSSA-N	OCC1OC(OC2=CC3=C(C(=O)CC(O3)C4=CC(=C(O)C=C4)O)C(=C2)O)C(O)C(O)C1O	81049	52182.6	38456.6	85249.4	87624.8	89833.2
NEG_37780	[2M-H]-	Erythromycin	0.304336	2.2867	0.474428	734.471	12.721	C01912	Organic oxygen compounds	Organooxygen compounds	Carbohydrates and carbohydrate conjugates	C37H67NO13	ULGZDMOVFRHVEP-RWJQBGPGSA-N	CC[C@H]1OC(=O)[C@H](C)[C@@H](O[C@H]2C[C@@](C)(OC)[C@@H](O)[C@H](C)O2)[C@H](C)[C@@H](O[C@@H]3O[C@H](C)C[C@@H]([C@H]3O)N(C)C)[C@](C)(O)C[C@@H](C)C(=O)[C@H](C)[C@@H](O)[C@]1(C)O	115458	15482.1	12255.3	27274.2	20110.6	15236.1
NEG_1634	[M-H]-	Esculetin	0.571635	5.54765	0.384553	177.019	3.572	C09263	Phenylpropanoids and polyketides	Coumarins and derivatives	Hydroxycoumarins	C9H6O4	ILEDWLMCKZNDJK-UHFFFAOYSA-N	OC1=CC2=C(C=CC(=O)O2)C=C1O	327058	20548	18586.2	20122.9	16269.3	29616.3
NEG_8497	[M-H]-	Esculin	0.169888	7.43145	0.406233	339.067	3.636		Phenylpropanoids and polyketides	Coumarins and derivatives	Coumarin glycosides	C15H16O9	XHCADAYNFIFUHF-TVKJYDDYSA-N	OCC1OC(OC2=C(O)C=C3OC(=O)C=CC3=C2)C(O)C(O)C1O	29922.8	1200.97	205.013	1174.96	1741.18	1299.57
NEG_18398	[M-H]-	Euscaphic acid	0.250462	0.882047	0.846884	487.339	11.26		Lipids and lipid-like molecules	Prenol lipids	Triterpenoids		OXVUXGFZHDKYLS-QUFHAEKXSA-N	C[C@@H]1CC[C@@]2(CC[C@]3(C)C(=CC[C@@H]4[C@@]5(C)C[C@@H](O)[C@@H](O)C(C)(C)[C@@H]5CC[C@@]34C)[C@@H]2[C@]1(C)O)C(O)=O	49551.8	163096	26375.2	33199.8	133971	103816
NEG_8011	[M-H]-	FA 18:1;3O	1.1355	3.25444	0.487897	329.233	7.558		Lipids and lipid-like molecules	Fatty Acyls	Fatty acids and conjugates	C18H34O5	LGADJSRSYLFTSG-UHFFFAOYSA-N	O=C(O)CCCC(O)CCC(O)C=CCC(O)CCCCCC	1.54269e+06	71990.3	39118.3	120572	84575.3	303018
NEG_5772	[M-H]-	FA 18:2;O	0.355121	0.711047	0.442047	295.227	10.506		Lipids and lipid-like molecules	Fatty Acyls	Fatty acids and conjugates	C18H32O3	UKRXAPMQXXXXTD-UHFFFAOYSA-N	O=C(O)CCCCCCC(O)C=CCC=CCCCCC	45104.6	285821	186598	233037	172632	322165
NEG_5932	[M-H]-	FA 19:0	0.174375	23.8292	0.363544	297.281	12.395		Lipids and lipid-like molecules	Fatty Acyls	Fatty acids and conjugates	C19H38O2	ISYWECDDZWTKFF-UHFFFAOYSA-N	O=C(O)CCCCCCCCCCCCCCCCCC	28692.8	638.368	659.44	397.343	674.144	187.08
NEG_7845	[M-H]-	FA 20:0;2O	0.719222	0.837676	0.736005	327.288	11.816		Lipids and lipid-like molecules	Fatty Acyls	Fatty acids and conjugates	C20H40O3	CPLYLXYEVLGWFJ-UHFFFAOYSA-N	O=C(O)C(O)CCCCCCCCCCCCCCCCCC	628.718	947902	739388	501871	815598	697533
NEG_6780	[M-H]-	FA 20:1	0.580283	27.4506	0.375579	309.279	12.26		Lipids and lipid-like molecules	Fatty Acyls	Fatty acids and conjugates	C20H38O2	BITHHVVYSMSWAG-UHFFFAOYSA-N	O=C(O)CCCCCCCCCC=CCCCCCCCC	324119	4548.99	2688.28	1215.04	4530.93	6325.02
NEG_6684	[M-H]-	FA 20:2	0.214723	0.498794	0.275746	307.265	11.859		Lipids and lipid-like molecules	Fatty Acyls	Fatty acids and conjugates	C20H36O2	XSXIVVZCUAHUJO-UHFFFAOYSA-N	O=C(O)CCCCCCCCCC=CCC=CCCCCC	297.389	48647.3	37062.8	33954.7	46594.9	91881.4
NEG_10055	[M-H]-	FA 22:1;2O	0.549435	82.9587	0.368684	369.301	11.53		Lipids and lipid-like molecules	Fatty Acyls	Fatty acids and conjugates	C22H42O4	UBHSEJBILMDXFU-UHFFFAOYSA-N	O=C(O)CCCCCCCC(O)CCCC=CCCCCC(O)CCC	287065	3455.14	1214.57	1446.97	888.729	1180.92
NEG_10060	[M-H]-	FA 23:0;2O	0.548236	10.0925	0.38723	369.334	12.448		Lipids and lipid-like molecules	Fatty Acyls	Fatty acids and conjugates	C23H46O3	JZWLIRVAYJRWLN-UHFFFAOYSA-N	O=C(O)C(O)CCCCCCCCCCCCCCCCCCCCC	296508	7613.55	7216.72	4752.5	17956.2	8139.77
NEG_10718	[M-H]-	FA 24:0;2O	0.982264	0.817595	0.811499	383.35	12.478		Lipids and lipid-like molecules	Fatty Acyls	Fatty acids and conjugates	C24H48O3	MSUOLNSQHLHDAS-UHFFFAOYSA-N	O=C(O)C(O)CCCCCCCCCCCCCCCCCCCCCC	5096.18	1.10287e+06	2.262e+06	333556	2.79882e+06	989417
NEG_12290	[M-H]-	FA 26:0;2O	0.150184	0.630859	0.70807	411.377	12.763		Lipids and lipid-like molecules	Fatty Acyls	Fatty acids and conjugates	C26H52O3	IFYDZTDBJZWEPK-UHFFFAOYSA-N	O=C(O)C(O)CCCCCCCCCCCCCCCCCCCCCCCC	50.3669	12134.9	102764	8818.51	151093	22299.7
NEG_11262	[M-H]-	FA 26:1	0.0654932	6.31486	0.344887	393.373	13.379		Lipids and lipid-like molecules	Fatty Acyls	Fatty acids and conjugates	C26H50O2	ALQCJXNGZHBRNR-UHFFFAOYSA-N	O=C(O)CCCCCCCCCCCCCC=CCCCCCCCCCC	3997.03	344.287	319.146	235.22	282.76	220.037
NEG_12206	[M-H]-	FA 27:0	0.0546698	0.753814	0.440243	409.402	14.016		Lipids and lipid-like molecules	Fatty Acyls	Fatty acids and conjugates	C27H54O2	VXZBFBRLRNDJCS-UHFFFAOYSA-N	O=C(O)CCCCCCCCCCCCCCCCCCCCCCCCCC	2636.27	7779	7746.92	6281.49	11130.5	6681.79
NEG_12892	[M-H]-	FA 28:1	0.1549	2.24876	0.418483	421.403	13.739		Lipids and lipid-like molecules	Fatty Acyls	Fatty acids and conjugates	C28H54O2	UGGULCOQUKAIQY-UHFFFAOYSA-N	O=C(O)CCCCCCCCCCCCCCCC=CCCCCCCCCCC	130.243	9303.79	18422	1315.92	8476.06	2595.29
NEG_12195	[M-H]-	FA 28:7	0.29006	0.216948	0.109411	409.306	10.119		Lipids and lipid-like molecules	Fatty Acyls	Fatty acids and conjugates	C28H42O2	HVSUZLSWJNESIE-UHFFFAOYSA-N	O=C(O)CCCCCC=CCC=CCC=CCC=CCC=CCC=CCC=CCC	10927.2	12139.1	4898.52	10506.3	58187.2	60207.4
NEG_14191	[M-H]-	FA 30:5	0.848319	2.55169	0.191488	441.377	13.28		Lipids and lipid-like molecules	Fatty Acyls	Fatty acids and conjugates	C30H50O2	WGXVWUXXHNEMLO-UHFFFAOYSA-N	O=C(O)CCCCCCCCCCCCCC=CCC=CCC=CCC=CCC=CCC	188613	154179	473461	129533	142202	48151.9
NEG_17747	[M-H]-	FA 32:0	1.09694	0.00725402	0.277447	479.483	14.021		Lipids and lipid-like molecules	Fatty Acyls	Fatty acids and conjugates	C32H64O2	ICAIHSUWWZJGHD-UHFFFAOYSA-N	O=C(O)CCCCCCCCCCCCCCCCCCCCCCCCCCCCCCC	246.71	9889.84	2300.99	240402	1.465e+06	9172.97
NEG_21053	[M-H]-	FA 36:10	1.12188	0.579079	0.24133	515.374	10.899		Lipids and lipid-like molecules	Fatty Acyls	Fatty acids and conjugates	C36H52O2	OHEBREBOXLEJBH-UHFFFAOYSA-N	O=C(O)CCCCC=CCC=CCC=CCC=CCC=CCC=CCC=CCC=CCC=CCC=CCC	7122	1.52155e+06	1.17688e+06	1.36289e+06	1.49929e+06	1.80998e+06
NEG_6025	[M-H]-	Farrerol	0.722452	1.09077	0.899085	299.09	7.413		Phenylpropanoids and polyketides	Flavonoids	Flavans	C17H16O5	DYHOLQACRGJEHX-UHFFFAOYSA-N	CC1=C(O)C2=C(OC(CC2=O)C3=CC=C(O)C=C3)C(=C1O)C	1.13737e+06	256715	189041	297961	683098	470331
NEG_2090	[M-H]-	Ferulic acid	0.16206	4.2641	0.400156	193.049	4.674	C01494	Phenylpropanoids and polyketides	Cinnamic acids and derivatives	Hydroxycinnamic acids and derivatives	C10H10O4	KSEBMYQBYZTDHS-HWKANZROSA-N	COC1=CC(=CC=C1O)C=CC(O)=O	28365.4	3416.94	777.333	3551.78	806.341	3277.64
NEG_13555	[M-H]-	Flavanone base + 3O, O-Hex	0.492513	0.30052	0.0145234	433.114	4.891		Phenylpropanoids and polyketides	Flavonoids	Flavonoid glycosides	C21H22O10	DLIKSSGEMUFQOK-UHFFFAOYSA-N	OCC1OC(OC2=CC(=C3C(=O)CC(OC3=C2)C4=CC=C(O)C=C4)O)C(O)C(O)C1O	1124.85	62273.7	38066.7	105307	105979	126346
NEG_6967	[M-H]-	Flavokawain A	0.133857	0.793485	0.317694	313.109	7.758					C18H18O5	CGIBCVBDFUTMPT-RMKNXTFCSA-N	COC1=CC=C(C=C1)/C=C/C(=O)C2=C(C=C(C=C2OC)OC)O	78967.2	49492.3	38300	65933	66766.2	77461.7
NEG_6039	[M-H]-	Flavokawain C	0.970292	0.483595	0.109142	299.094	7.897					C17H16O5	UXUFMIJZNYXWDX-UHFFFAOYSA-N	COC1=CC(=C(C(=C1)OC)C(=O)C=CC2=CC=C(C=C2)O)O	100257	675354	294564	811562	584676	816716
NEG_18338	[M-H]-	Flemiphilippinin A	0.0433197	0.892478	0.647406	487.195	5.876					C30H32O6	VBTMMYSERQFPPK-UHFFFAOYSA-N	CC(=CCC1=C2C(=C(C3=C1OC=C(C3=O)C4=CC(=C(C=C4)O)O)O)C=C(C(O2)(C)C)C(C)(C)C=C)C	7298.05	8356.23	7092.25	11928.1	7766.77	5792.12
NEG_4221	[M-H]-	Formononetin	0.710689	6.9039	0.39949	267.065	8.541	C00858	Phenylpropanoids and polyketides	Isoflavonoids	O-methylated isoflavonoids	C16H12O4	HKQYGTCOTHHOMP-UHFFFAOYSA-N	COC1=CC=C(C=C1)C2=COC3=CC(=CC=C3C2=O)O	518773	23676	10489.1	26404.7	32460.1	21225.8
NEG_40064	[M-H]-	Forsythoside G	0.167728	2.17779	0.230374	769.369	10.436		Organic oxygen compounds	Organooxygen compounds	Carbohydrates and carbohydrate conjugates	C35H46O19	NYBPGKNJOODSEN-WJNRCRFESA-N	COC1C(OCC2OC(OCCC3=CC=C(O)C(=C3)O)C(O)C(OC4OC(C)C(O)C(O)C4O)C2OC(=O)C=CC5=CC=C(O)C(=C5)O)OCC1(O)CO	6148.63	16909.6	16470.2	13237.6	3092.84	1820.19
NEG_2791	[M-H]-	Fraxinol	0.0945079	0.636198	0.669654	221.048	2.751					C11H10O5	PBPNOAHYDPHKFH-UHFFFAOYSA-N	COC1=C(C(=C2C=CC(=O)OC2=C1)OC)O	403.67	9999.12	27398.2	382.728	45859.1	13175.1
NEG_296	[M-H]-	Fumaric acid	0.998391	0.706123	0.491351	115.004	1.139	C00122	Organic acids and derivatives	Carboxylic acids and derivatives	Dicarboxylic acids and derivatives	C4H4O4	VZCYOOQTPOCHFL-OWOJBTEDSA-N	OC(=O)C=CC(O)=O	126.192	1.95951e+06	1.24169e+06	1.61599e+06	1.66495e+06	1.25272e+06
NEG_31963	[M+HCOO]-	Furostane base -2H + O-Hex	0.0742575	0.315262	0.0337786	639.372	7.762		Lipids and lipid-like molecules	Steroids and steroid derivatives	Steroidal glycosides	C33H54O9	DFVRTHJUFCVHTR-UHFFFAOYSA-N	CC(CCC1(O)OC2CC3C4CC=C5CC(O)CCC5(C)C4CCC3(C)C2C1C)COC6OC(CO)C(O)C(O)C6O	334.47	987.801	1362.81	3567.62	1798.33	3151.02
NEG_2439	[M-H]-	Galactaric acid	0.291409	0.773021	0.716032	209.03	1.05	C00879	Organic oxygen compounds	Organooxygen compounds	Carbohydrates and carbohydrate conjugates	C6H10O8	DSLZVSRJTYRBFB-DUHBMQHGSA-N	OC(C(O)C(O)C(O)=O)C(O)C(O)=O	17.891	46487.1	189786	78181.8	96039.5	131450
NEG_8794	[M-H]-	Galdosol	0.433464	3.02101	0.176593	343.155	6.391		Lipids and lipid-like molecules	Prenol lipids	Terpene lactones	C20H24O5	SWVDNEGGBBYXGS-UWVAXJGDSA-N	CC(C)C1=CC2=C(C(=C1O)O)C34CCCC(C)(C)C3C(OC4=O)C2=O	137756	60772.3	32924.8	28507.5	19538.6	28568.3
NEG_1349	[M-H]-	Gallic acid	0.266982	0.955858	0.85969	169.013	4.133	C01424	Benzenoids	Benzene and substituted derivatives	Benzoic acids and derivatives	C7H6O5	LNTHITQWFMADLM-UHFFFAOYSA-N	OC(=O)C1=CC(=C(O)C(=C1)O)O	271169	156404	124627	190451	206157	181093
NEG_8065	[M-H]-	Gallic acid hexoside	0.544615	0.563389	0.098925	331.067	1.257		Phenylpropanoids and polyketides	Tannins		C13H16O10	GDVRUDXLQBVIKP-UHFFFAOYSA-N	OCC1OC(OC(=O)C2=CC(=C(O)C(=C2)O)O)C(O)C(O)C1O	125071	305656	282279	328860	546209	390496
NEG_30120	[M-H]-	Gallomyricitrin	0.242254	1.13032	0.692206	615.094	8.431		Phenylpropanoids and polyketides	Flavonoids	Flavonoid glycosides	C28H24O16	IXDHJNNHLVGCLC-MXXRNXGISA-N	C[C@@H]1O[C@@H](OC2=C(OC3=CC(=CC(=C3C2=O)O)O)C4=CC(=C(O)C(=C4)O)O)[C@H](OC(=O)C5=CC(=C(O)C(=C5)O)O)[C@H](O)[C@H]1O	161693	138094	58396.3	113777	89040.4	114070
NEG_45943	[M+FA-H]-	gamma-Aminobutyrate	0.164296	0.899477	0.84627	861.536	12.622		Organic acids and derivatives	Carboxylic acids and derivatives	Amino acids, peptides, and analogues	C4H9NO2	BTCSSZJGUNDROE-UHFFFAOYSA-N	NCCCC(O)=O	1504.07	36683	47514.6	32227.3	43197.9	19854.3
NEG_3998	[M-H]-	gamma-Glu-leu	1.18147	148.364	0.171635	259.13	2.274		Organic acids and derivatives	Carboxylic acids and derivatives	Amino acids, peptides, and analogues	C11H20N2O5	MYFMARDICOWMQP-YUMQZZPRSA-N	CC(C)CC(N=C(O)CCC(N)C(O)=O)C(O)=O	1121.31	840961	377899	128.835	7280.51	813.525
NEG_4793	[M-H]-	gamma-Linolenic acid	1.72364	0.436697	0.157785	277.217	11.062	C06426	Lipids and lipid-like molecules	Fatty Acyls	Lineolic acids and derivatives	C18H30O2	VZCCETWTMQHEPK-QNEBEIHSSA-N	CCCCCC=CCC=CCC=CCCCCC(O)=O	511.329	1.79569e+06	1.61461e+06	2.22357e+06	1.76447e+06	3.82242e+06
NEG_4313	[M-H]-	Genistein	0.11249	0.324968	0.0557023	269.043	6.095	C06563	Phenylpropanoids and polyketides	Isoflavonoids	Isoflav-2-enes	C15H10O5	TZBJGXHYKVUXJN-UHFFFAOYSA-N	OC1=CC=C(C=C1)C2=COC3=C(C(=CC(=C3)O)O)C2=O	1275.19	2006.13	4631.72	7243.89	5565	11541.3
NEG_5659	[M-H]-	Gingerol	2.02818	0.64658	0.340665	293.175	7.747		Benzenoids	Phenols	Methoxyphenols	C17H26O4	NLDDIKRKFXEWBK-AWEZNQCLSA-N	CCCCC[C@H](O)CC(=O)CCC1=CC(=C(O)C=C1)OC	348.473	5.81999e+06	5.17629e+06	5.99613e+06	5.27331e+06	5.73792e+06
NEG_7461	[M-H]-	Ginkgolic acid (C13:0)	0.0575086	2.80107	0.174735	319.229	9.409					C20H32O3	VEPUCZUJLKAVNM-UHFFFAOYSA-N	CCCCCCCCCCCCCC1=C(C(=CC=C1)O)C(=O)O	2357.28	950.414	877.291	998.255	174.352	321.461
NEG_8915	[M-H]-	Ginkgolic Acid C15:1	0.132003	0.510771	0.513923	345.241	5.781					C22H34O3	YXHVCZZLWZYHSA-FPLPWBNLSA-N	CCCCCC/C=C\\CCCCCCCC1=C(C(=CC=C1)O)C(=O)O	26608.1	1225.09	830.072	9755.22	8596.18	37766.3
NEG_10249	[M-H]-	Ginkgolic acid C17-1	0.21638	0.506999	0.244083	373.272	10.287					C24H38O3	MBYNDKVOZOAOIS-FPLPWBNLSA-N	CCCCCC/C=C\\CCCCCCCCCC1=C(C(=CC=C1)O)C(=O)O	152.38	45419.4	40027.7	40790	85207.2	42838.4
NEG_16513	[M-H]-	Ginnalin A	0.207887	1.27361	0.81009	467.084	3.366		Benzenoids	Benzene and substituted derivatives	Benzoic acids and derivatives	C20H20O13	IGKWMHUOBKCUQU-LTCOOKNTSA-N	OC1C(O)C(COC1COC(=O)C2=CC(=C(O)C(=C2)O)O)OC(=O)C3=CC(=C(O)C(=C3)O)O	0	191978	43058.6	122086	31297.9	31159.7
NEG_31862	[M-H]-	Ginsenoside F1	0.174722	1.01799	0.981874	637.422	12.129					C36H62O9	XNGXWSFSJIQMNC-UHFFFAOYNA-N	OCC1OC(OC(C)(CCC=C(C)C)C2CCC3(C)C2C(O)CC4C5(C)CCC(O)C(C)(C)C5C(O)CC43C)C(O)C(O)C1O	66262.1	4905.79	10620.6	33358.5	20209.3	26775.2
NEG_44133	[M+FA-H]-	Ginsenoside F2	0.204153	0.717743	0.569681	829.481	11.83					C42H72O13	SWIROVJVGRGSPO-UHFFFAOYNA-N	OCC1OC(OC2CCC3(C)C(CCC4(C)C3CC(O)C5C(CCC54C)C(OC6OC(CO)C(O)C(O)C6O)(C)CCC=C(C)C)C2(C)C)C(O)C(O)C1O	16340.3	92947.9	42299.7	48710.2	116245	46245.7
NEG_40103	[M-H]-	Ginsenoside F3	0.23445	0.642373	0.338321	769.465	11.888					C41H70O13	HJRVLGWTJSLQIG-UHFFFAOYNA-N	OC1COC(OCC2OC(OC(C)(CCC=C(C)C)C3CCC4(C)C3C(O)CC5C6(C)CCC(O)C(C)(C)C6C(O)CC54C)C(O)C(O)C2O)C(O)C1O	3936.71	88397.3	65258.7	87245.2	94725.5	63358.4
NEG_53355	[M-H]-	Ginsenoside Rb3	0.0522745	0.911621	0.92713	1077.6	13.836					C53H90O22	SNPYJWZTTUVUIS-UHFFFAOYNA-N	OCC1OC(OC2C(O)C(O)C(OC2OC3CCC4(C)C5CC(O)C6C(CCC6(C)C5CCC4C3(C)C)C(OC7OC(COC8OCC(O)C(O)C8O)C(O)C(O)C7O)(C)CCC=C(C)CC)CO)C(O)C(O)C1O	11.2125	2895.51	5775.87	911.754	7880.08	732.509
NEG_49666	[M-H]-	Ginsenoside Re	0.0487386	1.34136	0.789917	945.547	14.095					C48H82O18	PWAOOJDMFUQOKB-UHFFFAOYNA-N	OCC1OC(OC2CC3(C)C(CC(O)C4C(CCC43C)C(OC5OC(CO)C(O)C(O)C5O)(C)CCC=C(C)C)C6(C)CCC(O)C(C)(C)C26)C(OC7OC(C)C(O)C(O)C7O)C(O)C1O	63.555	957.318	3370.58	132.252	2801.93	339.689
NEG_42200	[M-H]-	Ginsenoside Rf	0.111754	0.906105	0.879769	799.475	11.477					C42H72O14	UZIOUZHBUYLDHW-UHFFFAOYNA-N	OCC1OC(OC2C(O)C(O)C(OC2OC3CC4(C)C(CC(O)C5C(CCC54C)C(O)(C)CCC=C(C)C)C6(C)CCC(O)C(C)(C)C36)CO)C(O)C(O)C1O	31270.4	2600.51	7522.5	16291	15160.7	14231
NEG_41106	[M-H]-	Ginsenoside Rg2	0.20158	0.355722	0.0844094	783.485	11.385					C42H72O13	AGBCLJAHARWNLA-UHFFFAOYNA-N	OCC1OC(OC2CC3(C)C(CC(O)C4C(CCC43C)C(O)(C)CCC=C(C)C)C5(C)CCC(O)C(C)(C)C25)C(OC6OC(C)C(O)C(O)C6O)C(O)C1O	7389.77	11848	10864.4	13997.3	41056.8	29568.7
NEG_41101	[M-H]-	Ginsenoside Rg3(R-FORM)	0.137784	0.559286	0.187836	783.479	12.379					C42H72O13	RWXIFXNRCLMQCD-UHFFFAOYNA-N	OCC1OC(OC2C(O)C(O)C(OC2OC3CCC4(C)C(CCC5(C)C4CC(O)C6C(CCC65C)C(O)(C)CCC=C(C)C)C3(C)C)CO)C(O)C(O)C1O	19276.7	13864.3	9309.24	16872.3	21145.8	37882.9
NEG_39800	[M-H]-	Ginsenoside Rg5	0.190566	0.571228	0.138902	765.479	12.274					C42H70O12	NJUXRKMKOFXMRX-UHFFFAOYNA-N	CC(=CC/C=C(\C)/[C@H]1CC[C@@]2([C@@H]1[C@@H](C[C@H]3[C@]2(CC[C@@H]4[C@@]3(CC[C@@H](C4(C)C)O[C@H]5[C@@H]([C@H]([C@@H]([C@H](O5)CO)O)O)O[C@H]6[C@@H]([C@H]([C@@H]([C@H](O6)CO)O)O)O)C)C)O)C)C	24509.4	38976.2	30358.8	31540.1	61000.9	71744.5
NEG_42974	[M+FA-H]-	Ginsenoside Rg6	0.174505	0.444976	0.0785482	811.467	12.107					C42H70O12	ZVTVWDXRNMHGNY-UHFFFAOYNA-N	OCC1OC(OC2CC3(C)C(CC(O)C4C(C(=C)CCC=C(C)C)CCC43C)C5(C)CCC(O)C(C)(C)C25)C(OC6OC(C)C(O)C(O)C6O)C(O)C1O	2932.49	15371.7	11782.7	23467	15486.2	28661.4
NEG_34691	[M+FA-H]-	Ginsenoside Rh1	0.389467	0.319254	0.210897	683.421	11.433					C36H62O9	RAQNTCRNSXYLAH-UHFFFAOYNA-N	OCC1OC(OC2CC3(C)C(CC(O)C4C(CCC43C)C(O)(C)CCC=C(C)C)C5(C)CCC(O)C(C)(C)C25)C(O)C(O)C1O	56911.3	14898.1	15822.6	157714	95672.5	21103.2
NEG_33661	[M+FA-H]-	Ginsenoside Rh2 (S-FORM)	0.470398	1.5843	0.466451	667.441	12.406					C36H62O8	CKUVNOCSBYYHIS-UHFFFAOYNA-N	OCC1OC(OC2CCC3(C)C(CCC4(C)C3CC(O)C5C(CCC54C)C(O)(C)CCC=C(C)C)C2(C)C)C(O)C(O)C1O	12394.2	155876	172288	61582.4	94614.4	58760.5
NEG_45088	[M+FA-H]-	Ginsenoside-Rg1	0.106709	0.756656	0.587835	845.468	11.339					C42H72O14	YURJSTAIMNSZAE-UHFFFAOYNA-N	OCC1OC(OC2CC3(C)C(CC(O)C4C(CCC43C)C(OC5OC(CO)C(O)C(O)C5O)(C)CCC=C(C)C)C6(C)CCC(O)C(C)(C)C26)C(O)C(O)C1O	4208.23	31890.3	11449.2	15952.7	22919.4	23967.2
NEG_16591	[M-H]-	Glabrolide	0.289514	12.0256	0.3756	467.313	11.733					C30H44O4	SSHDNSCEQSPWIM-FVTWEACWSA-N	C[C@]12CC[C@@H](C([C@@H]1CC[C@@]3([C@@H]2C(=O)C=C4[C@]3(CC[C@@]5([C@H]4C[C@@]6(C[C@H]5OC6=O)C)C)C)C)(C)C)O	81006.4	1715.93	2842.25	2549.9	3462.95	1102.38
NEG_2138	[M-H]-	Gluconic acid	0.801627	0.29463	0.0288927	195.05	1.073	C00257	Organic acids and derivatives	Hydroxy acids and derivatives	Medium-chain hydroxy acids and derivatives	C6H12O7	RGHNJXZEOKUKBD-SQOUGZDYSA-N	OCC(O)C(O)C(O)C(O)C(O)=O	6.64974	168584	107596	244883	297585	394933
NEG_849	[M-H]-	Glutamic acid	0.266777	44.647	0.362791	146.044	1.195	C00025	Organic acids and derivatives	Carboxylic acids and derivatives	Amino acids, peptides, and analogues	C5H9NO4	WHUUTDBJXJRKMK-VKHMYHEASA-N	NC(CCC(O)=O)C(O)=O	67336.8	1946.42	262.687	226.359	421.282	910.043
NEG_5640	[M-H]-	Glutamylphenylalanine	0.500809	26.4824	0.384058	293.125	2.908		Organic acids and derivatives	Carboxylic acids and derivatives	Amino acids, peptides, and analogues	C14H18N2O5	XHHOHZPNYFQJKL-UHFFFAOYSA-N	NC(CCC(=O)NC(CC1=CC=CC=C1)C(O)=O)C(O)=O	245338	1211.13	1223.2	3915.44	2290.68	3149.98
NEG_5006	[M-H]-	Glycitein	0.24255	0.603548	0.175014	283.063	7.88	C14536	Phenylpropanoids and polyketides	Isoflavonoids	Isoflav-2-enes	C16H12O5	DXYUAIFZCFRPTH-UHFFFAOYSA-N	COC1=C(O)C=C2OC=C(C(=O)C2=C1)C3=CC=C(O)C=C3	12978.3	75277.1	49981.7	82405.8	75469.9	71165.2
NEG_43679	[M-H]-	Glycyrrhizic acid	0.0533936	0.806125	0.714384	821.404	8.636		Lipids and lipid-like molecules	Prenol lipids	Terpene glycosides	C42H62O16	LPLVUJXQOOQHMX-QWBHMCJMSA-N	CC1(C)C(CCC2(C)C1CCC3(C)C2C(=O)C=C4C5CC(C)(CCC5(C)CCC34C)C(O)=O)OC6OC(C(O)C(O)C6OC7OC(C(O)C(O)C7O)C(O)=O)C(O)=O	11.9718	5986.09	3275.24	2316.98	4841.08	4345.49
NEG_17595	[M-H]-	Gossypetin-8-C-glucoside	0.043762	0.909076	0.789043	479.082	2.324					C21H20O13	SJRXVLUZMMDCNG-UHFFFAOYNA-N	O=C1C(O)=C(OC=2C(OC3OC(CO)C(O)C(O)C3O)=C(O)C=C(O)C12)C=4C=CC(O)=C(O)C4	9323.92	8147.74	8798.88	6559.33	15718.4	6620.35
NEG_21134	[M-H]-	Gossypol-acetic acid	0.275417	0.639389	0.368349	517.187	6.067					C30H30O8.C2H4O2	NIOHNDKHQHVLKA-UHFFFAOYSA-N	CC1=CC2=C(C(=C(C(=C2C(C)C)O)O)C=O)C(=C1C3=C(C4=C(C=C3C)C(=C(C(=C4C=O)O)O)C(C)C)O)O.CC(=O)O	2785.49	127586	71756.1	87106.3	106588	122432
NEG_15252	[M-H]-	Grandisin	0.123461	0.780454	0.663287	455.172	8.492		Lignans, neolignans and related compounds	Furanoid lignans	Tetrahydrofuran lignans	C24H32O7	ZPINJJOPURFFNV-UHFFFAOYSA-N	COC1=CC(=CC(=C1OC)OC)C2OC(C(C)C2C)C3=CC(=C(OC)C(=C3)OC)OC	789.718	30937.2	22198.5	26474	11371.7	31249.3
NEG_4961	[M-H]-	Guanosine	0.115805	0.581238	0.237255	282.085	1.259		Nucleosides, nucleotides, and analogues	Purine nucleosides		C10H13N5O5	NYHBQMYGNKIUIF-UUOKFMHZSA-N	OCC1OC(C(O)C1O)[N]2C=NC3=C2NC(=N)N=C3O	1354.16	15267.7	10900.1	17806.3	10995.7	18548.4
NEG_33190	[M-H]-	Gypsogenin-3-O-glucuronide	0.150675	0.616114	0.283979	659.389	11.054					C37H56O10	LHZZULHOQSQSJN-CDQBQGFXSA-N	C[C@]12CC[C@H]([C@](C1CC[C@@]3(C2CC=C4[C@]3(CC[C@@]5([C@@H]4CC(CC5)(C)C)C(=O)O)C)C)(C)C=O)O[C@H]6[C@@H]([C@H]([C@@H]([C@H](O6)C(=O)OC)O)O)O	7991.58	33369.8	18187.2	21396	44650.7	30605.1
NEG_1793	[M-H]-	Harman	0.212273	0.480894	0.129048	181.087	3.928	C09209	Alkaloids and derivatives	Harmala alkaloids		C12H10N2	PSFDQSOCUJVVGF-UHFFFAOYSA-N	CC1=NC=CC2=C1[NH]C3=CC=CC=C23	242.006	32485	20851	44315.8	32536.5	34561
NEG_2552	[M-H]-	Harmine	0.201252	0.336003	0.117035	211.076	6.75	C06538	Alkaloids and derivatives	Harmala alkaloids		C13H12N2O	BXNJHAXVSOCGBA-UHFFFAOYSA-N	COC1=CC2=C(C=C1)C3=C([NH]2)C(=NC=C3)C	3429.58	14035.1	11168.8	15159.8	24686.3	45371.8
NEG_7724	[M-H]-	Heneicosanoic acid	0.65064	1.49583	0.581607	325.311	12.61		Lipids and lipid-like molecules	Fatty Acyls	Fatty acids and conjugates	C21H42O2	CKDDRHZIAZRDBW-UHFFFAOYSA-N	CCCCCCCCCCCCCCCCCCCCC(O)=O	606.466	317015	350989	71089.2	249444	126450
NEG_4420	[M-H]-	Heptadecanoic acid	0.455367	0.717851	0.498919	269.246	11.885		Lipids and lipid-like molecules	Fatty Acyls	Fatty acids and conjugates	C17H34O2	KEMQGTRYUADPNZ-UHFFFAOYSA-N	CCCCCCCCCCCCCCCCC(O)=O	1466.41	366381	302420	287582	263472	382660
NEG_6227	[M-H]-	Herbacetin	0.324516	9.35839	0.396102	301.037	3.632	C02806	Phenylpropanoids and polyketides	Flavonoids	Flavones	C15H10O7	ZDOTZEDNGNPOEW-UHFFFAOYSA-N	OC1=CC=C(C=C1)C2=C(O)C(=O)C3=C(O2)C(=C(O)C=C3O)O	106077	2719.78	1670.08	2694.86	4469.43	4639.79
NEG_40683	[M-H]-	Heterophyllin B	0.0387668	0.762151	0.510921	777.419	10.675					C40H58N8O8	KYAVLJJQNUHRMR-ITALWQQASA-N	CCC(C)[C@H]1C(=O)N[C@@H](C(=O)NCC(=O)NCC(=O)N[C@H](C(=O)N2CCC[C@H]2C(=O)N3CCC[C@H]3C(=O)N4CCC[C@H]4C(=O)N1)CC(C)C)CC5=CC=CC=C5	10234.8	15951.6	10722.3	9968.59	12410.5	26047.8
NEG_18556	[M-H]-	Hexacyclinic acid	1.01644	1.41935	0.683741	489.214	6.847		Lipids and lipid-like molecules	Fatty Acyls	Eicosanoids	C26H34O9	OTGHTIDLDTWPFJ-ROQUJFDLSA-N	CC1C(O)C2C(C=C(C3CC4C(C23)C5C(=O)OC6CCC4(C)OC5(O)C6C)C(O)=O)C1OC(C)=O	18056.9	2.33985e+06	876827	1.26904e+06	612345	397630
NEG_5294	[M-H]-	Hexadecanedioic acid	0.306183	0.69309	0.582057	285.205	9.482	C19615	Lipids and lipid-like molecules	Fatty Acyls	Fatty acids and conjugates	C16H30O4	QQHJDPROMQRDLA-UHFFFAOYSA-N	OC(=O)CCCCCCCCCCCCCCC(O)=O	8117.08	200197	52554.6	69765.2	152335	154284
NEG_11352	[M+HCOO]-	Hexose + C10H19O2	0.0926871	0.922585	0.790185	395.192	4.149		Organic oxygen compounds	Organooxygen compounds	Carbohydrates and carbohydrate conjugates	C16H30O8	RPCUMNYZTIHHPA-UHFFFAOYSA-N	CC(C)(OC1OC(CO)C(O)C(O)C1O)C2CCC(C)(O)C(O)C2	14172.5	36214	18874.1	23315.3	24397.6	27359.4
NEG_12452	[M+HCOO]-	Hexose + C13H19O	0.194802	0.363529	0.0283341	415.197	5.722		Lipids and lipid-like molecules	Fatty Acyls	Fatty acyl glycosides	C19H30O7	SZOPSAFLRCYJCX-UHFFFAOYSA-N	CC(OC1OC(CO)C(O)C(O)C1O)C=CC2C(=CC(=O)CC2(C)C)C	852.81	13533.2	9374.08	20277.1	25304.6	19777.9
NEG_13583	[M+HCOO]-	Hexose + C13H21O2	0.087865	0.853677	0.728828	433.202	6.272		Lipids and lipid-like molecules	Fatty Acyls	Fatty acyl glycosides	C19H32O8	ZZFQYZCZBBRLTI-UHFFFAOYSA-N	CC(CCC1C(=CC(=O)CC1(C)C)CO)OC2OC(CO)C(O)C(O)C2O	2811.82	19696.6	13023.9	13616.3	18129.3	9877.04
NEG_23191	[M-H]-	Hinokiflavone	0.0650107	0.744508	0.5493	537.09	2.844		Phenylpropanoids and polyketides	Flavonoids	Flavones	C30H18O10	WTDHMFBJQJSTMH-UHFFFAOYSA-N	OC1=CC=C(C=C1)C2=CC(=O)C3=C(O2)C=C(O)C(=C3O)OC4=CC=C(C=C4)C5=CC(=O)C6=C(O)C=C(O)C=C6O5	2963.25	14188.4	7219.27	14833.1	12267.8	5633.36
NEG_6003	[M-H]-	Hispidulin	0.317342	0.518254	0.136318	299.054	6.657	C10058	Phenylpropanoids and polyketides	Flavonoids	O-methylated flavonoids	C16H12O6	IHFBPDAQLQOCBX-UHFFFAOYSA-N	COC1=C(O)C2=C(OC(=CC2=O)C3=CC=C(O)C=C3)C=C1O	2182.4	87462	67429.9	91763	105570	105751
NEG_1782	[M-H]-	Homovanillic acid	0.665554	0.346952	0.0809183	181.052	6.47	C05582	Benzenoids	Phenols	Methoxyphenols	C9H10O4	QRMZSPFSDQBLIX-UHFFFAOYSA-N	COC1=CC(=CC=C1O)CC(O)=O	79903.3	126961	71126.6	137645	390562	273030
NEG_15781	[M+FA-H]-	Hydrangeifolin I	0.241162	4.74975	0.332353	461.17	4.597		Organic oxygen compounds	Organooxygen compounds	Carbohydrates and carbohydrate conjugates	C19H28O10	SMUMBCREXHTKFN-VZOUQOBNSA-N	C[C@@H]1O[C@@H](OC[C@H]2O[C@@H](OCC3=CC=CC=C3)[C@H](O)[C@@H](O)[C@@H]2O)[C@H](O)[C@H](O)[C@H]1O	52232	3418.26	9634.18	10049.5	929.105	2766.2
NEG_2016	[M-H]-	Hydron;2-hydroxypropane-1,2,3-tricarboxylate	0.199389	0.635077	0.278668	191.02	2.335		Organic acids and derivatives	Carboxylic acids and derivatives	Tricarboxylic acids and derivatives	C6H8O7	KRKNYBCHXYNGOX-UHFFFAOYSA-N	OC(=O)CC(O)(CC(O)=O)C(O)=O	58388.8	89704.8	146167	111405	228007	123934
NEG_370	[M-H]-	Hydron;benzoate	0.287695	0.407212	0.124884	121.028	3.586		Benzenoids	Benzene and substituted derivatives	Benzoic acids and derivatives	C7H6O2	WPYMKLBDIGXBTP-UHFFFAOYSA-N	OC(=O)C1=CC=CC=C1	423.215	45150.6	34147.8	45283.3	56409.2	94082.1
NEG_195	[M-H]-	Hydron;propanedioate	0.0480354	0.849166	0.749039	103.001	1.124		Organic acids and derivatives	Carboxylic acids and derivatives	Dicarboxylic acids and derivatives	C3H4O4	OFOBLEOULBTSOW-UHFFFAOYSA-N	OC(=O)CC(O)=O	15591.2	23123.3	5300.52	28433.3	11474.7	11925.2
NEG_5657	[M-H]-	Hydron;tetradecyl sulfate	0.332877	1.18938	0.651082	293.174	9.31		Organic acids and derivatives	Organic sulfuric acids and derivatives	Sulfuric acid esters	C14H30O4S	URLJMZWTXZTZRR-UHFFFAOYSA-N	CCCCCCCCCCCCCCO[S](O)(=O)=O	50699.4	135954	131576	122844	93315.1	51399.3
NEG_2449	[M-H]-	Hydroxyferulic acid	0.151949	0.445489	0.179145	209.045	3.804		Phenylpropanoids and polyketides	Cinnamic acids and derivatives	Hydroxycinnamic acids and derivatives	C10H10O5	YFXWTVLDSKSYLW-UHFFFAOYSA-N	COC1=CC(=CC(=C1O)O)C=CC(O)=O	12293.8	9235.4	6067.82	8337.33	31832.6	21777.8
NEG_11150	[M-H]-	Hyodeoxycholic acid	0.0361643	0.653945	0.550664	391.281	5.732		Lipids and lipid-like molecules	Steroids and steroid derivatives	Bile acids, alcohols and derivatives	C24H40O4	DGABKXLVXPYZII-SIBKNCMHSA-N	C[C@H](CCC(O)=O)[C@H]1CC[C@H]2[C@@H]3C[C@H](O)[C@@H]4C[C@H](O)CC[C@]4(C)[C@H]3CC[C@]12C	277.269	2190.75	589.79	813.052	2699.57	1163.32
NEG_8474	[M-H]-	Indole + 1O, 1carboxy, O-Hex	0.102979	0.671859	0.515692	338.088	4.165		Organoheterocyclic compounds	Indoles and derivatives	Indolecarboxylic acids and derivatives	C15H17NO8	VZZSVZUINKFSIE-UHFFFAOYSA-N	OCC1OC(OC(=O)C2=C[NH]C3=CC(=CC=C23)O)C(O)C(O)C1O	333.646	12331.8	13561.1	21493.6	9459.43	8082.8
NEG_2338	[M-H]-	Indole-3-lactic acid	0.377281	0.223727	0.00898497	204.064	2.639		Organoheterocyclic compounds	Indoles and derivatives	Indolyl carboxylic acids and derivatives	C11H11NO3	XGILAAMKEQUXLS-UHFFFAOYSA-N	OC(CC1=C[NH]C2=C1C=CC=C2)C(O)=O	162.089	22684.4	14457.6	60816.4	43098.1	62824.7
NEG_2573	[M-H]-	Indoxyl sulfate	0.379507	9.93463	0.172653	212.004	2.007		Organic acids and derivatives	Organic sulfuric acids and derivatives	Arylsulfates	C8H7NO4S	BXFFHSIDQOFMLE-UHFFFAOYSA-N	O[S](=O)(=O)OC1=C[NH]C2=C1C=CC=C2	46.3345	79022.5	48757.7	5326	7511.84	28.9112
NEG_4226	[M-H]-	Inosine	0.168125	0.452843	0.095225	267.067	7.941		Nucleosides, nucleotides, and analogues	Purine nucleosides		C10H12N4O5	UGQMRVRMYYASKQ-KQYNXXCUSA-N	OCC1OC(C(O)C1O)[N]2C=NC3=C2N=CN=C3O	346.954	17121.2	11234.6	22878.3	17092.5	23412.6
NEG_7583	[M-H]-	Isobavachin	0.0555365	0.633643	0.40636	323.13	2.742		Phenylpropanoids and polyketides	Flavonoids	Flavans	C20H20O4	KYFBXCHUXFKMGQ-IBGZPJMESA-N	CC(C)=CCC1=C2O[C@@H](CC(=O)C2=CC=C1O)C3=CC=C(O)C=C3	6994.96	3140.4	15813.5	14774.7	19732.8	6444.4
NEG_4367	[M-H]-	Isoimperatorin	0.387553	0.989866	0.975299	269.083	9.59		Phenylpropanoids and polyketides	Coumarins and derivatives	Furanocoumarins	C16H14O4	IGWDEVSBEKYORK-UHFFFAOYSA-N	CC(C)=CCOC1=C2C=COC2=CC3=C1C=CC(=O)O3	240418	271703	253661	384386	113212	276023
NEG_6006	[M-H]-	Isokaempferide	0.219403	0.988759	0.967965	299.058	6.73	C05902	Phenylpropanoids and polyketides	Flavonoids	O-methylated flavonoids	C16H12O6	VJJZJBUCDWKPLC-UHFFFAOYSA-N	COC1=C(OC2=C(C(=CC(=C2)O)O)C1=O)C3=CC=C(O)C=C3	154707	86891.8	64540	101821	106251	101548
NEG_29492	[M-H]-	Isoreserpin	0.0478393	0.631962	0.037454	607.266	8.116		Alkaloids and derivatives	Yohimbine alkaloids		C33H40N2O9	QEVHRUUCFGRFIF-UHFFFAOYNA-N	COC1C(CC2CN3CCC4=C([NH]C5=C4C=CC(=C5)OC)C3CC2C1C(=O)OC)OC(=O)C6=CC(=C(OC)C(=C6)OC)OC	3370.98	2760.31	2952.59	4432.55	5864.42	4077.12
NEG_7083	[M-H]-	Isorhamnetin	0.0776106	0.809566	0.557613	315.052	6.154	C10084	Phenylpropanoids and polyketides	Flavonoids	Flavones	C16H12O7	IZQSVPBOUDKVDZ-UHFFFAOYSA-N	COC1=C(O)C=CC(=C1)C2=C(O)C(=O)C3=C(O2)C=C(O)C=C3O	20104.5	8694.81	6242.9	13516	15246.8	14522.4
NEG_30835	[M-H]-	Isorhamnetin-3-O-galactoside-6''-rhamnoside	0.11995	0.618289	0.415005	623.156	4.244					C28H32O16	UIDGLYUNOUKLBM-UHFFFAOYNA-N	COC1=C(O)C=CC(=C1)C1=C(OC2O[C@H](CO[C@@H]3O[C@@H](C)[C@H](O)[C@@H](O)[C@H]3O)[C@H](O)[C@H](O)[C@H]2O)C(=O)C2=C(O1)C=C(O)C=C2O	380.604	26091.8	8449.93	21812.5	20188.4	14481.4
NEG_12668	[M-H]-	Isorhapontin	0.968794	0.506138	0.0942148	419.135	4.525	C10266	Phenylpropanoids and polyketides	Stilbenes	Stilbene glycosides	C21H24O9	KLPUXMNQDCUPNO-DXKBKAGUSA-N	COC1=C(O)C=CC(=C1)C=CC2=CC(=CC(=C2)OC3OC(CO)C(O)C(O)C3O)O	65267	707453	545443	845402	819678	939275
NEG_5237	[M-H]-	Isosakuranetin	0.645762	1.35989	0.683563	285.076	6.482	C05334	Phenylpropanoids and polyketides	Flavonoids	O-methylated flavonoids	C16H14O5	HMUJXQRRKBLVOO-AWEZNQCLSA-N	COC1=CC=C(C=C1)[C@@H]2CC(=O)C3=C(O2)C=C(O)C=C3O	639480	52182.4	247402	202067	114088	374391
NEG_7929	[M-H]-	Jaceosidin	0.124574	4.48625	0.380512	329.065	6.596					C17H14O7	GLAAQZFBFGEBPS-UHFFFAOYSA-N	COC1=C(C=CC(=C1)C2=CC(=O)C3=C(O2)C=C(C(=C3O)OC)O)O	15681.6	1544.2	1026.49	1278.53	1436.3	1353.68
NEG_5210	[M-H]-	Kaempferol	0.167217	1.06642	0.911468	285.041	6.988	C05903	Phenylpropanoids and polyketides	Flavonoids	Flavones	C15H10O6	IYRMWMYZSQPJKC-UHFFFAOYSA-N	OC1=CC=C(C=C1)C2=C(O)C(=O)C3=C(O2)C=C(O)C=C3O	5636.5	59587.4	28842.2	20440.5	29021.6	38745.4
NEG_29605	[M-H]-	Kaempferol 3-O-sophoroside	0.145441	0.225919	0.193739	609.143	3.621					C27H30O16	LKZDFKLGDGSGEO-UHFFFAOYNA-N	C1=CC(=CC=C1C2=C(C(=O)C3=C(C=C(C=C3O2)O)O)O[C@H]4[C@@H]([C@H]([C@@H]([C@H](O4)CO)O)O)O[C@H]5[C@@H]([C@H]([C@@H]([C@H](O5)CO)O)O)O)O	1997.08	3400.88	3582.06	4624.13	26112	9012.77
NEG_29685	[M-H]-	Kaempferol 3,7-diglucoside	0.216339	11.7539	0.377402	609.335	7.857		Phenylpropanoids and polyketides	Flavonoids	Flavonoid glycosides	C27H30O16	XFFQVRFGLSBFON-DEFKTLOSSA-N	OCC1OC(OC2=CC(=C3C(=O)C(=C(OC3=C2)C4=CC=C(O)C=C4)OC5OC(CO)C(O)C(O)C5O)O)C(O)C(O)C1O	45586.2	1447.56	1042.53	1035	1362.65	1692.61
NEG_28329	[M-H]-	Kaempferol 7-neohesperidoside	0.089242	1.64472	0.465915	593.149	4.09		Phenylpropanoids and polyketides	Flavonoids	Flavonoid glycosides	C27H30O15	ZEJXENDZTYVXDP-CSJHBIPPSA-N	C[C@@H]1O[C@@H](O[C@@H]2[C@@H](O)[C@H](O)[C@@H](CO)O[C@H]2OC3=CC4=C(C(=C3)O)C(=O)C(=C(O4)C5=CC=C(O)C=C5)O)[C@H](O)[C@H](O)[C@H]1O	11361.2	4784.57	1599.51	3955.22	3326.97	3507
NEG_22447	[M-H]-	Kukoamine A	0.168063	0.809692	0.491065	529.295	10.443					C28H42N4O6	IOLDDENZPBFBHV-UHFFFAOYSA-N	C1=CC(=C(C=C1CCC(=O)NCCCNCCCCNCCCNC(=O)CCC2=CC(=C(C=C2)O)O)O)O	34832.1	81638.4	76702.3	60067.5	73347.8	105160
NEG_22451	[M-H]-	Kukoamine B	0.187411	0.410212	0.415756	529.301	10.308					C28H42N4O6	IWRAOCFRRTWUDF-UHFFFAOYSA-N	C1=CC(=C(C=C1CCC(=O)NCCCNCCCCN(CCCN)C(=O)CCC2=CC(=C(C=C2)O)O)O)O	38361	10262.8	12769.2	18305.4	19117.2	112239
NEG_1953	[M-H]-	Kynurenic acid	0.0955137	1.68478	0.712218	188.031	2.574	C01717	Organoheterocyclic compounds	Quinolines and derivatives	Quinoline carboxylic acids	C10H7NO3	HCZHHEIFKROPDY-UHFFFAOYSA-N	OC(=O)C1=CC(=O)C2=C(N1)C=CC=C2	21.7809	1398.18	11990.6	30.1648	7844.83	84.8381
NEG_1704	[2M-H]-	L-Allopyranose	3.51466	13.4532	0.388759	179.056	1.22	C01487	Organic oxygen compounds	Organooxygen compounds	Carbohydrates and carbohydrate conjugates	C6H12O6	WQZGKKKJIJFFOK-HOWGCPQDSA-N	OC[C@@H]1OC(O)[C@@H](O)[C@@H](O)[C@H]1O	1.22389e+07	215564	135300	238407	301886	395524
NEG_594	[M-H]-	L-Malic acid	2.0234	0.657253	0.407575	133.014	1.134	C00149	Organic acids and derivatives	Hydroxy acids and derivatives	Beta hydroxy acids and derivatives	C4H6O5	BJEPYKJPYRNKOW-REOHCLBHSA-N	O[C@@H](CC(O)=O)C(O)=O	43.7644	7.23717e+06	4.22274e+06	6.19863e+06	6.39504e+06	4.84246e+06
NEG_457	[M-H]-	L-Pyroglutamic acid	0.139653	0.402353	0.11065	128.035	1.115	C01879	Organic acids and derivatives	Carboxylic acids and derivatives	Amino acids, peptides, and analogues	C5H7NO3	ODHCTXKNWHHXJC-VKHMYHEASA-N	OC(=O)C1CCC(=N1)O	14.8542	9993.15	8876.36	12308.5	22277.1	12349.3
NEG_1202	[M-H]-	L-Rhamnose	0.573056	0.428653	0.0983496	163.062	1.149					C6H12O5	PNNNRSAQSRJVSB-BXKVDMCESA-N	C[C@@H]([C@@H]([C@H]([C@H](C=O)O)O)O)O	4.32506	200458	84737	222401	239556	203381
NEG_8774	[M-H]-	Lactitol	0.376924	0.563931	0.27402	343.126	1.142		Lipids and lipid-like molecules	Fatty Acyls	Fatty acyl glycosides	C12H24O11	VQHSOMBJVWLPSR-JVCRWLNRSA-N	OCC(O)C(O)C(OC1OC(CO)C(O)C(O)C1O)C(O)CO	4.23016	177686	80539.5	141771	174799	141340
NEG_10864	[M-H]-	Lactose	2.37084	0.465693	0.13995	387.115	1.126					C12H22O11	GUBGYTABKSRVRQ-PICCSMPSSA-N	C([C@@H]1[C@H]([C@@H]([C@H]([C@H](O1)O[C@@H]2[C@H](OC([C@@H]([C@H]2O)O)O)CO)O)O)O)O	9.73671	4.18576e+06	2.09673e+06	4.46297e+06	5.3779e+06	3.64977e+06
NEG_8630	[M-H]-	Lactulose	4.77974	45.5861	0.378246	341.107	1.244	C07064	Organic oxygen compounds	Organooxygen compounds	Carbohydrates and carbohydrate conjugates	C12H22O11	JCQLYHFGKNRPGE-FCVZTGTOSA-N	OCC1OC(OC2C(CO)OC(O)(CO)C2O)C(O)C(O)C1O	2.2075e+07	126405	51562.8	143333	203403	141416
NEG_10875	[M+HCOO]-	Laricin	0.30368	0.390813	0.0245825	387.127	3.744		Organic oxygen compounds	Organooxygen compounds	Carbohydrates and carbohydrate conjugates	C16H22O8	SFLMUHDGSQZDOW-UHFFFAOYSA-N	COC1=CC(=CC=C1OC2OC(CO)C(O)C(O)C2O)C=CCO	16734.6	28546.6	13447.2	63254.3	37746.5	49271.6
NEG_4188	[M-H]-	Lauryl sulfate	1.6738	0.561767	0.223733	265.148	9.375		Organic acids and derivatives	Organic sulfuric acids and derivatives	Sulfuric acid esters	C12H26O4S	MOTZDAYCYVMXPC-UHFFFAOYSA-N	CCCCCCCCCCCCO[S](O)(=O)=O	1824.1	3.12786e+06	2.05049e+06	3.13775e+06	2.71537e+06	3.3681e+06
NEG_486	[M-H]-	Leucine	0.255594	0.176393	0.0455043	130.086	1.261	C00123	Organic acids and derivatives	Carboxylic acids and derivatives	Amino acids, peptides, and analogues	C6H13NO2	ROHFNLRQFUQHCH-YFKPBYRVSA-N	CC(C)CC(N)C(O)=O	91.3469	8808.95	5808.09	15843.1	25756.7	41784.4
NEG_19155	[M-H]-	Leukotriene D4	0.168628	1.0286	0.934951	495.256	4.388		Lipids and lipid-like molecules	Fatty Acyls	Eicosanoids	C25H40N2O6S	YEESKJGWJFYOOK-IJHYULJSSA-N	CCCCC\\C=C/C/C=C\\C=C\\C=C\\[C@@H](SC[C@H](N)C(=O)NCC(O)=O)[C@@H](O)CCCC(O)=O	14742.3	45839.1	43192	41303.1	34916.7	24668.7
NEG_10884	[M-H]-	Levocetirizine	0.162656	0.613	0.30012	387.139	5.908		Benzenoids	Benzene and substituted derivatives	Diphenylmethanes	C21H25ClN2O3	ZKLPARSLTMPFCP-OAQYLSRUSA-N	OC(=O)COCCN1CCN(CC1)C(C2=CC=CC=C2)C3=CC=C(Cl)C=C3	4121.71	41964.2	17067.6	36540.3	34302.7	32180.7
NEG_2172	[M-H]-	Levodopa	0.259216	0.560514	0.251101	196.06	5.777	C00355	Organic acids and derivatives	Carboxylic acids and derivatives	Amino acids, peptides, and analogues	C9H11NO4	WTDRDQBEARUVNC-LURJTMIESA-N	NC(CC1=CC=C(O)C(=C1)O)C(O)=O	75.2732	79365.5	41538.6	77101.2	60655.7	78079.7
NEG_8442	[M-H]-	Licochalcone A	0.0893986	0.61207	0.325663	337.148	2.731					C21H22O4	KAZSKMJFUPEHHW-DHZHZOJOSA-N	CC(C)(C=C)C1=C(C=C(C(=C1)/C=C/C(=O)C2=CC=C(C=C2)O)OC)O	1743.59	10696.5	6286.35	14856.3	6790.26	8948.69
NEG_44636	[M-H]-	Licoricesaponin G2	0.0226981	0.745323	0.543215	837.407	7.247					C42H62O17	WBQVRPYEEYUEBQ-UHFFFAOYNA-N	O=C(O)C1OC(OC2C(OC(C(=O)O)C(O)C2O)OC3CCC4(C)C5C(=O)C=C6C7CC(C(=O)O)(C)CCC7(C)CCC6(C)C5(C)CCC4C3(C)CO)C(O)C(O)C1O	1636.57	1210.47	591.763	1208.16	2531.95	873.728
NEG_43676	[M-H]-	Licoricesaponin H2	0.0351003	1.07463	0.803788	821.393	7.236					C42H62O16	LPLVUJXQOOQHMX-UHFFFAOYNA-N	O=C(O)C1OC(OC2C(OC(C(=O)O)C(O)C2O)OC3CCC4(C)C5C(=O)C=C6C7CC(C(=O)O)(C)CCC7(C)CCC6(C)C5(C)CCC4C3(C)C)C(O)C(O)C1O	988.833	1003.5	2000.27	1201.73	1419.74	1093.87
NEG_37149	[M-H]-	Ligustroflavone	0.0293608	5.19321	0.335413	723.224	9.368					C33H40O18	NULBHTHMVOCGOE-ZBCCAYPVSA-N	C[C@H]1[C@@H]([C@H]([C@H]([C@@H](O1)OC[C@@H]2[C@H]([C@@H]([C@H]([C@@H](O2)OC3=CC(=C4C(=C3)OC(=CC4=O)C5=CC=C(C=C5)O)O)O[C@H]6[C@@H]([C@@H]([C@H]([C@@H](O6)C)O)O)O)O)O)O)O)O	818.087	196.593	0	0	135.164	60.2219
NEG_4855	[M-H]-	Linoleic acid	0.205844	0.357126	0.108084	279.231	14.14	C01595	Lipids and lipid-like molecules	Fatty Acyls	Lineolic acids and derivatives	C18H32O2	OYHQOLUKZRVURQ-HZJYTTRNSA-N	CCCCCC=CCC=CCCCCCCCC(O)=O	4936.76	15526.1	10346.6	18854.3	21904.4	45511.8
NEG_4789	[M-H]-	Linolenic acid	1.48561	20.8762	0.382718	277.217	11.179	C06427	Lipids and lipid-like molecules	Fatty Acyls	Lineolic acids and derivatives	C18H30O2	DTOSIQBPPRVQHS-PDBXOOCHSA-N	CC\\C=C/C/C=C\\C\\C=C/CCCCCCCC(O)=O	2.1575e+06	20218.6	21229.8	43819.2	11983.8	49530.1
NEG_29495	[M-H]-	Lipedoside A	0.0843932	0.940433	0.960724	607.289	8.822		Phenylpropanoids and polyketides	Cinnamic acids and derivatives	Hydroxycinnamic acids and derivatives	C29H36O14	IAWTWHSGLMCXSV-ATYIUYMASA-N	CCOC1OC(CO)C(OC(=O)C=CC2=CC=C(O)C=C2)C(OC3OC(C)C(O)C(O)C3O)C1(O)C4=CC=C(O)C(=C4)O	14789.4	270.683	429.445	1441.29	13436	1593.39
NEG_12529	[M-H]-	Liquiritin	0.157576	0.548092	0.322769	417.118	6.067					C21H22O9	DEMKZLAVQYISIA-UHFFFAOYNA-N	O=C1C2=CC=C(O)C=C2OC(C3=CC=C(OC4OC(CO)C(O)C(O)C4O)C=C3)C1	2522.81	29579.8	17836.1	30781.2	14019.4	46313.1
NEG_10347	[M-H]-	Lithocholic acid （LCA）	0.30562	0.742783	0.640631	375.29	10.6		Lipids and lipid-like molecules	Steroids and steroid derivatives	Bile acids, alcohols and derivatives	C24H40O3	SMEROWZSTRWXGI-UOGOSWAHSA-N	C[C@H](CCC(O)=O)[C@H]1CC[C@H]2[C@@H]3CC[C@@H]4C[C@H](O)CC[C@]4(C)[C@H]3CC[C@]12C	96.0717	267185	96644.9	214986	160555	114409
NEG_10304	[M-H]-	Loganic acid	0.456255	8.58637	0.0239795	375.132	1.679		Lipids and lipid-like molecules	Prenol lipids	Terpene glycosides	C16H24O10	JNNGEAWILNVFFD-CDJYTOATSA-N	CC1C(O)CC2C1C(OC=C2C(O)=O)OC3OC(CO)C(O)C(O)C3O	79220.1	68510.4	30684.4	8171.49	9306.93	3300.43
NEG_5195	[M-H]-	Luteolin	0.643518	0.50776	0.142647	285.038	6.363	C01514	Phenylpropanoids and polyketides	Flavonoids	Flavones	C15H10O6	IQPNAANSBPBGFQ-UHFFFAOYSA-N	OC1=CC(=C2C(=O)C=C(OC2=C1)C3=CC(=C(O)C=C3)O)O	12792.5	351346	195514	384734	333506	383958
NEG_53248	[M-H]-	Macranthoside B	0.160635	0.496045	0.264234	1073.56	10.406					C53H86O22	KPDVIKCSTOVVEA-KZFFKTSUSA-N	C[C@H]1[C@@H]([C@H]([C@H]([C@@H](O1)O[C@@H]2[C@H]([C@H](CO[C@H]2O[C@H]3CC[C@]4([C@H]([C@]3(C)CO)CC[C@@]5([C@@H]4CC=C6[C@]5(CC[C@@]7([C@H]6CC(CC7)(C)C)C(=O)O)C)C)C)O)O)O)O[C@H]8[C@@H]([C@H]([C@@H]([C@H](O8)CO)O[C@H]9[C@@H]([C@H]([C@@H]([C@H](O9)CO)O)O)O)O)O)O	6659.17	4045.04	59595.9	43559.1	53246.3	44916.1
NEG_19978	[M-H]-	Madecassic acid	0.219736	2.57139	0.506519	503.335	8.016					C30H48O6	PRAUVHZJPXOEIF-UHFFFAOYSA-N	CC1CCC2(CCC3(C(=CCC4C3(CC(C5C4(CC(C(C5(C)CO)O)O)C)O)C)C2C1C)C)C(=O)O	60221	6210.3	2040.77	5483.54	16657	4487.9
NEG_50755	[M-H]-	Madecassoside	0.0400262	1.35202	0.360103	973.484	12.355					C48H78O20	BNMGUJRJUUDLHW-UHFFFAOYNA-N	O=C(OC1OC(COC2OC(CO)C(OC3OC(C)C(O)C(O)C3O)C(O)C2O)C(O)C(O)C1O)C45CCC(C)C(C)C5C6=CCC7C8(C)CC(O)C(O)C(C)(CO)C8C(O)CC7(C)C6(C)CC4	685.299	1630.9	1089.94	717.088	998.356	803.857
NEG_16955	[M-H]-	Maslinic acid	0.103651	0.315869	0.259014	471.347	9.328					C30H48O4	MDZKJHQSJHYOHJ-UHFFFAOYNA-N	O=C(O)C12CCC(C)(C)CC2C3=CCC4C5(C)CC(O)C(O)C(C)(C)C5CCC4(C)C3(C)CC1	1750.4	4189.27	128.837	617.84	11308.1	7286.17
NEG_9462	[M-H]-	Matairesinol	0.180205	0.503039	0.137329	357.127	6.337					C20H22O6	MATGKVZWFZHCLI-UHFFFAOYNA-N	O=C1OCC(CC2=CC=C(O)C(OC)=C2)C1CC3=CC=C(O)C(OC)=C3	4022.99	26876.8	11191.7	26822.2	22932.3	33919.9
NEG_51639	[M-H]-	MCLY	0.0142963	1.48346	0.585532	1000.52	13.593					C52H71N7O13	SIGQAYSWORHPPH-GFXLLRAPSA-N	CC(C)CC\1/C(=N/C(C(C)/C(=N/C(CC2=CC=C(C=C2)O)/C(=N\C(/C=C\C(=C\C(C)C(CC3=CC=CC=C3)OC)\C)C(C)/C(=N/C(CCC(=O)N(C)C(=C)/C(=N/C(C)/C(=N1)/O)/O)C(=O)O)/O)/O)/O)C(=O)O)/O	25.5255	227.497	118.567	14.8327	131.286	104.37
NEG_19752	[M-H]-	Medicagenic acid	0.268537	0.775048	0.731923	501.317	7.688		Lipids and lipid-like molecules	Prenol lipids	Triterpenoids	C30H46O6	IDGXIXSKISLYAC-WNTKNEGGSA-N	CC1(C)CC[C@@]2(CC[C@]3(C)C(=CC[C@@H]4[C@@]5(C)C[C@H](O)[C@H](O)[C@](C)([C@@H]5CC[C@@]34C)C(O)=O)[C@@H]2C1)C(O)=O	3003.15	194651	43602.3	56364.3	112506	142410
NEG_19880	[M-H]-	Melezitose	0.48904	0.187586	0.115141	503.166	1.127	C08243	Organic oxygen compounds	Organooxygen compounds	Carbohydrates and carbohydrate conjugates	C18H32O16	QWIZNVHXZXRPDR-WSCXOGSTSA-N	OCC1OC(OC2C(O)C(CO)OC2(CO)OC3OC(CO)C(O)C(O)C3O)C(O)C(O)C1O	0	45309.3	19110.4	35716.3	189481	118217
NEG_18912	[M-H]-	Methoxy-myricetin-3-O-hexoside	0.310729	0.353791	0.131348	493.097	4.882		Phenylpropanoids and polyketides	Flavonoids	Flavonoid glycosides	C22H22O13	SCHVWZLYQPLPJV-UHFFFAOYSA-N	COC1=C(O)C=C(C=C1O)C2=C(OC3OC(CO)C(O)C(O)C3O)C(=O)C4=C(O)C=C(O)C=C4O2	20.4521	45226.2	16385.4	38378.6	87007.9	48818
NEG_9931	[M-H]-	Methoxyfenozide	0.0243216	0.731379	0.525546	367.201	7.621		Organic oxygen compounds	Organooxygen compounds	Carbohydrates and carbohydrate conjugates	C22H28N2O3	QCAWEPFNJXQPAN-UHFFFAOYSA-N	COC1=CC=CC(=C1C)C(=O)NN(C(=O)C2=CC(=CC(=C2)C)C)C(C)(C)C	1355.15	421.764	269.488	835.673	786.913	1175.41
NEG_6375	[M+Cl]-	Methyl 1-oxo-4-(1H-pyrrol-2-yl)-2H-isoquinoline-3-carboxylate	0.552885	0.468564	0.130391	303.05	2.881		Organoheterocyclic compounds	Isoquinolines and derivatives	Isoquinolones and derivatives	C15H12N2O3	IADWMRZHOGHTMQ-UHFFFAOYSA-N	COC(=O)C1=NC(=C2C=CC=CC2=C1C3=CC=C[NH]3)O	8110.56	227950	89937.7	238203	212598	244938
NEG_1838	[M-H]-	Methyl gallate	0.553076	0.448113	0.615721	183.03	3.37		Benzenoids	Benzene and substituted derivatives	Benzoic acids and derivatives	C8H8O5	FBSFWRHWHYMIOG-UHFFFAOYSA-N	COC(=O)C1=CC(=C(O)C(=C1)O)O	346480	24425.9	10199.7	10577.7	815750	24140.3
NEG_7187	[M-H]-	Methyl hexadecanoate	0.12713	3.93362	0.378311	315.248	9.464					C17H34O2	FLIACVVOZYBSBS-UHFFFAOYSA-N	CCCCCCCCCCCCCCCC(=O)OC	16762.3	2763.16	630.598	1371.94	1959.25	1792.84
NEG_1785	[M-H]-	Methyl vanillate	0.13625	9.17206	0.409183	181.053	4.24		Benzenoids	Benzene and substituted derivatives	Benzoic acids and derivatives	C9H10O4	BVWTXUYLKBHMOX-UHFFFAOYSA-N	COC(=O)C1=CC=C(O)C(=C1)OC	19101.9	263.179	166.669	559.078	488.03	1082.37
NEG_52635	[M-H]-	Microcystin YR	0.578867	1.09252	0.870825	1043.54	10.081		Organic acids and derivatives	Peptidomimetics	Hybrid peptides	C52H72N10O13	OWHASZQTEFAUJC-GJRPNUFSSA-N	CO[C@@H](CC1=CC=CC=C1)[C@@H](C)/C=C(C)/C=C/[C@@H]2NC(=O)[C@H](CCCN=C(N)N)NC(=O)[C@@H](C)[C@@H](NC(=O)[C@H](CC3=CC=C(O)C=C3)NC(=O)[C@@H](C)NC(=O)C(=C)N(C)C(=O)CC[C@@H](NC(=O)[C@H]2C)C(O)=O)C(O)=O	29781.1	563840	363280	285847	303435	286584
NEG_51463	[M-H]-	Microcystin-LR	0.0178939	0.709192	0.531103	993.526	13.026		Organic nitrogen compounds	Organonitrogen compounds	Guanidines	C49H74N10O12	ZYZCGGRZINLQBL-GWRQVWKTSA-N	COC(CC1=CC=CC=C1)C(C)C=C(C)C=CC2NC(=O)C(CCCN=C(N)N)NC(=O)C(C)C(NC(=O)C(CC(C)C)NC(=O)C(C)NC(=O)C(=C)N(C)C(=O)CCC(NC(=O)C2C)C(O)=O)C(O)=O	1254.67	577.217	465.788	375.565	1155.35	1708.94
NEG_14264	[M+FA-H]-	Mitragynine	0.350675	0.581648	0.258112	443.217	3.134					C23H30N2O4	LELBFTMXCIIKKX-UHFFFAOYNA-N	O=C(OC)C(=COC)C1CC2C=3NC=4C=CC=C(OC)C4C3CCN2CC1CC	79.1145	146570	100434	157229	117256	150314
NEG_39657	[M-H]-	Momordin Ic	0.314858	1.43059	0.178601	763.422	11.079					C41H64O13	HWYBGIDROCYPOE-WEAQAMGWSA-N	C[C@]12CC[C@@H](C([C@@H]1CC[C@@]3([C@@H]2CC=C4[C@]3(CC[C@@]5([C@H]4CC(CC5)(C)C)C(=O)O)C)C)(C)C)O[C@H]6[C@@H]([C@H]([C@@H]([C@H](O6)C(=O)O)O)O[C@H]7[C@@H]([C@H]([C@@H](CO7)O)O)O)O	80643.9	46977.7	51799.7	43308.4	35300.2	46808.9
NEG_33781	[M-H]-	Monensin	0.169434	0.496976	0.0418951	669.413	7.224		Lipids and lipid-like molecules	Fatty Acyls	Fatty acids and conjugates	C36H62O11	GAOZTHIDHYLHMS-GDMSFIFLSA-N	CC[C@]1(CC[C@@H](O1)[C@@]2(C)CC[C@]3(C[C@H](O)[C@@H](C)[C@H](O3)[C@H](C)[C@H](OC)[C@@H](C)C(O)=O)O2)[C@H]4O[C@@H](C[C@H]4C)[C@H]5O[C@@](O)(CO)[C@H](C)C[C@@H]5C	14888.6	11244.7	4427.31	22693.5	21588.5	17211.2
NEG_6214	[M-H]-	Morin	1.55122	4.56592	0.417423	301.034	5.925	C10105	Phenylpropanoids and polyketides	Flavonoids	Flavones	C15H10O7	YXOLAZRVSSWPPT-UHFFFAOYSA-N	OC1=CC(=C(C=C1)C2=C(O)C(=O)C3=C(O2)C=C(O)C=C3O)O	2.56017e+06	147633	108696	177259	281849	157745
NEG_12832	[M-H]-	Mulberrin	0.513473	0.73273	0.509672	421.165	4.014		Phenylpropanoids and polyketides	Flavonoids	Flavones	C25H26O6	UWQYBLOHTQWSQD-UHFFFAOYSA-N	CC(C)=CCC1=C2OC(=C(CC=C(C)C)C(=O)C2=C(O)C=C1O)C3=C(O)C=C(O)C=C3	14418	362474	456972	447707	379218	311099
NEG_11147	[M-H]-	Murideoxycholic acid	0.038165	0.358537	0.0482497	391.277	8.081	C15515	Lipids and lipid-like molecules	Steroids and steroid derivatives	Bile acids, alcohols and derivatives	C24H40O4	DGABKXLVXPYZII-PLYQRAMGSA-N	C[C@H](CCC(O)=O)[C@H]1CC[C@H]2[C@@H]3C[C@@H](O)[C@@H]4C[C@H](O)CC[C@]4(C)[C@H]3CC[C@]12C	80.6999	565.563	178.459	939.874	620.268	740.102
NEG_7422	[M-H]-	Mycophenolic acid	0.330937	0.488051	0.0586698	319.118	5.571	C20380	Organoheterocyclic compounds	Isocoumarans	Isobenzofuranones	C17H20O6	HPNSFSBZBAHARI-RUDMXATFSA-N	COC1=C(C\\C=C(C)\\CCC(O)=O)C(=C2C(=O)OCC2=C1C)O	45070.9	53448.8	39763	63433.6	125800	94103
NEG_10897	[M-H]-	Mycophenolic acid IV	0.0372136	0.62495	0.290241	387.185	9.602		Lipids and lipid-like molecules	Prenol lipids	Terpene lactones	C22H28O6	NEGCNVRPGPHOAR-CCLLZULESA-N	COC1=C(C)C2=C(C(=C1CC=C(C)CCC=C(C)CCC(O)=O)O)C(=O)OC2	1277.5	2062.64	421.073	2676.93	1305.1	2036.39
NEG_9493	[M-H]-	Myricanol	8.87152	38.1201	0.377319	357.171	7.364		Phenylpropanoids and polyketides	Diarylheptanoids	Cyclic diarylheptanoids	C21H26O5	SBGBAZQAEOWGFT-UHFFFAOYSA-N	COC1=C(OC)C2=CC(=C1O)CCCCC(O)CCC3=CC2=C(O)C=C3	7.60907e+07	682465	266025	847741	516294	656927
NEG_7252	[M-H]-	Myricetin	1.04758	0.269509	0.191248	317.028	5.149	C10107	Phenylpropanoids and polyketides	Flavonoids	Flavones	C15H10O8	IKMDFBPHZNJCSN-UHFFFAOYSA-N	OC1=CC2=C(C(=C1)O)C(=O)C(=C(O2)C3=CC(=C(O)C(=C3)O)O)O	6379.44	361120	155632	259810	1.19745e+06	483798
NEG_17599	[M-H]-	Myricetin-3-Galactoside	0.41568	0.509481	0.172333	479.083	4.634		Phenylpropanoids and polyketides	Flavonoids	Flavonoid glycosides	C21H20O13	FOHXFLPXBUAOJM-MGMURXEASA-N	OCC1OC(OC2=C(OC3=C(C(=CC(=C3)O)O)C2=O)C4=CC(=C(O)C(=C4)O)O)C(O)C(O)C1O	3792.99	159439	70729.9	155278	158380	145558
NEG_14746	[M-H]-	Myricetin-3-O-beta-D-xylopyranoside	0.200819	1.22573	0.878935	449.073	4.68		Phenylpropanoids and polyketides	Flavonoids	Flavonoid glycosides	C20H18O12	SBEOEJNITMVWLK-CFSKSFDZSA-N	OC1COC(OC2=C(OC3=C(C(=CC(=C3)O)O)C2=O)C4=CC(=C(O)C(=C4)O)O)C(O)C1O	77626.7	2368.72	2516.48	59621.7	4586.46	3108.46
NEG_14745	[M-H]-	Myricetin-3-O-xyloside	0.114164	0.77202	0.62263	449.067	4.408		Phenylpropanoids and polyketides	Flavonoids	Flavonoid glycosides	C20H18O12	SBEOEJNITMVWLK-UHFFFAOYSA-N	OC1COC(OC2=C(OC3=CC(=CC(=C3C2=O)O)O)C4=CC(=C(O)C(=C4)O)O)C(O)C1O	623.304	28651.4	20184.5	24915.1	25463.4	13686
NEG_15990	[M-H]-	Myricitrin	1.89565	0.421476	0.219237	463.085	13.155		Phenylpropanoids and polyketides	Flavonoids	Flavonoid glycosides	C21H20O12	DCYOADKBABEMIQ-OWMUPTOHSA-N	C[C@@H]1O[C@@H](OC2=C(OC3=C(C(=CC(=C3)O)O)C2=O)C4=CC(=C(O)C(=C4)O)O)[C@H](O)[C@H](O)[C@H]1O	597190	1.3878e+06	1.14402e+06	4.34824e+06	1.21256e+06	1.86312e+06
NEG_3005	[M-H]-	Myristic acid	0.363273	0.475871	0.108991	227.201	11.062	C06424	Lipids and lipid-like molecules	Fatty Acyls	Fatty acids and conjugates	C14H28O2	TUNFSRHWOTWDNC-UHFFFAOYSA-N	CCCCCCCCCCCCCC(O)=O	4117.71	89357	80837.2	104458	109238	152605
NEG_2381	[M-H]-	N-Acetyl-L-phenylalanine	0.420147	0.362363	0.113437	206.083	2.894	C03519	Organic acids and derivatives	Carboxylic acids and derivatives	Amino acids, peptides, and analogues	C11H13NO3	CBQJSKKFNMDLON-JTQLQIEISA-N	CC(O)=NC(CC1=CC=CC=C1)C(O)=O	44.8552	86971.9	24588.8	63791.1	119369	124834
NEG_3617	[M-H]-	N-Phenylacetylaspartic acid	0.678408	0.432637	0.158209	250.072	2.964		Organic acids and derivatives	Carboxylic acids and derivatives	Amino acids, peptides, and analogues	C12H13NO5	SVFKZPQPMMZHLZ-UHFFFAOYSA-N	OC(=O)CC(NC(=O)CC1=CC=CC=C1)C(O)=O	25.3147	311616	128869	322164	237014	459021
NEG_43770	[M]-	n-Propionyl coenzyme A	0.0442903	0.734543	0.704496	823.187	9.271	C00100	Lipids and lipid-like molecules	Fatty Acyls	Fatty acyl thioesters	C24H40N7O17P3S	QAQREVBBADEHPA-UXYNFSPESA-N	CCC(=O)SCCNC(=O)CCNC(=O)C(O)C(C)(C)CO[P](O)(=O)O[P](O)(=O)OCC1OC(C(O)C1O[P](O)(O)=O)[N]2C=NC3=C2N=CN=C3N	135.901	4442.04	1296.33	2043.96	4923.85	1029.37
NEG_4500	[M-H]-	Naringenin chalcone	1.68654	4.3404	0.424178	271.062	6.106	C06561	Phenylpropanoids and polyketides	Linear 1,3-diarylpropanoids	Chalcones and dihydrochalcones	C15H12O5	YQHMWTPYORBCMF-ZZXKWVIFSA-N	OC1=CC=C(C=C1)C=CC(=O)C2=C(O)C=C(O)C=C2O	3.05954e+06	148017	154563	259541	196205	318865
NEG_13559	[M-H]-	Naringenin-6-C-glucoside	0.209161	0.577291	0.301853	433.115	4.166		Phenylpropanoids and polyketides	Flavonoids	Flavonoid glycosides	C21H22O10	QKPKGDDHOGIEOO-JVVVWQBKSA-N	OC[C@H]1O[C@H]([C@H](O)[C@@H](O)[C@@H]1O)C2=C(O)C3=C(O[C@@H](CC3=O)C4=CC=C(O)C=C4)C=C2O	111.95	58955.6	30427.7	59725.6	57948.1	37352.6
NEG_17621	[M+FA-H]-	Naringenin-7-O-glucoside	0.0888017	0.491532	0.000499448	479.119	4.89		Phenylpropanoids and polyketides	Flavonoids	Flavonoid glycosides	C21H22O10	DLIKSSGEMUFQOK-RGHIGTIISA-N	OCC1OC(OC2=CC(=C3C(=O)CC(OC3=C2)C4=CC=C(O)C=C4)O)C(O)C(O)C1O	2907.64	2678.94	2299.76	5508.05	4959.48	5576.88
NEG_2661	[M-H]-	Nepodin	0.185193	0.546345	0.124356	215.07	4.777					C13H12O3	DMLHPCALHMPJHS-UHFFFAOYSA-N	CC1=CC2=C(C(=CC=C2)O)C(=C1C(=O)C)O	22872.9	21015.8	7137.54	30331.2	22337.3	40727
NEG_9847	[M-H]-	Nervonic acid	0.213355	0.80387	0.764418	365.34	12.844	C08323	Lipids and lipid-like molecules	Fatty Acyls	Fatty acids and conjugates	C24H46O2	GWHCXVQVJPWHRF-KTKRTIGZSA-N	CCCCCCCCC=CCCCCCCCCCCCCCC(O)=O	13.0301	79691.7	45645	13096.7	88657.9	54178.1
NEG_4634	[M-H]-	Nimbidiol	0.321831	0.291569	0.0163041	273.147	9.322		Lipids and lipid-like molecules	Prenol lipids	Diterpenoids	C17H22O3	JMBKXUYCBVKSSY-OMOCHNIRSA-N	CC1(C)CCCC2(C)C1CC(=O)C3=CC(=C(O)C=C23)O	866.044	21785.1	20916.7	48254.7	40937.1	60234
NEG_9010	[M+FA-H]-	Nordihydroguaiaretic acid	0.136277	0.954587	0.803825	347.148	7.577		Lignans, neolignans and related compounds	Dibenzylbutane lignans		C18H22O4	HCZKYJDFEPMADG-UHFFFAOYSA-N	CC(CC1=CC(=C(O)C=C1)O)C(C)CC2=CC(=C(O)C=C2)O	38714.5	36510.6	38246.3	52414.1	29504.3	36951.4
NEG_2034	[M-H]-	Noreugenin	0.327391	14.0599	0.391799	191.032	5.478					C10H8O4	NCUJRUDLFCGVOE-UHFFFAOYSA-N	CC1=CC(=O)C2=C(C=C(C=C2O1)O)O	106425	963.576	1326.48	2153.84	2491.48	3087
NEG_29794	[M-H]-	Novobiocin	0.185116	0.696019	0.477293	611.223	7.424	C05080	Phenylpropanoids and polyketides	Coumarins and derivatives	Coumarin glycosides	C31H36N2O11	YJQPYGGHQPGBLI-KGSXXDOSSA-N	CO[C@@H]1[C@@H](OC(N)=O)[C@@H](O)[C@H](OC2=CC=C3C(=C(NC(=O)C4=CC(=C(O)C=C4)CC=C(C)C)C(=O)OC3=C2C)O)OC1(C)C	7449.08	83935.3	33187.7	70404.6	51579.3	56994
NEG_25581	[M-H]-	NP-000062(6)	0.0317251	0.393665	0.318875	563.142	1.144					C26H28O14	DRLZZQRQMWQRLZ-UHFFFAOYNA-N	O=C1C=C(OC2=C1C(O)=C(C(O)=C2C3OC(CO)C(O)C(O)C3O)C4OC(CO)C(O)C4O)C=5C=CC(O)=CC5	0	682.428	479.821	783.426	1904.63	264.332
NEG_5004	[M-H]-	Obtusifolin	0.337743	5.15647	0.0217521	283.061	5.746		Benzenoids	Anthracenes	Anthraquinones		NYRXUBDGDSRBGB-UHFFFAOYSA-N	COC1=C(O)C(=CC2=C1C(=O)C3=C(C=CC=C3O)C2=O)C	35618.9	44940.6	20842.4	1477	8837.72	9350.25
NEG_13003	[M-H]-	Octacosanoic acid	0.0491333	1.09486	0.842875	423.416	14.34		Lipids and lipid-like molecules	Fatty Acyls	Fatty acids and conjugates	C28H56O2	UTOPWMOLSKOLTQ-UHFFFAOYSA-N	CCCCCCCCCCCCCCCCCCCCCCCCCCCC(O)=O	1284.22	2985.1	3177.49	1215.09	3883.01	1703.52
NEG_7000	[M-H]-	Octadecanedioic acid	0.2088	1.28012	0.763394	313.236	10.275		Lipids and lipid-like molecules	Fatty Acyls	Fatty acids and conjugates	C18H34O4	BNJOQKFENDDGSC-UHFFFAOYSA-N	OC(=O)CCCCCCCCCCCCCCCCC(O)=O	305.738	91445.6	28535.6	24380.7	38072.9	31511.7
NEG_4929	[M-H]-	Octyl gallate	0.655881	0.374094	0.123607	281.139	3.856					C15H22O5	NRPKURNSADTHLJ-UHFFFAOYSA-N	CCCCCCCCOC(=O)C1=CC(=C(C(=C1)O)O)O	448.649	211561	107563	225108	207950	421200
NEG_15157	[M-H]-	Oleanonic acid	0.0669405	1.27107	0.496096	453.332	10.877					C30H46O3	FMIMFCRXYXVFTA-FUAOEXFOSA-N	C[C@]12CCC(=O)C([C@@H]1CC[C@@]3([C@@H]2CC=C4[C@]3(CC[C@@]5([C@H]4CC(CC5)(C)C)C(=O)O)C)C)(C)C	4528.42	5087.32	2233.96	1716.86	4065.32	3540.41
NEG_4946	[M-H]-	Oleic acid	0.16241	1.22464	0.552372	281.246	14.075	C00712	Lipids and lipid-like molecules	Fatty Acyls	Fatty acids and conjugates	C18H34O2	ZQPPMHVWECSIRJ-KTKRTIGZSA-N	CCCCCCCCC=CCCCCCCCC(O)=O	32561.4	17856.5	26643.8	14753.4	32740.8	15431.7
NEG_4994	[M-H]-	Oroxylin A	0.174971	0.727389	0.321961	283.056	7.584		Phenylpropanoids and polyketides	Flavonoids	O-methylated flavonoids	C16H12O5	LKOJGSWUMISDOF-UHFFFAOYSA-N	COC1=C(O)C=C2OC(=CC(=O)C2=C1O)C3=CC=CC=C3	30627.7	81380.1	53642.2	77033.4	56352.6	94346.4
NEG_1280	[M-H]-	Orsellinic acid	0.379458	0.427509	0.0933501	167.031	2.884	C01839	Benzenoids	Benzene and substituted derivatives	Benzoic acids and derivatives	C8H8O4	AMKYESDOVDKZKV-UHFFFAOYSA-N	CC1=C(C(O)=O)C(=CC(=C1)O)O	2432.27	83584.9	43665.2	89820	125404	88120.1
NEG_11783	[M-H]-	Osajin	0.382719	0.279577	0.0286581	403.153	6.381	C10511	Phenylpropanoids and polyketides	Isoflavonoids	Isoflavans	C25H24O5	DCTLJGWMHPGCOS-UHFFFAOYSA-N	CC(C)=CCC1=C(O)C2=C(OC=C(C2=O)C3=CC=C(O)C=C3)C4=C1OC(C)(C)C=C4	3140.1	34621.8	21017.1	54789.5	93792.3	61660.9
NEG_5202	[M-H]-	Oxazepam	0.0777044	0.78834	0.476722	285.04	5.654	C07359	Organoheterocyclic compounds	Benzodiazepines	1,4-benzodiazepines	C15H11ClN2O2	ADIMAYPTOBDMTL-UHFFFAOYSA-N	OC1N=C(C2=CC=CC=C2)C3=C(C=CC(=C3)Cl)N=C1O	18841.3	10542.9	5393.1	15915.1	13767.9	14431.6
NEG_880	[M-H]-	p-Coumaraldehyde	0.160894	0.138514	0.0763959	147.044	4.494		Phenylpropanoids and polyketides	Cinnamaldehydes		C9H8O2	CJXMVKYNVIGQBS-UHFFFAOYSA-N	OC1=CC=C(C=CC=O)C=C1	119.507	2771.17	1881.04	3378.3	14557.1	16514
NEG_22323	[M-H]-	Pachymic acid	0.212611	0.977345	0.979133	527.367	12.052					C33H52O5	VDYCLYGKCGVBHN-DRCQUEPLSA-N	CC(C)C(=C)CC[C@H]([C@H]1[C@@H](C[C@@]2([C@@]1(CCC3=C2CC[C@@H]4[C@@]3(CC[C@@H](C4(C)C)OC(=O)C)C)C)C)O)C(=O)O	1227.2	88980.7	23039.4	8588.25	67868.3	39415.8
NEG_3838	[M-H]-	Palmitic acid	0.36853	0.916806	0.786822	255.23	13.154	C00249	Lipids and lipid-like molecules	Fatty Acyls	Fatty acids and conjugates	C16H32O2	IPCSVZSSVZVIGE-UHFFFAOYSA-N	CCCCCCCCCCCCCCCC(O)=O	460119	230061	210444	416517	245481	320351
NEG_3764	[M-H]-	Palmitoleic acid	0.577219	2.86297	0.471909	253.218	11.357		Lipids and lipid-like molecules	Fatty Acyls	Fatty acids and conjugates	C16H30O2	SECPZKHBENQXJG-FPLPWBNLSA-N	CCCCCCC=CCCCCCCCC(O)=O	394722	33732.7	21804.6	41512.3	36966.9	78791.2
NEG_32247	[M+Cl]-	Panasenoside	0.110195	0.469521	0.295756	645.117	3.758		Phenylpropanoids and polyketides	Flavonoids	Flavonoid glycosides	C27H30O16	LKZDFKLGDGSGEO-UHFFFAOYSA-N	OCC1OC(OC2C(O)C(O)C(CO)OC2OC3=C(OC4=C(C(=CC(=C4)O)O)C3=O)C5=CC=C(O)C=C5)C(O)C(O)C1O	215.199	11127.2	5017.29	9982.91	19282.4	5578.03
NEG_36752	[M-H]-	PE 34:1	0.544379	0.570025	0.666898	716.527	13.59					C39H76NO8P	FHQVHHIBKUMWTI-ZCXUNETKSA-N		87.2044	341790	428221	23669.9	1.24252e+06	84804.4
NEG_36630	[M-H]-	PE 34:2	0.312649	4.3365	0.284967	714.509	13.488					C39H74NO8P	HBZNVZIRJWODIB-BCTRXSSUSA-N		81307.6	20692.5	9406.9	735.299	20775.7	4179.55
NEG_36503	[M-H]-	PE 34:3	0.625011	0.988758	0.987297	712.493	13.004					C39H72NO8P	QONZHKTZKTUIMU-SVNQLWEDSA-N	CC/C=C\C/C=C\C/C=C\CCCCCCCC(=O)OC(COC(=O)CCCCCCCCCCCCCCC)COP(=O)(O)OCCN	7912.31	516263	488913	105626	634577	284405
NEG_37471	[M-H]-	PE 35:2	0.142506	0.995883	0.996523	728.52	13.481					C40H76NO8P	UJCJWIHZUHMDIT-OHNCOSGTSA-N		2105.11	21481.9	36430.8	5041.32	49724.7	5500
NEG_38296	[M-H]-	PE 36:2	0.383563	1.70563	0.473645	742.533	12.656					C41H78NO8P	MWRBNPKJOOWZPW-CLFAGFIQSA-N	CCCCCCCC/C=C\CCCCCCCC(=O)OCC(COP(=O)(O)OCCN)OC(=O)CCCCCCC/C=C\CCCCCCCC	8632.52	158075	84581.9	39134.1	64668.6	43527.1
NEG_38164	[M-H]-	PE 36:3	0.325666	1.1162	0.862904	740.517	12.484					C41H76NO8P	GKAFCSRKMWFPSJ-RQOIEFAZSA-N		50019.4	390050	115465	185681	148377	163642
NEG_38032	[M-H]-	PE 36:4	0.619881	15.0541	0.371541	738.506	12.452					C41H74NO8P	SSCDRSKJTAQNNB-MAZCIEHSSA-N		369317	10807.5	7746.09	5539.54	6946.56	13279
NEG_35461	[M-H]-	Pedunculoside	0.22874	1.81241	0.601123	695.395	7.306					C36H58O10	LARPFJIXBULVPK-FBAXZNBGSA-N	C[C@@H]1CC[C@@]2(CC[C@@]3(C(=CC[C@H]4[C@]3(CC[C@@H]5[C@@]4(CC[C@@H]([C@@]5(C)CO)O)C)C)[C@@H]2[C@]1(C)O)C)C(=O)O[C@H]6[C@@H]([C@H]([C@@H]([C@H](O6)CO)O)O)O	76256.4	10398.6	4478.18	11013.5	30546.9	8722.52
NEG_1083	[M-H]-	Pelargonic acid	0.260282	1.07377	0.81728	157.122	12.535	C01601	Lipids and lipid-like molecules	Fatty Acyls	Fatty acids and conjugates	C9H18O2	FBUKVWPVBMHYJY-UHFFFAOYSA-N	CCCCCCCCC(O)=O	36202	67428.3	92994.1	56367.9	50178.2	76569.1
NEG_7809	[M-H]-	Pencycuron	0.294224	0.754686	0.582007	327.13	1.142		Benzenoids	Benzene and substituted derivatives	Halobenzenes	C19H21ClN2O	OGYFATSSENRIKG-UHFFFAOYSA-N	ClC1=CC=C(CN(C2CCCC2)C(=O)NC3=CC=CC=C3)C=C1	7.52503	163645	121063	157885	109454	109925
NEG_10620	[M-H]-	Pentacosanoic acid	0.234061	0.942446	0.937894	381.371	13.453		Lipids and lipid-like molecules	Fatty Acyls	Fatty acids and conjugates	C25H50O2	MWMPEAHGUXCSMY-UHFFFAOYSA-N	CCCCCCCCCCCCCCCCCCCCCCCCC(O)=O	1006.01	61389.5	95999.2	21092.4	109667	37308.3
NEG_3405	[M-H]-	Pentadecanoic acid	0.347944	63.1746	0.370893	241.214	11.488	C16537	Lipids and lipid-like molecules	Fatty Acyls	Fatty acids and conjugates	C15H30O2	WQEPLUUGTLDZJY-UHFFFAOYSA-N	CCCCCCCCCCCCCCC(O)=O	115500	1057.45	718.163	884.508	538.472	433.393
NEG_13061	[M+HCOO]-	Pentose-Hexose + C5H9	0.1703	0.778366	0.26958	425.164	3.769		Lipids and lipid-like molecules	Fatty Acyls	Fatty acyl glycosides	C16H28O10	NYSQQJIJJJAWCE-UHFFFAOYSA-N	CC(C)=CCOC1OC(COC2OCC(O)C(O)C2O)C(O)C(O)C1O	109615	84608.7	47910.2	102512	105719	102848
NEG_34518	[M-H]-	Peonidin 3-(6''-acetyl)glucoside	0.163846	0.581614	0.464385	681.179	7.593		Lignans, neolignans and related compounds	Lignan glycosides		C32H42O16	ZJSJQWDXAYNLNS-FUPWJLLWSA-N	COC1=CC(=CC=C1OC2OC(CO)C(O)C(O)C2O)C3OCC4C3COC4C5=CC=C(OC6OC(CO)C(O)C(O)C6O)C(=C5)OC	1130.48	51665.8	4273.78	37801.1	23886.2	36436.4
NEG_11019	[M-H]-	Periplogenin	0.281845	0.393045	0.0425629	389.228	8.772					C23H34O5	QJPCKAJTLHDNCS-FBAXFMHRSA-N	C[C@]12CC[C@@H](C[C@]1(CC[C@@H]3[C@@H]2CC[C@]4([C@@]3(CC[C@@H]4C5=CC(=O)OC5)O)C)O)O	5609.83	33453.5	14683.2	40627.7	41250.8	54865.3
NEG_17399	[M-2H]-	Petunidin 3-galactoside	0.703322	10.5567	0.368174	477.103	4.092		Phenylpropanoids and polyketides	Flavonoids	Flavonoid glycosides	C22H23O12	CCQDWIRWKWIUKK-UHFFFAOYNA-O	COC1=CC(=CC(=C1O)O)C2=C(OC3OC(CO)C(O)C(O)C3O)C=C4C(=CC(=CC4=[O+]2)O)O	476347	23641.6	13289.5	10851.1	7026.55	30743.3
NEG_3991	[M-H]-	Peucenin	0.350884	0.54122	0.205236	259.097	6.078		Organoheterocyclic compounds	Benzopyrans	1-benzopyrans	C15H16O4	DTNGBIGBPPPNNB-UHFFFAOYSA-N	CC(C)=CCC1=C(O)C=C2OC(=CC(=O)C2=C1O)C	5505.9	121520	114742	128851	119076	198782
NEG_35346	[M-H]-	PG 30:0	3.97081	2.31605	0.321787	693.454	12.447					C36H71O10P	ZAXBYLHGBBMAAY-UHFFFAOYSA-N		60345.1	8.25034e+06	9.92989e+06	2.83069e+06	2.90651e+06	2.13852e+06
NEG_36964	[M-H]-	PG 32:1	0.273854	0.985212	0.983195	719.485	12.732					C38H73O10P	NOFOTAHTYLXZNV-PEZBUJJGSA-N	CCCCCCCCCCCCCCCC(=O)OCC(COP(=O)(O)OCC(CO)O)OC(=O)CCCCCCC/C=C\CCCCCC	2669.58	69814.1	132527	44043.7	121865	42178.9
NEG_38700	[M-H]-	PG 34:0	0.283691	1.0414	0.966932	749.535	13.26					C40H79O10P	KBPVYRBBONZJHF-UHFFFAOYSA-N		205.203	80557.4	118914	6405.3	160810	24523.9
NEG_38591	[M-H]-	PG 34:1	0.530225	3.31645	0.127283	747.519	13.064					C40H77O10P	PAZGBAOHGQRCBP-ZCXUNETKSA-N	CCCCCCCC/C=C\CCCCCCCC(=O)OC(COC(=O)CCCCCCCCCCCCCCC)COP(=O)(O)OCC(CO)O	122364	38437.9	125523	4512.91	68034.2	13787.4
NEG_38496	[M-H]-	PG 34:2	1.12351	1.38746	0.681226	745.506	12.754					C40H75O10P	ATBOMIWRCZXYSZ-BCTRXSSUSA-N	CCCCC/C=C\C/C=C\CCCCCCCC(=O)OC(COC(=O)CCCCCCCCCCCCCCC)COP(=O)(O)OCC(CO)O	26059.2	1.0661e+06	1.18143e+06	255682	1.15948e+06	223507
NEG_38389	[M-H]-	PG 34:3	0.247975	13.0859	0.301785	743.488	12.68					C40H73O10P	PTJBFPPEYDFAAQ-RUGCENDASA-N	CCCCC/C=C\C/C=C\CCCCCCCC(=O)OC(COC(=O)CCCCCCC/C=C\CCCCCC)COP(=O)(O)OCC(CO)O	53435.3	6767.52	2538.7	1767.45	1367.42	1659.72
NEG_40586	[M-H]-	PG 36:1	0.530645	2.61762	0.348733	775.543	13.271					C42H81O10P	ZEFGRNLJASLRBZ-ZZEZOPTASA-N	CCCCCCCCCCCCCCCCCC(=O)OCC(COP(=O)(O)OCC(CO)O)OC(=O)CCCCCCC/C=C\CCCCCCCC	351.219	182893	136682	4932.16	98863.9	18424
NEG_40455	[M-H]-	PG 36:2	0.361399	2.26888	0.389863	773.528	12.928					C42H79O10P	DSNRWDQKZIEDDB-CLFAGFIQSA-N	CCCCCCCC/C=C\CCCCCCCC(=O)OCC(COP(=O)(O)OCC(CO)O)OC(=O)CCCCCCC/C=C\CCCCCCCC	919.856	112923	61509.4	15531	46093	15662.2
NEG_40287	[M-H]-	PG 36:3	0.574488	3.08926	0.250719	771.52	12.845					C42H77O10P	FSVTVWTVWNNIQX-RQOIEFAZSA-N	CCCCCCCC/C=C\CCCCCCCC(=O)OCC(COP(=O)(O)OCC(CO)O)OC(=O)CCCCCCC/C=C\C/C=C\CCCCC	13856.5	130644	185956	419.524	77648.9	28901.1
NEG_40115	[M-H]-	PG 36:4	0.310893	0.537565	0.266573	769.502	12.545					C42H75O10P	AKWGRDPPGYFWIW-MAZCIEHSSA-N		24828.4	114333	101496	58055	191942	197685
NEG_98	[M-C6H10O4-H]-	Phenol	0.60056	0.899533	0.866375	93.035	3.091	C15584	Benzenoids	Phenols	1-hydroxy-4-unsubstituted benzenoids	C6H6O	ISWSIDIOOBJBQZ-UHFFFAOYSA-N	OC1=CC=CC=C1	777.068	1.03908e+06	443454	636282	591734	420968
NEG_648	[M-H]-	Phenylacetic acid	0.341425	0.217329	0.0539308	135.045	2.789	C07086	Benzenoids	Benzene and substituted derivatives		C8H8O2	WLJVXDMOQOGPHL-UHFFFAOYSA-N	OC(=O)CC1=CC=CC=C1	137.847	23606.2	7037.65	69450.1	29436.9	42749.1
NEG_1212	[M-H]-	Phenylalanine	0.794963	0.2152	0.453131	164.07	2.214	C00079	Organic acids and derivatives	Carboxylic acids and derivatives	Amino acids, peptides, and analogues	C9H11NO2	COLNVLDHVKWLRT-QMMMGPOBSA-N	NC(CC1=CC=CC=C1)C(O)=O	162840	12843.4	6998.98	808139	15364.1	25391.9
NEG_6658	[M-H]-	Phenylbutazone	0.148489	0.257026	0.460335	307.139	3.999	C07440	Benzenoids	Benzene and substituted derivatives		C19H20N2O2	VYMDGNCVAMGZFE-UHFFFAOYSA-N	CCCCC1C(=O)N(N(C1=O)C2=CC=CC=C2)C3=CC=CC=C3	16321	393.12	459.971	4533.59	914.225	61370.7
NEG_1190	[M-H]-	Phenylpyruvic acid	0.743905	49.5957	0.378072	163.038	4.061	C00166	Benzenoids	Benzene and substituted derivatives	Phenylpyruvic acid derivatives	C9H8O3	BTNMPGBKDVTSJY-UHFFFAOYSA-N	OC(=O)C(=O)CC1=CC=CC=C1	534320	1637.99	2168.03	5284.46	2520.53	3045.25
NEG_22780	[M-H]-	Phillyrin	0.0863123	0.74698	0.0374949	533.198	5.546					C27H34O11	KFFCKOBAHMGTMW-UHFFFAOYNA-N	OCC1OC(OC2=CC=C(C=C2OC)C3OCC4C(OCC34)C5=CC=C(OC)C(OC)=C5)C(O)C(O)C1O	22006.4	28729	23657.2	32191.4	36783.1	30616.7
NEG_4613	[M-H]-	Phloretin	0.268856	0.723554	0.382304	273.075	6.104	C00774	Phenylpropanoids and polyketides	Linear 1,3-diarylpropanoids	Chalcones and dihydrochalcones	C15H14O5	VGEREEWJJVICBM-UHFFFAOYSA-N	OC1=CC=C(CCC(=O)C2=C(O)C=C(O)C=C2O)C=C1	37557.1	172324	103164	164575	123727	144348
NEG_13737	[M-H]-	Phlorizin	0.130196	0.473795	0.211876	435.211	8.581	C01604	Phenylpropanoids and polyketides	Flavonoids	Flavonoid glycosides	C21H24O10	IOUVKUPGCMBWBT-QNDFHXLGSA-N	OCC1OC(OC2=CC(=CC(=C2C(=O)CCC3=CC=C(O)C=C3)O)O)C(O)C(O)C1O	8143.37	8548.91	6555.52	15882.4	6613.76	26571.1
NEG_44524	[M-H]-	PI 34:1	0.45009	2.33059	0.253957	835.516	12.261					C43H81O13P	PDLAMJKMOKWLAJ-ZCXUNETKSA-N		173305	74377.5	38144.7	28596.1	45613.5	48432.1
NEG_44390	[M-H]-	PI 34:2	2.4952	1.32976	0.698525	833.517	12.658					C43H79O13P	BSNJSZUDOMPYIR-BCTRXSSUSA-N	CCCCC/C=C\C/C=C\CCCCCCCC(=O)OC(COC(=O)CCCCCCCCCCCCCCC)COP(=O)(O)OC1C(C(C(C(C1O)O)O)O)O	87318.5	4.60837e+06	6.37157e+06	1.06143e+06	4.96369e+06	2.29765e+06
NEG_45210	[M-H]-	PI 35:2	0.591932	0.93487	0.892669	847.509	12.086					C44H81O13P	AJAKJCJJRMUWFW-OHNCOSGTSA-N		14793	473742	523348	350500	404596	327283
NEG_45946	[M-H]-	PI 36:2	0.040894	0.51716	0.219329	861.547	13.036					C45H83O13P	KZVRAFHIKMDULK-MLWYYCKJSA-N		1700.06	715.133	1056.57	2859.01	2982.69	871.431
NEG_45641	[M-H]-	PI 36:5	0.193077	1.72624	0.347221	855.492	12					C45H77O13P	FQGSWQFJOVVRRB-LPHKCNJWSA-N		40290	15844.2	11851.2	15026.5	11161.3	13195.7
NEG_3800	[M-H]-	Pinocembrin	0.455097	0.480282	0.131355	255.063	6.868	C09827	Phenylpropanoids and polyketides	Flavonoids	Flavans	C15H12O4	URFCJEUYXNAHFI-ZDUSSCGKSA-N	OC1=CC(=C2C(=O)C[C@H](OC2=C1)C3=CC=CC=C3)O	7070.84	139920	96322.6	208195	122649	175760
NEG_21332	[M-H]-	Pinoresinol 4-O-glucoside	0.0807141	0.897645	0.756452	519.181	4.899					C26H32O11	QLJNETOQFQXTLI-ZXMSAYDFSA-N	COC1=C(C=CC(=C1)[C@@H]2[C@@H]3CO[C@H]([C@H]3CO2)C4=CC(=C(C=C4)O[C@@H]5[C@@H]([C@@H]([C@@H]([C@H](O5)CO)O)O)O)OC)O	24735.4	17599.6	11646.9	12029.7	28885	19222.6
NEG_8505	[M-H]-	Polychrom	0.0369084	0.650805	0.601285	339.075	1.179	C09264	Phenylpropanoids and polyketides	Coumarins and derivatives	Coumarin glycosides	C15H16O9	XHCADAYNFIFUHF-UHFFFAOYSA-N	OCC1OC(OC2=C(O)C=C3OC(=O)C=CC3=C2)C(O)C(O)C1O	2337.8	1027.08	416.819	729.655	4030.17	1050.99
NEG_18385	[M-H]-	Polygalic acid	0.126707	1.43661	0.442978	487.311	12.741					C29H44O6	VZRKWGPIZJDNHC-RFBWYFLRSA-N	C[C@@]12CCC3[C@@](C1CCC4=C2CC[C@@]5(C4CC(CC5)(C)C)C(=O)O)(C[C@@H]([C@@H]([C@@]3(C)C(=O)O)O)O)C	3850.68	11677.5	13513.6	9144.54	3249.2	7821.71
NEG_19330	[M-H]-	Poricoic acid A	0.0588996	0.837344	0.779924	497.32	10.589					C31H46O5	KVAQLXUMUVEKGR-SMFZDKLCSA-N	CC(C)C(=C)CC[C@H]([C@H]1[C@@H](C[C@@]2([C@@]1(CC=C3C2=CC[C@H]([C@]3(C)CCC(=O)O)C(=C)C)C)C)O)C(=O)O	2803.2	9819.29	5190.63	13429.9	2571.72	5271.79
NEG_6908	[M-H]-	Porphyrillic acid	0.200872	85.3001	0.37753	313.041	4.818		Organoheterocyclic compounds	Benzofurans	Dibenzofurans	C16H10O7	QZYZPZAPRHESDA-UHFFFAOYSA-N	CC1=CC(=C2C(=C1C(O)=O)OC3=C2C4=C(C(=C3)O)C(=O)OC4)O	0	60383	134.637	200.1	234.9	274.468
NEG_3336	[M-H2O-H]-	Primuliten	0.403255	0.407759	0.0801235	239.129	6.737		Phenylpropanoids and polyketides	Flavonoids	Flavones	C15H10O3	IYBLVRRCNVHZQJ-UHFFFAOYSA-N	OC1=CC=CC2=C1C(=O)C=C(O2)C3=CC=CC=C3	3800.06	76638.1	56981.2	143736	113475	79800.5
NEG_16154	[M-H]-	Pristimerin	2.76779	7.92684	0.415151	463.285	10.269		Lipids and lipid-like molecules	Prenol lipids	Triterpenoids	C30H40O4	JFACETXYABVHFD-WXPPGMDDSA-N	COC(=O)C1(C)CCC2(C)CCC3(C)C4=CC=C5C(=C(O)C(=O)C=C5C4(C)CCC3(C)C2C1)C	7.94076e+06	138959	71603.5	131789	523129	373402
NEG_26917	[M-H]-	Procyanidin B2	0.397486	0.300366	0.0350915	577.138	3.09	C17639	Phenylpropanoids and polyketides	Flavonoids	Biflavonoids and polyflavonoids	C30H26O12	XFZJEEAOWLFHDH-NFJBMHMQSA-N	O[C@@H]1CC2=C(O[C@@H]1C3=CC(=C(O)C=C3)O)C(=C(O)C=C2O)[C@@H]4[C@@H](O)[C@H](OC5=CC(=CC(=C45)O)O)C6=CC(=C(O)C=C6)O	2991.53	41771.8	29151.7	72579.7	110173	63330.2
NEG_20086	[M-H]-	Protohypericin	0.084275	0.45	0.423117	505.093	13.286					C30H18O8	DPKVSJZTYNGFAW-UHFFFAOYSA-N	CC1=CC(=O)C2=C(C3=C(C=C(C4=C3C(=C5C6=CC(=CC(=O)C6=C(C7=C(C=C(C4=C57)O)O)O)C)C2=C1)O)O)O	5060.93	350.519	515.548	8211.8	500.092	4459.23
NEG_4890	[M-H]-	Pseudobaptigenin	0.0430557	0.505666	0.170553	281.044	6.79	C10522	Phenylpropanoids and polyketides	Isoflavonoids	Isoflav-2-enes	C16H10O5	KNJNBKINYHZUGC-UHFFFAOYSA-N	OC1=CC2=C(C=C1)C(=O)C(=CO2)C3=CC=C4OCOC4=C3	412.329	1493.46	784.798	1107.89	2547.42	1665.57
NEG_8330	[M-H]-	Psoralidin	0.0605361	0.848272	0.750714	335.094	1.142	C10523	Phenylpropanoids and polyketides	Isoflavonoids	Coumestans	C20H16O5	YABIJLLNNFURIJ-UHFFFAOYSA-N	CC(C)=CCC1=C(O)C=C2OC(=O)C3=C(OC4=C3C=CC(=C4)O)C2=C1	1052.65	11832.8	5487.21	8625.99	6031.58	7001.33
NEG_12406	[M-H]-	Puerarin	0.181303	0.569117	0.0046393	415.1	4.371	C10524	Phenylpropanoids and polyketides	Isoflavonoids	Isoflavonoid C-glycosides	C21H20O9	HKEAFJYKMMKDOR-VPRICQMDSA-N	OC[C@H]1O[C@H]([C@H](O)[C@@H](O)[C@@H]1O)C2=C3OC=C(C(=O)C3=CC=C2O)C4=CC=C(O)C=C4	20061.3	16591.1	14473.4	26835.7	31202.6	31795.3
NEG_18424	[M-H]-	Pygenic acid b	1.17148	0.972044	0.979399	487.356	13.239		Lipids and lipid-like molecules	Prenol lipids	Triterpenoids	C30H48O5	JXSVIVRDWWRQRT-VULHWTOISA-N	C[C@@H]1CC[C@@]2(CC[C@]3(C)C(=CC[C@@H]4[C@@]5(C)CC(O)C(O)C(C)(CO)C5CC[C@@]34C)[C@@H]2[C@H]1C)C(O)=O	2815.63	2.11359e+06	887893	49089.7	2.72564e+06	315975
NEG_1270	[M-H]-	Pyridoxal	0.356727	0.524219	0.173643	166.05	6.409	C00250	Organoheterocyclic compounds	Pyridines and derivatives	Pyridine carboxaldehydes	C8H9NO3	RADKZDMFGJYCBB-UHFFFAOYSA-N	CC1=C(O)C(=C(CO)C=N1)C=O	2075.5	119407	90781.4	112692	125811	166411
NEG_85	[M-H]-	Pyruvic acid	0.487227	0.492147	0.174271	87.0079	1.108	C00022	Organic acids and derivatives	Keto acids and derivatives	Alpha-keto acids and derivatives	C3H4O3	LCTONWCANYUPML-UHFFFAOYSA-N	CC(=O)C(O)=O	66.7852	144105	331337	275220	329997	360976
NEG_4493	[2M-H]-	Quercetin	0.373529	0.934542	0.923925	271.059	4.885	C00389	Phenylpropanoids and polyketides	Flavonoids	Flavones	C15H10O7	REFJWTPEDVJJIY-UHFFFAOYSA-N	OC1=CC2=C(C(=C1)O)C(=O)C(=C(O2)C3=CC(=C(O)C=C3)O)O	333651	27757.9	70717.7	144632	113487	204275
NEG_38996	[M-H]-	Quercetin 3-O-[2''-O-(6'''-O-p-coumaroyl)-b-D-glucopyranosyl]-a-L-rhamnopyranoside	0.0217692	0.618578	0.00261669	755.163	4.213					C36H36O18	LSMKTLJKBSXMMR-UHFFFAOYNA-N	CC1C(C(C(C(O1)OC2=C(OC3=CC(=CC(=C3C2=O)O)O)C4=CC(=C(C=C4)O)O)OC5C(C(C(C(O5)COC(=O)/C=C/C6=CC=C(C=C6)O)O)O)O)O)O	532.615	413.764	549.13	819.225	827.011	771.42
NEG_14552	[M-H]-	Quercetin 3-O-alpha-L-rhamnoside	0.254513	2.64583	0.443497	447.094	8.171		Phenylpropanoids and polyketides	Flavonoids	Flavonoid glycosides	C21H20O11	OXGUCUVFOIWWQJ-UHFFFAOYSA-N	CC1OC(OC2=C(OC3=C(C(=CC(=C3)O)O)C2=O)C4=CC(=C(O)C=C4)O)C(O)C(O)C1O	76474.8	10326.6	6897.55	15710.8	14319	5384.11
NEG_17383	[M-H]-	Quercetin 3-O-glucuronide	0.416484	2.35183	0.34151	477.069	4.54		Phenylpropanoids and polyketides	Flavonoids	Flavonoid glycosides	C21H18O13	DUBCCGAQYVUYEU-ZUGPOPFOSA-N	O[C@@H]1[C@@H](O)[C@@H](O[C@@H]([C@H]1O)C(O)=O)OC2=C(OC3=C(C(=CC(=C3)O)O)C2=O)C4=CC(=C(O)C=C4)O	167606	35654.8	40192.1	33433	34978.9	35104.5
NEG_32866	[M+FA-H]-	Quercetin 3-O-rhamnoside-7-O-glucoside	0.0794445	0.416914	0.0893336	655.154	3.772		Phenylpropanoids and polyketides	Flavonoids	Flavonoid glycosides	C27H30O16	MCTZMXCUYPDYNE-AHHFARBASA-N	C[C@@H]1O[C@@H](OC2=C(OC3=CC(=CC(=C3C2=O)O)O[C@@H]4O[C@H](CO)[C@@H](O)[C@H](O)[C@H]4O)C5=CC(=C(O)C=C5)O)[C@H](O)[C@H](O)[C@H]1O	843.042	3318.59	921.993	4037.08	5261.25	2895.14
NEG_30949	[M-H]-	Quercetin 3-O-sophoroside	0.107458	0.93798	0.88431	625.143	4.561		Phenylpropanoids and polyketides	Flavonoids	Flavonoid glycosides		RDUAJIJVNHKTQC-UJECXLDQSA-N	OCC1OC(OC2C(O)C(O)C(CO)OC2OC3=C(OC4=C(C(=CC(=C4)O)O)C3=O)C5=CC(=C(O)C=C5)O)C(O)C(O)C1O	3087.92	21629	18633.9	17993.2	17253.3	10970.7
NEG_30955	[M-H]-	Quercetin-3,4'-O-di-beta-glucoside	0.295898	0.435037	0.113991	625.15	4.812					C27H30O17	RPVIQWDFJPYNJM-UHFFFAOYNA-N	O=C1C(OC2OC(CO)C(O)C(O)C2O)=C(OC=3C=C(O)C=C(O)C13)C=4C=CC(OC5OC(CO)C(O)C(O)C5O)=C(O)C4	0	56076.6	23198.2	57012.2	54562.1	70651.1
NEG_14507	[M-H]-	Quercitrin	0.530565	0.62576	0.28462	447.088	13.563	C01750	Phenylpropanoids and polyketides	Flavonoids	Flavonoid glycosides	C21H20O11	OXGUCUVFOIWWQJ-HQBVPOQASA-N	CC1OC(OC2=C(OC3=C(C(=CC(=C3)O)O)C2=O)C4=CC(=C(O)C=C4)O)C(O)C(O)C1O	143199	399688	203896	531794	220337	441269
NEG_18213	[M-H]-	Quillaic acid	0.431916	7.49088	0.377072	485.322	8.882	C08972	Lipids and lipid-like molecules	Prenol lipids	Triterpenoids	C30H46O5	MQUFAARYGOUYEV-UAWZMHPWSA-N	CC1(C)CC[C@@]2([C@H](O)C[C@]3(C)C(=CC[C@@H]4[C@@]5(C)CC[C@H](O)[C@@](C)(C=O)[C@@H]5CC[C@@]34C)[C@@H]2C1)C(O)=O	182844	10661.2	6463.98	4912.35	14879.8	6902.83
NEG_11902	[2M-2H+Na]-	QUINATE	0.119213	3.56833	0.274438	405.099	1.193					C7H12O6	AAWZDTNXLSGCEK-RKGSPJAZSA-N	C1[C@H]([C@H](C(C[C@@]1(C(=O)O)O)O)O)O	13454.1	5436.45	757.45	2519.01	1729.56	1257.65
NEG_2048	[M-H]-	Quinic acid	1.75551	22.7949	0.386538	191.057	1.194	C00296	Organic oxygen compounds	Organooxygen compounds	Alcohols and polyols	C7H12O6	AAWZDTNXLSGCEK-LNVDRNJUSA-N	OC1CC(O)(CC(O)C1O)C(O)=O	3.03105e+06	23023.8	8453.79	42193.2	20411.5	71746.8
NEG_47455	[M-H]-	Raddeanin A	0.207669	0.654156	0.485805	895.506	11.621					C47H76O16	VQQGPFFHGWNIGX-ARTIZJHXSA-N	CC1C(C(C(C(O1)OC2C(C(C(OC2OC3C(C(COC3OC4CC[C@]5(C(C4(C)C)CC[C@@]6(C5CC=C7[C@]6(CC[C@@]8(C7CC(CC8)(C)C)C(=O)O)C)C)C)O)O)CO)O)O)O)O)O	2269.21	76454.4	38043.6	42746.2	91792.8	43961.5
NEG_24282	[M-H]-	Raffinose	0.631959	0.200894	0.108952	549.164	1.126	C00492	Organic oxygen compounds	Organooxygen compounds	Carbohydrates and carbohydrate conjugates	C18H32O16	MUPFEKGTMRGPLJ-ZQSKZDJDSA-N	OCC1OC(OCC2OC(OC3(CO)OC(CO)C(O)C3O)C(O)C(O)C2O)C(O)C(O)C1O	0	77737.2	40604	71575.6	324206	193290
NEG_13290	[M+HCOO]-	Resibufogenin	0.404976	3.4263	0.445472	429.226	8.807		Lipids and lipid-like molecules	Steroids and steroid derivatives	Steroid lactones	C24H32O4	ATLJNLYIJOCWJE-UHFFFAOYSA-N	CC12CCC(O)CC1CCC3C2CCC4(C)C(CC5OC345)C6=COC(=O)C=C6	184966	9279.82	13401.7	26557.1	17498.1	16548.8
NEG_2962	[M-H]-	Resveratrol	0.155118	0.68544	0.161324	227.068	8.143		Phenylpropanoids and polyketides	Stilbenes		C14H12O3	LUKBXSAWLPMMSZ-UHFFFAOYSA-N	OC1=CC=C(C=C1)C=CC2=CC(=CC(=C2)O)O	18922.2	46009.6	36855.9	47448.7	43175.6	57875.6
NEG_13540	[M-H]-	Reynoutrin	0.344803	0.573567	0.276866	433.067	4.942		Phenylpropanoids and polyketides	Flavonoids	Flavonoid glycosides	C20H18O11	PZZRDJXEMZMZFD-BWYUNELBSA-N	OC1COC(OC2=C(OC3=C(C(=CC(=C3)O)O)C2=O)C4=CC(=C(O)C=C4)O)C(O)C1O	2005.9	147142	79137.4	164857	112245	120908
NEG_14159	[M-H]-	Rhodomyrtone	0.238833	0.525137	0.159048	441.225	6.376		Organoheterocyclic compounds	Benzopyrans	1-benzopyrans	C26H34O6	TYDBFNAOFZIICW-UHFFFAOYSA-N	CC(C)CC1C2=C(O)C(=C(O)C=C2OC3=C1C(=O)C(C)(C)C(=O)C3(C)C)C(=O)CC(C)C	2748.7	43648.1	47791.9	64866	44185	70309.2
NEG_26921	[M-H]-	Rhoifolin	0.0298921	0.800164	0.516923	577.151	10.274					C27H30O14	RPMNUQRUHXIGHK-URYCSNAJSA-N	CC1[C@@H]([C@@H](C([C@@H](O1)OC2[C@@H]([C@@H](C(O[C@H]2OC3=CC(=C4C(=C3)OC(=CC4=O)C5=CC=C(C=C5)O)O)CO)O)O)O)O)O	5581.43	1392.09	5527.12	4281.2	5507.66	5833.74
NEG_45084	[M-H]-	Rifabutin	0.434187	0.540495	0.168939	845.433	10.976		Phenylpropanoids and polyketides	Macrolactams		C46H62N4O11	ATEBXHFBFRCZMA-VXTBVIBXSA-N	COC1C=COC2(C)OC3=C(C)C(=C4C(=O)C(=C5NC6(CCN(CC6)CC(C)C)N=C5C4=C3C2=O)N=C(O)C(=CC=CC(C)C(O)C(C)C(O)C(C)C(OC(C)=O)C1C)C)O	5698.29	185449	127533	208339	204132	177135
NEG_14049	[M-H]-	Roburic acid	0.272019	1.89514	0.398377	439.353	12.663					C30H48O2	RPPYCVULPFKBOG-CSHKLQQTSA-N	C[C@@H]1CC[C@@]2(CC[C@@]3(C(=CC[C@H]4[C@]3(CC[C@H]([C@]4(C)CCC(=O)O)C(=C)C)C)[C@@H]2[C@H]1C)C)C	203.828	52226.5	47437.4	15632.7	19887	17177.1
NEG_34798	[M-H]-	Rosamultin	0.120142	0.300605	0.253802	685.365	7.186					C36H58O10	MLKQAGPAYHTNQQ-ZFCIFJTHSA-N	C[C@@H]1CC[C@@]2(CC[C@@]3(C(=CC[C@@H]4[C@]3(CCC5[C@@]4(C[C@@H]([C@H](C5(C)C)O)O)C)C)[C@H]2[C@]1(C)O)C)C(=O)O[C@H]6[C@@H]([C@H]([C@@H]([C@H](O6)CO)O)O)O	1466.6	5021.84	2869.19	6038.11	21018.1	4073.12
NEG_3709	[M-H]-	Rubiadin	0.526931	0.463281	0.0910766	253.051	8.258		Benzenoids	Anthracenes	Anthraquinones	C15H10O4	IRZTUXPRIUZXMP-UHFFFAOYSA-N	CC1=C(O)C=C2C(=O)C3=C(C=CC=C3)C(=O)C2=C1O	4252.61	170538	163744	219203	221920	289609
NEG_29601	[M-H]-	Rutin	0.0559919	0.557165	0.288053	609.134	5.668	C05625	Phenylpropanoids and polyketides	Flavonoids	Flavonoid glycosides	C27H30O16	IKGXIBQEEMLURG-NVPNHPEKSA-N	CC1OC(OCC2OC(OC3=C(OC4=C(C(=CC(=C4)O)O)C3=O)C5=CC(=C(O)C=C5)O)C(O)C(O)C2O)C(O)C(O)C1O	4026.45	3064.96	3316.05	7498.3	9299.57	1881.44
NEG_40811	[M-H]-	Saikosaponin a	0.115375	0.900109	0.836325	779.443	10.528					C42H68O13	KYWSCMDFVARMPN-UHFFFAOYNA-N	OCC1OC(OC2C(O)C(OC(C)C2O)OC3CCC4(C)C5C=CC67OCC8(CCC(C)(C)CC68)C(O)CC7(C)C5(C)CCC4C3(C)CO)C(O)C(O)C1O	1530.28	29141.5	19313.2	19575.3	21768.4	14188.4
NEG_43902	[M+FA-H]-	Saikosaponin b2	0.101215	0.897984	0.824409	825.46	11.414					C42H68O13	WRYJYFCCMSVEPQ-UHFFFAOYNA-N	OCC1OC(OC2C(O)C(OC(C)C2O)OC3CCC4(C)C5C=CC6=C7CC(C)(C)CCC7(CO)C(O)CC6(C)C5(C)CCC4C3(C)CO)C(O)C(O)C1O	8195.48	42345.5	18060.8	29001.5	30228.2	17165.7
NEG_48797	[M-H]-	Saikosaponin C	0.308924	3.22971	0.347378	925.498	11.106					C48H78O17	PYJMYPPFWASOJX-UHFFFAOYNA-N	OCC1OC(OCC2OC(OC3CCC4(C)C5C=CC6=C7CC(C)(C)CCC7(CO)C(O)CC6(C)C5(C)CCC4C3(C)C)C(O)C(O)C2OC8OC(C)C(O)C(O)C8O)C(O)C(O)C1O	7333.45	15655	71610	16513.7	6834.51	5941.82
NEG_5239	[M-H]-	Sakuranetin	0.66591	0.906896	0.844795	285.076	7.426					C16H14O5	DJOJDHGQRNZXQQ-UHFFFAOYNA-N	O=C1C=2C(O)=CC(OC)=CC2OC(C3=CC=C(O)C=C3)C1	1.31045e+06	412462	306038	607402	928484	701359
NEG_693	[M-H]-	Salicylic acid	0.177546	0.539897	0.252357	137.024	2.771	C00805	Benzenoids	Benzene and substituted derivatives	Benzoic acids and derivatives	C7H6O3	YGSDEFSMJLZEOE-UHFFFAOYSA-N	OC(=O)C1=C(O)C=CC=C1	1223.29	34814.2	22091.1	28468.5	50959.4	28238.1
NEG_6012	[M-H]-	Salicylic acid glucoside	0.0345716	0.967208	0.959191	299.076	1.879		Organic oxygen compounds	Organooxygen compounds	Carbohydrates and carbohydrate conjugates	C13H16O8	TZPBMNKOLMSJPF-UHFFFAOYSA-N	OCC1OC(OC2=CC=CC=C2C(O)=O)C(O)C(O)C1O	3885.45	965.273	979.593	3078.96	2315.34	633.688
NEG_28330	[M-H]-	Saponarin	0.0670176	1.48175	0.331614	593.152	4.298					C27H30O15	HGUVPEBGCAVWID-UHFFFAOYNA-N	C1=CC(=CC=C1C2=CC(=O)C3=C(C(=C(C=C3O2)OC4C(C(C(C(O4)CO)O)O)O)C5C(C(C(C(O5)CO)O)O)O)O)O	4103.43	2460.52	1814.47	1133.12	2722.89	1798.4
NEG_9653	[M-H]-	Secoisolariciresinol	0.272568	0.82467	0.730492	361.162	5.2					C20H26O6	PUETUDUXMCLALY-UHFFFAOYNA-N	OC1=CC=C(C=C1OC)CC(CO)C(CO)CC2=CC=C(O)C(OC)=C2	848.353	167983	105927	107226	78580.5	147368
NEG_34767	[M-H]-	Secoisolariciresinol diglucoside	0.0361376	2.52815	0.309757	685.264	4.455					C32H46O16	SBVBJPHMDABKJV-UHFFFAOYNA-N	OC1=CC=C(C=C1OC)CC(COC2OC(CO)C(O)C(O)C2O)C(COC3OC(CO)C(O)C(O)C3O)CC4=CC=C(O)C(OC)=C4	1393.03	592.747	153.34	433.738	221.589	190.793
NEG_2849	[M-H]-	Sinapic acid	0.289919	0.50008	0.0586674	223.061	4.156					C11H12O5	PCMORTLOPMLEFB-UHFFFAOYSA-N	COC1=CC(=CC(=C1O)OC)C=CC(=O)O	10725.3	57856.3	46719.4	71890.5	83672.5	75002
NEG_1790	[M-H]-	Sorbo	0.762092	0.250335	0.133208	181.07	1.1		Organic oxygen compounds	Organooxygen compounds	Carbohydrates and carbohydrate conjugates	C6H14O6	FBPFZTCFMRRESA-NQAPHZHOSA-N	OC[C@@H](O)[C@H](O)[C@@H](O)C(O)CO	15.6715	162106	70635	124211	518218	287351
NEG_4531	[M-H]-	Sotalol	0.382423	1.0426	0.941402	271.109	5.646	C07309	Benzenoids	Benzene and substituted derivatives	Sulfanilides	C12H20N2O3S	ZBMZVLHSJCTVON-UHFFFAOYSA-N	CC(C)NCC(O)C1=CC=C(N[S](C)(=O)=O)C=C1	2770.1	168060	184408	71063.8	139522	130138
NEG_48149	[M-H]-	Soyasapogenol B base + O-HexA-Pen-dHex	0.167262	1.0105	0.986302	911.499	11.633		Lipids and lipid-like molecules	Prenol lipids	Terpene glycosides	C47H76O17	IBZLICPLPYSFNZ-UHFFFAOYSA-N	CC1OC(OC2C(O)C(O)COC2OC3C(O)C(O)C(OC3OC4CCC5(C)C(CCC6(C)C5CC=C7C8CC(C)(C)CC(O)C8(C)CCC67C)C4(C)CO)C(O)=O)C(O)C(O)C1O	964.344	65061.1	32994.9	36625.7	34920	26446.2
NEG_50186	[M-H]-	Soyasaponin Ba	0.104343	2.32663	0.093619	957.532	12.472		Lipids and lipid-like molecules	Prenol lipids	Terpene glycosides	C48H78O19	WFRQIKSNAYYUJZ-UHFFFAOYNA-N	CC1(C)CC(O)C2(C)CCC3(C)C(=CCC4C5(C)CCC(OC6OC(C(O)C(O)C6OC7OC(CO)C(O)C(O)C7OC8OC(CO)C(O)C(O)C8O)C(O)=O)C(C)(CO)C5CCC34C)C2C1	5692.74	5804.91	3163.3	2726.78	3313.11	261.475
NEG_49493	[M-H]-	Soyasaponin Bb	0.0716868	0.238478	0.229215	941.501	12.962					C48H78O18	PTDAHAWQAGSZDD-UHFFFAOYNA-N	O=C(O)C1OC(OC2CCC3(C)C(CCC4(C)C3CC=C5C6CC(C)(C)CC(O)C6(C)CCC54C)C2(C)CO)C(OC7OC(CO)C(O)C(O)C7OC8OC(C)C(O)C(O)C8O)C(O)C1O	704.108	583.934	1096.57	2649.31	643.163	6706.83
NEG_13287	[M-H]-	Stachybotrysin B	0.551495	0.455507	0.0995073	429.221	9.463							CC1(C)[C@H](OC(C)=O)CC[C@]([C@@]1([H])CC[C@H]2C)(C)[C@]32CC4=C(O)C=C(CO)C(C=O)=C4O3>>	167351	77284.8	42542.3	187734	157478	285246
NEG_5085	[M-H]-	Stearic acid	0.483973	1.18076	0.684534	283.261	13.417	C01530	Lipids and lipid-like molecules	Fatty Acyls	Fatty acids and conjugates	C18H36O2	QIQXTHQIDYTFRH-UHFFFAOYSA-N	CCCCCCCCCCCCCCCCCC(O)=O	426895	170303	177498	276128	163392	216576
NEG_10091	[M+FA-H]-	Stenophylline A	0.289851	0.362885	0.30604	371.095	2.361	C05158	Organic oxygen compounds	Organooxygen compounds	Carbohydrates and carbohydrate conjugates	C15H18O8	GVRIYIMNJGULCZ-ZMKUSUEASA-N	OCC1OC(OC2=C(C=CC=C2)C=CC(O)=O)C(O)C(O)C1O	1592.34	59399.2	1242.74	74388.7	9167.57	87942.3
NEG_32070	[M-H]-	Steviolbioside	0.0933932	0.239888	0.33945	641.326	9.357					C32H50O13	OMHUCGDTACNQEX-OSHKXICASA-N	C[C@@]12CCC[C@@]([C@H]1CC[C@]34[C@H]2CC[C@](C3)(C(=C)C4)O[C@H]5[C@@H]([C@H]([C@@H]([C@H](O5)CO)O)O)O[C@H]6[C@@H]([C@H]([C@@H]([C@H](O6)CO)O)O)O)(C)C(=O)O	1352.04	2121.26	580.042	1293.19	13467.9	2135.75
NEG_332	[M-H]-	Succinic acid	0.731973	0.626253	0.429137	117.02	1.198		Organic acids and derivatives	Carboxylic acids and derivatives	Dicarboxylic acids and derivatives	C4H6O4	KDYFGRWQOYBRFD-UHFFFAOYSA-N	OC(=O)CCC(O)=O	16.3521	1.00584e+06	342888	777864	563404	812411
NEG_6724	[M-H]-	Sulfadimethoxine	0.0413313	1.02656	0.955831	309.072	4.164		Benzenoids	Benzene and substituted derivatives	Benzenesulfonamides	C12H14N4O4S	ZZORFUFYDOWNEF-UHFFFAOYSA-N	COC1=NC(=NC(=C1)N[S](=O)(=O)C2=CC=C(N)C=C2)OC	11547.9	11391.9	2043.19	7418.56	5277.43	11640.5
NEG_6537	[M-H]-	Sulfo jasmonate	0.473536	0.648615	0.536987	305.069	3.35		Lipids and lipid-like molecules	Fatty Acyls	Lineolic acids and derivatives	C12H18O7S	MLUJBNROAVANKK-UHFFFAOYSA-N	OC(=O)CC1CCC(=O)C1CC=CCCO[S](O)(=O)=O	5814.07	400405	94415.2	146064	354837	270949
NEG_1787	[M-H]-	Syringaldehyde	0.0784296	0.727155	0.284167	181.054	4.121		Benzenoids	Phenols	Methoxyphenols	C9H10O4	KCDXJAYRVLXPFO-UHFFFAOYSA-N	COC1=CC(=CC(=C1O)OC)C=O	15226.8	8570.08	5460.29	13142.1	14711.7	12381.3
NEG_20299	[M-H]-	Syringetin-3-O-galactoside	0.406536	0.681122	0.482108	507.112	5.297		Phenylpropanoids and polyketides	Flavonoids	Flavonoid glycosides	C23H24O13	JMFWYRWPJVEZPV-UHFFFAOYNA-N	COC1=CC(=CC(=C1O)OC)C2=C(OC3OC(CO)C(O)C(O)C3O)C(=O)C4=C(O)C=C(O)C=C4O2	7952.27	281702	214645	356109	233253	151033
NEG_20900	[M-H]-	Taurocholic acid	0.0326227	0.935582	0.809968	514.274	10.389	C05122	Lipids and lipid-like molecules	Steroids and steroid derivatives	Bile acids, alcohols and derivatives	C26H45NO7S	WBWWGRHZICKQGZ-HZAMXZRMSA-N	CC(CCC(O)=NCC[S](O)(=O)=O)C1CCC2C3C(O)CC4CC(O)CCC4(C)C3CC(O)C12C	4448.43	3631.03	4972.37	4923.86	6402.1	2624.54
NEG_6377	[M-H]-	Taxifolin	1.00074	27.0285	0.379963	303.05	4.427		Phenylpropanoids and polyketides	Flavonoids	Flavans	C15H12O7	CXQWRCVTCMQVQX-LSDHHAIUSA-N	O[C@@H]1[C@H](OC2=CC(=CC(=C2C1=O)O)O)C3=CC(=C(O)C=C3)O	972891	7339.7	8034.37	16523.5	7722.18	12318.1
NEG_23040	[M-H]-	Tenuigenin	0.597797	0.190556	0.0744366	535.272	6.675					C30H45ClO6	CWHJIJJSDGEHNS-JUXXGFFYSA-N	C[C@@]12CCC3[C@@]([C@H]1C[C@@H](C4=C2CC[C@@]5([C@@H]4CC(CC5)(C)C)C(=O)O)CCl)(C[C@@H]([C@@H]([C@]3(C)C(=O)O)O)O)C	21181	50134.8	19761.6	77365.7	258070	142521
NEG_9955	[M-H]-	Tetracosanoic acid	0.211142	25.5428	0.305612	367.356	13.344	C08320	Lipids and lipid-like molecules	Fatty Acyls	Fatty acids and conjugates	C24H48O2	QZZGJDVWLFXDLK-UHFFFAOYSA-N	CCCCCCCCCCCCCCCCCCCCCCCC(O)=O	7196.35	57137.3	883.496	176.97	1102.43	1273.84
NEG_30731	[M-H]-	Thalsimidine	0.0320711	0.728004	0.162253	621.248	6.487					C37H38N2O7	CLDCTFPNFRITPI-UHFFFAOYNA-N	OC=1C(OC)=C(OC)C=2OC3=CC=4C(=NCCC4C=C3OC)CC5=CC=C(OC6=CC(=CC=C6OC)CC7C2C1CCN7C)C=C5	1841.17	2724.11	1684.68	3100.36	2228.48	3256.22
NEG_8587	[M-H]-	Thiophanate-methyl	0.0535757	2.05881	0.240984	341.038	5.82		Benzenoids	Benzene and substituted derivatives		C12H14N4O4S2	QGHREAKMXXNCOA-UHFFFAOYSA-N	COC(=O)NC(=S)NC1=CC=CC=C1NC(=S)NC(=O)OC	727.835	1000.83	1994.77	428.847	1112.62	267.073
NEG_10142	[M-H]1-	Thromboxane B1	0.0449859	0.919647	0.8493	371.241	6.67		Lipids and lipid-like molecules	Fatty Acyls	Eicosanoids	C20H36O6	JSDWWNLTJCCSAV-VZBVYBAISA-N	CCCCC[C@H](O)\\C=C\\[C@H]1OC(O)C[C@H](O)[C@@H]1CCCCCCC(O)=O	6126.88	3289.92	1171.23	2897.01	4624.83	3991.3
NEG_7544	[M-H]-	Toxin HT 2	0.116913	1.48318	0.748803	322.201	7.082		Lipids and lipid-like molecules	Prenol lipids	Sesquiterpenoids	C22H32O8	PNKLMTPXERFKEN-UHFFFAOYSA-N	CC(C)CC(=O)OC1CC2(COC(C)=O)C(OC3C(O)C(O)C2(C)C34CO4)C=C1C	144.131	63949.8	2995.64	23483.1	11646.7	10103.8
NEG_13714	[M+FA-H]-	trans-piceid	0.466938	0.475222	0.0994185	435.125	5.166					C20H22O8	HSTZMXCBWJGKHG-UHFFFAOYNA-N	OC1=CC=C(C=C1)C=CC=2C=C(O)C=C(OC3OC(CO)C(O)C(O)C3O)C2	6722.98	150976	88038	185834	162752	168513
NEG_4953	[M-H]-	trans-Vaccenic acid	2.86559	0.40983	0.168345	281.249	11.73	C08367	Lipids and lipid-like molecules	Fatty Acyls	Fatty acids and conjugates	C18H34O2	UWHZIFQPPBDJPM-BQYQJAHWSA-N	CCCCCC\\C=C\\CCCCCCCCCC(O)=O	605.17	5.13408e+06	3.32329e+06	3.94151e+06	6.27971e+06	1.04165e+07
NEG_8620	[M-H]-	Trehalose	0.130131	1.25672	0.651569	341.102	8.05	C01083	Organic oxygen compounds	Organooxygen compounds	Carbohydrates and carbohydrate conjugates	C12H22O11	HDTRYLNUVZCQOY-LIZSDCNHSA-N	OCC1OC(OC2OC(CO)C(O)C(O)C2O)C(O)C(O)C1O	23202.8	43630.2	12221	12578.5	17464.5	32862.1
NEG_11237	[M-H]-	Triamcinolone	0.147151	0.647495	0.442875	393.176	4.241		Lipids and lipid-like molecules	Steroids and steroid derivatives	Hydroxysteroids	C21H27FO6	GFNANZIMVAIWHM-OBYCQNJPSA-N	C[C@]12C[C@H](O)[C@@]3(F)[C@@H](CCC4=CC(=O)C=C[C@]34C)[C@@H]1C[C@@H](O)[C@]2(O)C(=O)CO	23421.2	20486.1	10460.8	48011.5	10448.3	25507.2
NEG_6222	[M-H]-	Tricetin	0.238194	3.37969	0.463874	301.035	4.858	C10192	Phenylpropanoids and polyketides	Flavonoids	Flavones	C15H10O7	ARSRJFRKVXALTF-UHFFFAOYSA-N	OC1=CC2=C(C(=C1)O)C(=O)C=C(O2)C3=CC(=C(O)C(=C3)O)O	1991.88	98887.5	7527.13	7995.24	12911.5	11169.2
NEG_9306	[M-H]-	Tricosanoic acid	0.571344	1.49532	0.634061	353.342	13.005		Lipids and lipid-like molecules	Fatty Acyls	Fatty acids and conjugates	C23H46O2	XEZVDURJDFGERA-UHFFFAOYSA-N	CCCCCCCCCCCCCCCCCCCCCCC(O)=O	413.586	184442	326527	37454.9	223071	81462.8
NEG_2327	[M-H]-	Tryptophan	0.566738	19.8245	0.373636	203.084	2.516	C00078	Organoheterocyclic compounds	Indoles and derivatives	Indolyl carboxylic acids and derivatives	C11H12N2O2	QIVBCDIJIAJPQS-VIFPVBQESA-N	NC(CC1=C[NH]C2=C1C=CC=C2)C(O)=O	214.347	8438.24	239778	138.384	10470.4	1922.74
NEG_19343	[M-H]-	Tsugaric acid A	0.0762101	2.25522	0.516503	497.351	13.391					C32H50O4	FIWGZIBLJWZUEA-VOKVCYHDSA-N	CC(=CCCC(C1CC[C@]2([C@]1(CCC3=C2CCC4[C@@]3(CCC(C4(C)C)OC(=O)C)C)C)C)C(=O)O)C	394.029	844.739	5711.98	313.561	2278.02	490.492
NEG_1137	[M-H]-	Umbelliferone	0.151242	0.987299	0.984933	161.025	4.503	C09315	Phenylpropanoids and polyketides	Coumarins and derivatives	Hydroxycoumarins	C9H6O3	ORHBXUUXSCNDEV-UHFFFAOYSA-N	OC1=CC2=C(C=C1)C=CC(=O)O2	471.137	24906.2	31636.3	34359.1	13709.4	9678.59
NEG_40244	[M-H]-	Unguisin E	0.0766116	1.10818	0.785395	771.413	8.79		Organic acids and derivatives	Peptidomimetics	Hybrid peptides	C41H56N8O7	NZNSTOHSZZLSNP-UHFFFAOYSA-N	CC(C)C1N=C(O)C(N=C(O)C(N=C(O)C(C)N=C(O)CCCN=C(O)C(CC2=C[NH]C3=C2C=CC=C3)N=C(O)C(C)N=C1O)C(C)C)C(C)C4=CC=CC=C4	2445.81	9414.8	6541.85	5111.21	6283.69	5211.08
NEG_5223	[M-H]-	Uralenneoside	3.5136	6.22137	0.39905	285.062	1.757		Benzenoids	Benzene and substituted derivatives	Benzoic acids and derivatives	C12H14O8	VWQASRWQZBVNEI-UHFFFAOYSA-N	OC1COC(OC(=O)C2=CC(=C(O)C=C2)O)C(O)C1O	1.28266e+07	924784	119678	630500	402595	1.19649e+06
NEG_692	[M-H]-	Urocanic acid	0.0379045	0.621306	0.450685	137.023	1.394		Organoheterocyclic compounds	Azoles	Imidazoles	C6H6N2O2	LOIYMIARKYCTBW-UHFFFAOYSA-N	OC(=O)C=CC1=CN=C[NH]1	3695.51	602.284	1494.75	2014.32	2064.42	5244.44
NEG_15158	[M-H]-	Ursonic acid	0.892682	6.70984	0.388153	453.333	11.763					C30H46O3	MUCRYNWJQNHDJH-VUVJRWLCSA-N	CC1CC[C@@]2(CC[C@@]3(C(=CCC4[C@]3(CCC5[C@@]4(CCC(=O)C5(C)C)C)C)C2C1C)C)C(=O)O	796104	44849.7	25397.9	18195.2	60454.2	50467.3
NEG_664	[M-H]-	Valine	0.21317	0.532817	0.346606	136.041	3.113	C00183	Organic acids and derivatives	Carboxylic acids and derivatives	Amino acids, peptides, and analogues	C5H11NO2	KZSNJWFQEVHDMF-BYPYZUCNSA-N	CC(C)C(N)C(O)=O	1220.22	56627.5	9596.32	28809.4	48819.6	48951
NEG_1293	[M-H]-	Vanillic acid	0.304414	0.486602	0.0813494	167.034	3.129	C06672	Benzenoids	Benzene and substituted derivatives	Benzoic acids and derivatives	C8H8O4	WKOLLVMJNQIZCI-UHFFFAOYSA-N	COC1=CC(=CC=C1O)C(O)=O	10280.3	64655.3	30047.6	70335.5	74114.6	71297.4
NEG_2204	[M-H]-	Vanillylmandelic acid	0.602932	0.489082	0.351746	197.045	2.437	C05584	Benzenoids	Phenols	Methoxyphenols	C9H10O5	CGQCWMIAEPEHNQ-UHFFFAOYSA-N	COC1=CC(=CC=C1O)C(O)C(O)=O	1018.14	456969	7429.14	329802	259840	361971
NEG_38830	[M-H]-	Vindesine	0.0615573	0.937349	0.922028	752.373	7.915		Alkaloids and derivatives	Vinca alkaloids		C43H55N5O7	HHJUWIANJFBDHT-KOTLKJBCSA-N	CCC1(O)CC2CN(CCC3=C([NH]C4=C3C=CC=C4)C(C2)(C(=O)OC)C5=C(OC)C=C6N(C)C7C(O)(C(O)C8(CC)C=CCN9CCC7(C89)C6=C5)C(O)=N)C1	311.887	5467.13	5547.68	7373.16	2806.96	1903.64
NEG_6224	[M-H]-	Viscidulin I	0.518647	0.530053	0.156206	301.035	5.489		Phenylpropanoids and polyketides	Flavonoids	Flavones	C15H10O7	NULZZCUABWZIRV-UHFFFAOYSA-N	OC1=CC2=C(C(=C1)O)C(=O)C(=C(O2)C3=C(O)C=CC=C3O)O	10517.5	252427	160095	284123	273674	240309
NEG_13321	[M-H]-	Vitamin E	0.169116	0.982588	0.983419	429.372	13.05	C02477	Lipids and lipid-like molecules	Prenol lipids	Quinone and hydroquinone lipids	C29H50O2	GVJHHUAWPYXKBD-IEOSBIPESA-N	CC(C)CCC[C@@H](C)CCC[C@@H](C)CCC[C@]1(C)CCC2=C(O1)C(=C(C)C(=C2C)O)C	79.8485	26646.2	52304.6	11518.1	56365	12548.1
NEG_35936	[M-H]-	Voacamine	0.127041	0.753111	0.688026	703.4	11.745		Alkaloids and derivatives	Ibogan-type alkaloids		C43H52N4O5	VCMIRXRRQJNZJT-UHFFFAOYNA-N	CCC1CC2CN3CCC4=C([NH]C5=CC(=C(OC)C=C45)C6CC7C(C(CC8=C6[NH]C9=CC=CC=C89)N(C)CC7=CC)C(=O)OC)C(C2)(C13)C(=O)OC	28957.6	1737.89	13703	35624.6	12629.9	10698.9
NEG_16724	[M+FA-H]-	Xyl(b1-6)Glc(b)-O-octyl	0.29312	1.26492	0.501413	469.226	6.896		Lipids and lipid-like molecules	Fatty Acyls	Fatty acyl glycosides	C19H36O10	IBSNNVHJJNLMJW-BMVMOQKNSA-N	CCCCCCCCO[C@@H]1O[C@H](CO[C@@H]2OC[C@@H](O)[C@H](O)[C@H]2O)[C@@H](O)[C@H](O)[C@H]1O	138704	84932.4	56693	86225.1	83786.1	51606.4
NEG_7437	[M-H]-	Zearalenol	0.616445	19.0699	0.373067	319.153	6.455		Phenylpropanoids and polyketides	Macrolides and analogues		C18H24O5	FPQFYIAXQDXNOR-XVNBXDOJSA-N	CC1CCCC(O)CCCC=CC2=C(C(=CC(=C2)O)O)C(=O)O1	363700	4235.83	9444.96	6408.96	5199.6	8180.76
