# Supplementary material for: Integration analysis of transcriptome and metabolome reveals role of piceatannol in regulation of fruit drop in Chinese bayberry (Morella rubra Sieb. et Zucc.)
Source: Research Square preprint supplement (doi:10.21203/rs.3.rs-7503570/v1), 2025-10-09
Supplement: Supplementary file 4 [file c2bb51c70de165943317b652.xlsx]

## Sheet: Table S1
Supplemental Table S3. Information of 17 up- and 32 down-regulated DEGs with treatment of piceatannol compared to the CK
Table legend:
Gene ID	ID of diffrentially expressed genes (NCBI database)
Log2FC	log2 Fold change value of each gene
Qvalue	adjusted p-values
ck_1 FPKM to ck-3_FPKM	fragments per kilobase of transcript per million mapped reads of RNA-seq in ck
P-1_FPKM to P-3_FPKM	fragments per kilobase of transcript per million mapped reads of RNA-seq in treatment of piceatannol
TFs	transcription factors
GO	Gene Ontology Analysis
Kegg Orthology	annotation from Kyoto Encyclopedia of Genes and Genomes database
Nr	annotation from Non-Redundant Protein Sequence database
Gene ID	log2(Piceatannol/CK)	Qvalue(CK-vs-Piceatannol)	ck_3 FPKM	P_3 FPKM	P_2 FPKM	ck_2 FPKM	P_1 FPKM	ck_1 FPKM	TFs	GO	Kegg Orthology	Nr
CJ030_MR0G000306	20.9673	3.25287e-07	0	0	0	0.01	3.29	0	C3H	GO:0016021//integral component of membrane;GO:0016020//membrane;GO:0005886//plasma membrane;GO:0015079//potassium ion transmembrane transporter activity;GO:0009674//potassium:sodium symporter activity;GO:1990573//potassium ion import across plasma membrane;GO:0006813//potassium ion transport;		>KAB1201690.1 Potassium transporter 5 [Morella rubra] >KAB1207687.1 Potassium transporter 5 [Morella rubra]
CJ030_MR0G004419	-21.0264	3.52755e-07	2.38	0	0	0	0	0	C2H2	GO:0005681//spliceosomal complex;GO:0005524//ATP binding;GO:0016787//hydrolase activity;GO:0003723//RNA binding;GO:0003724//RNA helicase activity;GO:0009793//embryo development ending in seed dormancy;GO:0006397//mRNA processing;GO:0008380//RNA splicing;	K12813//pre-mRNA-splicing factor ATP-dependent RNA helicase DHX16 [EC:3.6.4.13]+ko03040//Spliceosome;	>KAB1201290.1 putative pre-mRNA-splicing factor ATP-dependent RNA helicase DHX16 [Morella rubra] >KAB1201299.1 putative pre-mRNA-splicing factor ATP-dependent RNA helicase DHX16 [Morella rubra]
CJ030_MR0G008974	-27.9631	9.10159e-09	630.68	0	0	0	0	0	MYB_related	GO:0048046//apoplast;GO:0009507//chloroplast;GO:0009570//chloroplast stroma;GO:0005737//cytoplasm;GO:0005829//cytosol;GO:0009506//plasmodesma;GO:0005524//ATP binding;GO:0031956//medium-chain fatty acid-CoA ligase activity;GO:0050203//oxalate-CoA ligase activity;GO:0050832//defense response to fungus;GO:0006631//fatty acid metabolic process;GO:0033611//oxalate catabolic process;GO:0010030//positiv…	K22133//oxalate---CoA ligase [EC:6.2.1.8]+ko00630//Glyoxylate and dicarboxylate metabolism+ko01100//Metabolic pathways;	>KAB1199922.1 4-coumarate--CoA ligase-like 10 [Morella rubra]
CJ030_MR0G013901	-23.9703	8.21437e-07	36.77	0	0	0	0	0	ERF	GO:0005634//nucleus;GO:0003677//DNA binding;GO:0003700//DNA-binding transcription factor activity;GO:0009877//nodulation;GO:0006355//regulation of transcription, DNA-templated;		>KAB1199769.1 Ethylene-responsive transcription factor RAP2-11 [Morella rubra]
CJ030_MR0G027767	-23.527	1.53574e-06	0	0	0	0	0	17.22		GO:0005887//integral component of plasma membrane;GO:0043231//intracellular membrane-bounded organelle;GO:0016020//membrane;GO:0005886//plasma membrane;GO:0005524//ATP binding;GO:0019829//cation-transporting ATPase activity;GO:0005516//calmodulin binding;GO:0046872//metal ion binding;GO:0005388//calcium-transporting ATPase activity;GO:0009567//double fertilization forming a zygote and endosperm;G…		>KAB1199091.1 Calcium-transporting ATPase 9, plasma membrane-type [Morella rubra]
CJ030_MR1G006437	-21.8104	1.51657e-07	5.38	0	0	0	0	0		GO:0009507//chloroplast;GO:0005783//endoplasmic reticulum;GO:0005576//extracellular region;GO:0016021//integral component of membrane;GO:0042742//defense response to bacterium;GO:0009873//ethylene-activated signaling pathway;GO:0043069//negative regulation of programmed cell death;GO:0009626//plant-type hypersensitive response;GO:0009723//response to ethylene;GO:0009751//response to salicylic aci…		>KAB1225160.1 GRAM domain-containing protein YSP2 [Morella rubra]
CJ030_MR1G007507	-21.3636	3.50802e-07	11.93	0	0	0	0	0		GO:0016020//membrane;GO:0005773//vacuole;GO:0004430//1-phosphatidylinositol 4-kinase activity;GO:0005524//ATP binding;GO:0009651//response to salt stress;	K14544//U3 small nucleolar RNA-associated protein 22+ko03008//Ribosome biogenesis in eukaryotes;	>KAB1215455.1 Phosphatidylinositol 4-kinase gamma 2 [Morella rubra] >KAB1226830.1 Phosphatidylinositol 4-kinase gamma 2 [Morella rubra]
CJ030_MR1G020012	-21.7441	1.70019e-07	4.34	0	0	0	0	0	GRAS	GO:0005576//extracellular region;GO:0003993//acid phosphatase activity;GO:0046872//metal ion binding;		>KAB1224922.1 putative inactive purple acid phosphatase 27 [Morella rubra]
CJ030_MR1G025247	-22.7878	3.93373e-06	28.81	0	0	0	0	0		GO:0016021//integral component of membrane;		>KAB1226030.1 hypothetical protein CJ030_MR1G025247 [Morella rubra]
CJ030_MR1G028207	3.9381	0.0163954	0.26	1.12	1.14	0.1	1.15	0	MYB	GO:0005801//cis-Golgi network;GO:0005829//cytosol;GO:0000139//Golgi membrane;GO:0017119//Golgi transport complex;GO:0042803//protein homodimerization activity;GO:0007030//Golgi organization;GO:0048193//Golgi vesicle transport;GO:0006891//intra-Golgi vesicle-mediated transport;GO:0006886//intracellular protein transport;GO:0009860//pollen tube growth;		>KAB1227077.1 Conserved oligomeric Golgi complex subunit 3 [Morella rubra] >KAB1227086.1 Conserved oligomeric Golgi complex subunit 3 [Morella rubra]
CJ030_MR1G028663	-23.3148	1.91701e-06	10.52	0	0	0	0	0		GO:0005737//cytoplasm;GO:0016607//nuclear speck;GO:0003723//RNA binding;GO:0006397//mRNA processing;	K14396//polyadenylate-binding protein 2+ko03015//mRNA surveillance pathway;	>KAB1224725.1 Polyadenylate-binding protein 2-A [Morella rubra] >KAB1224813.1 Polyadenylate-binding protein 2-A [Morella rubra]
CJ030_MR2G024421	20.8288	4.95453e-07	0	0.01	11.83	0.23	0	0	B3	GO:0005634//nucleus;GO:0003677//DNA binding;		>KAB1224143.1 hypothetical protein CJ030_MR2G024452 [Morella rubra] >KAB1224174.1 hypothetical protein CJ030_MR2G024421 [Morella rubra]
CJ030_MR2G026839	23.4171	1.75285e-06	0	0.28	0	0	47.25	0				>KAB1215910.1 hypothetical protein CJ030_MR4G028684 [Morella rubra] >KAB1222745.1 hypothetical protein CJ030_MR2G026839 [Morella rubra]
CJ030_MR3G001115	-22.9407	3.20941e-06	15.2	0	0	0	0	0		GO:0005829//cytosol;GO:0005634//nucleus;GO:0048826//cotyledon morphogenesis;GO:0009908//flower development;GO:0009965//leaf morphogenesis;GO:0051781//positive regulation of cell division;GO:0040008//regulation of growth;GO:0006355//regulation of transcription, DNA-templated;GO:0048316//seed development;GO:0010091//trichome branching;		>KAB1219402.1 hypothetical protein CJ030_MR3G001115 [Morella rubra]
CJ030_MR3G009540	-21.6149	2.37587e-07	0	0	0	3.39	0.12	0		GO:0009507//chloroplast;GO:0005829//cytosol;GO:0004564//beta-fructofuranosidase activity;GO:0033926//glycopeptide alpha-N-acetylgalactosaminidase activity;GO:0004575//sucrose alpha-glucosidase activity;GO:0048364//root development;GO:0005987//sucrose catabolic process;	K03884//NADH-ubiquinone oxidoreductase chain 6 [EC:7.1.1.2]+ko00190//Oxidative phosphorylation+ko01100//Metabolic pathways;	>KAB1219898.1 Alkaline/neutral invertase CINV2 [Morella rubra]
CJ030_MR3G015098	-21.9041	1.28249e-07	4.77	0	0	0	0	0	C2H2	GO:0016491//oxidoreductase activity;		>KAB1218981.1 hypothetical protein CJ030_MR3G015103 [Morella rubra]
CJ030_MR3G026526	7.07432	0.00639198	0.04	1.66	0.55	0.05	0.54	0.04		GO:0005737//cytoplasm;GO:0005634//nucleus;GO:0003914//DNA (6-4) photolyase activity;GO:0003677//DNA binding;GO:0071949//FAD binding;GO:0032922//circadian regulation of gene expression;GO:0006281//DNA repair;GO:0043153//entrainment of circadian clock by photoperiod;GO:0009411//response to UV;		>KAB1218639.1 (6-4)DNA photolyase [Morella rubra] >KAB1218646.1 (6-4)DNA photolyase [Morella rubra]
CJ030_MR3G028958	-2.71473	0.0355292	5.16	0.95	1.43	8.57	2.81	23.59				>KAB1219203.1 hypothetical protein CJ030_MR3G028958 [Morella rubra]
CJ030_MR4G001508	-22.3158	7.16293e-06	10.3	0	0	0	0	0	bHLH	GO:0005783//endoplasmic reticulum;GO:0016021//integral component of membrane;GO:0005886//plasma membrane;GO:0020037//heme binding;GO:0005506//iron ion binding;GO:0004497//monooxygenase activity;GO:0016705//oxidoreductase activity, acting on paired donors, with incorporation or reduction of molecular oxygen;GO:0009809//lignin biosynthetic process;GO:0009699//phenylpropanoid biosynthetic process;GO…	K09755//ferulate-5-hydroxylase [EC:1.14.-.-]+ko00940//Phenylpropanoid biosynthesis+ko01100//Metabolic pathways+ko01110//Biosynthesis of secondary metabolites;	>KAB1216675.1 Cytochrome P450 84A1 [Morella rubra]
CJ030_MR4G004176	-21.4861	2.45475e-07	0	0	0	0	0	4.32		GO:0005739//mitochondrion;		>KAB1215242.1 putative serine/threonine-protein kinase abkC [Morella rubra]
CJ030_MR4G012557	-5.79554	0.00687761	21023.9	144.86	252.54	345.45	77.17	387.34		GO:0005576//extracellular region;GO:0050832//defense response to fungus;GO:0031640//killing of cells of other organism;	K01183//chitinase [EC:3.2.1.14]+ko00520//Amino sugar and nucleotide sugar metabolism+ko01100//Metabolic pathways;	>KAB1215286.1 Thaumatin-like protein [Morella rubra]
CJ030_MR4G020440	-22.7374	4.01802e-06	18.21	0	0.01	0	0	0				>KAB1215730.1 Poly(U)-specific endoribonuclease-B [Morella rubra]
CJ030_MR4G025277	1.03907	0.0113106	67.14	140.29	108.78	64.57	151.1	72.93	MYB_related	GO:0016021//integral component of membrane;GO:0004650//polygalacturonase activity;GO:0005975//carbohydrate metabolic process;		>KAB1215368.1 putative polygalacturonase [Morella rubra]
CJ030_MR4G029050	-21.467	2.89129e-07	1.59	0	0	0	0	0	NAC	GO:0005737//cytoplasm;GO:0005634//nucleus;GO:0043531//ADP binding;GO:0050135//NAD(P)+ nucleosidase activity;GO:0061809//NAD+ nucleotidase, cyclic ADP-ribose generating;GO:0042803//protein homodimerization activity;GO:0050832//defense response to fungus;GO:0043068//positive regulation of programmed cell death;GO:0007165//signal transduction;	K00695//sucrose synthase [EC:2.4.1.13]+ko00500//Starch and sucrose metabolism+ko01100//Metabolic pathways+ko01110//Biosynthesis of secondary metabolites;	>KAB1216444.1 TMV resistance protein N [Morella rubra]
CJ030_MR5G011881	7.92183	0.0062013	0	4.85	19.38	0	1.15	0	CO-like	GO:0008194//UDP-glycosyltransferase activity;		>KAB1212781.1 UDP-glycosyltransferase 89B1 [Morella rubra]
CJ030_MR6G003930	5.78079	0.0167174	0	1.32	1.3	0.3	16.21	0.06	bHLH	GO:0000287//magnesium ion binding;GO:0010333//terpene synthase activity;	K12742//isoprene synthase [EC:4.2.3.27]+ko00900//Terpenoid backbone biosynthesis+ko01110//Biosynthesis of secondary metabolites;	>KAB1210104.1 putative terpene synthase 12 [Morella rubra]
CJ030_MR6G016109	7.39176	0.000446792	0.1	19.41	0.12	0.11	22.55	0.22	FAR1	GO:0005794//Golgi apparatus;GO:0016021//integral component of membrane;GO:0010222//stem vascular tissue pattern formation;		>KAB1209043.1 hypothetical protein CJ030_MR6G025917 [Morella rubra] >KAB1209048.1 hypothetical protein CJ030_MR6G025922 [Morella rubra] >KAB1209249.1 hypothetical protein CJ030_MR6G016109 [Morella rubra]
CJ030_MR6G019702	-22.4446	6.05164e-06	21.34	0	0	0	0	0	NAC	GO:0005737//cytoplasm;GO:0005739//mitochondrion;GO:0016629//12-oxophytodienoate reductase activity;GO:0010181//FMN binding;GO:0016491//oxidoreductase activity;GO:0006633//fatty acid biosynthetic process;GO:0009695//jasmonic acid biosynthetic process;GO:0031408//oxylipin biosynthetic process;GO:0009611//response to wounding;	K05894//12-oxophytodienoic acid reductase [EC:1.3.1.42]+ko00592//alpha-Linolenic acid metabolism+ko01100//Metabolic pathways+ko01110//Biosynthesis of secondary metabolites;	>KAB1210907.1 12-oxophytodienoate reductase 2 [Morella rubra] >KAB1210920.1 12-oxophytodienoate reductase 2 [Morella rubra]
CJ030_MR6G019818	-24.3837	4.95453e-07	41.7	0	0	0	0	0	CAMTA	GO:0016021//integral component of membrane;GO:0102336//3-oxo-arachidoyl-CoA synthase activity;GO:0102337//3-oxo-cerotoyl-CoA synthase activity;GO:0102338//3-oxo-lignoceronyl-CoA synthase activity;GO:0102756//very-long-chain 3-ketoacyl-CoA synthase activity;GO:0006633//fatty acid biosynthetic process;	K15397//3-ketoacyl-CoA synthase [EC:2.3.1.199]+ko00062//Fatty acid elongation+ko01100//Metabolic pathways+ko01110//Biosynthesis of secondary metabolites+ko04626//Plant-pathogen interaction;K14497//protein phosphatase 2C [EC:3.1.3.16]+ko04016//MAPK signaling pathway - plant+ko04075//Plant hormone signal transduction;	>KAB1210791.1 putative 3-ketoacyl-CoA synthase 14 [Morella rubra]
CJ030_MR7G012046	-21.5866	2.27547e-07	27.43	0	0	0	0	0		GO:0031225//anchored component of membrane;GO:0005886//plasma membrane;GO:0009536//plastid;GO:0090406//pollen tube;GO:0045927//positive regulation of growth;	K11584//serine/threonine-protein phosphatase 2A regulatory subunit B'+ko03015//mRNA surveillance pathway;	>KAB1205318.1 GPI-anchored protein LORELEI [Morella rubra]
CJ030_MR7G014377	-20.8817	3.25287e-07	9.4	0	0	0	0	0	bHLH	GO:0016021//integral component of membrane;GO:0005886//plasma membrane;GO:0005516//calmodulin binding;GO:0030552//cAMP binding;GO:0030553//cGMP binding;GO:0005216//ion channel activity;	K05391//cyclic nucleotide gated channel, plant+ko04626//Plant-pathogen interaction;	>KAB1206232.1 Cyclic nucleotide-gated ion channel 1 [Morella rubra]
CJ030_MR7G014383	-24.0142	7.99996e-07	22.56	0	0	0	0	0	bHLH	GO:0016021//integral component of membrane;GO:0005886//plasma membrane;GO:0005516//calmodulin binding;GO:0030552//cAMP binding;GO:0030553//cGMP binding;GO:0005216//ion channel activity;	K05391//cyclic nucleotide gated channel, plant+ko04626//Plant-pathogen interaction;	>KAB1206238.1 Cyclic nucleotide-gated ion channel 1 [Morella rubra]
CJ030_MR7G015304	10.221	3.42781e-11	0.06	35.26	23.42	0.1	19.17	0				>KAB1204863.1 hypothetical protein CJ030_MR7G015304 [Morella rubra] >KAB1204874.1 hypothetical protein CJ030_MR7G015292 [Morella rubra]
CJ030_MR8G000572	-24.1822	6.38302e-07	0	0	0	30.6	0	0	C2H2	GO:0004190//aspartic-type endopeptidase activity;		>KAB1203423.1 Aspartic proteinase-like protein 2 [Morella rubra]
CJ030_MR8G004364	-21.3507	3.52755e-07	2.9	0	0	0	0	0	LBD	GO:0005829//cytosol;GO:0012505//endomembrane system;GO:0043531//ADP binding;GO:0005524//ATP binding;GO:0043130//ubiquitin binding;GO:0006952//defense response;	K13415//protein brassinosteroid insensitive 1 [EC:2.7.10.1 2.7.11.1]+ko04075//Plant hormone signal transduction;	>KAB1201828.1 hypothetical protein CJ030_MR8G004364 [Morella rubra]
XLOC_003656	23.3733	1.80699e-06	0.01	10.1	0	0.01	0	0.01	C3H	GO:0009570//chloroplast stroma;GO:0051538//3 iron, 4 sulfur cluster binding;GO:0016041//glutamate synthase (ferredoxin) activity;GO:0016040//glutamate synthase (NADH) activity;GO:0015930//glutamate synthase activity;GO:0046872//metal ion binding;GO:0016491//oxidoreductase activity;GO:0019676//ammonia assimilation cycle;GO:0006537//glutamate biosynthetic process;GO:0097054//L-glutamate biosyntheti…	K00284//glutamate synthase (ferredoxin) [EC:1.4.7.1]+ko00630//Glyoxylate and dicarboxylate metabolism+ko00910//Nitrogen metabolism;	>KAB1222197.1 Ferredoxin-dependent glutamate synthase 1, chloroplastic/mitochondrial [Morella rubra] >KAB1222222.1 Ferredoxin-dependent glutamate synthase 1, chloroplastic/mitochondrial [Morella rubra]
XLOC_004080	21.3606	2.63209e-05	0.02	0.02	0.03	0.02	9.57	0.03		GO:0016021//integral component of membrane;		>KAB1211661.1 hypothetical protein CJ030_MR6G023409 [Morella rubra] >KAB1223068.1 hypothetical protein CJ030_MR2G022329 [Morella rubra] >KAB1223071.1 hypothetical protein CJ030_MR2G022326 [Morella rubra]
XLOC_005534	-22.0298	1.07116e-05	7.65	0	0	0	0	0	C2H2	GO:0005737//cytoplasm;GO:0008270//zinc ion binding;	K12501//homogentisate solanesyltransferase [EC:2.5.1.117]+ko00130//Ubiquinone and other terpenoid-quinone biosynthesis+ko01100//Metabolic pathways+ko01110//Biosynthesis of secondary metabolites+ko01240//Biosynthesis of cofactors;	>KAB1222439.1 hypothetical protein CJ030_MR2G028767 [Morella rubra] >KAB1222442.1 hypothetical protein CJ030_MR2G028770 [Morella rubra]
XLOC_006585	21.2026	2.27547e-07	0	0	0	0	3.75	0	C3H	GO:0005634//nucleus;GO:0003677//DNA binding;GO:0003700//DNA-binding transcription factor activity;GO:0046872//metal ion binding;GO:0071456//cellular response to hypoxia;GO:0050832//defense response to fungus;GO:0006355//regulation of transcription, DNA-templated;GO:0010200//response to chitin;GO:0009409//response to cold;		>KAB1217623.1 Zinc finger CCCH domain-containing protein 29 [Morella rubra] >KAB1217691.1 Zinc finger CCCH domain-containing protein 29 [Morella rubra] >KAB1217725.1 Zinc finger CCCH domain-containing protein 29 [Morella rubra]
XLOC_008384	6.46911	0.0242118	0	0.63	0.76	0	1.15	0	MYB	GO:0005737//cytoplasm;GO:0005634//nucleus;GO:0043531//ADP binding;GO:0050135//NAD(P)+ nucleosidase activity;GO:0003953//NAD+ nucleosidase activity;GO:0061809//NAD+ nucleotidase, cyclic ADP-ribose generating;GO:0050832//defense response to fungus;GO:0019677//NAD catabolic process;GO:0043068//positive regulation of programmed cell death;GO:0007165//signal transduction;	K00695//sucrose synthase [EC:2.4.1.13]+ko00500//Starch and sucrose metabolism+ko01100//Metabolic pathways+ko01110//Biosynthesis of secondary metabolites;	>KAG6735056.1 hypothetical protein I3842_01G301300 [Carya illinoinensis]
XLOC_008387	7.64269	1.4287e-05	0	0.66	0.68	0	0.66	0		GO:0005737//cytoplasm;GO:0016021//integral component of membrane;GO:0005886//plasma membrane;GO:0005096//GTPase activator activity;GO:0045159//myosin II binding;GO:0019905//syntaxin binding;GO:0017157//regulation of exocytosis;GO:0016192//vesicle-mediated transport;		>KAB1217625.1 Syntaxin-binding protein 5-like [Morella rubra] >KAB1217694.1 Syntaxin-binding protein 5-like [Morella rubra]
XLOC_008390	21.7514	1.52399e-05	0	0	5.45	0	0	0	Trihelix	GO:0005739//mitochondrion;		>KAB1217640.1 hypothetical protein CJ030_MR3G012213 [Morella rubra] >KAB1217707.1 hypothetical protein CJ030_MR3G014883 [Morella rubra]
XLOC_010569	-21.1263	3.25287e-07	4.93	0	0	0	0	0			K03231//elongation factor 1-alpha+ko03013//Nucleocytoplasmic transport;	>KAB1216147.1 Interactor of constitutive active ROPs 4 [Morella rubra] >KAB1216149.1 Interactor of constitutive active ROPs 4 [Morella rubra]
XLOC_017316	6.09446	0.000242748	0.28	19.7	0.41	0.22	22.64	0.29	FAR1	GO:0005794//Golgi apparatus;GO:0000137//Golgi cis cisterna;GO:0016021//integral component of membrane;GO:0010222//stem vascular tissue pattern formation;		>KAB1209043.1 hypothetical protein CJ030_MR6G025917 [Morella rubra] >KAB1209048.1 hypothetical protein CJ030_MR6G025922 [Morella rubra] >KAB1209249.1 hypothetical protein CJ030_MR6G016109 [Morella rubra]
XLOC_021848	-22.7334	4.01802e-06	9.78	0	0	0	0	0				>KAB1208179.1 Pheophytinase, chloroplastic [Morella rubra] >KAB1210834.1 Pheophytinase, chloroplastic [Morella rubra]
XLOC_022076	-23.0559	2.77555e-06	25.34	0	0	0	0	0		GO:0005737//cytoplasm;GO:0005634//nucleus;GO:0003723//RNA binding;GO:0006397//mRNA processing;	K12839//survival of motor neuron-related-splicing factor 30+ko03040//Spliceosome;	>KAB1208625.1 Survival of motor neuron-related-splicing factor 30 [Morella rubra] >KAB1208627.1 Survival of motor neuron-related-splicing factor 30 [Morella rubra]
XLOC_025067	-21.5102	2.45475e-07	4.77	0	0	0	0	0	MYB	GO:0005829//cytosol;GO:0005730//nucleolus;GO:0005634//nucleus;GO:0009506//plasmodesma;GO:0005524//ATP binding;GO:0016887//ATPase activity;GO:0003690//double-stranded DNA binding;GO:0003725//double-stranded RNA binding;GO:0003729//mRNA binding;GO:0003723//RNA binding;GO:0003724//RNA helicase activity;GO:0003727//single-stranded RNA binding;GO:0006397//mRNA processing;GO:0051028//mRNA transport;GO:…	K12812//ATP-dependent RNA helicase UAP56/SUB2 [EC:3.6.4.13]+ko03013//Nucleocytoplasmic transport+ko03015//mRNA surveillance pathway+ko03040//Spliceosome;	>XP_018822222.1 DEAD-box ATP-dependent RNA helicase 15 [Juglans regia] >XP_041019589.1 DEAD-box ATP-dependent RNA helicase 15 [Juglans microcarpa x Juglans regia] >KAF5456721.1 hypothetical protein F2P56_026168 [Juglans regia]
XLOC_025672	-21.6003	2.27547e-07	0	0	0	0	0	3.88				>KAB1201567.1 hypothetical protein CJ030_MR0G003162 [Morella rubra] >KAB1201569.1 hypothetical protein CJ030_MR0G003164 [Morella rubra]
XLOC_026060	-23.8989	8.83119e-07	13.68	0	0	0	0	0	Nin-like	GO:0005634//nucleus;GO:0001046//core promoter sequence-specific DNA binding;GO:0003700//DNA-binding transcription factor activity;GO:0000976//transcription regulatory region sequence-specific DNA binding;GO:0042128//nitrate assimilation;GO:0010167//response to nitrate;GO:0009414//response to water deprivation;GO:0010118//stomatal movement;		>KAB1201136.1 Protein NLP7 [Morella rubra] >KAB1201139.1 Protein NLP7 [Morella rubra]
